# Supplementary material for: Effect of alkyl substituents in BODIPYs: a comparative DFT computational investigation
Source: Royal Society of Chemistry journal article supplement (doi:10.1039/c4ra12071j), 2014-12-01
Supplement: c4ra12071j1.pdf [file c4ra12071j1.pdf]

## *Supporting Information-1*

# **Effect of Alkyl Substituents in BODIPYs: A Comparative DFT Computational Investigation**

*Sanjoy Mukherjee and Pakkirisamy Thilagar\**

Department of Inorganic and Physical Chemistry, Indian Institute of Science, Bangalore-560012

Email: sanjoymkj@ipc.iisc.ernet.in, thilagar@ipc.iisc.ernet.in

---

### **Table of Contents**

|                                              |                     |
|----------------------------------------------|---------------------|
| Graphical comparison of the model BODIPYs    | Page S1-2 to S1-10  |
| Dihedral arrangements of the model BODIPYs   | Page S1-11 to S1-24 |
| FMOs of the model BODIPYs                    | Page S1-24 to S1-33 |
| Comparative data tables of the model BODIPYs | Page S1-34 to S1-44 |

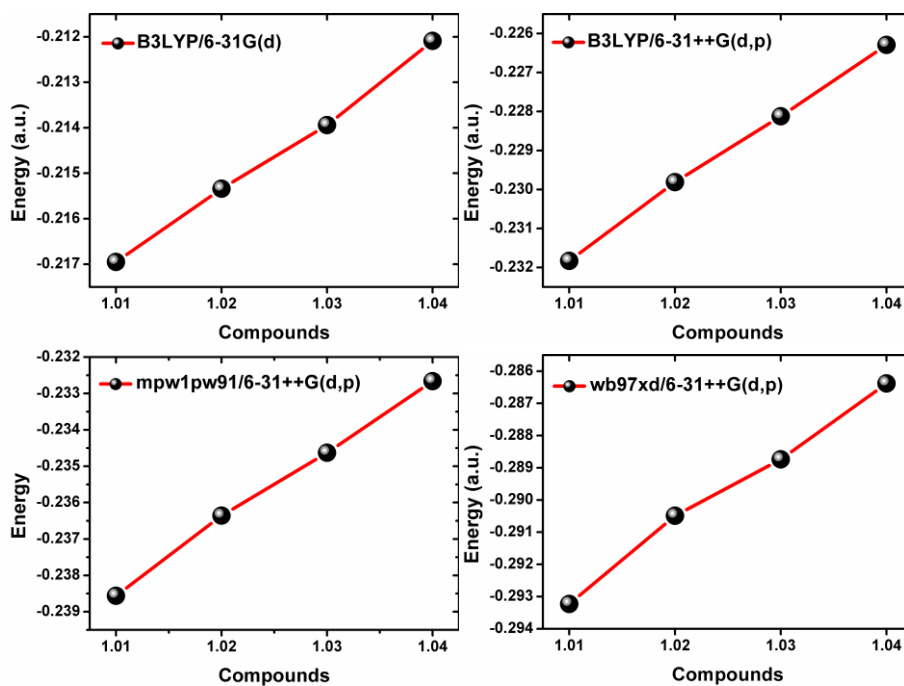

Figure S1-1: Comparison of the HOMO energies in series **1** as obtained from different computational methodologies.

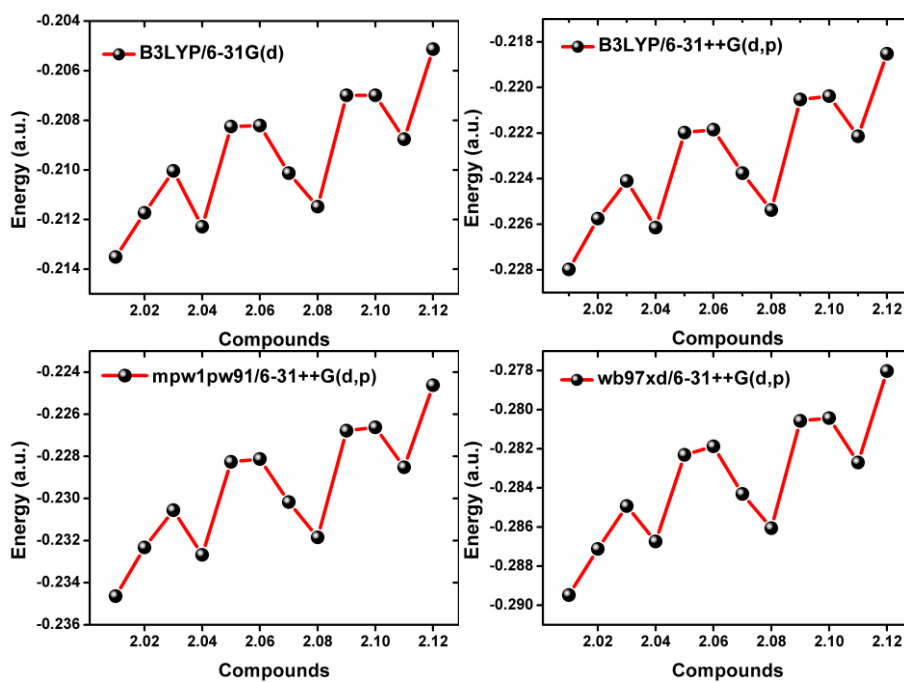

Figure S1-2: Comparison of the HOMO energies in series **2** as obtained from different computational methodologies.

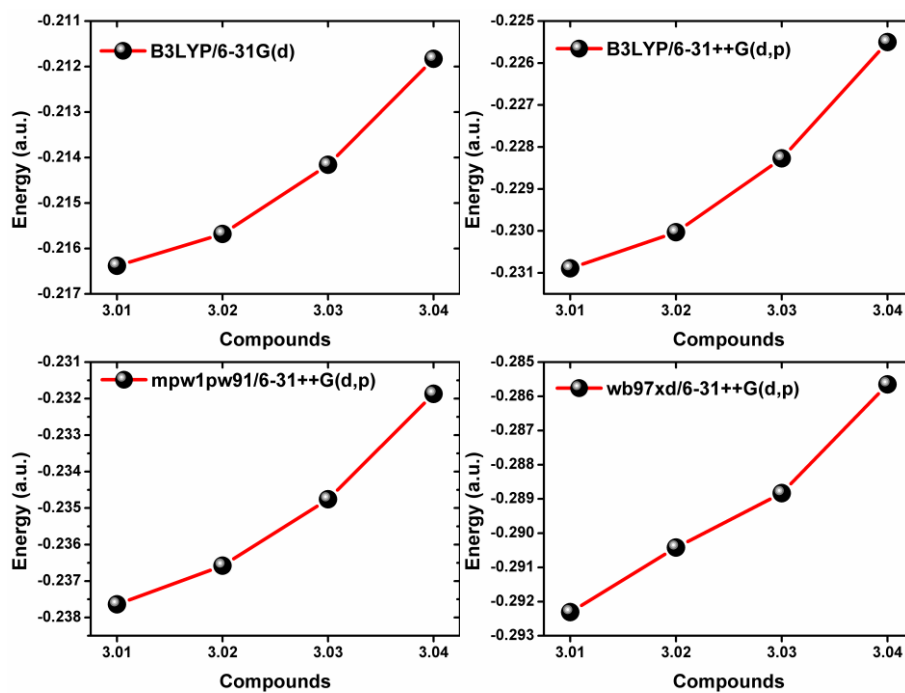

Figure S1-3: Comparison of the HOMO energies in series 3 as obtained from different computational methodologies.

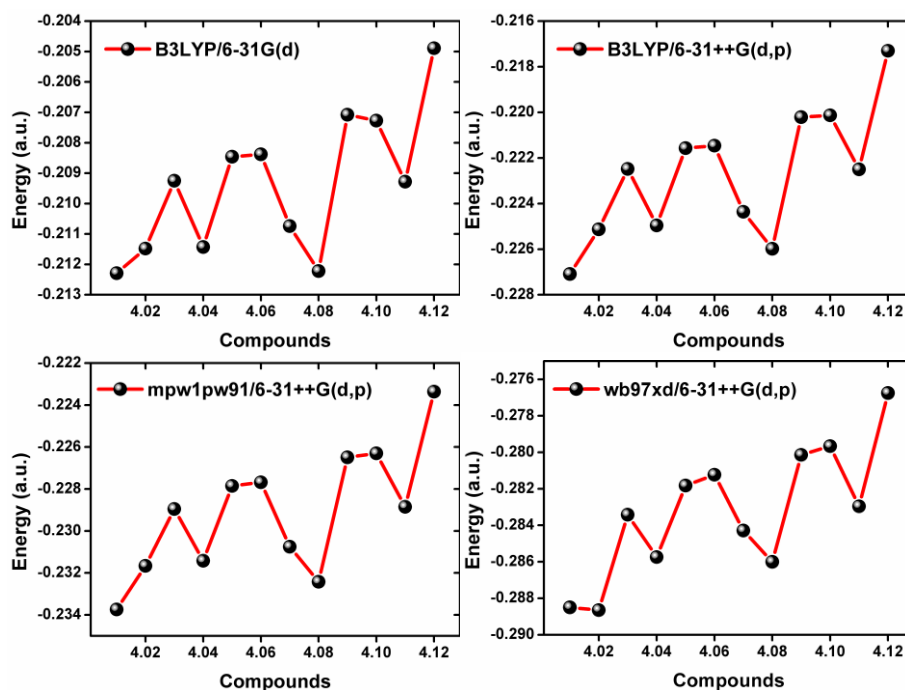

Figure S1-4: Comparison of the HOMO energies in series 4 as obtained from different computational methodologies.

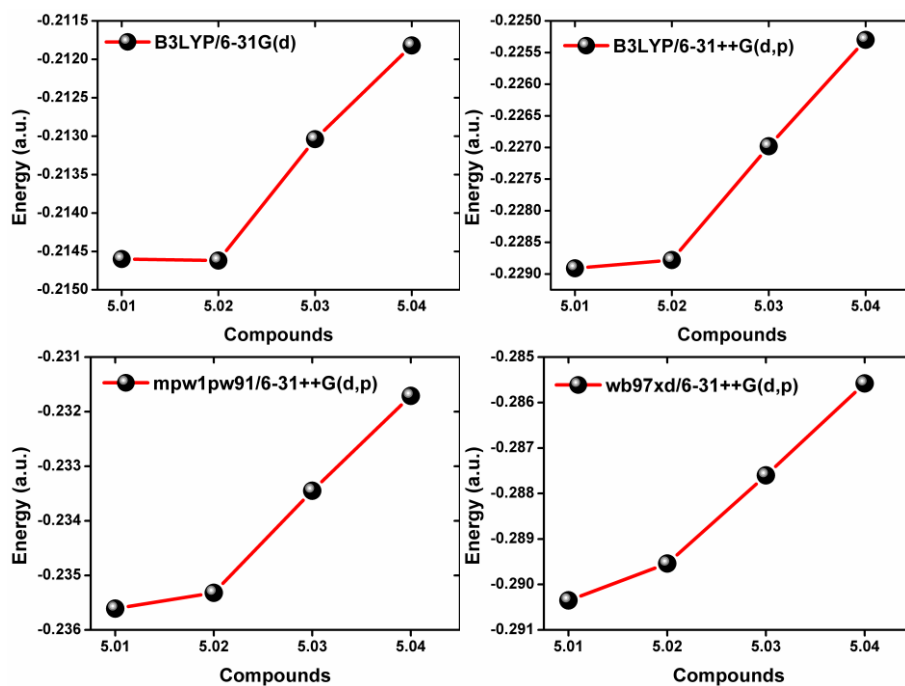

Figure S1-5: Comparison of the HOMO energies in series 5 as obtained from different computational methodologies.

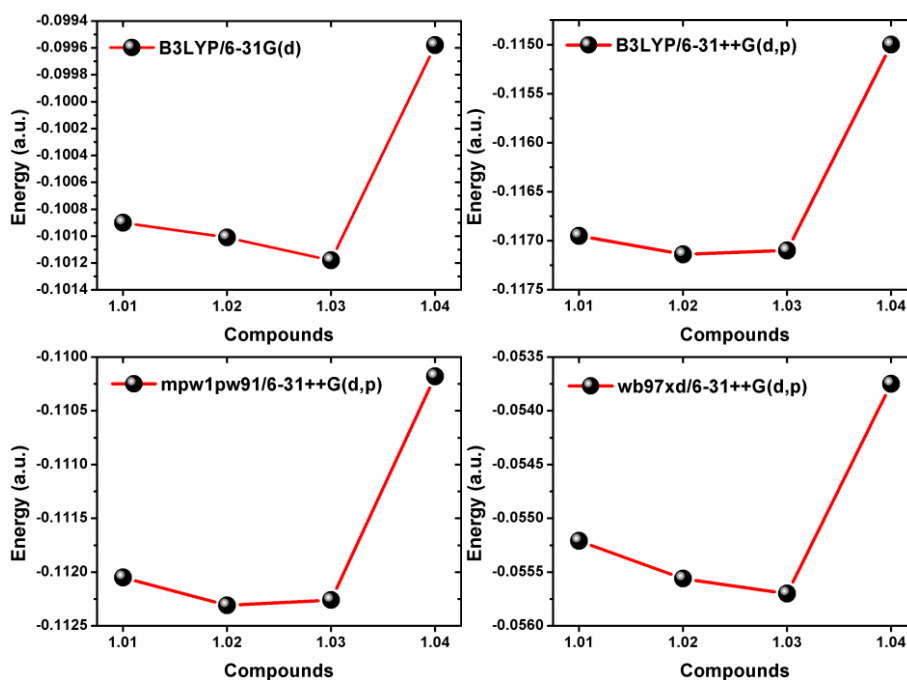

Figure S1-6: Comparison of the LUMO energies in series 1 as obtained from different computational methodologies.

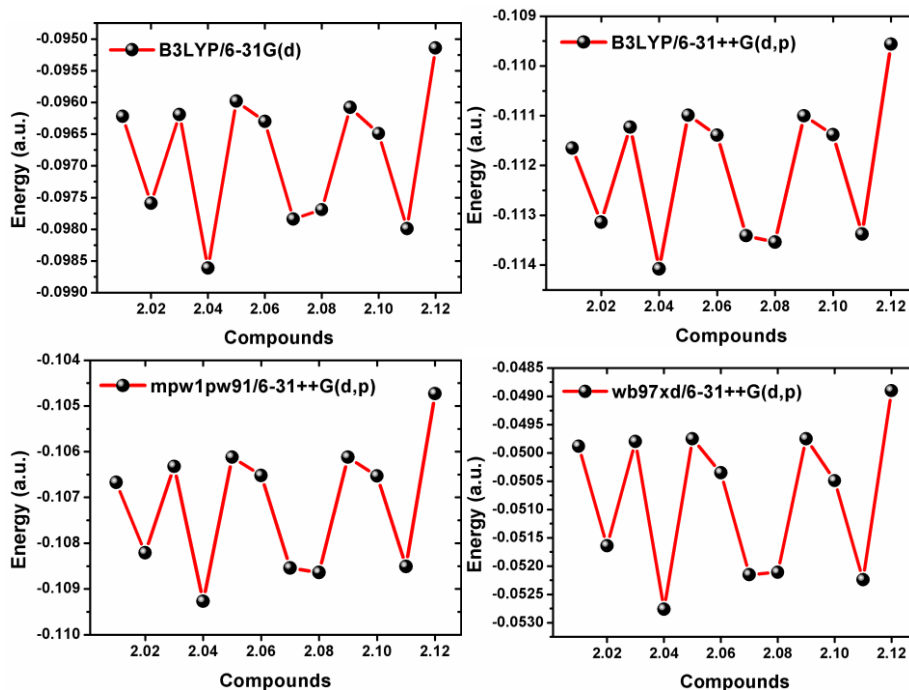

Figure S1-7: Comparison of the LUMO energies in series 2 as obtained from different computational methodologies.

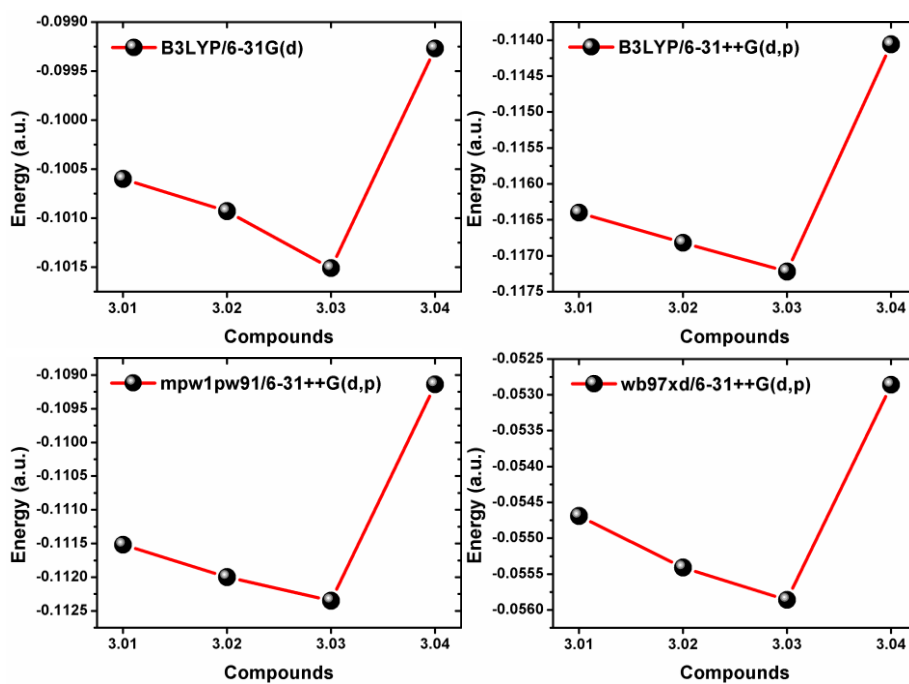

Figure S1-8: Comparison of the LUMO energies in series 3 as obtained from different computational methodologies.

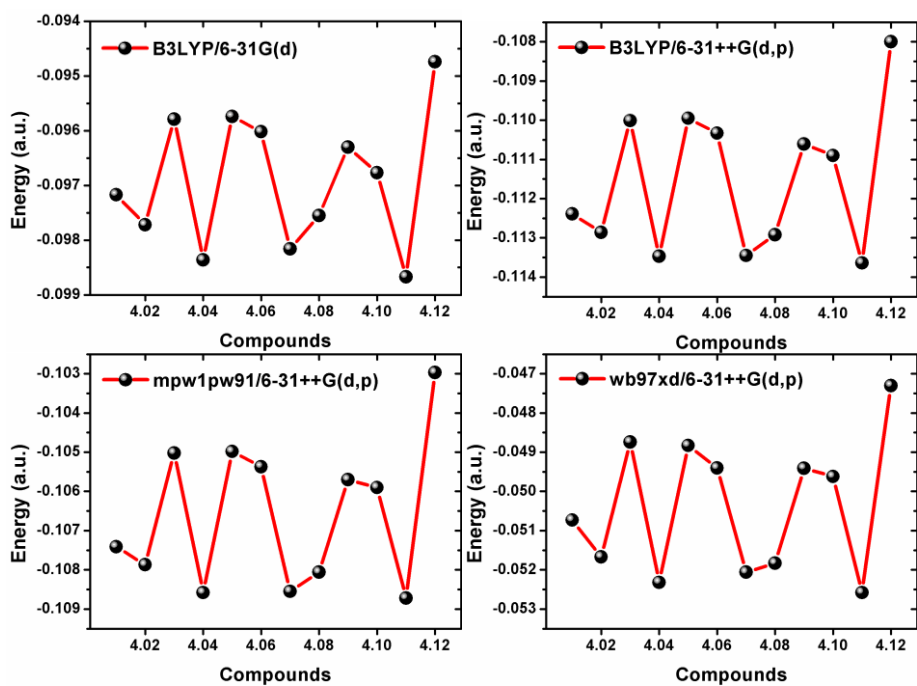

Figure S1-9: Comparison of the LUMO energies in series 4 as obtained from different computational methodologies.

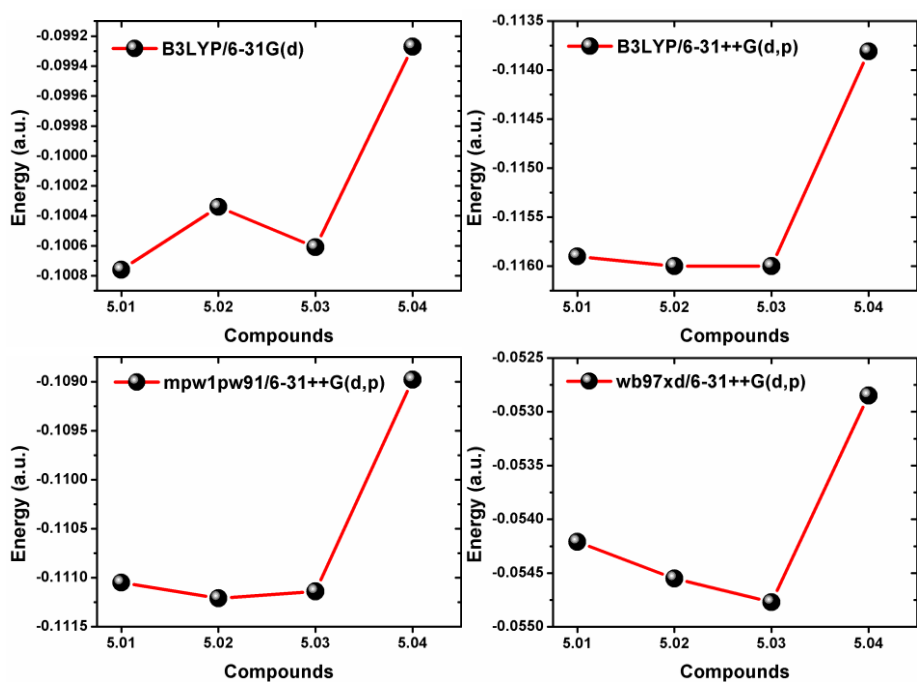

Figure S1-10: Comparison of the LUMO energies in series 5 as obtained from different computational methodologies.

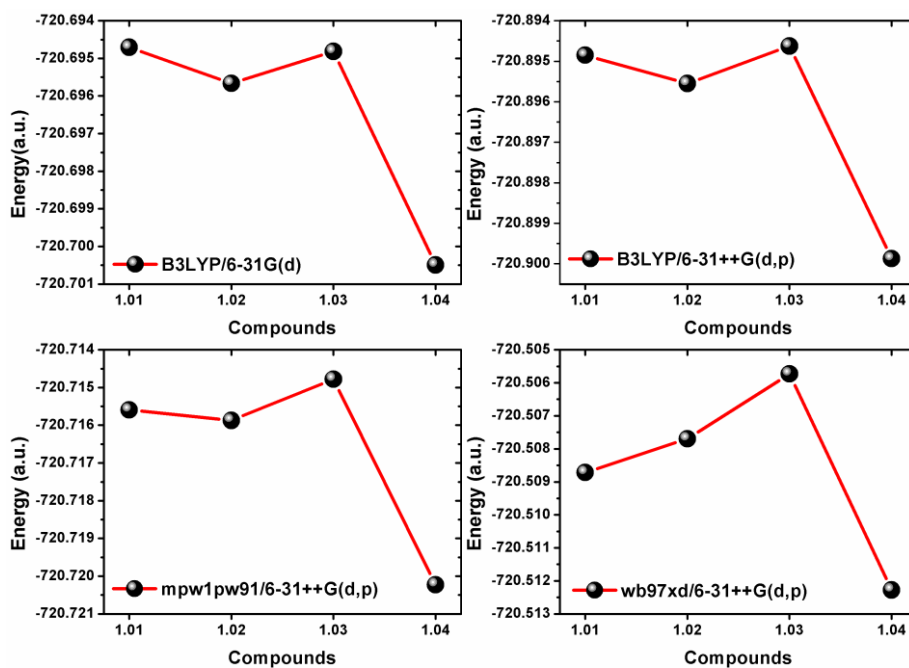

Figure S1-11: Comparison of the total energies of the model systems in series 1 as obtained from different computational methodologies.

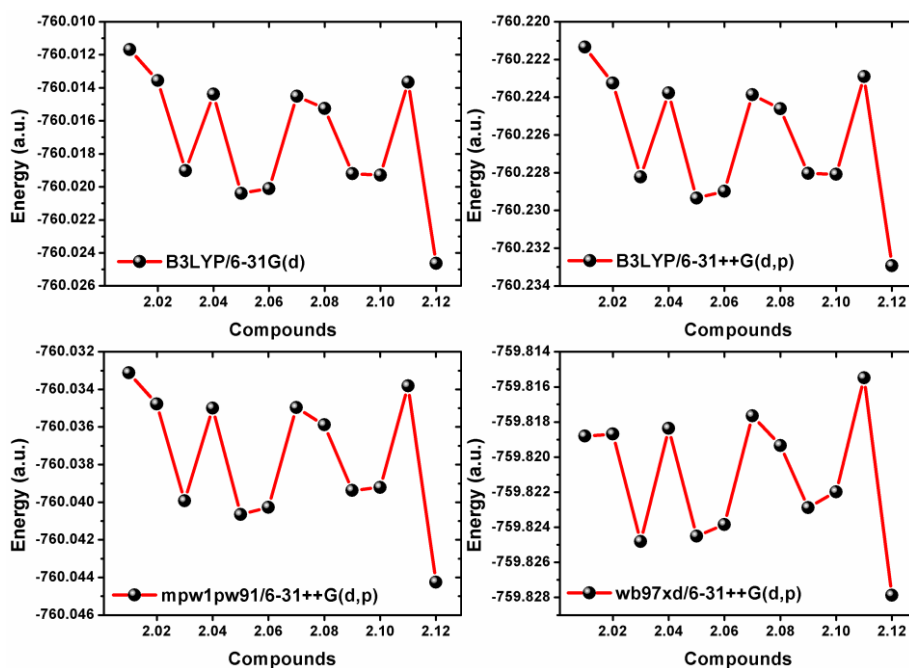

Figure S1-12: Comparison of the total energies of the model systems in series 2 as obtained from different computational methodologies.

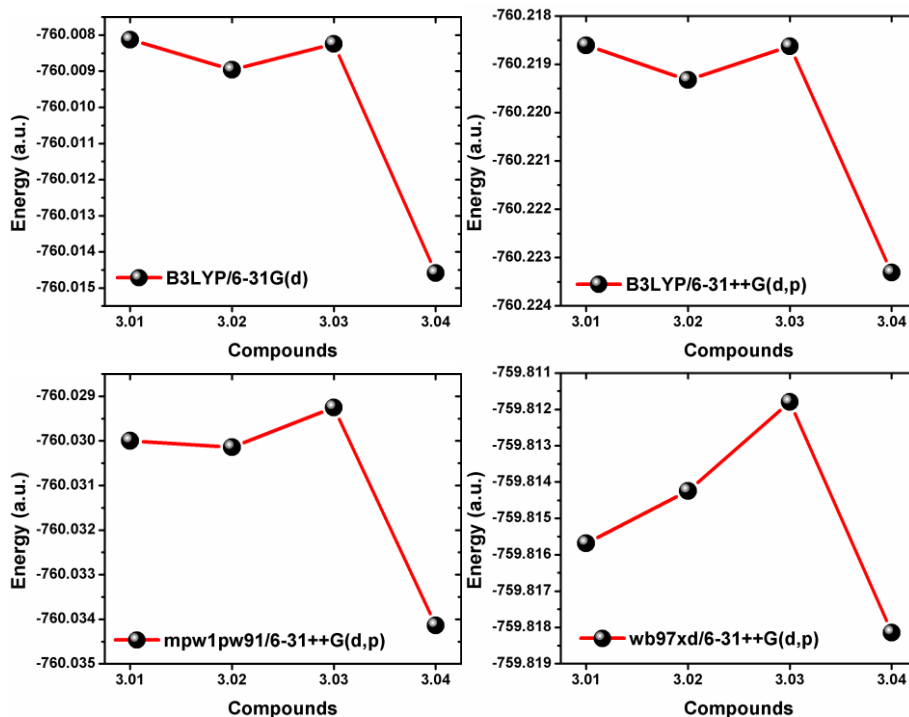

Figure S1-13: Comparison of the total energies of the model systems in series 3 as obtained from different computational methodologies.

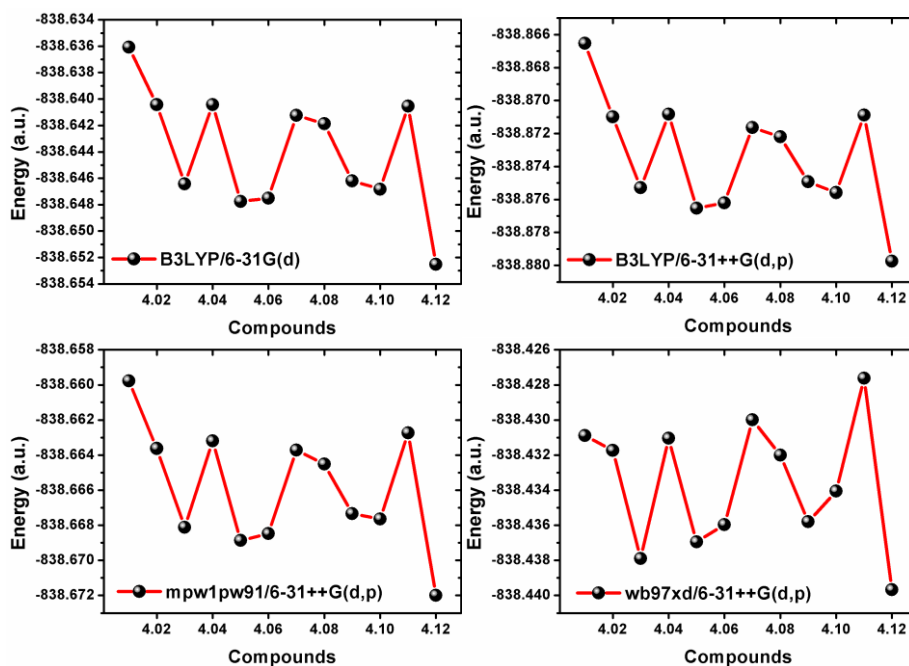

Figure S1-14: Comparison of the total energies of the model systems in series 4 as obtained from different computational methodologies.



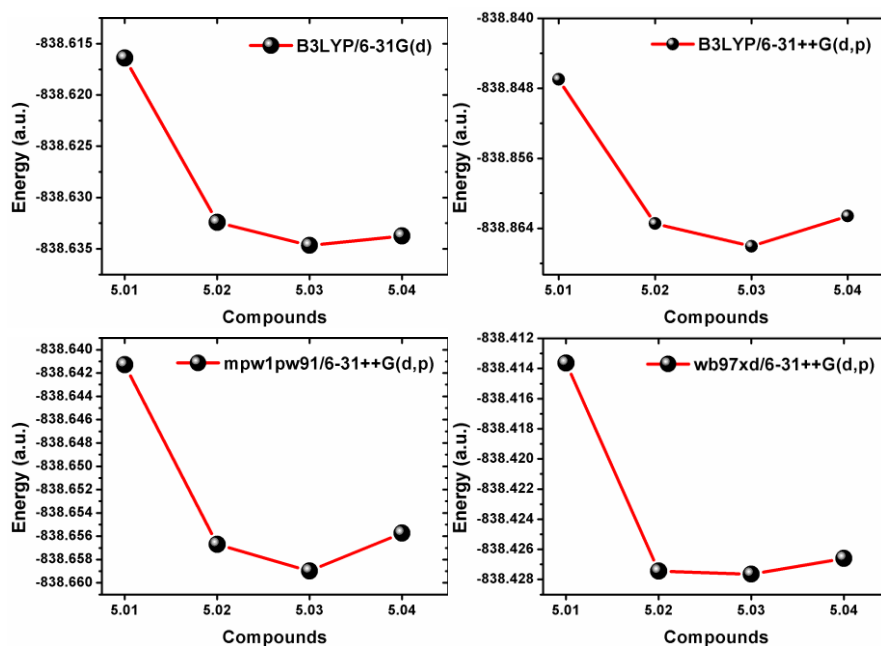

Figure S1-15: Comparison of the total energies of the model systems in series 5 as obtained from different computational methodologies.

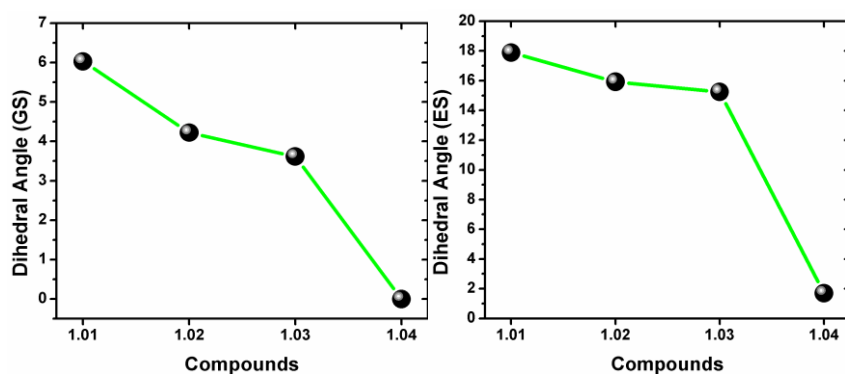

Figure S1-16: Dihedral arrangement between the two pyrrolic units in the model systems of series 1 in their DFT B3LYP/6-31G(d) optimized ground-state (left) and excited-state (right) optimised structures.

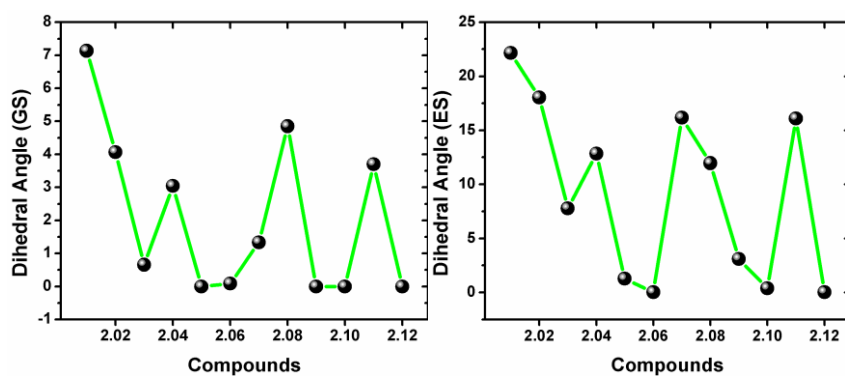

Figure S1-17: Dihedral arrangement between the two pyrrolic units in the model systems of series 2 in their DFT B3LYP/6-31G(d) optimized ground-state (left) and excited-state (right) optimised structures.

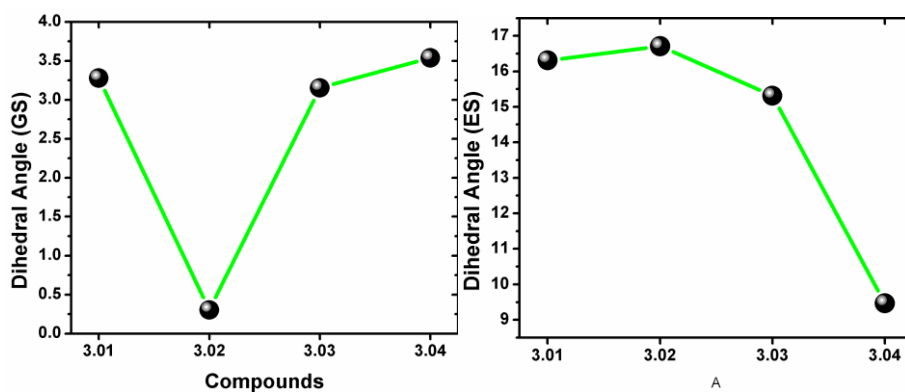

Figure S1-18: Dihedral arrangement between the two pyrrolic units in the model systems of series 3 in their DFT B3LYP/6-31G(d) optimized ground-state (left) and excited-state (right) optimised structures.

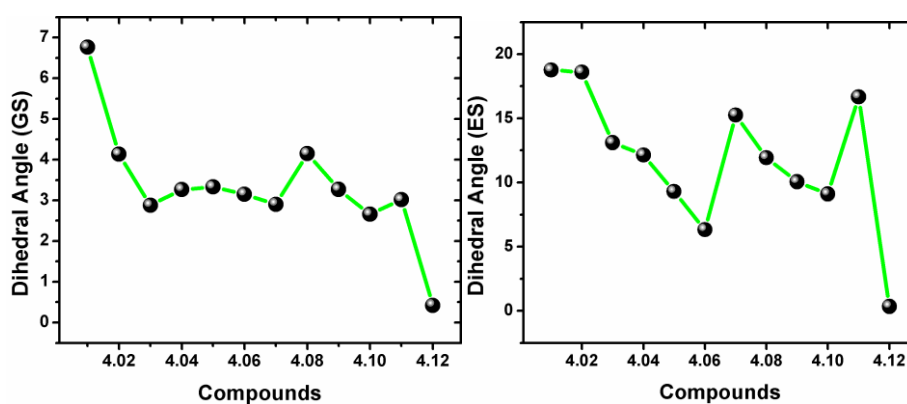

Figure S1-19: Dihedral arrangement between the two pyrrolic units in the model systems of series 4 in their DFT B3LYP/6-31G(d) optimized ground-state (left) and excited-state (right) optimised structures.

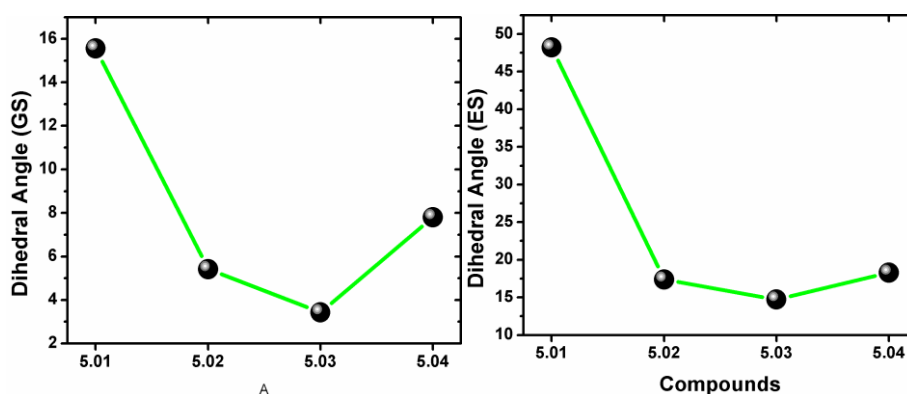

Figure S1-20: Dihedral arrangement between the two pyrrolic units in the model systems of series 5 in their DFT B3LYP/6-31G(d) optimized ground-state (left) and excited-state (right) optimised structures.

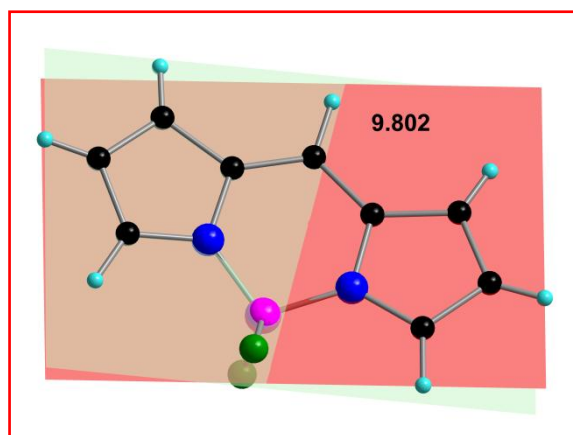

Figure S1-21: Dihedral arrangements between the two pyrrolic units in the DFT B3LYP/6-31G(d) optimised ground state structure of **BODIPY**

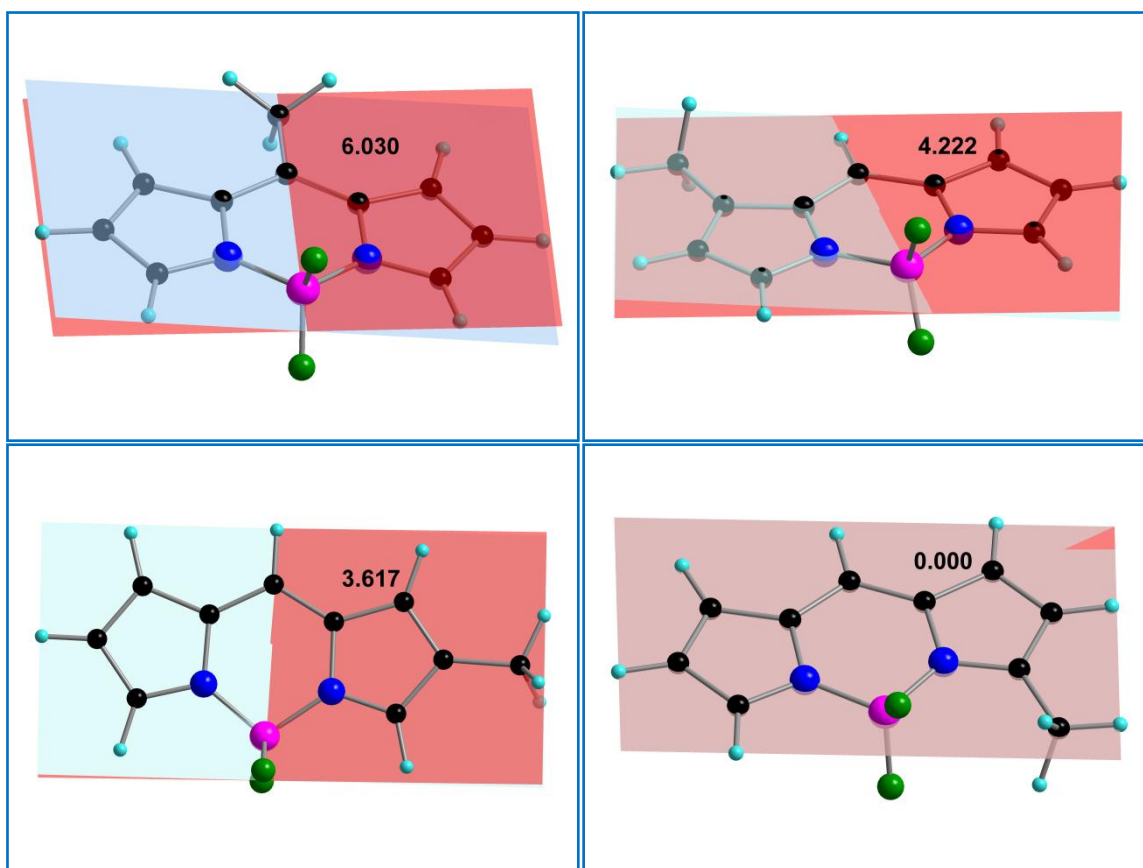

Figure S1-22: Dihedral arrangements between the two pyrrolic units in the DFT B3LYP/6-31G(d) optimised ground state structure of **1.01** to **1.04** respectively.

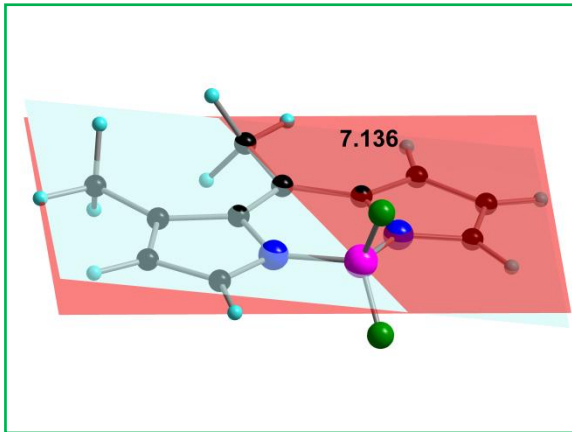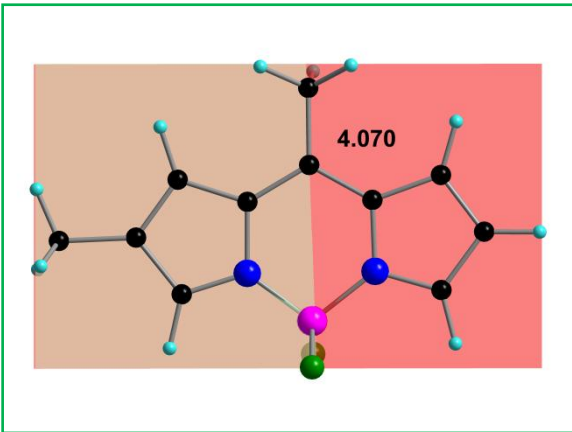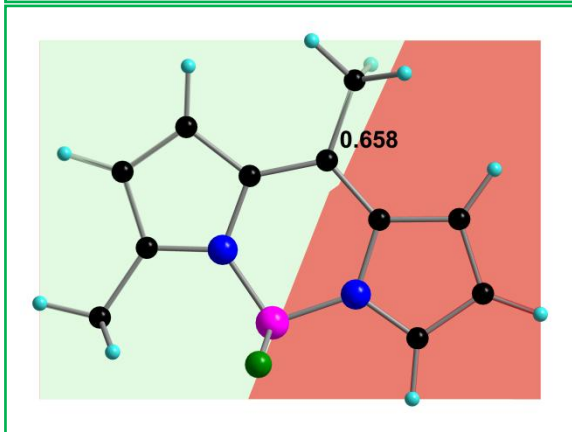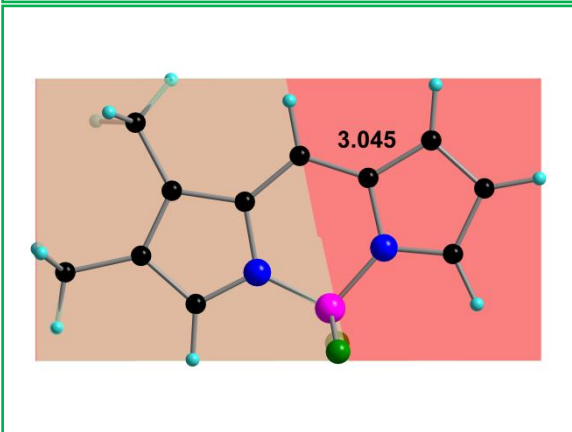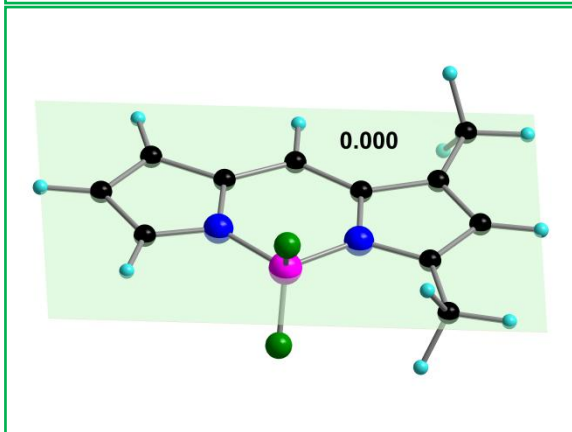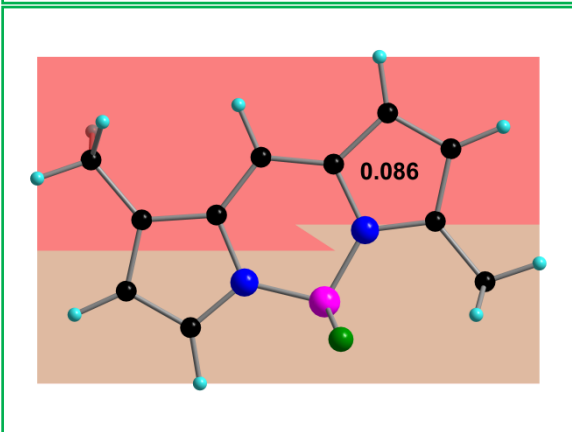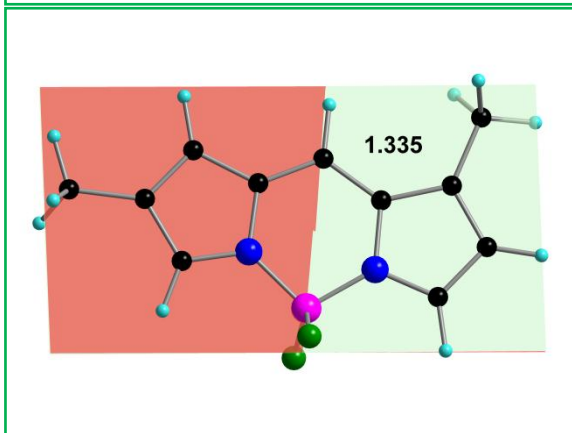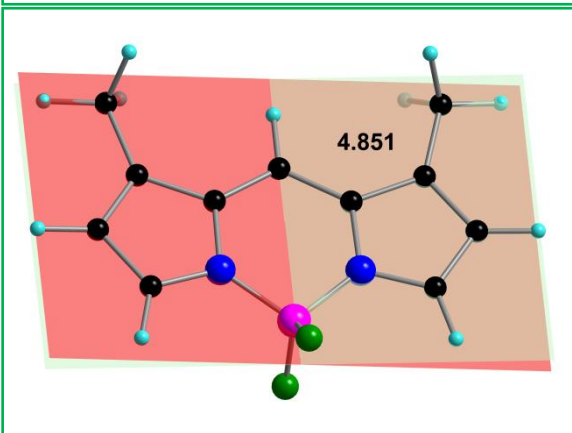

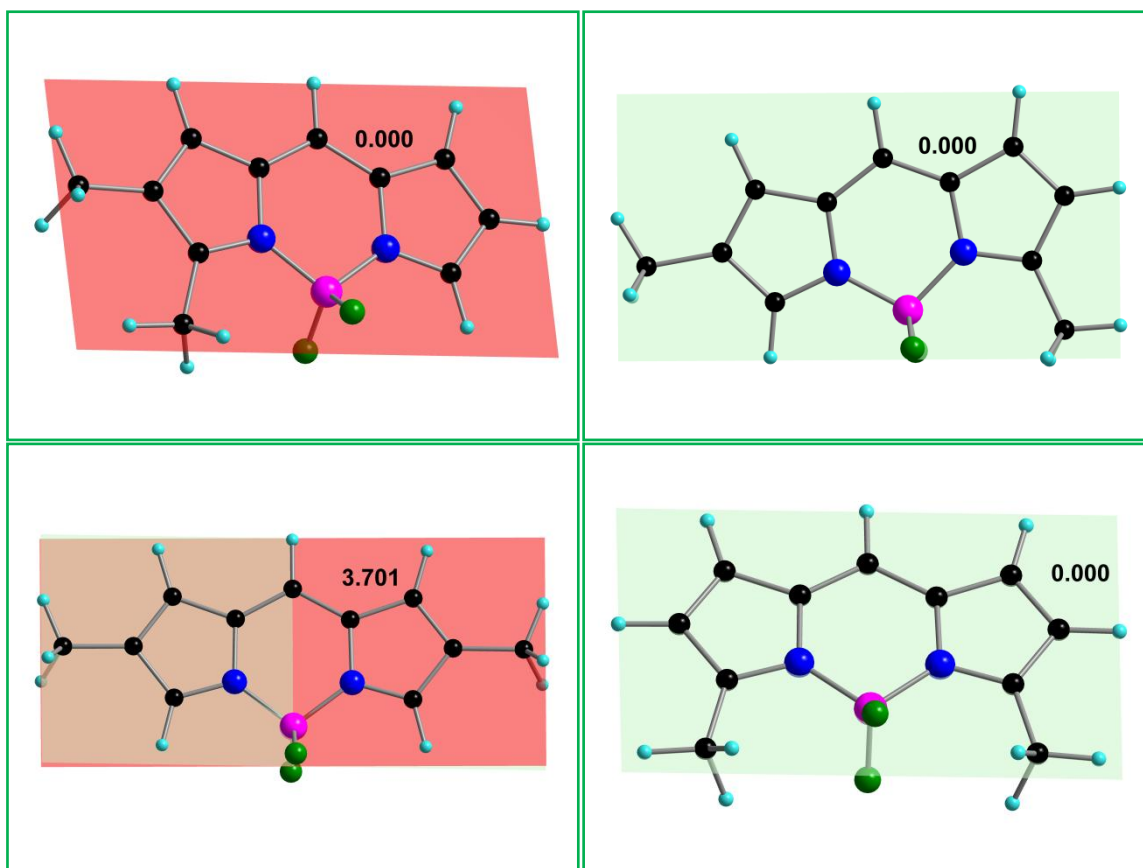

Figure S1-23: Dihedral arrangements between the two pyrrolic units in the DFT B3LYP/6-31G(d) optimised ground state structure of **2.01** to **2.12** respectively.

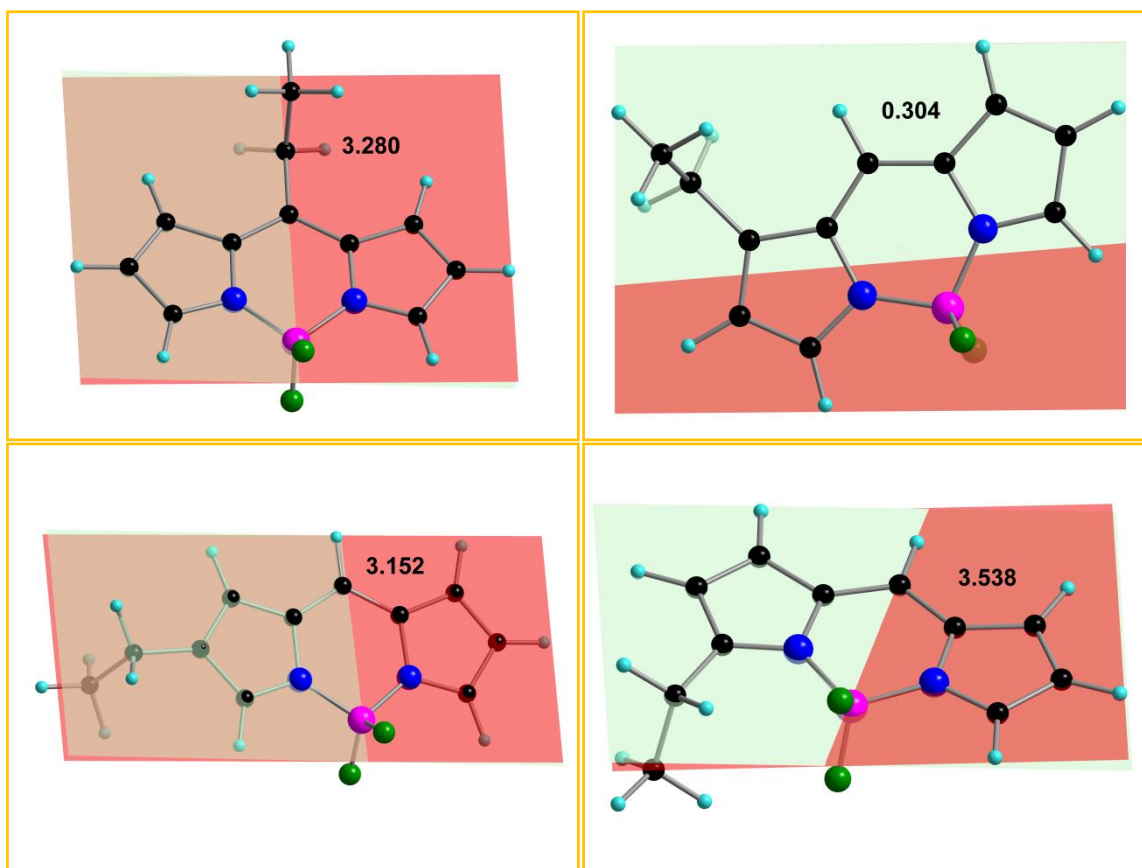

Figure S1-24: Dihedral arrangements between the two pyrrolic units in the DFT B3LYP/6-31G(d) optimised ground state structure of **3.01** to **3.04** respectively.

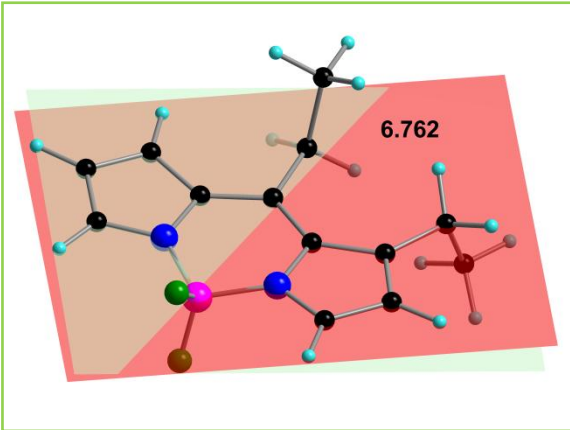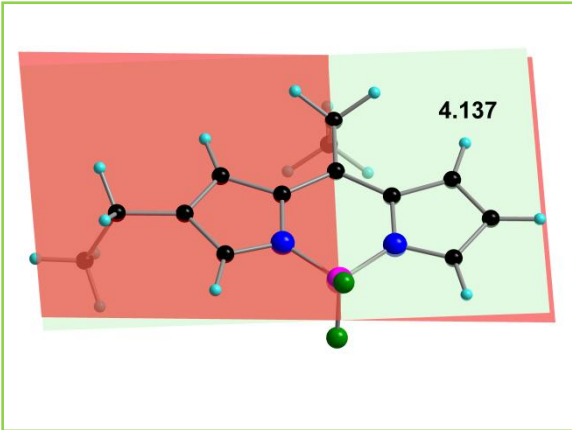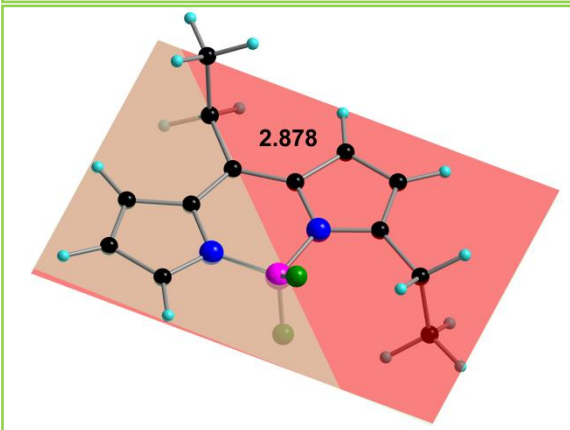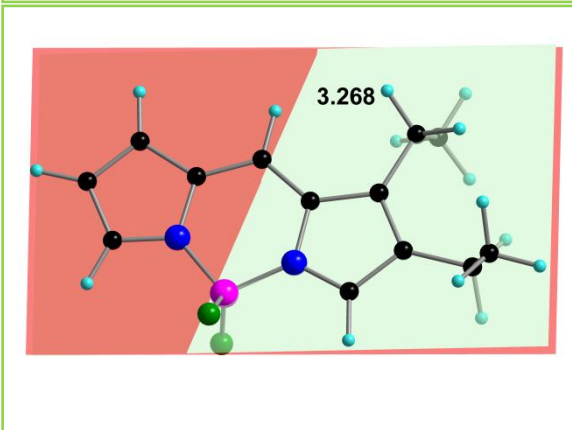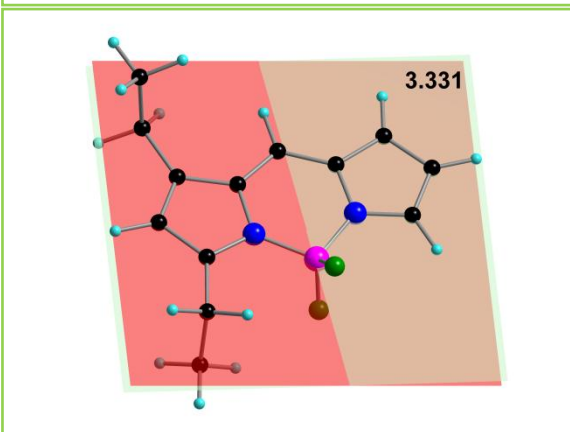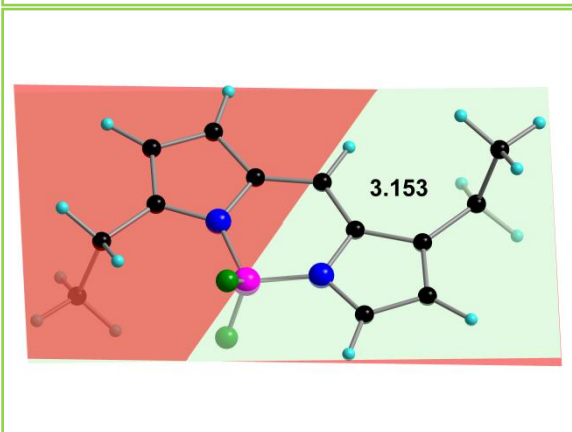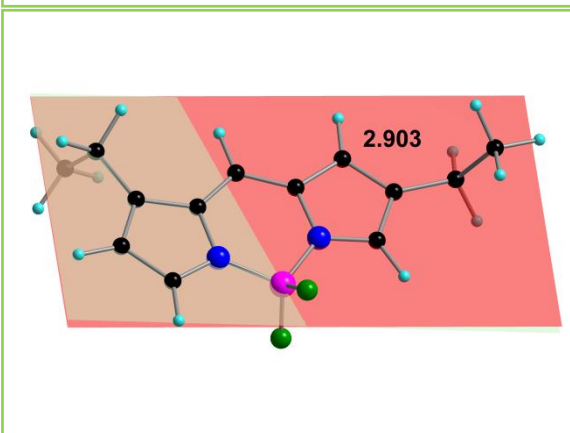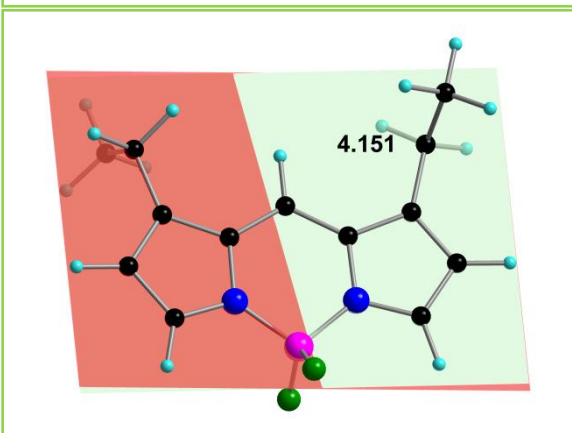

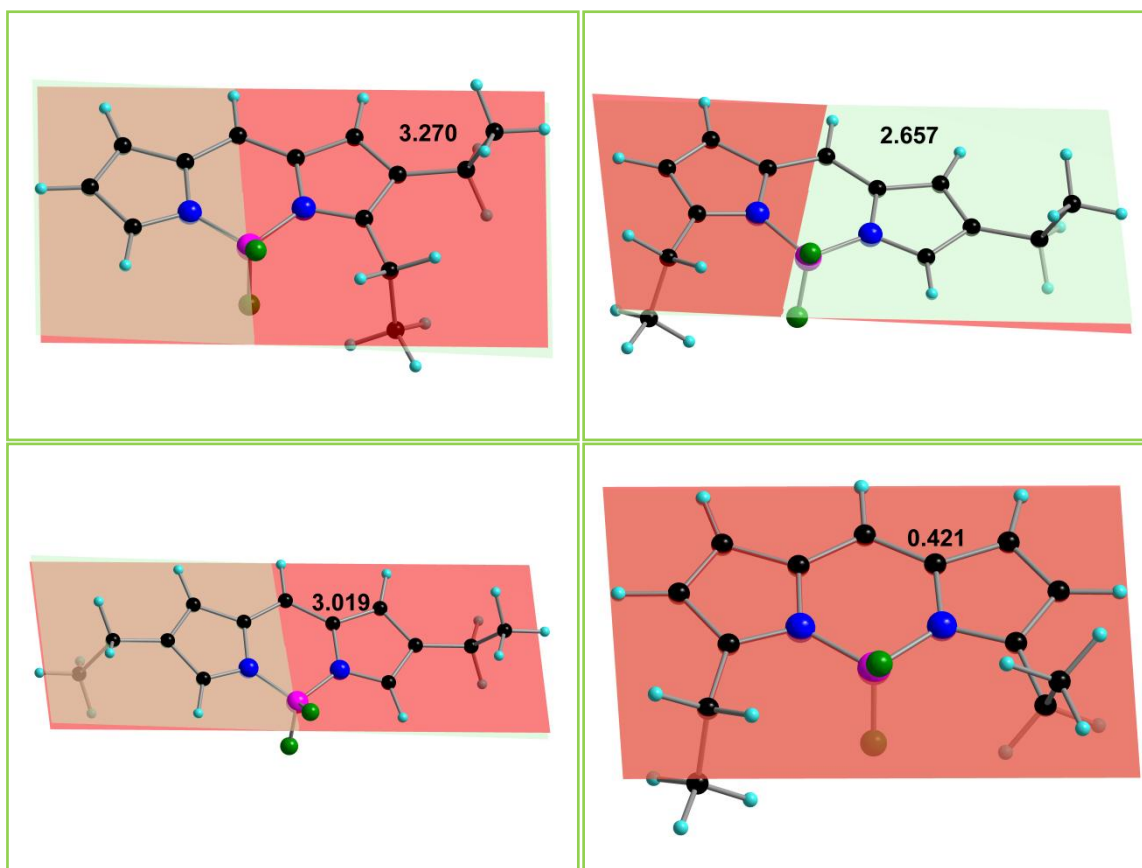

Figure S1-25: Dihedral arrangements between the two pyrrolic units in the DFT B3LYP/6-31G(d) optimised ground state structure of **4.01** to **4.12** respectively.



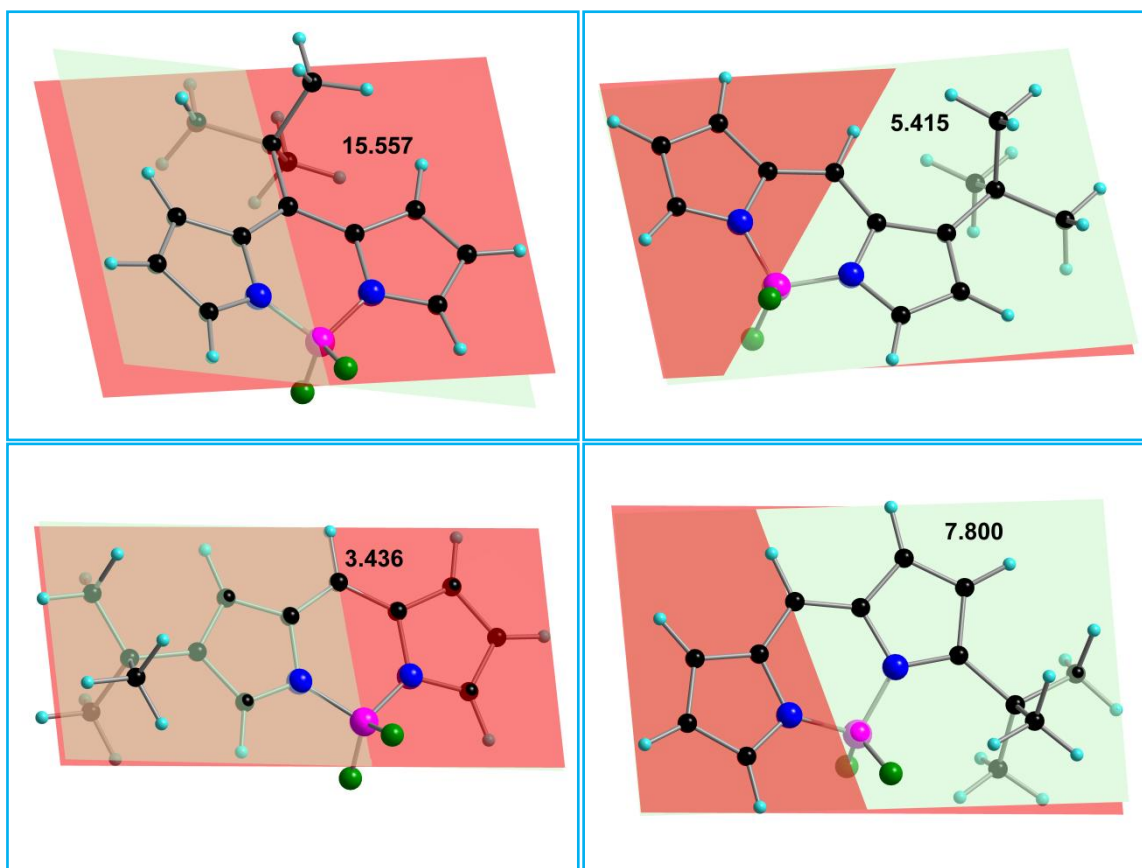

Figure S1-26: Dihedral arrangements between the two pyrrolic units in the DFT B3LYP/6-31G(d) optimised ground state structure of **5.01** to **5.04** respectively.

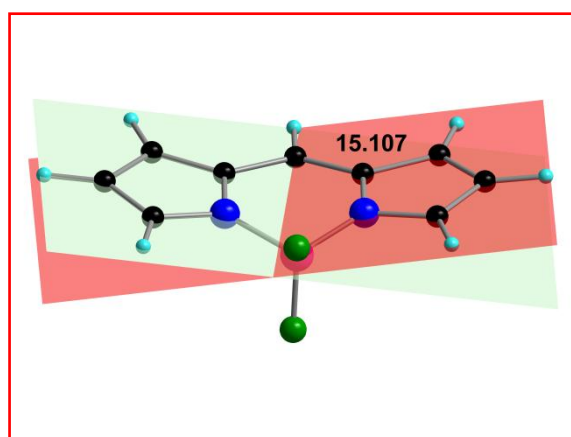

Figure S1-27: Dihedral arrangements between the two pyrrolic units in the DFT B3LYP/6-31G(d) optimised excited state structure of **BODIPY**.

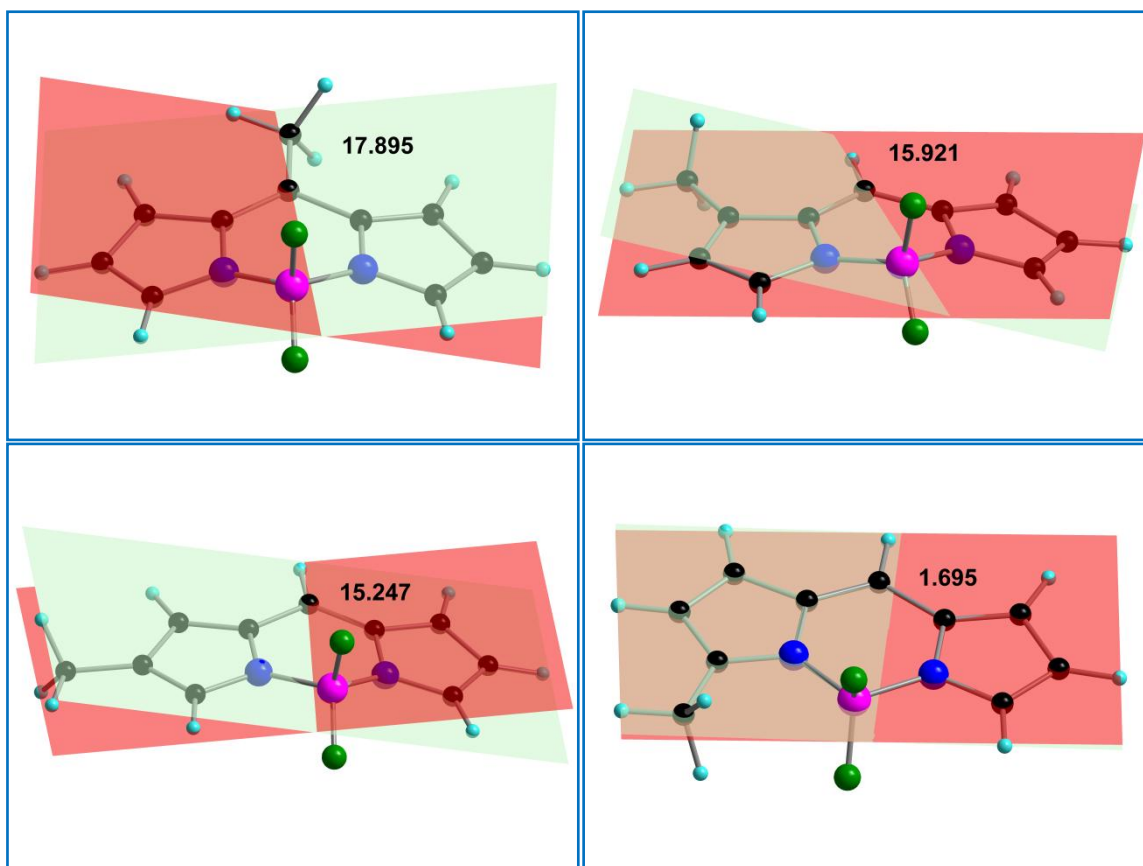

Figure S1-28: Dihedral arrangements between the two pyrrolic units in the DFT B3LYP/6-31G(d) optimised excited state structure of **1.01** to **1.04** respectively.

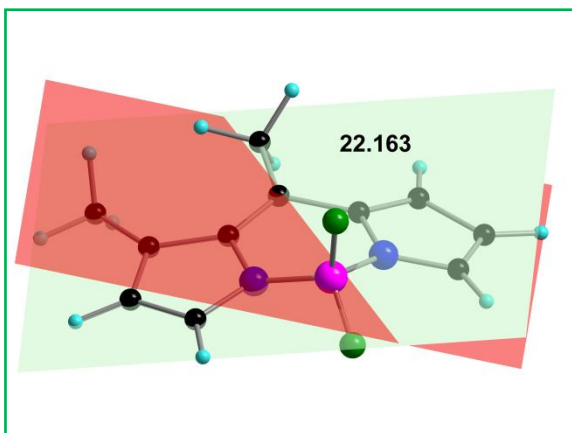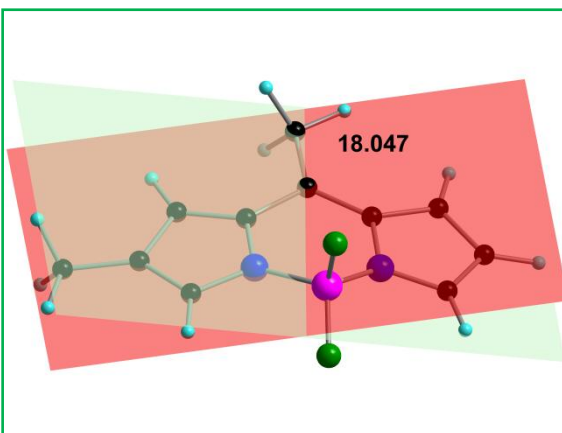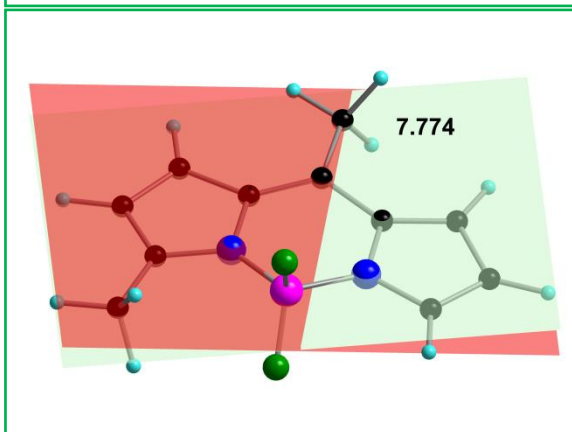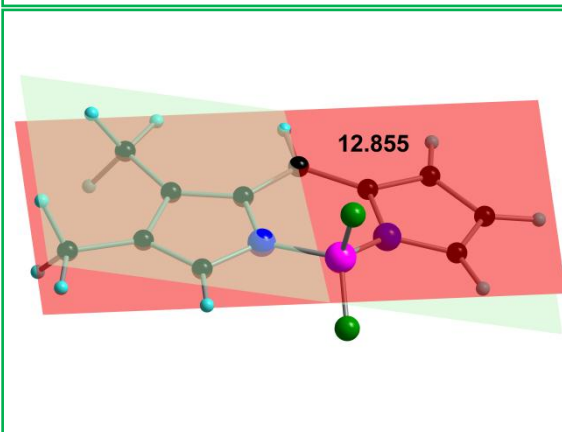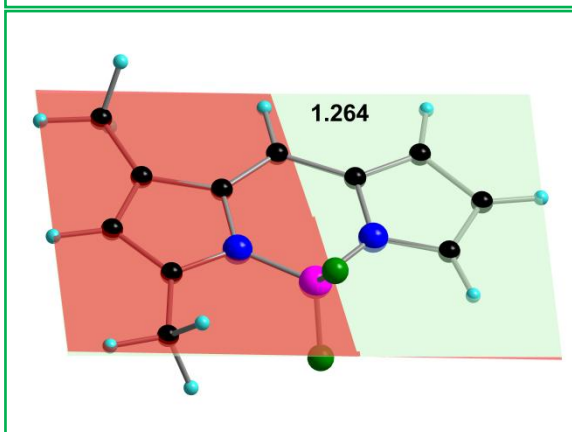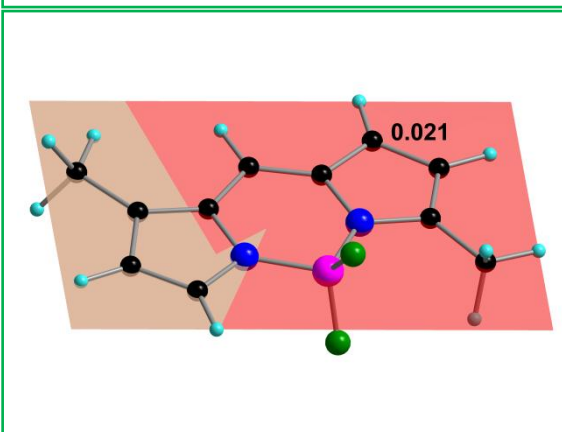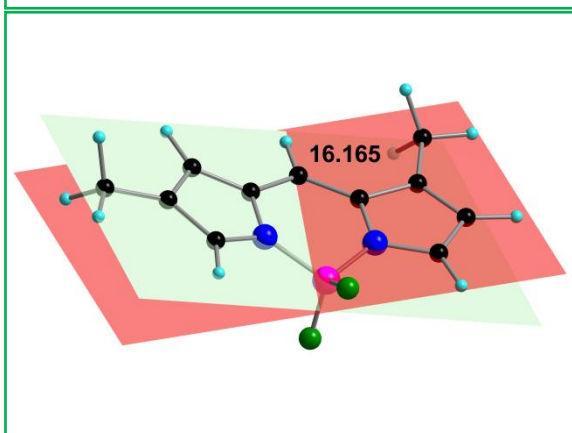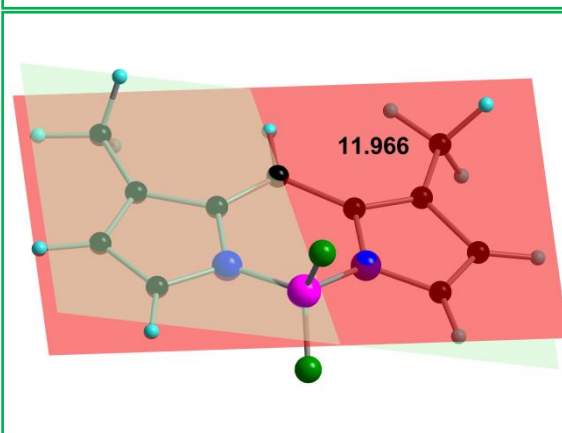

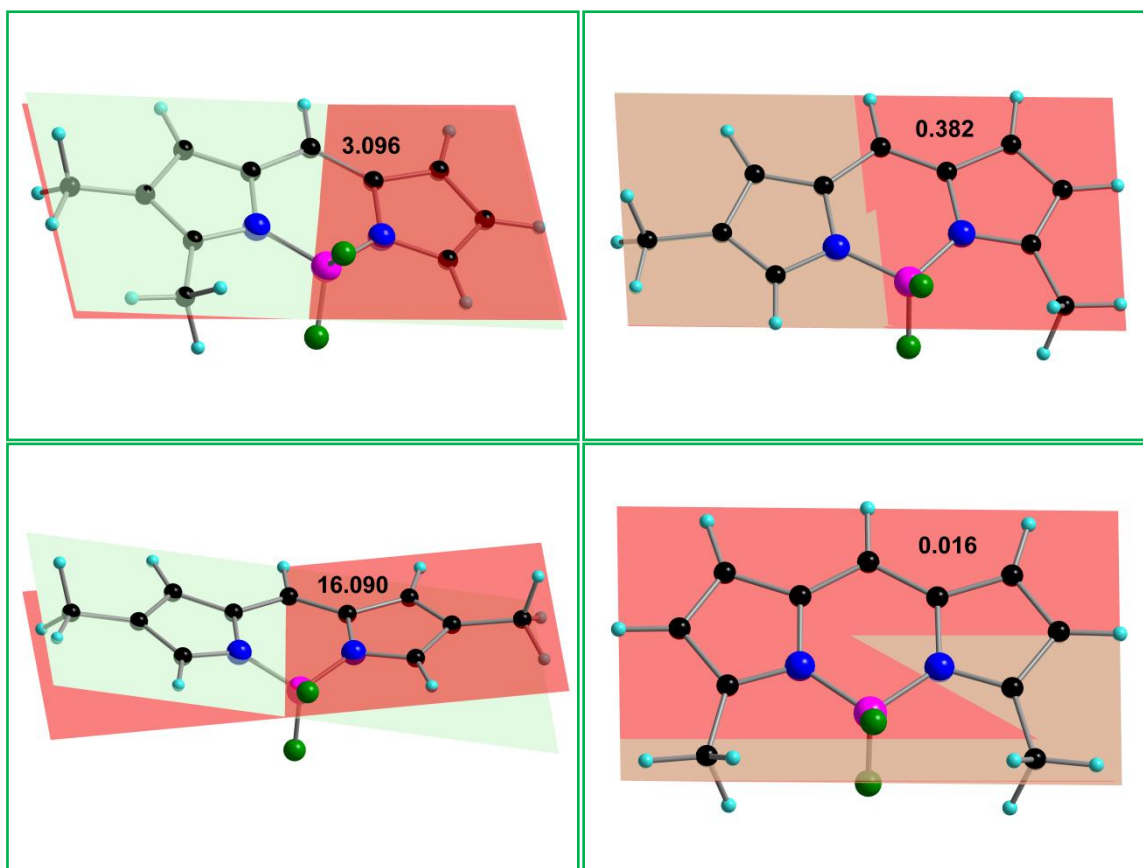

Figure S1-29: Dihedral arrangements between the two pyrrolic units in the DFT B3LYP/6-31G(d) optimised excited state structure of **2.01** to **2.12** respectively.

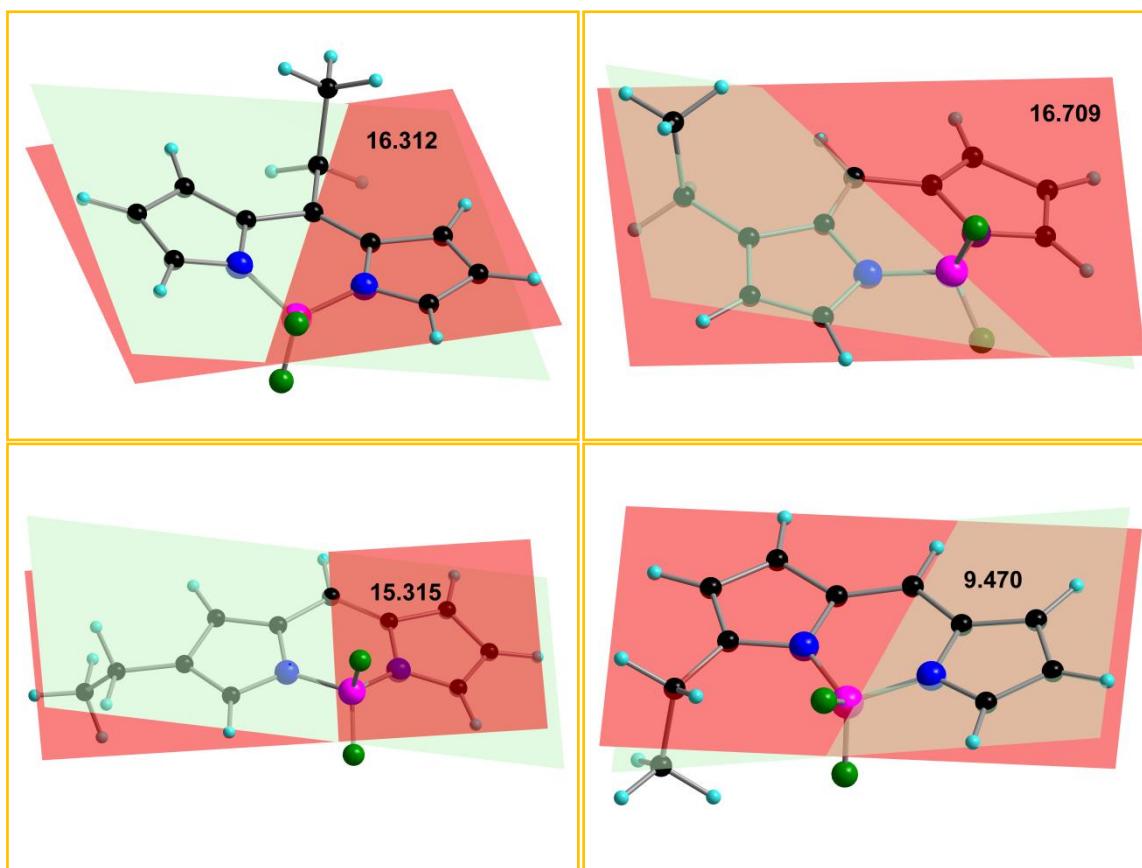

Figure S1-30: Dihedral arrangements between the two pyrrolic units in the DFT B3LYP/6-31G(d) optimised excited state structure of **3.01** to **3.04** respectively.

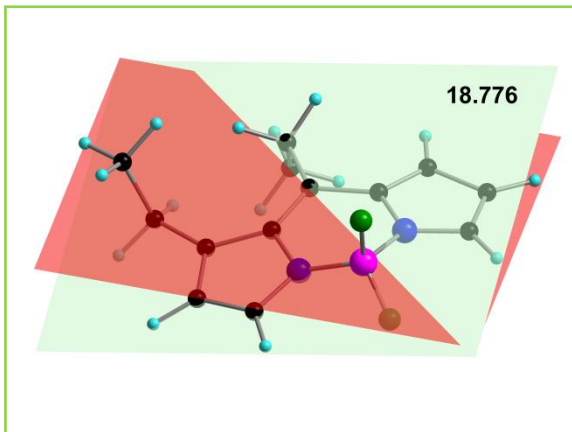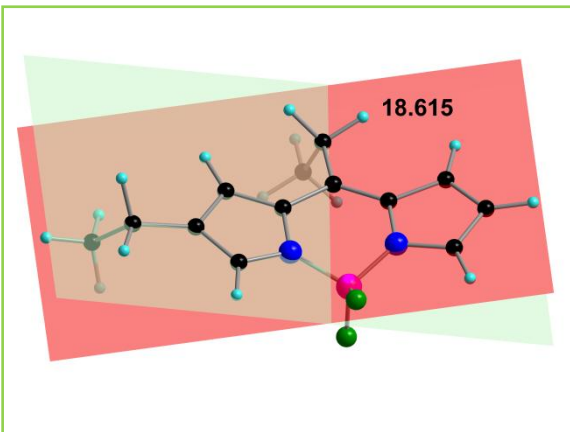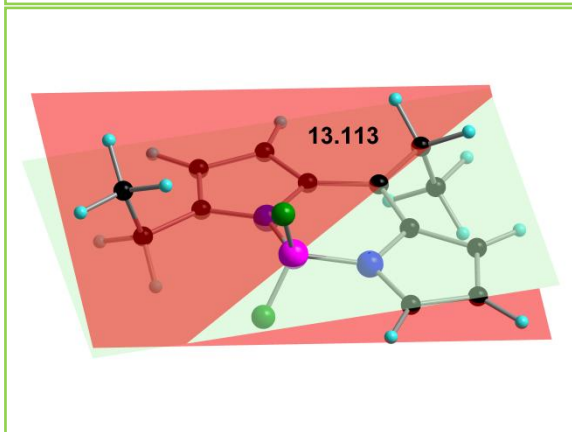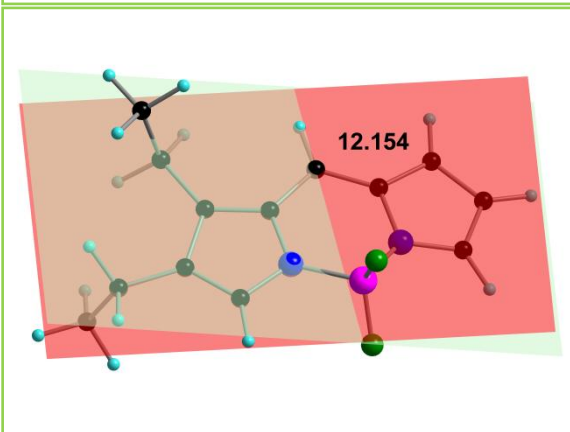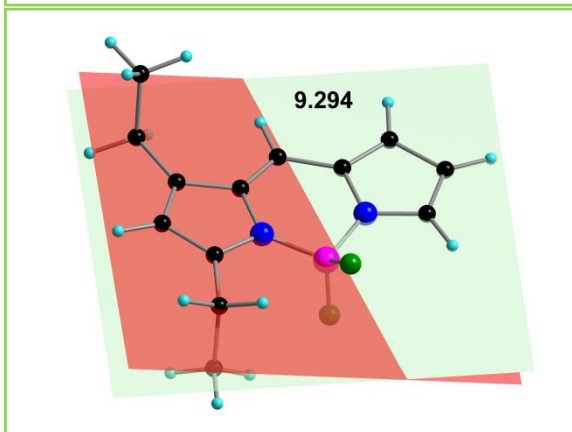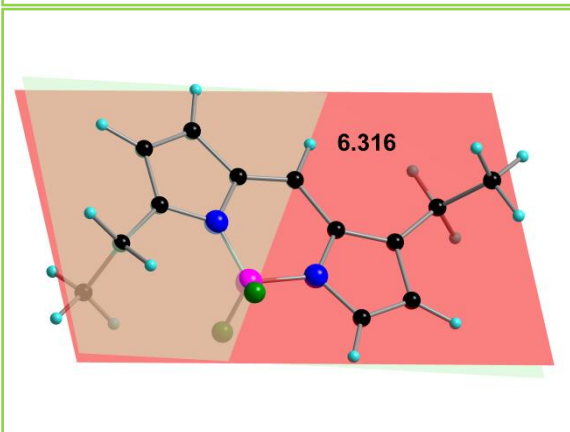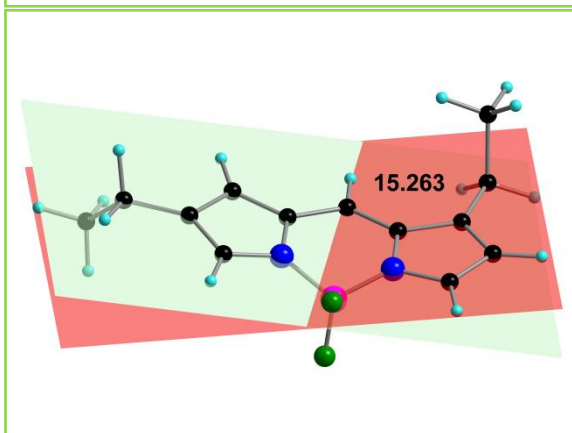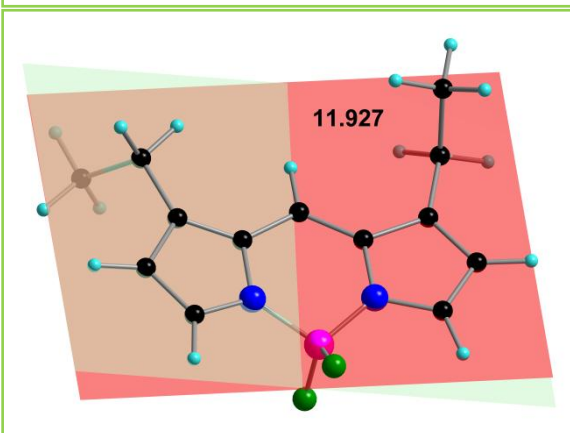

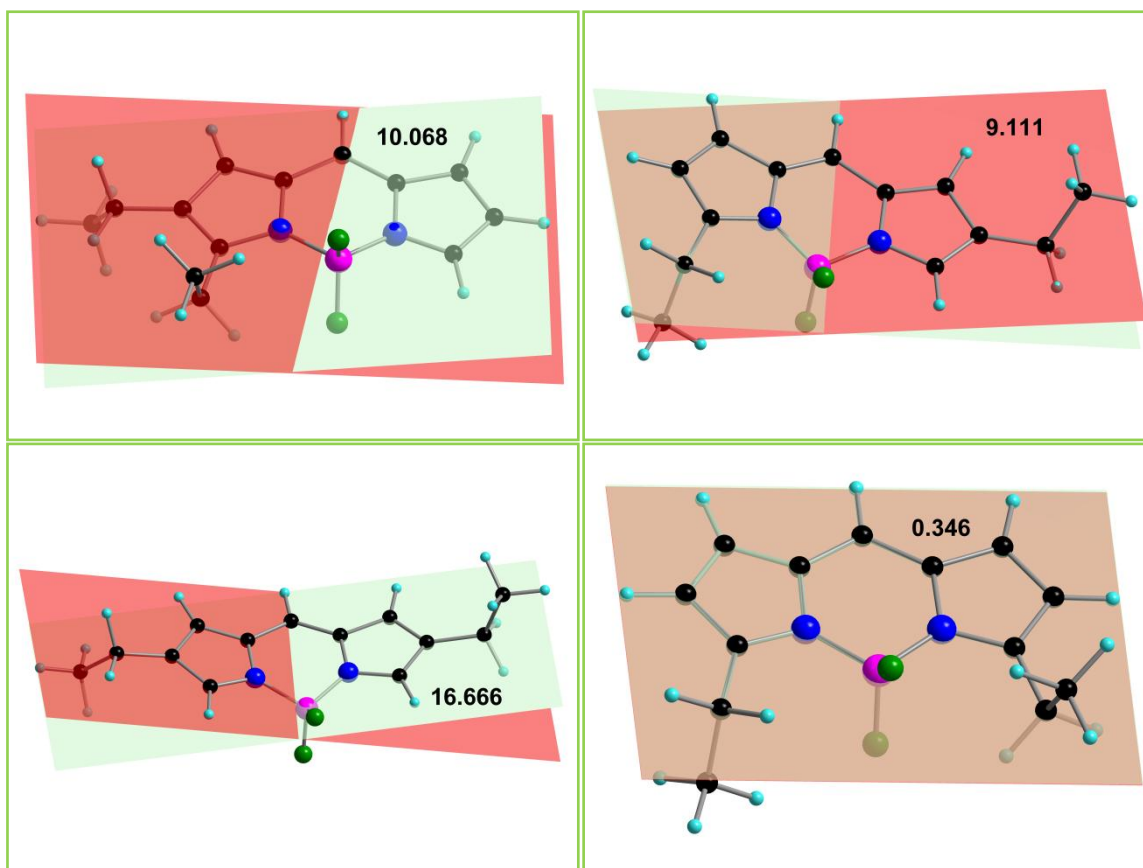

Figure S1-31: Dihedral arrangements between the two pyrrolic units in the DFT B3LYP/6-31G(d) optimised excited state structure of **4.01** to **4.12** respectively.

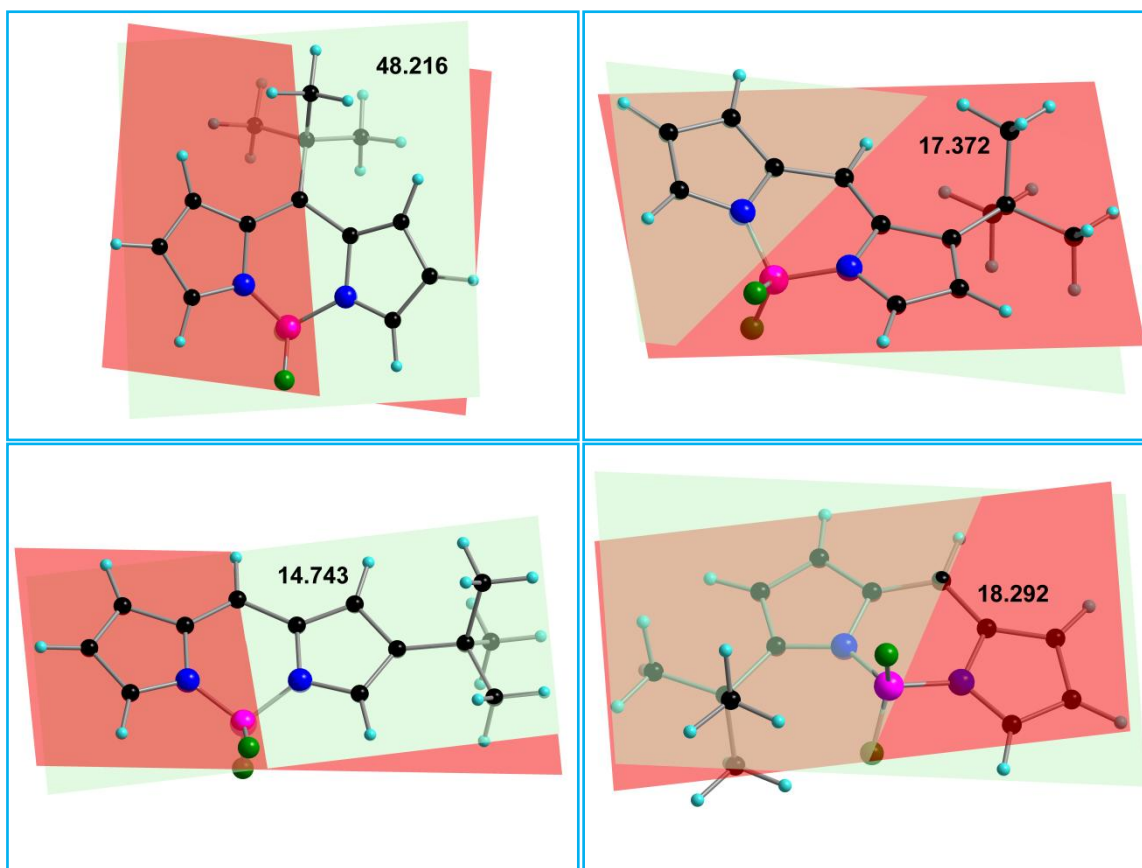

Figure S1-32: Dihedral arrangements between the two pyrrolic units in the DFT B3LYP/6-31G(d) optimised excited state structure of **5.01** to **5.04** respectively.

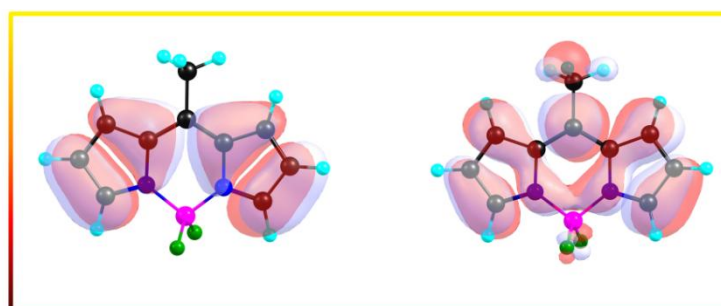

Figure S1-33: HOMO (left) and LUMO (right) of DFT B3LYP/6-31G(d) optimized structure of **1.01** (isovalue = 0.02).

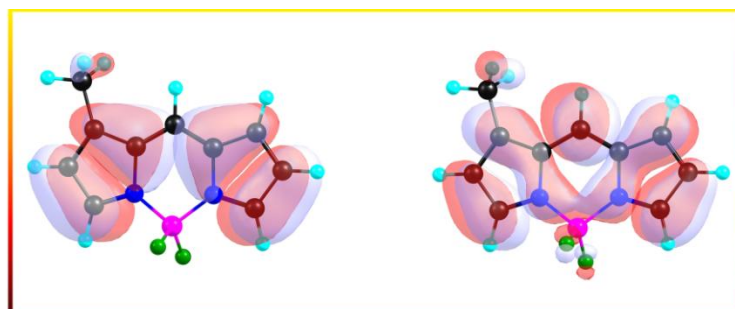

Figure S1-34: HOMO (left) and LUMO (right) of DFT B3LYP/6-31G(d) optimized structure of **1.02** (isovalue = 0.02).



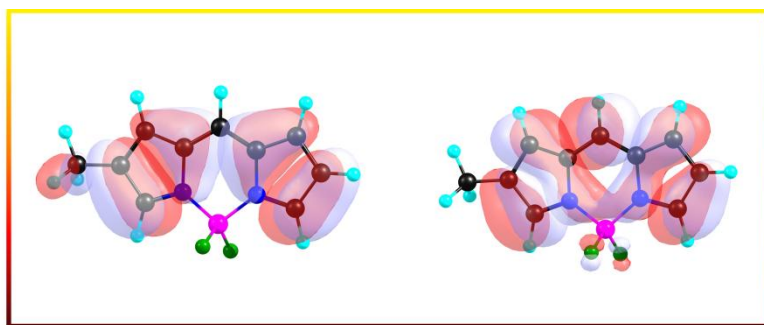

Figure S1-35: HOMO (left) and LUMO (right) of DFT B3LYP/6-31G(d) optimized structure of **1.03** (isovalue = 0.02).

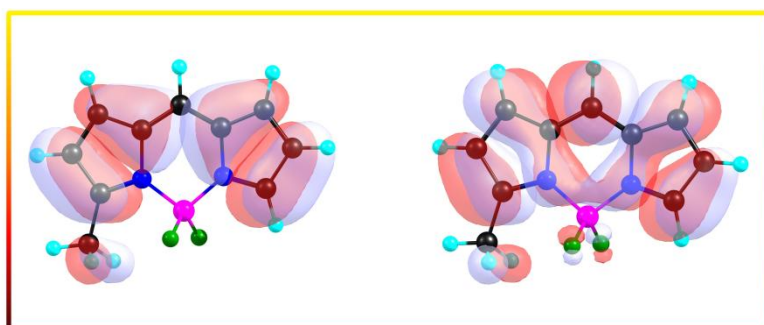

Figure S1-36: HOMO (left) and LUMO (right) of DFT B3LYP/6-31G(d) optimized structure of **1.04** (isovalue = 0.02).

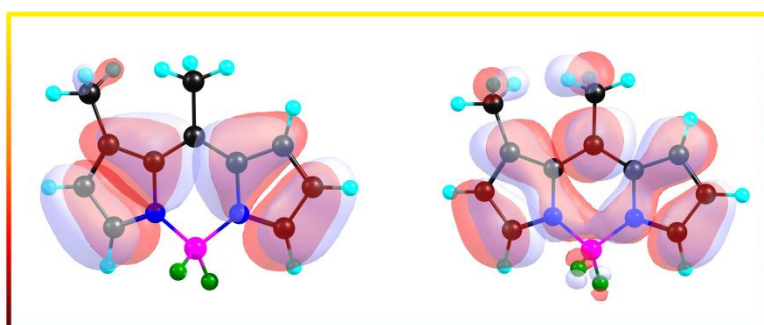

Figure S1-37: HOMO (left) and LUMO (right) of DFT B3LYP/6-31G(d) optimized structure of **2.01** (isovalue = 0.02).

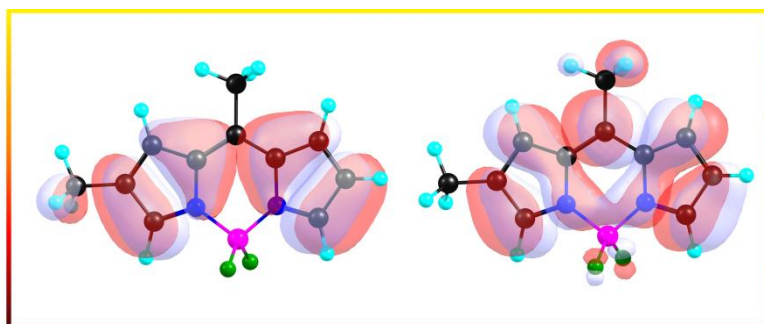

Figure S1-38: HOMO (left) and LUMO (right) of DFT B3LYP/6-31G(d) optimized structure of **2.02** (isovalue = 0.02).

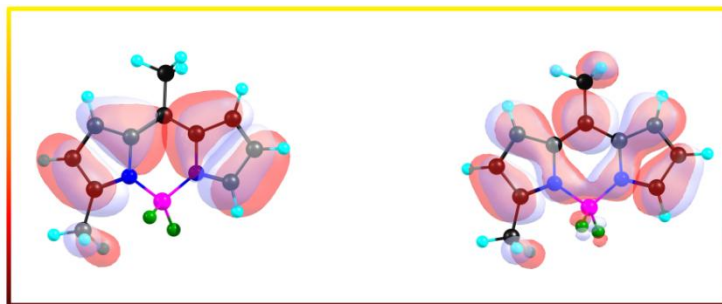

Figure S1-39: HOMO (left) and LUMO (right) of DFT B3LYP/6-31G(d) optimized structure of **2.03** (isovalue = 0.02).

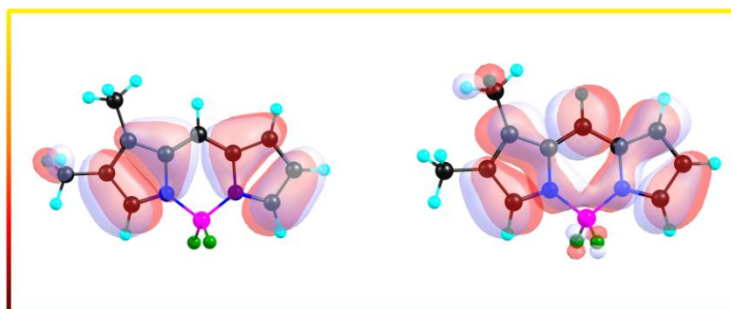

Figure S1-40: HOMO (left) and LUMO (right) of DFT B3LYP/6-31G(d) optimized structure of **2.04** (isovalue = 0.02).

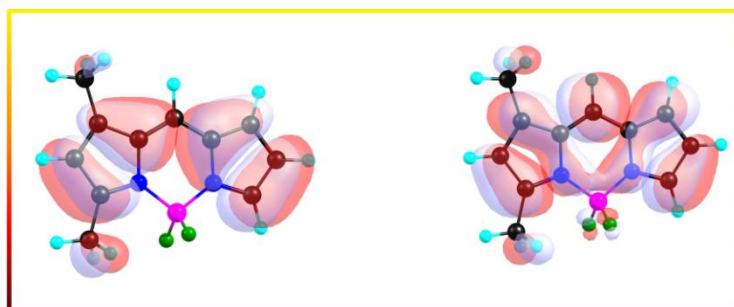

Figure S1-41: HOMO (left) and LUMO (right) of DFT B3LYP/6-31G(d) optimized structure of **2.05** (isovalue = 0.02).

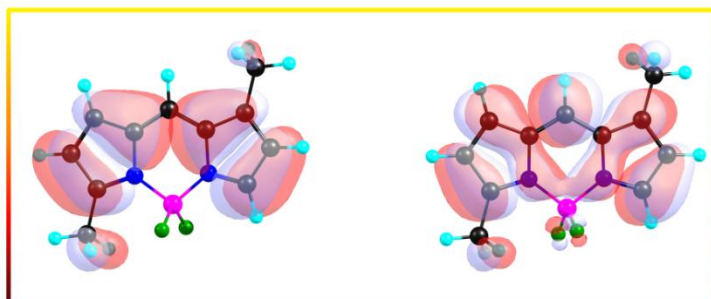

Figure S1-42: HOMO (left) and LUMO (right) of DFT B3LYP/6-31G(d) optimized structure of **2.06** (isovalue = 0.02).

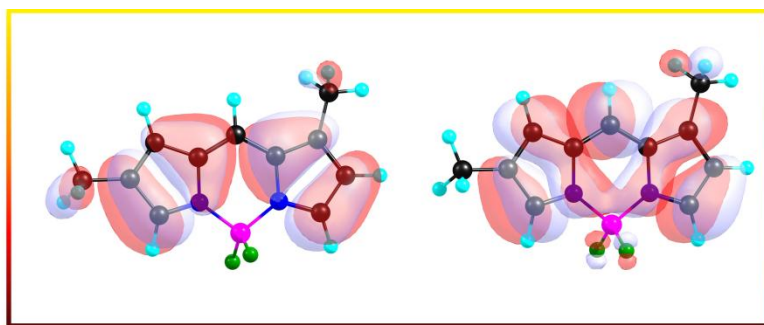

Figure S1-43: HOMO (left) and LUMO (right) of DFT B3LYP/6-31G(d) optimized structure of **2.07** (isovalue = 0.02).

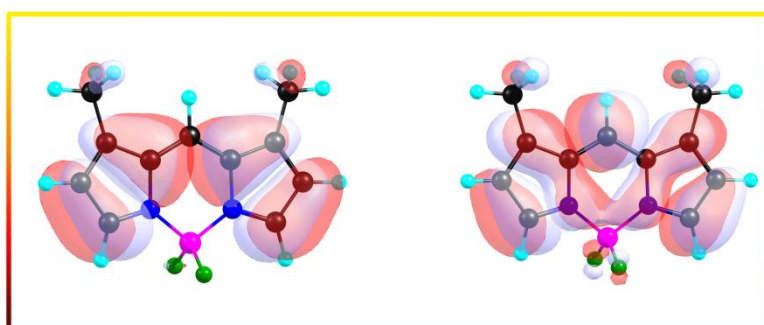

Figure S1-44: HOMO (left) and LUMO (right) of DFT B3LYP/6-31G(d) optimized structure of **2.08** (isovalue = 0.02).

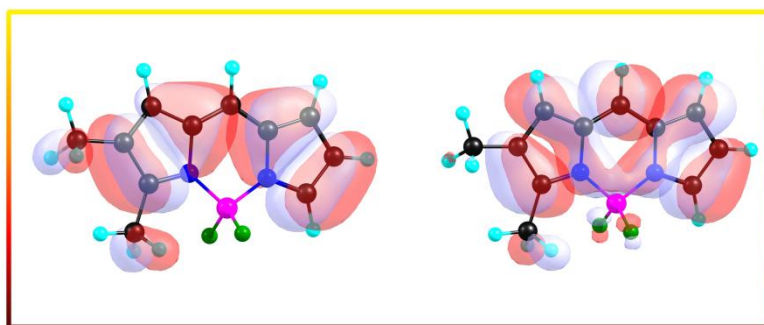

Figure S1-45: HOMO (left) and LUMO (right) of DFT B3LYP/6-31G(d) optimized structure of **2.09** (isovalue = 0.02).

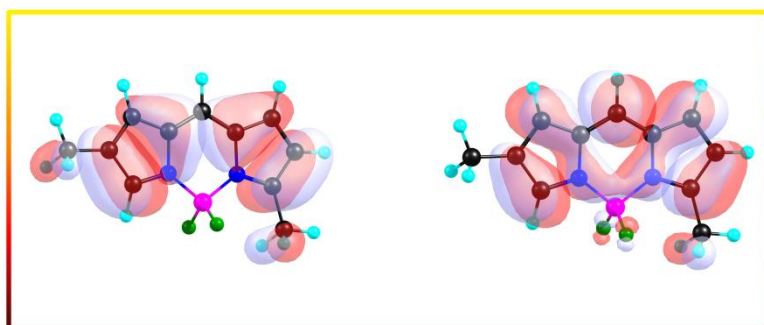

Figure S1-46: HOMO (left) and LUMO (right) of DFT B3LYP/6-31G(d) optimized structure of **2.10** (isovalue = 0.02).

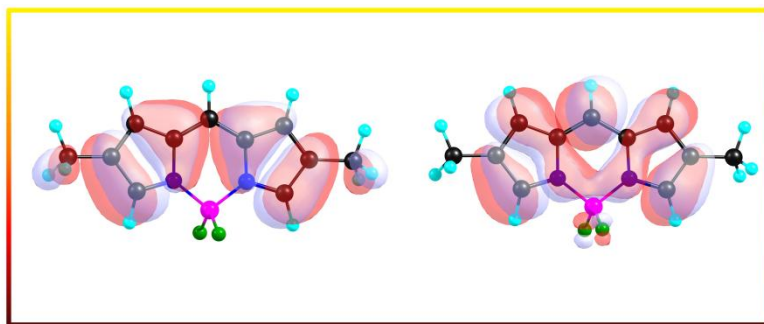

Figure S1-47: HOMO (left) and LUMO (right) of DFT B3LYP/6-31G(d) optimized structure of **2.11** (isovalue = 0.02).

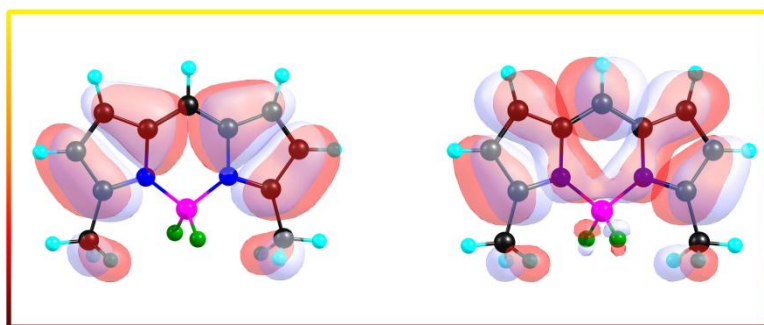

Figure S1-48: HOMO (left) and LUMO (right) of DFT B3LYP/6-31G(d) optimized structure of **2.12** (isovalue = 0.02).

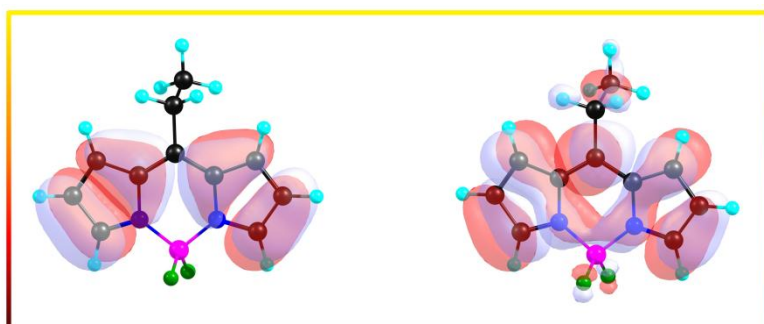

Figure S1-49: HOMO (left) and LUMO (right) of DFT B3LYP/6-31G(d) optimized structure of **3.01** (isovalue = 0.02).

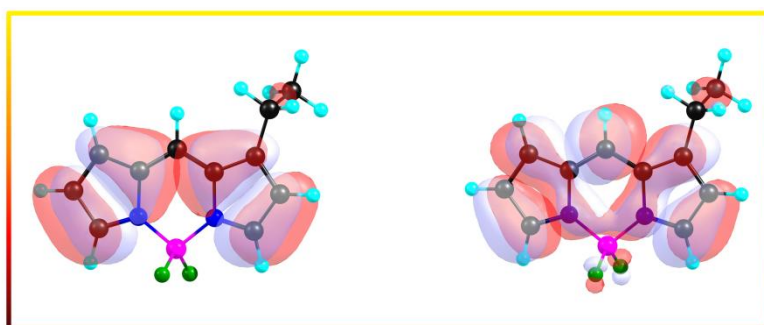

Figure S1-50: HOMO (left) and LUMO (right) of DFT B3LYP/6-31G(d) optimized structure of **3.02** (isovalue = 0.02).

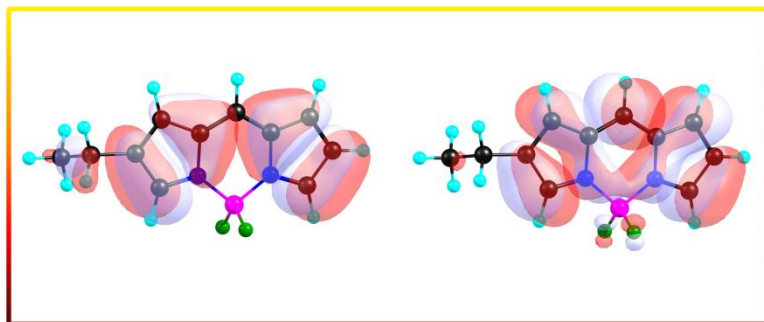

Figure S1-51: HOMO (left) and LUMO (right) of DFT B3LYP/6-31G(d) optimized structure of **3.03** (isovalue = 0.02).

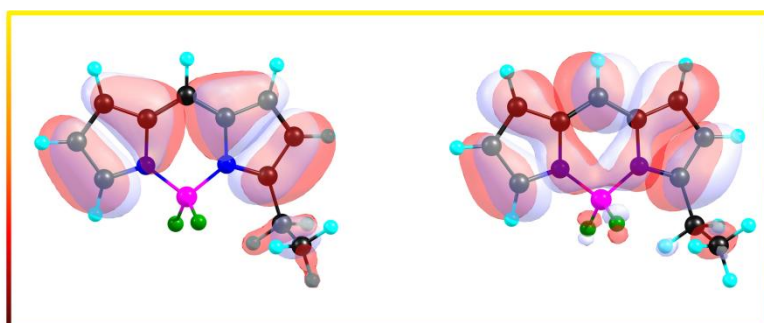

Figure S1-52: HOMO (left) and LUMO (right) of DFT B3LYP/6-31G(d) optimized structure of **3.04** (isovalue = 0.02).

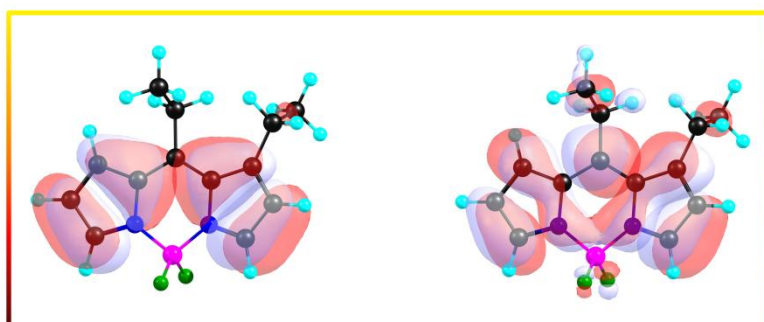

Figure S1-53: HOMO (left) and LUMO (right) of DFT B3LYP/6-31G(d) optimized structure of **4.01** (isovalue = 0.02).

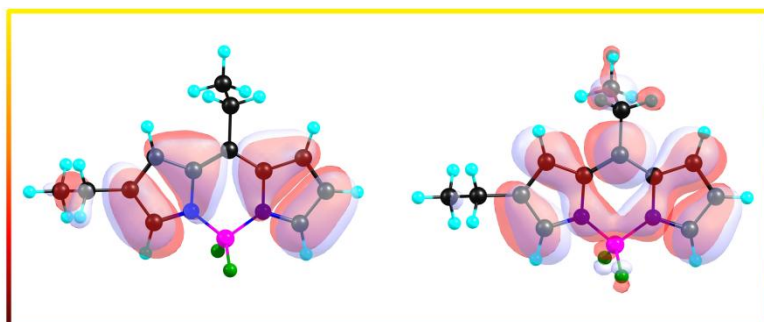

Figure S1-54: HOMO (left) and LUMO (right) of DFT B3LYP/6-31G(d) optimized structure of **4.02** (isovalue = 0.02).

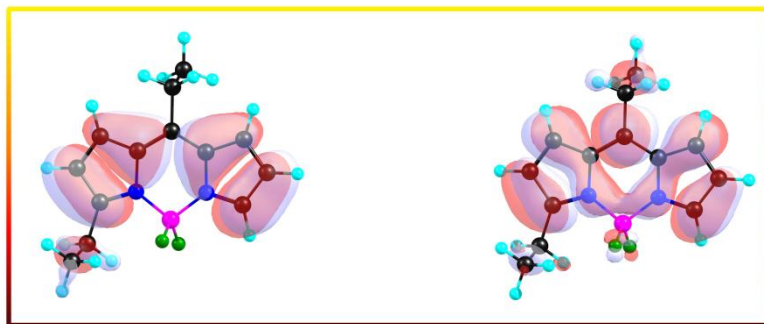

Figure S1-55: HOMO (left) and LUMO (right) of DFT B3LYP/6-31G(d) optimized structure of **4.03** (isovalue = 0.02).

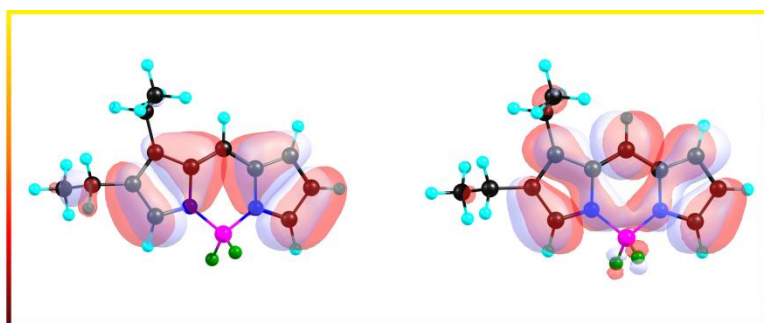

Figure S1-56: HOMO (left) and LUMO (right) of DFT B3LYP/6-31G(d) optimized structure of **4.04** (isovalue = 0.02).

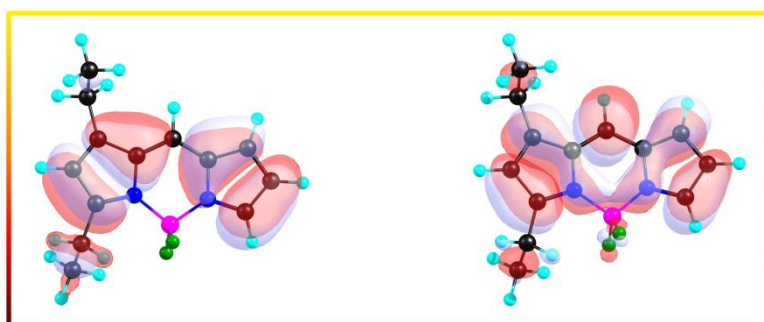

Figure S1-57: HOMO (left) and LUMO (right) of DFT B3LYP/6-31G(d) optimized structure of **4.05** (isovalue = 0.02).

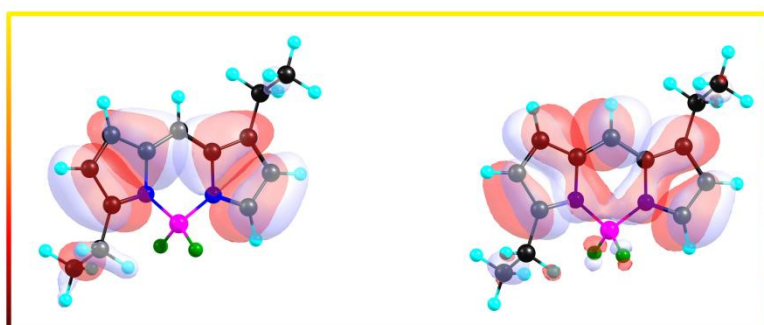

Figure S1-58: HOMO (left) and LUMO (right) of DFT B3LYP/6-31G(d) optimized structure of **4.06** (isovalue = 0.02).

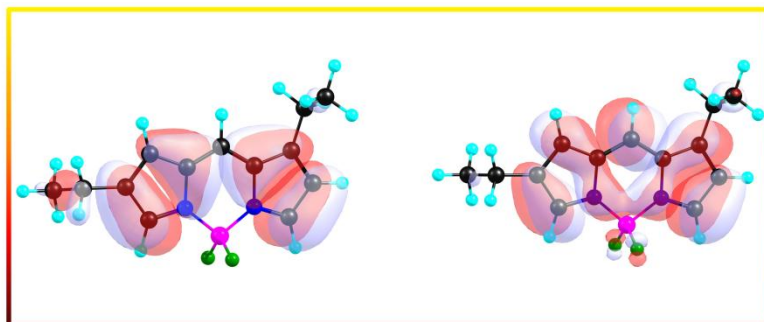

Figure S1-59: HOMO (left) and LUMO (right) of DFT B3LYP/6-31G(d) optimized structure of **4.07** (isovalue = 0.02).

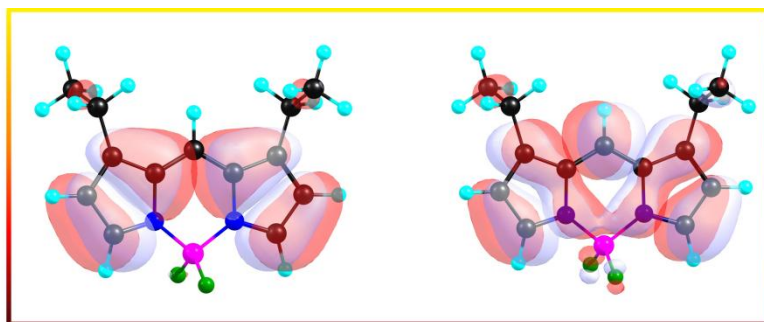

Figure S1-60: HOMO (left) and LUMO (right) of DFT B3LYP/6-31G(d) optimized structure of **4.08** (isovalue = 0.02).

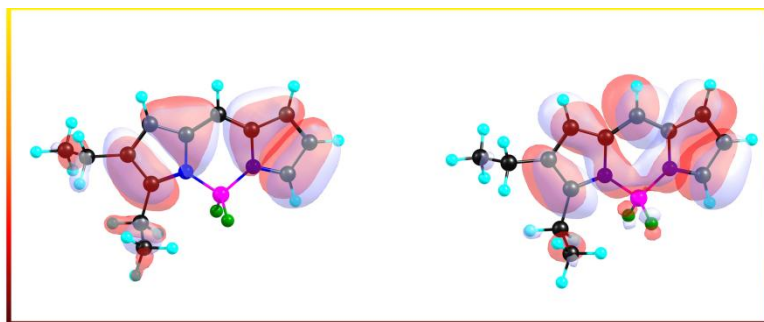

Figure S1-61: HOMO (left) and LUMO (right) of DFT B3LYP/6-31G(d) optimized structure of **4.09** (isovalue = 0.02).

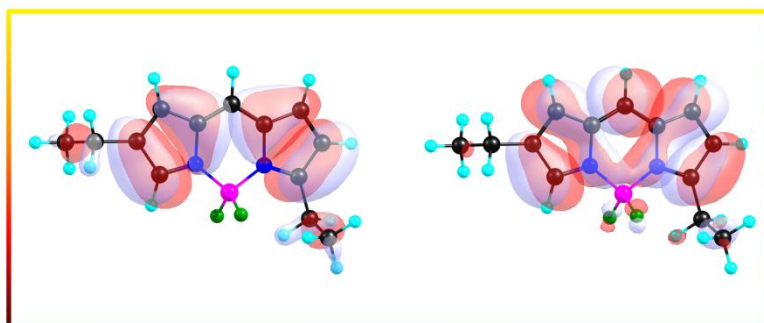

Figure S1-62: HOMO (left) and LUMO (right) of DFT B3LYP/6-31G(d) optimized structure of **4.10** (isovalue = 0.02).

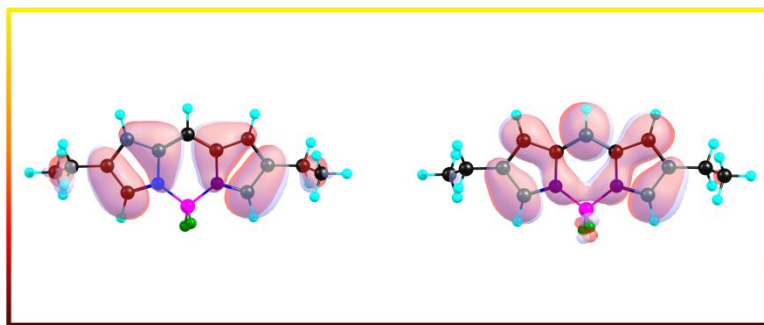

Figure S1-63: HOMO (left) and LUMO (right) of DFT B3LYP/6-31G(d) optimized structure of **4.11** (isovalue = 0.02).

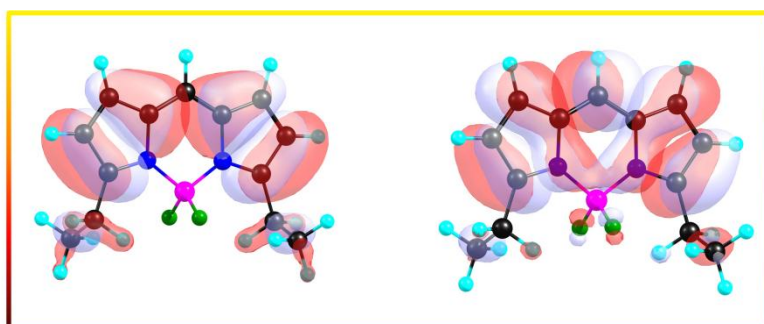

Figure S1-64: HOMO (left) and LUMO (right) of DFT B3LYP/6-31G(d) optimized structure of **4.12** (isovalue = 0.02).

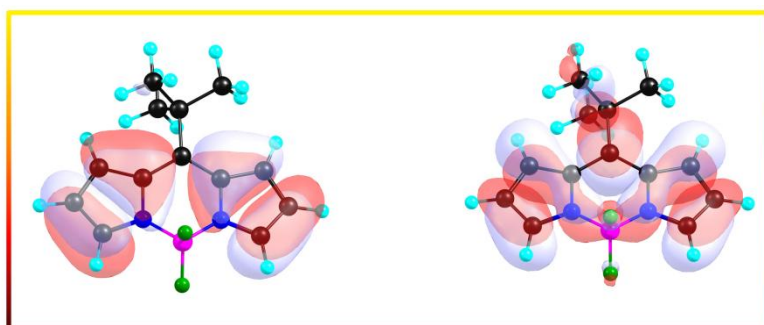

Figure S1-65: HOMO (left) and LUMO (right) of DFT B3LYP/6-31G(d) optimized structure of **5.01** (isovalue = 0.02).

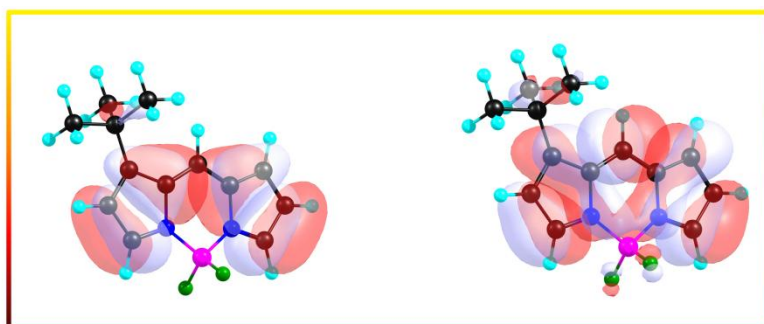

Figure S1-66: HOMO (left) and LUMO (right) of DFT B3LYP/6-31G(d) optimized structure of **5.02** (isovalue = 0.02).



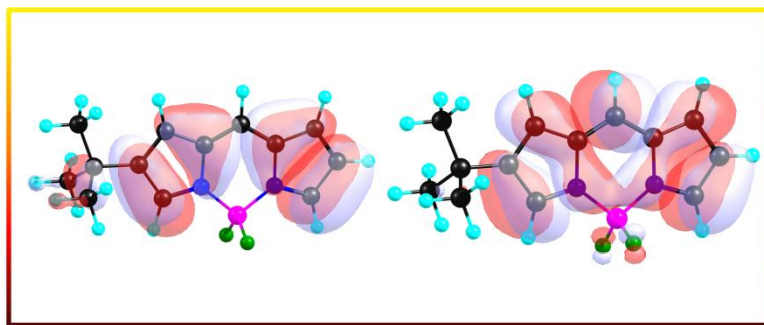

Figure S1-67: HOMO (left) and LUMO (right) of DFT B3LYP/6-31G(d) optimized structure of **5.03** (isovalue = 0.02).

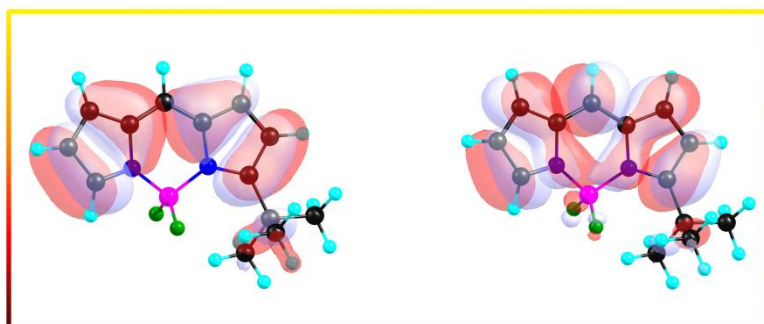

Figure S1-68: HOMO (left) and LUMO (right) of DFT B3LYP/6-31G(d) optimized structure of **5.04** (isovalue = 0.02).

|               | Total Energy (a.u.) | $\angle$ Py-Py( $^{\circ}$ ) | HOMO energy (a.u.) | LUMO energy (a.u.) |
|---------------|---------------------|------------------------------|--------------------|--------------------|
| <b>BODIPY</b> | -681.37581583       | 9.802                        | -0.21938           | -0.10462           |
| <b>1.01</b>   | -720.69470700       | 6.030                        | -0.21695           | -0.10090           |
| <b>1.02</b>   | -720.69566423       | 4.222                        | -0.21534           | -0.10101           |
| <b>1.03</b>   | -720.69481774       | 3.617                        | -0.21394           | -0.10118           |
| <b>1.04</b>   | -720.70049457       | 0.000                        | -0.21209           | -0.09958           |
| <b>2.01</b>   | -760.01168284       | 7.136                        | -0.21351           | -0.09622           |
| <b>2.02</b>   | -760.01356071       | 4.070                        | -0.21173           | -0.09759           |
| <b>2.03</b>   | -760.01901832       | 0.658                        | -0.21004           | -0.09619           |
| <b>2.04</b>   | -760.01438542       | 3.045                        | -0.21229           | -0.09861           |
| <b>2.05</b>   | -760.02038937       | 0.000                        | -0.20825           | -0.09598           |
| <b>2.06</b>   | -760.02010014       | 0.086                        | -0.20821           | -0.09630           |
| <b>2.07</b>   | -760.01451069       | 1.335                        | -0.21013           | -0.09784           |
| <b>2.08</b>   | -760.01525336       | 4.851                        | -0.21148           | -0.09769           |
| <b>2.09</b>   | -760.01920422       | 0.000                        | -0.20699           | -0.09608           |
| <b>2.10</b>   | -760.01928348       | 0.000                        | -0.20699           | -0.09649           |
| <b>2.11</b>   | -760.01365768       | 3.701                        | -0.20876           | -0.09799           |
| <b>2.12</b>   | -760.02463922       | 0.000                        | -0.20513           | -0.09514           |
| <b>3.01</b>   | -760.00812569       | 3.280                        | -0.21638           | -0.10060           |
| <b>3.02</b>   | -760.00896145       | 0.304                        | -0.21568           | -0.10093           |
| <b>3.03</b>   | -760.00824258       | 3.152                        | -0.21416           | -0.10151           |
| <b>3.04</b>   | -760.01458625       | 3.538                        | -0.21183           | -0.09927           |
| <b>4.01</b>   | -838.63607551       | 6.762                        | -0.21229           | -0.09717           |
| <b>4.02</b>   | -838.64042420       | 4.137                        | -0.21148           | -0.09772           |
| <b>4.03</b>   | -838.64643273       | 2.878                        | -0.20925           | -0.09579           |
| <b>4.04</b>   | -838.64041481       | 3.268                        | -0.21143           | -0.09836           |
| <b>4.05</b>   | -838.64775725       | 3.331                        | -0.20846           | -0.09574           |
| <b>4.06</b>   | -838.64750560       | 3.153                        | -0.20838           | -0.09602           |
| <b>4.07</b>   | -838.64124866       | 2.903                        | -0.21074           | -0.09816           |
| <b>4.08</b>   | -838.64187436       | 4.151                        | -0.21222           | -0.09755           |
| <b>4.09</b>   | -838.64619149       | 3.270                        | -0.20708           | -0.09630           |
| <b>4.10</b>   | -838.64682560       | 2.657                        | -0.20727           | -0.09677           |
| <b>4.11</b>   | -838.64053829       | 3.019                        | -0.20928           | -0.09867           |
| <b>4.12</b>   | -838.65252493       | 0.421                        | -0.20489           | -0.09474           |
| <b>5.01</b>   | -838.61639323       | 15.557                       | -0.21460           | -0.10076           |
| <b>5.02</b>   | -838.63241574       | 5.415                        | -0.21462           | -0.10034           |
| <b>5.03</b>   | -838.63466759       | 3.436                        | -0.21304           | -0.10061           |
| <b>5.04</b>   | -838.63374252       | 7.800                        | -0.21182           | -0.09927           |

**Table S1-1:** Computationally obtained data for the model BODIPY systems based on ground state B3LYP/6-31G(d) level of computations.

Tabular contents of properties of the model BODIPY dye systems:

Compound **BODIPY**

|                              | <b>Total Energy</b> | <b>HOMO energy</b> | <b>LUMO energy</b> |
|------------------------------|---------------------|--------------------|--------------------|
| <b>B3LYP/6-31G(d)</b>        | -681.37581583       | -0.21938           | -0.10462           |
| <b>B3LYP/6-31++G(d,p)</b>    | -681.26667659       | -0.22530           | -0.11618           |
| <b>mpw1pw91/6-31++G(d,p)</b> | -681.39543499       | -0.24103           | -0.11632           |
| <b>wb97xd/6-31++G(d,p)</b>   | -681.19566438       | -0.29497           | -0.05946           |

Compound **1.01**

|                              |               |          |          |
|------------------------------|---------------|----------|----------|
| <b>B3LYP/6-31G(d)</b>        | -720.69470700 | -0.21695 | -0.10090 |
| <b>B3LYP/6-31++G(d,p)</b>    | -720.89485029 | -0.23183 | -0.11695 |
| <b>mpw1pw91/6-31++G(d,p)</b> | -720.71559381 | -0.23856 | -0.11205 |
| <b>wb97xd/6-31++G(d,p)</b>   | -720.50871551 | -0.29323 | -0.05521 |

Compound **1.02**

|                              |               |          |          |
|------------------------------|---------------|----------|----------|
| <b>B3LYP/6-31G(d)</b>        | -720.69566423 | -0.21534 | -0.10101 |
| <b>B3LYP/6-31++G(d,p)</b>    | -720.89554958 | -0.22981 | -0.11714 |
| <b>mpw1pw91/6-31++G(d,p)</b> | -720.71587167 | -0.23636 | -0.11231 |
| <b>wb97xd/6-31++G(d,p)</b>   | -720.50769694 | -0.29049 | -0.05556 |

Compound **1.03**

|                              |               |          |          |
|------------------------------|---------------|----------|----------|
| <b>B3LYP/6-31G(d)</b>        | -720.69481774 | -0.21394 | -0.10118 |
| <b>B3LYP/6-31++G(d,p)</b>    | -720.89462456 | -0.22812 | -0.11710 |
| <b>mpw1pw91/6-31++G(d,p)</b> | -720.71477904 | -0.23463 | -0.11226 |
| <b>wb97xd/6-31++G(d,p)</b>   | -720.50573162 | -0.28874 | -0.05570 |

Compound **1.04**

|                           |               |          |          |
|---------------------------|---------------|----------|----------|
| <b>B3LYP/6-31G(d)</b>     | -720.70049457 | -0.21209 | -0.09958 |
| <b>B3LYP/6-31++G(d,p)</b> | -720.89987239 | -0.22629 | -0.11500 |

---

|                              |               |          |          |
|------------------------------|---------------|----------|----------|
| <b>mpw1pw91/6-31++G(d,p)</b> | -720.72022834 | -0.23266 | -0.11018 |
| <b>wb97xd/6-31++G(d,p)</b>   | -720.51227658 | -0.28638 | -0.05375 |

---

Compound 2.01

---

|                              |               |          |          |
|------------------------------|---------------|----------|----------|
| <b>B3LYP/6-31G(d)</b>        | -760.01168284 | -0.21351 | -0.09622 |
| <b>B3LYP/6-31++G(d,p)</b>    | -760.22133822 | -0.22798 | -0.11165 |
| <b>mpw1pw91/6-31++G(d,p)</b> | -760.03312358 | -0.23464 | -0.10667 |
| <b>wb97xd/6-31++G(d,p)</b>   | -759.81880897 | -0.28948 | -0.04988 |

---

Compound 2.02

---

|                              |               |          |          |
|------------------------------|---------------|----------|----------|
| <b>B3LYP/6-31G(d)</b>        | -760.01356071 | -0.21173 | -0.09759 |
| <b>B3LYP/6-31++G(d,p)</b>    | -760.22325744 | -0.22575 | -0.11314 |
| <b>mpw1pw91/6-31++G(d,p)</b> | -760.03476957 | -0.23233 | -0.10821 |
| <b>wb97xd/6-31++G(d,p)</b>   | -759.81868995 | -0.28712 | -0.05164 |

---

Compound 2.03

---

|                              |               |          |          |
|------------------------------|---------------|----------|----------|
| <b>B3LYP/6-31G(d)</b>        | -760.01901832 | -0.21004 | -0.09619 |
| <b>B3LYP/6-31++G(d,p)</b>    | -760.22822505 | -0.22410 | -0.11123 |
| <b>mpw1pw91/6-31++G(d,p)</b> | -760.03993235 | -0.23056 | -0.10632 |
| <b>wb97xd/6-31++G(d,p)</b>   | -759.82480619 | -0.28493 | -0.04980 |

---

Compound 2.04

---

|                              |               |          |          |
|------------------------------|---------------|----------|----------|
| <b>B3LYP/6-31G(d)</b>        | -760.01438542 | -0.21229 | -0.09861 |
| <b>B3LYP/6-31++G(d,p)</b>    | -760.22377080 | -0.22615 | -0.11408 |
| <b>mpw1pw91/6-31++G(d,p)</b> | -760.03498961 | -0.23268 | -0.10927 |
| <b>wb97xd/6-31++G(d,p)</b>   | -759.81836911 | -0.28674 | -0.05276 |

---

Compound 2.05

---

|                       |               |          |          |
|-----------------------|---------------|----------|----------|
| <b>B3LYP/6-31G(d)</b> | -760.02038937 | -0.20825 | -0.09598 |
|-----------------------|---------------|----------|----------|

---

---

|                              |               |          |          |
|------------------------------|---------------|----------|----------|
| <b>B3LYP/6-31++G(d,p)</b>    | -760.22935066 | -0.22198 | -0.11099 |
| <b>mpw1pw91/6-31++G(d,p)</b> | -760.04065560 | -0.22826 | -0.10612 |
| <b>wb97xd/6-31++G(d,p)</b>   | -759.82450027 | -0.28231 | -0.04975 |

---

Compound 2.06

---

|                              |               |          |          |
|------------------------------|---------------|----------|----------|
| <b>B3LYP/6-31G(d)</b>        | -760.02010014 | -0.20821 | -0.09630 |
| <b>B3LYP/6-31++G(d,p)</b>    | -760.22898113 | -0.22185 | -0.11139 |
| <b>mpw1pw91/6-31++G(d,p)</b> | -760.04026932 | -0.22813 | -0.10652 |
| <b>wb97xd/6-31++G(d,p)</b>   | -759.82383889 | -0.28187 | -0.05035 |

---

Compound 2.07

---

|                              |               |          |          |
|------------------------------|---------------|----------|----------|
| <b>B3LYP/6-31G(d)</b>        | -760.01451069 | -0.21013 | -0.09784 |
| <b>B3LYP/6-31++G(d,p)</b>    | -760.22386553 | -0.22376 | -0.11341 |
| <b>mpw1pw91/6-31++G(d,p)</b> | -760.03497013 | -0.23017 | -0.10854 |
| <b>wb97xd/6-31++G(d,p)</b>   | -759.81764957 | -0.28431 | -0.05215 |

---

Compound 2.08

---

|                              |               |          |          |
|------------------------------|---------------|----------|----------|
| <b>B3LYP/6-31G(d)</b>        | -760.01525336 | -0.21148 | -0.09769 |
| <b>B3LYP/6-31++G(d,p)</b>    | -760.22460896 | -0.22538 | -0.11354 |
| <b>mpw1pw91/6-31++G(d,p)</b> | -760.03588934 | -0.23185 | -0.10864 |
| <b>wb97xd/6-31++G(d,p)</b>   | -759.81933699 | -0.28606 | -0.05211 |

---

Compound 2.09

---

|                              |               |          |          |
|------------------------------|---------------|----------|----------|
| <b>B3LYP/6-31G(d)</b>        | -760.01920422 | -0.20699 | -0.09608 |
| <b>B3LYP/6-31++G(d,p)</b>    | -760.22803464 | -0.22053 | -0.11100 |
| <b>mpw1pw91/6-31++G(d,p)</b> | -760.03936920 | -0.22678 | -0.10612 |
| <b>wb97xd/6-31++G(d,p)</b>   | -759.82288714 | -0.28057 | -0.04975 |

---

Compound 2.10

---

|                              |               |          |          |
|------------------------------|---------------|----------|----------|
| <b>B3LYP/6-31G(d)</b>        | -760.01928348 | -0.20699 | -0.09649 |
| <b>B3LYP/6-31++G(d,p)</b>    | -760.22808879 | -0.22038 | -0.11138 |
| <b>mpw1pw91/6-31++G(d,p)</b> | -760.03920939 | -0.22662 | -0.10653 |
| <b>wb97xd/6-31++G(d,p)</b>   | -759.82197608 | -0.28043 | -0.05049 |

---

Compound 2.11

---

|                              |               |          |          |
|------------------------------|---------------|----------|----------|
| <b>B3LYP/6-31G(d)</b>        | -760.01365768 | -0.20876 | -0.09799 |
| <b>B3LYP/6-31++G(d,p)</b>    | -760.22290104 | -0.22214 | -0.11338 |
| <b>mpw1pw91/6-31++G(d,p)</b> | -760.03381861 | -0.22852 | -0.10851 |
| <b>wb97xd/6-31++G(d,p)</b>   | -759.81548510 | -0.28270 | -0.05224 |

---

Compound 2.12

---

|                              |               |          |          |
|------------------------------|---------------|----------|----------|
| <b>B3LYP/6-31G(d)</b>        | -760.02463922 | -0.20513 | -0.09514 |
| <b>B3LYP/6-31++G(d,p)</b>    | -760.23293660 | -0.21852 | -0.10956 |
| <b>mpw1pw91/6-31++G(d,p)</b> | -760.04424590 | -0.22462 | -0.10473 |
| <b>wb97xd/6-31++G(d,p)</b>   | -759.82787705 | -0.27802 | -0.04890 |

---

Compound 3.01

---

|                              |               |          |          |
|------------------------------|---------------|----------|----------|
| <b>B3LYP/6-31G(d)</b>        | -760.00812569 | -0.21638 | -0.10060 |
| <b>B3LYP/6-31++G(d,p)</b>    | -760.21860738 | -0.23089 | -0.11640 |
| <b>mpw1pw91/6-31++G(d,p)</b> | -760.02999611 | -0.23764 | -0.11152 |
| <b>wb97xd/6-31++G(d,p)</b>   | -759.81568507 | -0.29231 | -0.05469 |

---

Compound 3.02

---

|                              |               |          |          |
|------------------------------|---------------|----------|----------|
| <b>B3LYP/6-31G(d)</b>        | -760.00896145 | -0.21568 | -0.10093 |
| <b>B3LYP/6-31++G(d,p)</b>    | -760.21932590 | -0.23003 | -0.11682 |
| <b>mpw1pw91/6-31++G(d,p)</b> | -760.03014269 | -0.23658 | -0.11200 |
| <b>wb97xd/6-31++G(d,p)</b>   | -759.81424339 | -0.29042 | -0.05541 |

---

## Compound 3.03

|                              |               |          |          |
|------------------------------|---------------|----------|----------|
| <b>B3LYP/6-31G(d)</b>        | -760.00824258 | -0.21416 | -0.10151 |
| <b>B3LYP/6-31++G(d,p)</b>    | -760.21862760 | -0.22827 | -0.11722 |
| <b>mpw1pw91/6-31++G(d,p)</b> | -760.02924994 | -0.23476 | -0.11235 |
| <b>wb97xd/6-31++G(d,p)</b>   | -759.81179377 | -0.28883 | -0.05586 |

## Compound 3.04

|                              |               |          |          |
|------------------------------|---------------|----------|----------|
| <b>B3LYP/6-31G(d)</b>        | -760.01458625 | -0.21183 | -0.09927 |
| <b>B3LYP/6-31++G(d,p)</b>    | -760.22331059 | -0.22550 | -0.11406 |
| <b>mpw1pw91/6-31++G(d,p)</b> | -760.03413831 | -0.23187 | -0.10914 |
| <b>wb97xd/6-31++G(d,p)</b>   | -759.81814288 | -0.28565 | -0.05286 |

## Compound 4.01

|                              |               |          |          |
|------------------------------|---------------|----------|----------|
| <b>B3LYP/6-31G(d)</b>        | -838.63607551 | -0.21229 | -0.09717 |
| <b>B3LYP/6-31++G(d,p)</b>    | -838.86653376 | -0.22709 | -0.11239 |
| <b>mpw1pw91/6-31++G(d,p)</b> | -838.65976792 | -0.23374 | -0.10741 |
| <b>wb97xd/6-31++G(d,p)</b>   | -838.43088467 | -0.28850 | -0.05073 |

## Compound 4.02

|                              |               |          |          |
|------------------------------|---------------|----------|----------|
| <b>B3LYP/6-31G(d)</b>        | -838.64042420 | -0.21148 | -0.09772 |
| <b>B3LYP/6-31++G(d,p)</b>    | -838.87098321 | -0.22513 | -0.11286 |
| <b>mpw1pw91/6-31++G(d,p)</b> | -838.66362283 | -0.23166 | -0.10787 |
| <b>wb97xd/6-31++G(d,p)</b>   | -838.43173634 | -0.28865 | -0.05167 |

## Compound 4.03

|                              |               |          |          |
|------------------------------|---------------|----------|----------|
| <b>B3LYP/6-31G(d)</b>        | -838.64643273 | -0.20925 | -0.09579 |
| <b>B3LYP/6-31++G(d,p)</b>    | -838.87528255 | -0.22248 | -0.11001 |
| <b>mpw1pw91/6-31++G(d,p)</b> | -838.66811312 | -0.22895 | -0.10502 |
| <b>wb97xd/6-31++G(d,p)</b>   | -838.43789071 | -0.28342 | -0.04874 |

## Compound 4.04

|                              |               |          |          |
|------------------------------|---------------|----------|----------|
| <b>B3LYP/6-31G(d)</b>        | -838.64041481 | -0.21143 | -0.09836 |
| <b>B3LYP/6-31++G(d,p)</b>    | -838.87081872 | -0.22496 | -0.11347 |
| <b>mpw1pw91/6-31++G(d,p)</b> | -838.66319771 | -0.23142 | -0.10858 |
| <b>wb97xd/6-31++G(d,p)</b>   | -838.43104316 | -0.28574 | -0.05232 |

## Compound 4.05

|                              |               |          |          |
|------------------------------|---------------|----------|----------|
| <b>B3LYP/6-31G(d)</b>        | -838.64775725 | -0.20846 | -0.09574 |
| <b>B3LYP/6-31++G(d,p)</b>    | -838.87653314 | -0.22157 | -0.10995 |
| <b>mpw1pw91/6-31++G(d,p)</b> | -838.66887128 | -0.22785 | -0.10498 |
| <b>wb97xd/6-31++G(d,p)</b>   | -838.43694677 | -0.28182 | -0.04883 |

## Compound 4.06

|                              |               |          |          |
|------------------------------|---------------|----------|----------|
| <b>B3LYP/6-31G(d)</b>        | -838.64750560 | -0.20838 | -0.09602 |
| <b>B3LYP/6-31++G(d,p)</b>    | -838.87620791 | -0.22146 | -0.11033 |
| <b>mpw1pw91/6-31++G(d,p)</b> | -838.66847760 | -0.22768 | -0.10537 |
| <b>wb97xd/6-31++G(d,p)</b>   | -838.43595855 | -0.28123 | -0.04940 |

## Compound 4.07

|                              |               |          |          |
|------------------------------|---------------|----------|----------|
| <b>B3LYP/6-31G(d)</b>        | -838.64124866 | -0.21074 | -0.09816 |
| <b>B3LYP/6-31++G(d,p)</b>    | -838.87163249 | -0.22436 | -0.11345 |
| <b>mpw1pw91/6-31++G(d,p)</b> | -838.66371363 | -0.23075 | -0.10855 |
| <b>wb97xd/6-31++G(d,p)</b>   | -838.42999260 | -0.28429 | -0.05206 |

## Compound 4.08

|                              |               |          |          |
|------------------------------|---------------|----------|----------|
| <b>B3LYP/6-31G(d)</b>        | -838.64187436 | -0.21222 | -0.09755 |
| <b>B3LYP/6-31++G(d,p)</b>    | -838.87220079 | -0.22598 | -0.11292 |
| <b>mpw1pw91/6-31++G(d,p)</b> | -838.66451109 | -0.23242 | -0.10806 |



---

|                            |               |          |          |
|----------------------------|---------------|----------|----------|
| <b>wb97xd/6-31++G(d,p)</b> | -838.43199723 | -0.28600 | -0.05183 |
|----------------------------|---------------|----------|----------|

---

Compound 4.09

---

|                              |               |          |          |
|------------------------------|---------------|----------|----------|
| <b>B3LYP/6-31G(d)</b>        | -838.64619149 | -0.20708 | -0.09630 |
| <b>B3LYP/6-31++G(d,p)</b>    | -838.87493086 | -0.22021 | -0.11061 |
| <b>mpw1pw91/6-31++G(d,p)</b> | -838.66733261 | -0.22649 | -0.10570 |
| <b>wb97xd/6-31++G(d,p)</b>   | -838.43579651 | -0.28014 | -0.04941 |

---

Compound 4.10

---

|                              |               |          |          |
|------------------------------|---------------|----------|----------|
| <b>B3LYP/6-31G(d)</b>        | -838.64682560 | -0.20727 | -0.09677 |
| <b>B3LYP/6-31++G(d,p)</b>    | -838.87558395 | -0.22013 | -0.11090 |
| <b>mpw1pw91/6-31++G(d,p)</b> | -838.66763929 | -0.22630 | -0.10590 |
| <b>wb97xd/6-31++G(d,p)</b>   | -838.43405198 | -0.27966 | -0.04962 |

---

Compound 4.11

---

|                              |               |          |          |
|------------------------------|---------------|----------|----------|
| <b>B3LYP/6-31G(d)</b>        | -838.64053829 | -0.20928 | -0.09867 |
| <b>B3LYP/6-31++G(d,p)</b>    | -838.87088395 | -0.22250 | -0.11364 |
| <b>mpw1pw91/6-31++G(d,p)</b> | -838.66272957 | -0.22885 | -0.10872 |
| <b>wb97xd/6-31++G(d,p)</b>   | -838.42762167 | -0.28296 | -0.05258 |

---

Compound 4.12

---

|                              |               |          |          |
|------------------------------|---------------|----------|----------|
| <b>B3LYP/6-31G(d)</b>        | -838.65252493 | -0.20489 | -0.09474 |
| <b>B3LYP/6-31++G(d,p)</b>    | -838.87973813 | -0.21730 | -0.10800 |
| <b>mpw1pw91/6-31++G(d,p)</b> | -838.67199098 | -0.22336 | -0.10297 |
| <b>wb97xd/6-31++G(d,p)</b>   | -838.43967539 | -0.27675 | -0.04730 |

---

Compound 5.01

---

|                           |               |          |          |
|---------------------------|---------------|----------|----------|
| <b>B3LYP/6-31G(d)</b>     | -838.61639323 | -0.21460 | -0.10076 |
| <b>B3LYP/6-31++G(d,p)</b> | -838.84698078 | -0.22891 | -0.11590 |

---

---

|                              |               |          |          |
|------------------------------|---------------|----------|----------|
| <b>mpw1pw91/6-31++G(d,p)</b> | -838.64129378 | -0.23561 | -0.11105 |
| <b>wb97xd/6-31++G(d,p)</b>   | -838.41363750 | -0.29035 | -0.05421 |

---

Compound 5.02

---

|                              |               |          |          |
|------------------------------|---------------|----------|----------|
| <b>B3LYP/6-31G(d)</b>        | -838.63241574 | -0.21462 | -0.10034 |
| <b>B3LYP/6-31++G(d,p)</b>    | -838.86346710 | -0.22878 | -0.11600 |
| <b>mpw1pw91/6-31++G(d,p)</b> | -838.65670777 | -0.23532 | -0.11121 |
| <b>wb97xd/6-31++G(d,p)</b>   | -838.42744818 | -0.28954 | -0.05455 |

---

Compound 5.03

---

|                              |               |          |          |
|------------------------------|---------------|----------|----------|
| <b>B3LYP/6-31G(d)</b>        | -838.63466759 | -0.21304 | -0.10061 |
| <b>B3LYP/6-31++G(d,p)</b>    | -838.86604905 | -0.22698 | -0.11600 |
| <b>mpw1pw91/6-31++G(d,p)</b> | -838.65898209 | -0.23345 | -0.11114 |
| <b>wb97xd/6-31++G(d,p)</b>   | -838.42764520 | -0.28760 | -0.05477 |

---

Compound 5.04

---

|                              |               |          |          |
|------------------------------|---------------|----------|----------|
| <b>B3LYP/6-31G(d)</b>        | -838.63374252 | -0.21182 | -0.09927 |
| <b>B3LYP/6-31++G(d,p)</b>    | -838.86259843 | -0.22530 | -0.11381 |
| <b>mpw1pw91/6-31++G(d,p)</b> | -838.65574048 | -0.23171 | -0.10898 |
| <b>wb97xd/6-31++G(d,p)</b>   | -838.42659625 | -0.28558 | -0.05285 |

---

Table S1-2: Dihedral arrangements between the neighbouring pyrrolic units in the model **BODIPY** Dyes

|               | <b>Ground state B3LYP/6-31G(d)</b> | <b>Excited state B3LYP/6-31G(d)</b> |
|---------------|------------------------------------|-------------------------------------|
| <b>BODIPY</b> | 9.802                              | 15.107                              |
| <b>1.01</b>   | 6.030                              | 17.895                              |
| <b>1.02</b>   | 4.222                              | 15.921                              |
| <b>1.03</b>   | 3.617                              | 15.247                              |
| <b>1.04</b>   | 0.000                              | 1.695                               |
| <b>2.01</b>   | 7.136                              | 22.163                              |
| <b>2.02</b>   | 4.070                              | 18.047                              |
| <b>2.03</b>   | 0.658                              | 7.774                               |
| <b>2.04</b>   | 3.045                              | 12.855                              |
| <b>2.05</b>   | 0.000                              | 1.264                               |
| <b>2.06</b>   | 0.086                              | 0.021                               |
| <b>2.07</b>   | 1.335                              | 16.165                              |
| <b>2.08</b>   | 4.851                              | 11.966                              |
| <b>2.09</b>   | 0.000                              | 3.096                               |
| <b>2.10</b>   | 0.000                              | 0.382                               |
| <b>2.11</b>   | 3.701                              | 16.090                              |
| <b>2.12</b>   | 0.000                              | 0.016                               |
| <b>3.01</b>   | 3.280                              | 16.312                              |
| <b>3.02</b>   | 0.304                              | 16.709                              |
| <b>3.03</b>   | 3.152                              | 15.315                              |
| <b>3.04</b>   | 3.538                              | 9.470                               |
| <b>4.01</b>   | 6.762                              | 18.776                              |
| <b>4.02</b>   | 4.137                              | 18.615                              |
| <b>4.03</b>   | 2.878                              | 13.113                              |
| <b>4.04</b>   | 3.268                              | 12.154                              |
| <b>4.05</b>   | 3.331                              | 9.294                               |
| <b>4.06</b>   | 3.153                              | 6.316                               |

---

|             |        |        |
|-------------|--------|--------|
| <b>4.07</b> | 2.903  | 15.263 |
| <b>4.08</b> | 4.151  | 11.927 |
| <b>4.09</b> | 3.270  | 10.068 |
| <b>4.10</b> | 2.657  | 9.111  |
| <b>4.11</b> | 3.019  | 16.666 |
| <b>4.12</b> | 0.421  | 0.346  |
| <b>5.01</b> | 15.557 | 48.216 |
| <b>5.02</b> | 5.415  | 17.372 |
| <b>5.03</b> | 3.436  | 14.743 |
| <b>5.04</b> | 7.800  | 18.292 |

---
