# Supplementary material for: Effect of alkyl substituents in BODIPYs: a comparative DFT computational investigation
Source: Royal Society of Chemistry journal article supplement (doi:10.1039/c4ra12071j), 2014-12-01
Supplement: c4ra12071j2.pdf [file c4ra12071j2.pdf]

*Supporting Information-2*

**Effect of Alkyl Substituents in BODIPYs: A Comparative DFT  
Computational Investigation**

*Sanjoy Mukherjee and Pakkirisamy Thilagar\**

Department of Inorganic and Physical Chemistry, Indian Institute of Science, Bangalore-560012

Email: sanjoymkj@ipc.iisc.ernet.in, thilagar@ipc.iisc.ernet.in

---

**Table of Contents**

Computationally obtained geometries of the model BODIPYs                      Page S2-2 to S2-110

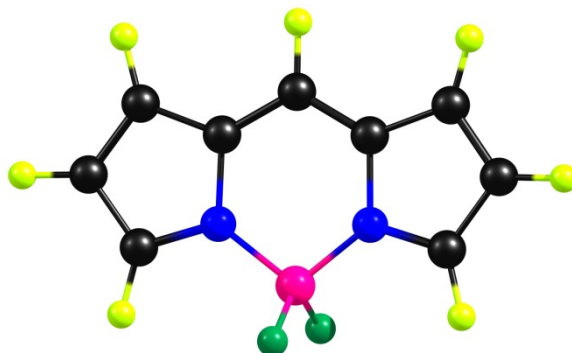

Figure S2-1: DFT B3LYP/6-31G(d) optimised ground-state structure of **BODIPY**

**DFT B3LYP/6-31G(d) optimised ground state structure:**

| Center Number | Atomic Number | Atomic Type | Coordinates (Angstroms) |          |          |
|---------------|---------------|-------------|-------------------------|----------|----------|
|               |               |             | X                       | Y        | Z        |
| 1             | 5             | 0           | 6.129105                | 4.183757 | 2.060494 |
| 2             | 9             | 0           | 5.198934                | 4.314698 | 1.049648 |
| 3             | 9             | 0           | 5.598052                | 3.556089 | 3.170572 |
| 4             | 7             | 0           | 6.687936                | 5.598928 | 2.466738 |
| 5             | 7             | 0           | 7.379793                | 3.379059 | 1.542542 |
| 6             | 6             | 0           | 5.969459                | 6.652221 | 2.877364 |
| 7             | 6             | 0           | 6.820486                | 7.725940 | 3.222565 |
| 8             | 1             | 0           | 6.500529                | 8.694918 | 3.580019 |
| 9             | 6             | 0           | 8.119702                | 7.288968 | 3.006527 |
| 10            | 1             | 0           | 9.037729                | 7.842329 | 3.155905 |
| 11            | 6             | 0           | 8.035086                | 5.954046 | 2.530025 |
| 12            | 6             | 0           | 9.019865                | 5.058217 | 2.124119 |
| 13            | 6             | 0           | 8.708106                | 3.794614 | 1.630991 |
| 14            | 6             | 0           | 9.532069                | 2.757285 | 1.119849 |
| 15            | 1             | 0           | 10.611726               | 2.792041 | 1.053315 |
| 16            | 6             | 0           | 8.690038                | 1.727339 | 0.725164 |
| 17            | 1             | 0           | 8.967431                | 0.779672 | 0.284661 |
| 18            | 6             | 0           | 7.371833                | 2.152601 | 1.004036 |
| 19            | 1             | 0           | 6.438290                | 1.630682 | 0.840247 |
| 20            | 1             | 0           | 4.889140                | 6.601244 | 2.909643 |
| 21            | 1             | 0           | 10.061564               | 5.360449 | 2.177996 |

**DFT B3LYP/6-31++G(d,p) optimised ground state structure:**

| Center Number | Atomic Number | Atomic Type | Coordinates (Angstroms) |          |          |
|---------------|---------------|-------------|-------------------------|----------|----------|
|               |               |             | X                       | Y        | Z        |
| 1             | 5             | 0           | 6.131143                | 4.214420 | 1.988349 |
| 2             | 9             | 0           | 5.277510                | 4.399851 | 0.903943 |
| 3             | 9             | 0           | 5.473053                | 3.573590 | 3.034896 |
| 4             | 7             | 0           | 6.690055                | 5.597869 | 2.473476 |
| 5             | 7             | 0           | 7.382456                | 3.376292 | 1.548557 |
| 6             | 6             | 0           | 5.974794                | 6.629811 | 2.939158 |
| 7             | 6             | 0           | 6.826587                | 7.702634 | 3.277015 |
| 8             | 1             | 0           | 6.511177                | 8.654206 | 3.674872 |
| 9             | 6             | 0           | 8.120327                | 7.288817 | 2.997948 |
| 10            | 1             | 0           | 9.034780                | 7.847197 | 3.130602 |
| 11            | 6             | 0           | 8.033654                | 5.966131 | 2.493064 |
| 12            | 6             | 0           | 9.015888                | 5.083388 | 2.060702 |
| 13            | 6             | 0           | 8.705279                | 3.811213 | 1.595891 |
| 14            | 6             | 0           | 9.530791                | 2.763321 | 1.113843 |
| 15            | 1             | 0           | 10.606466               | 2.804415 | 1.031129 |
| 16            | 6             | 0           | 8.694927                | 1.708033 | 0.781297 |
| 17            | 1             | 0           | 8.975897                | 0.746108 | 0.382526 |
| 18            | 6             | 0           | 7.378008                | 2.127579 | 1.064757 |
| 19            | 1             | 0           | 6.451526                | 1.587055 | 0.940127 |
| 20            | 1             | 0           | 4.899326                | 6.567310 | 3.013534 |

21 1 0 10.053228 5.395858 2.086735

DFT mpw1pw91/6-31++G(d,p) optimised ground state structure:

| Center<br>Number | Atomic<br>Number | Atomic<br>Type | Coordinates (Angstroms) |          |          |
|------------------|------------------|----------------|-------------------------|----------|----------|
|                  |                  |                | X                       | Y        | Z        |
| 1                | 5                | 0              | 6.137368                | 4.215826 | 1.989660 |
| 2                | 9                | 0              | 5.287237                | 4.399995 | 0.910926 |
| 3                | 9                | 0              | 5.486258                | 3.578240 | 3.033673 |
| 4                | 7                | 0              | 6.695257                | 5.593964 | 2.471049 |
| 5                | 7                | 0              | 7.384429                | 3.382668 | 1.550417 |
| 6                | 6                | 0              | 5.981232                | 6.620402 | 2.933005 |
| 7                | 6                | 0              | 6.827935                | 7.691716 | 3.271277 |
| 8                | 1                | 0              | 6.510869                | 8.642754 | 3.668065 |
| 9                | 6                | 0              | 8.118347                | 7.279300 | 2.995027 |
| 10               | 1                | 0              | 9.032784                | 7.836932 | 3.128177 |
| 11               | 6                | 0              | 8.030704                | 5.960866 | 2.492430 |
| 12               | 6                | 0              | 9.011600                | 5.081352 | 2.062360 |
| 13               | 6                | 0              | 8.700044                | 3.813201 | 1.598262 |
| 14               | 6                | 0              | 9.523826                | 2.769719 | 1.117548 |
| 15               | 1                | 0              | 10.599221               | 2.810916 | 1.035671 |
| 16               | 6                | 0              | 8.689520                | 1.718709 | 0.784571 |
| 17               | 1                | 0              | 8.968602                | 0.756974 | 0.385040 |
| 18               | 6                | 0              | 7.377569                | 2.140161 | 1.067783 |
| 19               | 1                | 0              | 6.449594                | 1.602657 | 0.943114 |
| 20               | 1                | 0              | 4.905972                | 6.555465 | 3.005049 |
| 21               | 1                | 0              | 10.048503               | 5.393281 | 2.089320 |

DFT wb97xd/6-31++G(d,p) optimised ground state structure:

| Center<br>Number | Atomic<br>Number | Atomic<br>Type | Coordinates (Angstroms) |          |          |
|------------------|------------------|----------------|-------------------------|----------|----------|
|                  |                  |                | X                       | Y        | Z        |
| 1                | 5                | 0              | 6.135835                | 4.216066 | 1.987933 |
| 2                | 9                | 0              | 5.285433                | 4.402315 | 0.903926 |
| 3                | 9                | 0              | 5.479981                | 3.576314 | 3.033644 |
| 4                | 7                | 0              | 6.694260                | 5.594551 | 2.471561 |
| 5                | 7                | 0              | 7.383986                | 3.381508 | 1.550232 |
| 6                | 6                | 0              | 5.979036                | 6.620987 | 2.935014 |
| 7                | 6                | 0              | 6.825806                | 7.695306 | 3.274342 |
| 8                | 1                | 0              | 6.507589                | 8.647391 | 3.672681 |
| 9                | 6                | 0              | 8.119066                | 7.283902 | 2.996622 |
| 10               | 1                | 0              | 9.034647                | 7.843618 | 3.130069 |
| 11               | 6                | 0              | 8.033217                | 5.964366 | 2.492672 |
| 12               | 6                | 0              | 9.015462                | 5.083063 | 2.061141 |
| 13               | 6                | 0              | 8.703958                | 3.812236 | 1.596720 |
| 14               | 6                | 0              | 9.527016                | 2.766357 | 1.115862 |
| 15               | 1                | 0              | 10.604465               | 2.806696 | 1.033090 |
| 16               | 6                | 0              | 8.690081                | 1.713599 | 0.783984 |
| 17               | 1                | 0              | 8.969006                | 0.749690 | 0.384630 |
| 18               | 6                | 0              | 7.376389                | 2.137450 | 1.068392 |
| 19               | 1                | 0              | 6.444875                | 1.602066 | 0.945825 |
| 20               | 1                | 0              | 4.902252                | 6.551718 | 3.006523 |
| 21               | 1                | 0              | 10.054514               | 5.395900 | 2.087557 |

DFT B3LYP/6-31G(d) optimised 1<sup>st</sup> excited-state structure:

| Center<br>Number | Atomic<br>Number | Atomic<br>Type | Coordinates (Angstroms) |          |          |
|------------------|------------------|----------------|-------------------------|----------|----------|
|                  |                  |                | X                       | Y        | Z        |
| 1                | 5                | 0              | 6.191626                | 4.144471 | 2.229562 |
| 2                | 9                | 0              | 5.120560                | 4.124221 | 1.359342 |

|    |   |   |           |          |          |
|----|---|---|-----------|----------|----------|
| 3  | 9 | 0 | 5.903936  | 3.501241 | 3.422333 |
| 4  | 7 | 0 | 6.719206  | 5.574582 | 2.447324 |
| 5  | 7 | 0 | 7.406035  | 3.374321 | 1.570148 |
| 6  | 6 | 0 | 5.963942  | 6.665763 | 2.710751 |
| 7  | 6 | 0 | 6.788964  | 7.747403 | 3.073523 |
| 8  | 1 | 0 | 6.443702  | 8.739805 | 3.330996 |
| 9  | 6 | 0 | 8.104971  | 7.300836 | 3.030683 |
| 10 | 1 | 0 | 9.004020  | 7.869409 | 3.225623 |
| 11 | 6 | 0 | 8.075355  | 5.930271 | 2.619536 |
| 12 | 6 | 0 | 9.084404  | 5.040654 | 2.332337 |
| 13 | 6 | 0 | 8.750153  | 3.756315 | 1.715405 |
| 14 | 6 | 0 | 9.511003  | 2.802824 | 1.126603 |
| 15 | 1 | 0 | 10.589696 | 2.782886 | 1.046230 |
| 16 | 6 | 0 | 8.575048  | 1.765953 | 0.576977 |
| 17 | 1 | 0 | 8.866756  | 0.860883 | 0.062222 |
| 18 | 6 | 0 | 7.311334  | 2.188857 | 0.870943 |
| 19 | 1 | 0 | 6.345959  | 1.751315 | 0.670987 |
| 20 | 1 | 0 | 4.886129  | 6.615092 | 2.644845 |
| 21 | 1 | 0 | 10.124074 | 5.307994 | 2.466051 |

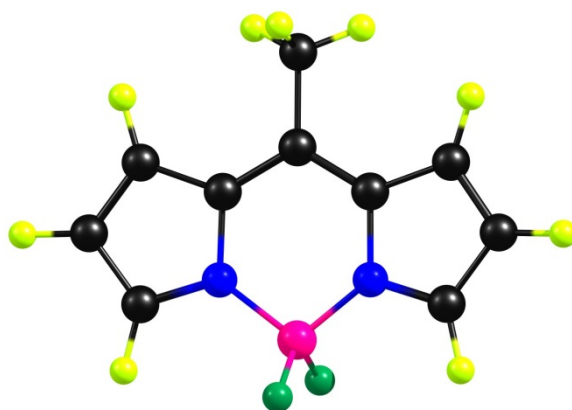

Figure S2-2: DFT B3LYP/6-31G(d) optimised ground-state structure of **1.01**

**DFT B3LYP/6-31G(d) optimised ground state structure:**

| Center Number | Atomic Number | Atomic Type | Coordinates (Angstroms) |          |          |
|---------------|---------------|-------------|-------------------------|----------|----------|
|               |               |             | X                       | Y        | Z        |
| 1             | 5             | 0           | 6.138771                | 4.180886 | 2.076855 |
| 2             | 9             | 0           | 5.189869                | 4.299938 | 1.080784 |
| 3             | 9             | 0           | 5.628401                | 3.552087 | 3.197694 |
| 4             | 7             | 0           | 6.695735                | 5.594575 | 2.466646 |
| 5             | 7             | 0           | 7.386308                | 3.392190 | 1.545550 |
| 6             | 6             | 0           | 5.965046                | 6.651516 | 2.844986 |
| 7             | 6             | 0           | 6.805771                | 7.722193 | 3.213938 |
| 8             | 1             | 0           | 6.479510                | 8.695650 | 3.553140 |
| 9             | 6             | 0           | 8.110653                | 7.277419 | 3.049106 |
| 10            | 1             | 0           | 9.016603                | 7.839897 | 3.229332 |
| 11            | 6             | 0           | 8.042637                | 5.940009 | 2.574808 |
| 12            | 6             | 0           | 9.054218                | 5.045922 | 2.194305 |
| 13            | 6             | 0           | 8.717616                | 3.787357 | 1.674517 |
| 14            | 6             | 0           | 9.531556                | 2.745850 | 1.153923 |
| 15            | 1             | 0           | 10.611761               | 2.752595 | 1.101734 |
| 16            | 6             | 0           | 8.681222                | 1.740975 | 0.712487 |
| 17            | 1             | 0           | 8.954686                | 0.801774 | 0.251790 |
| 18            | 6             | 0           | 7.366986                | 2.180429 | 0.975089 |
| 19            | 1             | 0           | 6.426924                | 1.680859 | 0.782187 |
| 20            | 1             | 0           | 4.884374                | 6.600383 | 2.839632 |
| 21            | 6             | 0           | 10.498990               | 5.463071 | 2.280078 |
| 22            | 1             | 0           | 10.810938               | 5.950821 | 1.347772 |
| 23            | 1             | 0           | 10.661184               | 6.171035 | 3.095986 |
| 24            | 1             | 0           | 11.152913               | 4.602834 | 2.440090 |

-----  
**DFT B3LYP/6-31++G(d,p) optimised ground state structure:**

| Center<br>Number | Atomic<br>Number | Atomic<br>Type | Coordinates (Angstroms) |          |          |
|------------------|------------------|----------------|-------------------------|----------|----------|
|                  |                  |                | X                       | Y        | Z        |
| 1                | 5                | 0              | 6.141479                | 4.211096 | 2.006689 |
| 2                | 9                | 0              | 5.258011                | 4.379157 | 0.942491 |
| 3                | 9                | 0              | 5.512728                | 3.568135 | 3.072673 |
| 4                | 7                | 0              | 6.698464                | 5.595116 | 2.471606 |
| 5                | 7                | 0              | 7.389882                | 3.389974 | 1.549368 |
| 6                | 6                | 0              | 5.968350                | 6.636640 | 2.890330 |
| 7                | 6                | 0              | 6.810578                | 7.700134 | 3.268274 |
| 8                | 1                | 0              | 6.486926                | 8.658967 | 3.641386 |
| 9                | 6                | 0              | 8.113612                | 7.267972 | 3.066856 |
| 10               | 1                | 0              | 9.016615                | 7.828958 | 3.249887 |
| 11               | 6                | 0              | 8.044895                | 5.943466 | 2.562730 |
| 12               | 6                | 0              | 9.055738                | 5.058185 | 2.166102 |
| 13               | 6                | 0              | 8.718724                | 3.794420 | 1.663950 |
| 14               | 6                | 0              | 9.533026                | 2.741029 | 1.173582 |
| 15               | 1                | 0              | 10.610581               | 2.745320 | 1.123788 |
| 16               | 6                | 0              | 8.685562                | 1.720243 | 0.767345 |
| 17               | 1                | 0              | 8.960998                | 0.768401 | 0.341369 |
| 18               | 6                | 0              | 7.371749                | 2.160773 | 1.018422 |
| 19               | 1                | 0              | 6.436544                | 1.650488 | 0.842881 |
| 20               | 1                | 0              | 4.890082                | 6.582628 | 2.905610 |
| 21               | 6                | 0              | 10.497075               | 5.481869 | 2.233637 |
| 22               | 1                | 0              | 10.788760               | 5.965634 | 1.295577 |
| 23               | 1                | 0              | 10.665727               | 6.193549 | 3.041280 |
| 24               | 1                | 0              | 11.156565               | 4.628113 | 2.386595 |

-----  
**DFT mpw1pw91/6-31++G(d,p) optimised ground state structure:**

| Center<br>Number | Atomic<br>Number | Atomic<br>Type | Coordinates (Angstroms) |          |          |
|------------------|------------------|----------------|-------------------------|----------|----------|
|                  |                  |                | X                       | Y        | Z        |
| 1                | 5                | 0              | 6.151439                | 4.204630 | 2.029632 |
| 2                | 9                | 0              | 5.244732                | 4.353956 | 0.991792 |
| 3                | 9                | 0              | 5.563088                | 3.567230 | 3.113135 |
| 4                | 7                | 0              | 6.704833                | 5.592341 | 2.467435 |
| 5                | 7                | 0              | 7.393150                | 3.397141 | 1.549979 |
| 6                | 6                | 0              | 5.976348                | 6.633303 | 2.870706 |
| 7                | 6                | 0              | 6.814202                | 7.696453 | 3.244382 |
| 8                | 1                | 0              | 6.489360                | 8.658919 | 3.605829 |
| 9                | 6                | 0              | 8.113882                | 7.260812 | 3.056181 |
| 10               | 1                | 0              | 9.017622                | 7.820761 | 3.238075 |
| 11               | 6                | 0              | 8.042931                | 5.937253 | 2.564346 |
| 12               | 6                | 0              | 9.052141                | 5.053272 | 2.174644 |
| 13               | 6                | 0              | 8.714558                | 3.795458 | 1.669159 |
| 14               | 6                | 0              | 9.527502                | 2.751263 | 1.171375 |
| 15               | 1                | 0              | 10.604919               | 2.756756 | 1.121516 |
| 16               | 6                | 0              | 8.681649                | 1.738888 | 0.754422 |
| 17               | 1                | 0              | 8.955261                | 0.791810 | 0.317759 |
| 18               | 6                | 0              | 7.372660                | 2.179081 | 1.008957 |
| 19               | 1                | 0              | 6.435986                | 1.673639 | 0.828659 |
| 20               | 1                | 0              | 4.898234                | 6.579170 | 2.879110 |
| 21               | 6                | 0              | 10.485636               | 5.472030 | 2.249452 |
| 22               | 1                | 0              | 10.777712               | 5.964505 | 1.317225 |
| 23               | 1                | 0              | 10.651901               | 6.175294 | 3.063968 |
| 24               | 1                | 0              | 11.142927               | 4.616303 | 2.394686 |

-----  
**DFT wb97xd/6-31++G(d,p) optimised ground state structure:**

| Center<br>Number | Atomic<br>Number | Atomic<br>Type | Coordinates (Angstroms) |          |          |
|------------------|------------------|----------------|-------------------------|----------|----------|
|                  |                  |                | X                       | Y        | Z        |
| 1                | 5                | 0              | 6.146829                | 4.213695 | 2.004648 |
| 2                | 9                | 0              | 5.274816                | 4.387814 | 0.934719 |
| 3                | 9                | 0              | 5.511161                | 3.571504 | 3.063558 |
| 4                | 7                | 0              | 6.703857                | 5.591138 | 2.474123 |
| 5                | 7                | 0              | 7.392905                | 3.393311 | 1.554863 |
| 6                | 6                | 0              | 5.974171                | 6.627968 | 2.890231 |
| 7                | 6                | 0              | 6.811932                | 7.693113 | 3.267103 |
| 8                | 1                | 0              | 6.486059                | 8.653471 | 3.638497 |
| 9                | 6                | 0              | 8.114272                | 7.262772 | 3.066152 |
| 10               | 1                | 0              | 9.018382                | 7.826261 | 3.248677 |
| 11               | 6                | 0              | 8.045052                | 5.940760 | 2.565791 |
| 12               | 6                | 0              | 9.054583                | 5.056626 | 2.168870 |
| 13               | 6                | 0              | 8.718084                | 3.794020 | 1.667889 |
| 14               | 6                | 0              | 9.530732                | 2.744752 | 1.176453 |
| 15               | 1                | 0              | 10.610348               | 2.748436 | 1.124830 |
| 16               | 6                | 0              | 8.682790                | 1.725719 | 0.771202 |
| 17               | 1                | 0              | 8.956676                | 0.773048 | 0.342460 |
| 18               | 6                | 0              | 7.372195                | 2.168745 | 1.025138 |
| 19               | 1                | 0              | 6.432377                | 1.663213 | 0.851062 |
| 20               | 1                | 0              | 4.894641                | 6.568069 | 2.902534 |
| 21               | 6                | 0              | 10.492243               | 5.480955 | 2.231983 |
| 22               | 1                | 0              | 10.772662               | 5.963107 | 1.289413 |
| 23               | 1                | 0              | 10.662222               | 6.194676 | 3.038943 |
| 24               | 1                | 0              | 11.153682               | 4.627093 | 2.383290 |

**DFT B3LYP/6-31G(d) optimised 1<sup>st</sup> excited-state structure:**

| Center<br>Number | Atomic<br>Number | Atomic<br>Type | Coordinates (Angstroms) |          |           |
|------------------|------------------|----------------|-------------------------|----------|-----------|
|                  |                  |                | X                       | Y        | Z         |
| 1                | 5                | 0              | 6.210562                | 4.121020 | 2.296396  |
| 2                | 9                | 0              | 5.084206                | 4.062787 | 1.500351  |
| 3                | 9                | 0              | 6.020357                | 3.488390 | 3.514795  |
| 4                | 7                | 0              | 6.718484                | 5.563015 | 2.455454  |
| 5                | 7                | 0              | 7.399754                | 3.382116 | 1.569212  |
| 6                | 6                | 0              | 5.945069                | 6.643000 | 2.711819  |
| 7                | 6                | 0              | 6.753394                | 7.744935 | 3.042237  |
| 8                | 1                | 0              | 6.394341                | 8.735906 | 3.286510  |
| 9                | 6                | 0              | 8.077909                | 7.323300 | 2.987712  |
| 10               | 1                | 0              | 8.960665                | 7.924765 | 3.152717  |
| 11               | 6                | 0              | 8.072754                | 5.944868 | 2.599303  |
| 12               | 6                | 0              | 9.101315                | 5.070499 | 2.304589  |
| 13               | 6                | 0              | 8.741394                | 3.784858 | 1.673508  |
| 14               | 6                | 0              | 9.494446                | 2.860727 | 1.029875  |
| 15               | 1                | 0              | 10.568390               | 2.859503 | 0.904185  |
| 16               | 6                | 0              | 8.554766                | 1.822639 | 0.489070  |
| 17               | 1                | 0              | 8.840518                | 0.933818 | -0.056506 |
| 18               | 6                | 0              | 7.296514                | 2.217132 | 0.842428  |
| 19               | 1                | 0              | 6.331114                | 1.768568 | 0.668431  |
| 20               | 1                | 0              | 4.867733                | 6.567238 | 2.666979  |
| 21               | 6                | 0              | 10.549417               | 5.400394 | 2.476063  |
| 22               | 1                | 0              | 11.072080               | 5.490010 | 1.510452  |
| 23               | 1                | 0              | 10.684657               | 6.342557 | 3.012358  |
| 24               | 1                | 0              | 11.072834               | 4.618223 | 3.044486  |

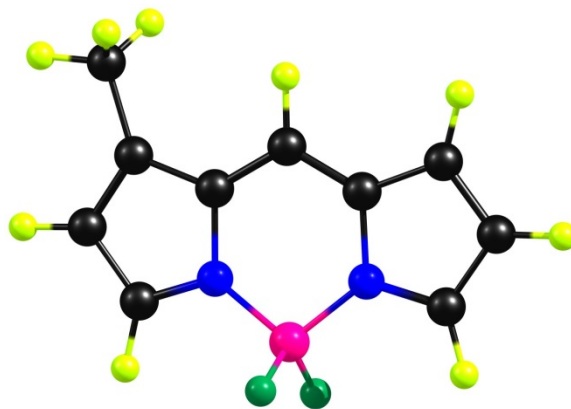

Figure S2-3: DFT B3LYP/6-31G(d) optimised ground-state structure of **1.02**

**DFT B3LYP/6-31G(d) optimised ground state structure:**

| Center Number | Atomic Number | Atomic Type | Coordinates (Angstroms) |          |          |
|---------------|---------------|-------------|-------------------------|----------|----------|
|               |               |             | X                       | Y        | Z        |
| 1             | 5             | 0           | 6.132239                | 4.186009 | 2.059859 |
| 2             | 9             | 0           | 5.200336                | 4.318953 | 1.049950 |
| 3             | 9             | 0           | 5.598345                | 3.560325 | 3.170695 |
| 4             | 7             | 0           | 6.691666                | 5.600932 | 2.465895 |
| 5             | 7             | 0           | 7.380711                | 3.381364 | 1.543130 |
| 6             | 6             | 0           | 5.974958                | 6.653601 | 2.873510 |
| 7             | 6             | 0           | 6.826580                | 7.724181 | 3.222892 |
| 8             | 1             | 0           | 6.507832                | 8.694442 | 3.580304 |
| 9             | 6             | 0           | 8.134198                | 7.299590 | 3.016916 |
| 10            | 6             | 0           | 8.040564                | 5.956105 | 2.536078 |
| 11            | 6             | 0           | 9.020982                | 5.059088 | 2.134021 |
| 12            | 6             | 0           | 8.708324                | 3.794254 | 1.636967 |
| 13            | 6             | 0           | 9.532218                | 2.758530 | 1.126951 |
| 14            | 1             | 0           | 10.612178               | 2.791958 | 1.064073 |
| 15            | 6             | 0           | 8.689612                | 1.729300 | 0.726263 |
| 16            | 1             | 0           | 8.968220                | 0.782554 | 0.284433 |
| 17            | 6             | 0           | 7.372365                | 2.154756 | 1.001031 |
| 18            | 1             | 0           | 6.438339                | 1.635117 | 0.833323 |
| 19            | 1             | 0           | 4.894288                | 6.605443 | 2.901914 |
| 20            | 1             | 0           | 10.064570               | 5.354779 | 2.190674 |
| 21            | 6             | 0           | 9.396065                | 8.078153 | 3.235226 |
| 22            | 1             | 0           | 10.065114               | 7.577089 | 3.945876 |
| 23            | 1             | 0           | 9.956553                | 8.213268 | 2.301513 |
| 24            | 1             | 0           | 9.173119                | 9.071958 | 3.633818 |

**DFT B3LYP/6-31++G(d,p) optimised ground state structure:**

| Center Number | Atomic Number | Atomic Type | Coordinates (Angstroms) |          |          |
|---------------|---------------|-------------|-------------------------|----------|----------|
|               |               |             | X                       | Y        | Z        |
| 1             | 5             | 0           | 6.134541                | 4.219633 | 1.982379 |
| 2             | 9             | 0           | 5.285722                | 4.413267 | 0.894280 |
| 3             | 9             | 0           | 5.464935                | 3.579223 | 3.023272 |
| 4             | 7             | 0           | 6.694785                | 5.599154 | 2.475658 |
| 5             | 7             | 0           | 7.383541                | 3.379478 | 1.548111 |
| 6             | 6             | 0           | 5.981701                | 6.629592 | 2.939322 |
| 7             | 6             | 0           | 6.834158                | 7.698437 | 3.286325 |
| 8             | 1             | 0           | 6.517748                | 8.650005 | 3.685721 |
| 9             | 6             | 0           | 8.136631                | 7.296201 | 3.019178 |
| 10            | 6             | 0           | 8.041694                | 5.966251 | 2.506156 |
| 11            | 6             | 0           | 9.018671                | 5.082249 | 2.077645 |
| 12            | 6             | 0           | 8.706157                | 3.809709 | 1.605395 |
| 13            | 6             | 0           | 9.531486                | 2.763046 | 1.125904 |

|    |   |   |           |          |          |
|----|---|---|-----------|----------|----------|
| 14 | 1 | 0 | 10.607825 | 2.801350 | 1.050355 |
| 15 | 6 | 0 | 8.694209  | 1.709519 | 0.783595 |
| 16 | 1 | 0 | 8.976225  | 0.748466 | 0.383350 |
| 17 | 6 | 0 | 7.378198  | 2.130657 | 1.059304 |
| 18 | 1 | 0 | 6.450732  | 1.593874 | 0.927031 |
| 19 | 1 | 0 | 4.905399  | 6.570905 | 3.006878 |
| 20 | 1 | 0 | 10.058827 | 5.385365 | 2.108886 |
| 21 | 6 | 0 | 9.394865  | 8.081576 | 3.220997 |
| 22 | 1 | 0 | 10.074251 | 7.581512 | 3.918318 |
| 23 | 1 | 0 | 9.936474  | 8.223112 | 2.280510 |
| 24 | 1 | 0 | 9.170600  | 9.069166 | 3.626744 |

DFT mpw1pw91/6-31++G(d,p) optimised ground state structure:

| Center<br>Number | Atomic<br>Number | Atomic<br>Type | Coordinates (Angstroms) |          |          |
|------------------|------------------|----------------|-------------------------|----------|----------|
|                  |                  |                | X                       | Y        | Z        |
| 1                | 5                | 0              | 6.141699                | 4.223722 | 1.982580 |
| 2                | 9                | 0              | 5.299060                | 4.417405 | 0.898267 |
| 3                | 9                | 0              | 5.475989                | 3.586358 | 3.018870 |
| 4                | 7                | 0              | 6.700654                | 5.597197 | 2.474192 |
| 5                | 7                | 0              | 7.386956                | 3.388061 | 1.551141 |
| 6                | 6                | 0              | 5.989032                | 6.621841 | 2.935653 |
| 7                | 6                | 0              | 6.836460                | 7.689281 | 3.282718 |
| 8                | 1                | 0              | 6.518905                | 8.640039 | 3.682081 |
| 9                | 6                | 0              | 8.135323                | 7.288596 | 3.016388 |
| 10               | 6                | 0              | 8.039088                | 5.963404 | 2.505115 |
| 11               | 6                | 0              | 9.015231                | 5.083602 | 2.078425 |
| 12               | 6                | 0              | 8.702285                | 3.814579 | 1.607689 |
| 13               | 6                | 0              | 9.526035                | 2.772163 | 1.130285 |
| 14               | 1                | 0              | 10.602050               | 2.810887 | 1.055109 |
| 15               | 6                | 0              | 8.690566                | 1.722129 | 0.789277 |
| 16               | 1                | 0              | 8.970907                | 0.760883 | 0.389335 |
| 17               | 6                | 0              | 7.379523                | 2.144908 | 1.064945 |
| 18               | 1                | 0              | 6.450757                | 1.610584 | 0.933705 |
| 19               | 1                | 0              | 4.913041                | 6.560331 | 3.002071 |
| 20               | 1                | 0              | 10.054660               | 5.387537 | 2.110142 |
| 21               | 6                | 0              | 9.388955                | 8.068308 | 3.216523 |
| 22               | 1                | 0              | 10.066416               | 7.566576 | 3.912807 |
| 23               | 1                | 0              | 9.928763                | 8.208023 | 2.275999 |
| 24               | 1                | 0              | 9.167020                | 9.055334 | 3.621995 |

DFT wb97xd/6-31++G(d,p) optimised ground state structure:

| Center<br>Number | Atomic<br>Number | Atomic<br>Type | Coordinates (Angstroms) |          |          |
|------------------|------------------|----------------|-------------------------|----------|----------|
|                  |                  |                | X                       | Y        | Z        |
| 1                | 5                | 0              | 6.139953                | 4.218281 | 1.990446 |
| 2                | 9                | 0              | 5.286455                | 4.409729 | 0.908597 |
| 3                | 9                | 0              | 5.481981                | 3.576941 | 3.035132 |
| 4                | 7                | 0              | 6.697143                | 5.595551 | 2.479094 |
| 5                | 7                | 0              | 7.386535                | 3.387152 | 1.550480 |
| 6                | 6                | 0              | 5.985388                | 6.619359 | 2.944197 |
| 7                | 6                | 0              | 6.833203                | 7.691821 | 3.288169 |
| 8                | 1                | 0              | 6.515861                | 8.644336 | 3.688684 |
| 9                | 6                | 0              | 8.132739                | 7.292909 | 3.015611 |
| 10               | 6                | 0              | 8.038893                | 5.967179 | 2.503521 |
| 11               | 6                | 0              | 9.016314                | 5.091141 | 2.067847 |
| 12               | 6                | 0              | 8.704963                | 3.817999 | 1.597071 |
| 13               | 6                | 0              | 9.527955                | 2.777739 | 1.111589 |
| 14               | 1                | 0              | 10.605374               | 2.819662 | 1.027660 |
| 15               | 6                | 0              | 8.690859                | 1.723301 | 0.775144 |
| 16               | 1                | 0              | 8.971591                | 0.761869 | 0.371183 |
| 17               | 6                | 0              | 7.379101                | 2.143157 | 1.062095 |
| 18               | 1                | 0              | 6.447632                | 1.608297 | 0.938012 |
| 19               | 1                | 0              | 4.908074                | 6.552880 | 3.013689 |
| 20               | 1                | 0              | 10.056660               | 5.401194 | 2.091980 |



|    |   |   |           |          |          |
|----|---|---|-----------|----------|----------|
| 21 | 6 | 0 | 9.394670  | 8.067426 | 3.225313 |
| 22 | 1 | 0 | 9.980960  | 7.647121 | 4.049376 |
| 23 | 1 | 0 | 10.024767 | 8.058599 | 2.330550 |
| 24 | 1 | 0 | 9.172305  | 9.108107 | 3.469869 |

DFT B3LYP/6-31G(d) optimised 1<sup>st</sup> excited-state structure:

| Center Number | Atomic Number | Atomic Type | Coordinates (Angstroms) |          |          |
|---------------|---------------|-------------|-------------------------|----------|----------|
|               |               |             | X                       | Y        | Z        |
| 1             | 5             | 0           | 6.198796                | 4.140220 | 2.248672 |
| 2             | 9             | 0           | 5.112857                | 4.109906 | 1.396654 |
| 3             | 9             | 0           | 5.931785                | 3.505176 | 3.451251 |
| 4             | 7             | 0           | 6.725869                | 5.572209 | 2.445420 |
| 5             | 7             | 0           | 7.405502                | 3.371077 | 1.574946 |
| 6             | 6             | 0           | 5.976255                | 6.668049 | 2.702657 |
| 7             | 6             | 0           | 6.806815                | 7.748195 | 3.053014 |
| 8             | 1             | 0           | 6.467217                | 8.745078 | 3.304005 |
| 9             | 6             | 0           | 8.128505                | 7.310170 | 3.013618 |
| 10            | 6             | 0           | 8.083136                | 5.927996 | 2.609306 |
| 11            | 6             | 0           | 9.090466                | 5.040371 | 2.322136 |
| 12            | 6             | 0           | 8.752640                | 3.754108 | 1.707408 |
| 13            | 6             | 0           | 9.508330                | 2.804901 | 1.107086 |
| 14            | 1             | 0           | 10.585955               | 2.787312 | 1.013928 |
| 15            | 6             | 0           | 8.567431                | 1.769657 | 0.563409 |
| 16            | 1             | 0           | 8.853802                | 0.865754 | 0.043518 |
| 17            | 6             | 0           | 7.305236                | 2.190557 | 0.872663 |
| 18            | 1             | 0           | 6.338815                | 1.751459 | 0.681262 |
| 19            | 1             | 0           | 4.897860                | 6.621296 | 2.643493 |
| 20            | 1             | 0           | 10.131279               | 5.306736 | 2.448419 |
| 21            | 6             | 0           | 9.375558                | 8.090887 | 3.279721 |
| 22            | 1             | 0           | 9.960664                | 7.657863 | 4.102726 |
| 23            | 1             | 0           | 10.035153               | 8.117966 | 2.401058 |
| 24            | 1             | 0           | 9.139449                | 9.124805 | 3.548941 |

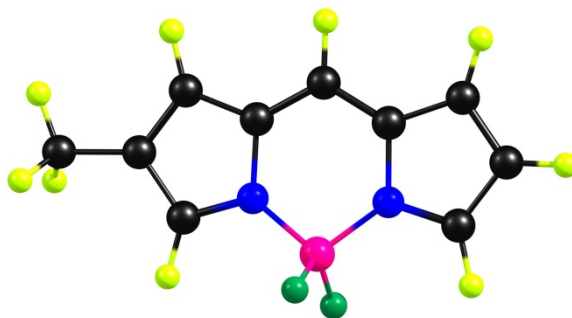

Figure S2-4: DFT B3LYP/6-31G(d) optimised ground-state structure of **1.03**

DFT B3LYP/6-31G(d) optimised ground state structure:

| Center Number | Atomic Number | Atomic Type | Coordinates (Angstroms) |          |          |
|---------------|---------------|-------------|-------------------------|----------|----------|
|               |               |             | X                       | Y        | Z        |
| 1             | 5             | 0           | 6.133555                | 4.208920 | 2.024287 |
| 2             | 9             | 0           | 5.225246                | 4.346380 | 0.993900 |
| 3             | 9             | 0           | 5.569018                | 3.599768 | 3.128636 |
| 4             | 7             | 0           | 6.700846                | 5.621543 | 2.432009 |
| 5             | 7             | 0           | 7.382939                | 3.385894 | 1.539594 |
| 6             | 6             | 0           | 5.988456                | 6.681625 | 2.828683 |
| 7             | 6             | 0           | 6.837729                | 7.765148 | 3.178943 |
| 8             | 6             | 0           | 8.132682                | 7.307210 | 2.973750 |
| 9             | 6             | 0           | 8.049621                | 5.968580 | 2.504974 |

|    |   |   |           |          |          |
|----|---|---|-----------|----------|----------|
| 10 | 6 | 0 | 9.029283  | 5.062076 | 2.118454 |
| 11 | 6 | 0 | 8.712426  | 3.793029 | 1.636398 |
| 12 | 6 | 0 | 9.533979  | 2.743630 | 1.150631 |
| 13 | 1 | 0 | 10.614569 | 2.769769 | 1.096072 |
| 14 | 6 | 0 | 8.688557  | 1.712130 | 0.762248 |
| 15 | 1 | 0 | 8.964819  | 0.755849 | 0.339965 |
| 16 | 6 | 0 | 7.371777  | 2.149836 | 1.019511 |
| 17 | 1 | 0 | 6.436193  | 1.632287 | 0.853839 |
| 18 | 1 | 0 | 4.906720  | 6.638147 | 2.852078 |
| 19 | 1 | 0 | 10.073042 | 5.355844 | 2.179277 |
| 20 | 1 | 0 | 9.051180  | 7.859429 | 3.129787 |
| 21 | 6 | 0 | 6.394979  | 9.115110 | 3.662591 |
| 22 | 1 | 0 | 5.767871  | 9.625900 | 2.921401 |
| 23 | 1 | 0 | 5.808388  | 9.042514 | 4.586744 |
| 24 | 1 | 0 | 7.256724  | 9.757837 | 3.866761 |

DFT B3LYP/6-31++G(d,p) optimised ground state structure:

| Center Number | Atomic Number | Atomic Type | Coordinates (Angstroms) |          |          |
|---------------|---------------|-------------|-------------------------|----------|----------|
|               |               |             | X                       | Y        | Z        |
| 1             | 5             | 0           | 6.137223                | 4.241051 | 1.948803 |
| 2             | 9             | 0           | 5.301428                | 4.418066 | 0.848319 |
| 3             | 9             | 0           | 5.453103                | 3.629122 | 2.996883 |
| 4             | 7             | 0           | 6.701578                | 5.628747 | 2.418519 |
| 5             | 7             | 0           | 7.385079                | 3.384069 | 1.546030 |
| 6             | 6             | 0           | 5.990414                | 6.674551 | 2.852744 |
| 7             | 6             | 0           | 6.840441                | 7.758937 | 3.190914 |
| 8             | 6             | 0           | 8.131513                | 7.318739 | 2.938123 |
| 9             | 6             | 0           | 8.047482                | 5.985973 | 2.454665 |
| 10            | 6             | 0           | 9.025689                | 5.087289 | 2.055612 |
| 11            | 6             | 0           | 8.710041                | 3.807256 | 1.607879 |
| 12            | 6             | 0           | 9.533121                | 2.744866 | 1.159675 |
| 13            | 1             | 0           | 10.610383               | 2.774804 | 1.094613 |
| 14            | 6             | 0           | 8.692469                | 1.689568 | 0.831533 |
| 15            | 1             | 0           | 8.971978                | 0.718234 | 0.455140 |
| 16            | 6             | 0           | 7.376563                | 2.125018 | 1.084324 |
| 17            | 1             | 0           | 6.446934                | 1.591465 | 0.954039 |
| 18            | 1             | 0           | 4.912352                | 6.621860 | 2.909509 |
| 19            | 1             | 0           | 10.065883               | 5.389064 | 2.092984 |
| 20            | 1             | 0           | 9.047959                | 7.873871 | 3.077262 |
| 21            | 6             | 0           | 6.399403                | 9.093792 | 3.712211 |
| 22            | 1             | 0           | 5.737518                | 9.602246 | 3.004583 |
| 23            | 1             | 0           | 5.854135                | 8.995912 | 4.655852 |
| 24            | 1             | 0           | 7.257912                | 9.743958 | 3.890317 |

DFT mpw1pw91/6-31++G(d,p) optimised ground state structure:

| Center Number | Atomic Number | Atomic Type | Coordinates (Angstroms) |          |          |
|---------------|---------------|-------------|-------------------------|----------|----------|
|               |               |             | X                       | Y        | Z        |
| 1             | 5             | 0           | 6.142879                | 4.246310 | 1.949233 |
| 2             | 9             | 0           | 5.313413                | 4.424188 | 0.852610 |
| 3             | 9             | 0           | 5.462427                | 3.637704 | 2.992679 |
| 4             | 7             | 0           | 6.706902                | 5.627572 | 2.417499 |
| 5             | 7             | 0           | 7.386366                | 3.393055 | 1.549036 |
| 6             | 6             | 0           | 5.997390                | 6.667353 | 2.849547 |
| 7             | 6             | 0           | 6.842569                | 7.750176 | 3.187820 |
| 8             | 6             | 0           | 8.130159                | 7.311872 | 2.936024 |
| 9             | 6             | 0           | 8.044749                | 5.983671 | 2.454041 |
| 10            | 6             | 0           | 9.021159                | 5.088224 | 2.056394 |
| 11            | 6             | 0           | 8.704170                | 3.811999 | 1.610078 |
| 12            | 6             | 0           | 9.525203                | 2.753548 | 1.163843 |
| 13            | 1             | 0           | 10.602156               | 2.783420 | 1.099075 |
| 14            | 6             | 0           | 8.685946                | 1.702123 | 0.837025 |
| 15            | 1             | 0           | 8.963388                | 0.730495 | 0.460931 |
| 16            | 6             | 0           | 7.375194                | 2.139730 | 1.089842 |

|    |   |   |           |          |          |
|----|---|---|-----------|----------|----------|
| 17 | 1 | 0 | 6.444048  | 1.609024 | 0.960569 |
| 18 | 1 | 0 | 4.919645  | 6.612202 | 2.905266 |
| 19 | 1 | 0 | 10.060928 | 5.389447 | 2.093819 |
| 20 | 1 | 0 | 9.046459  | 7.866511 | 3.075308 |
| 21 | 6 | 0 | 6.401345  | 9.078070 | 3.706698 |
| 22 | 1 | 0 | 5.741286  | 9.585270 | 2.998230 |
| 23 | 1 | 0 | 5.854785  | 8.978324 | 4.648056 |
| 24 | 1 | 0 | 7.258038  | 9.728165 | 3.886909 |

DFT wb97xd/6-31++G(d,p) optimised ground state structure:

| Center<br>Number | Atomic<br>Number | Atomic<br>Type | Coordinates (Angstroms) |          |          |
|------------------|------------------|----------------|-------------------------|----------|----------|
|                  |                  |                | X                       | Y        | Z        |
| 1                | 5                | 0              | 6.142351                | 4.242192 | 1.955946 |
| 2                | 9                | 0              | 5.304371                | 4.418015 | 0.859813 |
| 3                | 9                | 0              | 5.465851                | 3.633772 | 3.007994 |
| 4                | 7                | 0              | 6.707257                | 5.626655 | 2.418923 |
| 5                | 7                | 0              | 7.385847                | 3.389530 | 1.551060 |
| 6                | 6                | 0              | 5.997451                | 6.665093 | 2.856046 |
| 7                | 6                | 0              | 6.842566                | 7.751799 | 3.189900 |
| 8                | 6                | 0              | 8.131711                | 7.318438 | 2.930452 |
| 9                | 6                | 0              | 8.048416                | 5.988064 | 2.447535 |
| 10               | 6                | 0              | 9.024840                | 5.092085 | 2.045651 |
| 11               | 6                | 0              | 8.707261                | 3.811230 | 1.602721 |
| 12               | 6                | 0              | 9.527401                | 2.751997 | 1.154514 |
| 13               | 1                | 0              | 10.605975               | 2.783558 | 1.083136 |
| 14               | 6                | 0              | 8.686045                | 1.695970 | 0.835355 |
| 15               | 1                | 0              | 8.964323                | 0.722193 | 0.460153 |
| 16               | 6                | 0              | 7.374266                | 2.133347 | 1.095292 |
| 17               | 1                | 0              | 6.440324                | 1.602030 | 0.974180 |
| 18               | 1                | 0              | 4.918607                | 6.604774 | 2.919575 |
| 19               | 1                | 0              | 10.066427               | 5.395936 | 2.076884 |
| 20               | 1                | 0              | 9.047847                | 7.878362 | 3.066878 |
| 21               | 6                | 0              | 6.397383                | 9.084816 | 3.709278 |
| 22               | 1                | 0              | 5.822886                | 9.635093 | 2.957144 |
| 23               | 1                | 0              | 5.763469                | 8.975313 | 4.594526 |
| 24               | 1                | 0              | 7.257726                | 9.698193 | 3.987579 |

DFT B3LYP/6-31G(d) optimised 1<sup>st</sup> excited-state structure:

| Center<br>Number | Atomic<br>Number | Atomic<br>Type | Coordinates (Angstroms) |          |          |
|------------------|------------------|----------------|-------------------------|----------|----------|
|                  |                  |                | X                       | Y        | Z        |
| 1                | 5                | 0              | 6.222537                | 4.119084 | 2.310536 |
| 2                | 9                | 0              | 5.090384                | 4.155895 | 1.519737 |
| 3                | 9                | 0              | 5.967003                | 3.552008 | 3.549129 |
| 4                | 7                | 0              | 6.733480                | 5.592527 | 2.555311 |
| 5                | 7                | 0              | 7.393278                | 3.423175 | 1.584960 |
| 6                | 6                | 0              | 5.933648                | 6.673289 | 2.838723 |
| 7                | 6                | 0              | 6.731143                | 7.754674 | 3.114206 |
| 8                | 6                | 0              | 8.145267                | 7.264652 | 2.951654 |
| 9                | 6                | 0              | 8.084796                | 5.952716 | 2.611386 |
| 10               | 6                | 0              | 9.123698                | 4.992334 | 2.235686 |
| 11               | 6                | 0              | 8.753694                | 3.791023 | 1.680243 |
| 12               | 6                | 0              | 9.518421                | 2.755879 | 1.050146 |
| 13               | 1                | 0              | 10.594946               | 2.757901 | 0.946350 |
| 14               | 6                | 0              | 8.618443                | 1.812449 | 0.571937 |
| 15               | 1                | 0              | 8.848311                | 0.905145 | 0.029240 |
| 16               | 6                | 0              | 7.323943                | 2.250681 | 0.916690 |
| 17               | 1                | 0              | 6.368208                | 1.779128 | 0.735222 |
| 18               | 1                | 0              | 4.859081                | 6.573091 | 2.841254 |
| 19               | 1                | 0              | 10.163873               | 5.278998 | 2.315437 |
| 20               | 1                | 0              | 9.034398                | 7.870122 | 3.074630 |
| 21               | 6                | 0              | 6.345364                | 9.129616 | 3.506652 |
| 22               | 1                | 0              | 6.751169                | 9.870274 | 2.800363 |
| 23               | 1                | 0              | 5.260085                | 9.251147 | 3.551366 |

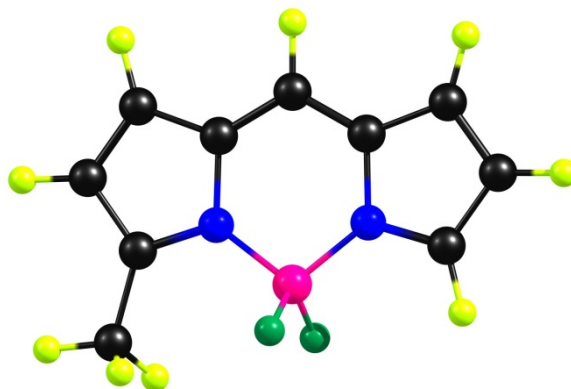

Figure S2-5: DFT B3LYP/6-31G(d) optimised ground-state structure of **1.04**

**DFT B3LYP/6-31G(d) optimised ground state structure:**

| Center Number | Atomic Number | Atomic Type | Coordinates (Angstroms) |          |          |
|---------------|---------------|-------------|-------------------------|----------|----------|
|               |               |             | X                       | Y        | Z        |
| 1             | 5             | 0           | 6.123455                | 4.246824 | 1.914412 |
| 2             | 9             | 0           | 5.319340                | 4.438106 | 0.802543 |
| 3             | 9             | 0           | 5.429885                | 3.619657 | 2.936696 |
| 4             | 7             | 0           | 6.681852                | 5.630327 | 2.416061 |
| 5             | 7             | 0           | 7.382937                | 3.396082 | 1.522915 |
| 6             | 6             | 0           | 5.955883                | 6.675521 | 2.854500 |
| 7             | 6             | 0           | 6.829446                | 7.736287 | 3.216059 |
| 8             | 6             | 0           | 8.123152                | 7.304924 | 2.983619 |
| 9             | 6             | 0           | 8.032817                | 5.979705 | 2.480072 |
| 10            | 6             | 0           | 9.018144                | 5.085630 | 2.086159 |
| 11            | 6             | 0           | 8.709753                | 3.810146 | 1.612985 |
| 12            | 6             | 0           | 9.536664                | 2.750224 | 1.163686 |
| 13            | 1             | 0           | 10.617643               | 2.776724 | 1.117859 |
| 14            | 6             | 0           | 8.696327                | 1.702524 | 0.805426 |
| 15            | 1             | 0           | 8.978635                | 0.732930 | 0.418974 |
| 16            | 6             | 0           | 7.377789                | 2.142689 | 1.042517 |
| 17            | 1             | 0           | 6.444671                | 1.617130 | 0.889299 |
| 18            | 1             | 0           | 10.059258               | 5.388035 | 2.148205 |
| 19            | 1             | 0           | 9.044113                | 7.850104 | 3.144991 |
| 20            | 1             | 0           | 6.511095                | 8.696011 | 3.600607 |
| 21            | 6             | 0           | 4.464827                | 6.641360 | 2.918633 |
| 22            | 1             | 0           | 4.044340                | 6.450507 | 1.925257 |
| 23            | 1             | 0           | 4.129213                | 5.822131 | 3.563811 |
| 24            | 1             | 0           | 4.071858                | 7.586376 | 3.301395 |

**DFT B3LYP/6-31++G(d,p) optimised ground state structure:**

| Center Number | Atomic Number | Atomic Type | Coordinates (Angstroms) |          |          |
|---------------|---------------|-------------|-------------------------|----------|----------|
|               |               |             | X                       | Y        | Z        |
| 1             | 5             | 0           | 6.134586                | 4.242544 | 1.912981 |
| 2             | 9             | 0           | 5.316109                | 4.427024 | 0.796544 |
| 3             | 9             | 0           | 5.427829                | 3.607535 | 2.936508 |
| 4             | 7             | 0           | 6.678055                | 5.626735 | 2.414672 |
| 5             | 7             | 0           | 7.386939                | 3.392497 | 1.522079 |
| 6             | 6             | 0           | 5.951800                | 6.671597 | 2.852712 |
| 7             | 6             | 0           | 6.826988                | 7.730221 | 3.212425 |
| 8             | 6             | 0           | 8.118989                | 7.298708 | 2.979733 |
| 9             | 6             | 0           | 8.029369                | 5.974643 | 2.477363 |

|    |   |   |           |          |          |
|----|---|---|-----------|----------|----------|
| 10 | 6 | 0 | 9.016065  | 5.085264 | 2.085274 |
| 11 | 6 | 0 | 8.710625  | 3.810516 | 1.613061 |
| 12 | 6 | 0 | 9.538599  | 2.753370 | 1.165043 |
| 13 | 1 | 0 | 10.616897 | 2.781147 | 1.119393 |
| 14 | 6 | 0 | 8.700784  | 1.704181 | 0.807012 |
| 15 | 1 | 0 | 8.985276  | 0.737636 | 0.422051 |
| 16 | 6 | 0 | 7.382493  | 2.138882 | 1.042276 |
| 17 | 1 | 0 | 6.453737  | 1.610382 | 0.888372 |
| 18 | 1 | 0 | 10.053995 | 5.390257 | 2.147888 |
| 19 | 1 | 0 | 9.037757  | 7.842763 | 3.140116 |
| 20 | 1 | 0 | 6.511168  | 8.688284 | 3.595799 |
| 21 | 6 | 0 | 4.463510  | 6.652121 | 2.922940 |
| 22 | 1 | 0 | 4.033696  | 6.469685 | 1.934428 |
| 23 | 1 | 0 | 4.119172  | 5.842582 | 3.571982 |
| 24 | 1 | 0 | 4.088655  | 7.601377 | 3.306025 |

DFT mpw1pw91/6-31++G(d,p) optimised ground state structure:

| Center Number | Atomic Number | Atomic Type | Coordinates (Angstroms) |          |          |
|---------------|---------------|-------------|-------------------------|----------|----------|
|               |               |             | X                       | Y        | Z        |
| 1             | 5             | 0           | 6.138012                | 4.248418 | 1.914557 |
| 2             | 9             | 0           | 5.324992                | 4.433802 | 0.802659 |
| 3             | 9             | 0           | 5.435561                | 3.616902 | 2.934011 |
| 4             | 7             | 0           | 6.682435                | 5.625289 | 2.413990 |
| 5             | 7             | 0           | 7.385694                | 3.401523 | 1.525224 |
| 6             | 6             | 0           | 5.957851                | 6.663913 | 2.849703 |
| 7             | 6             | 0           | 6.827764                | 7.721294 | 3.209575 |
| 8             | 6             | 0           | 8.116254                | 7.291679 | 2.977846 |
| 9             | 6             | 0           | 8.025324                | 5.971933 | 2.476888 |
| 10            | 6             | 0           | 9.009965                | 5.085645 | 2.085978 |
| 11            | 6             | 0           | 8.702463                | 3.814817 | 1.615010 |
| 12            | 6             | 0           | 9.527783                | 2.761233 | 1.168586 |
| 13            | 1             | 0           | 10.605762               | 2.788487 | 1.122946 |
| 14            | 6             | 0           | 8.690812                | 1.716340 | 0.811967 |
| 15            | 1             | 0           | 8.972676                | 0.749449 | 0.427004 |
| 16            | 6             | 0           | 7.377906                | 2.153726 | 1.047761 |
| 17            | 1             | 0           | 6.447416                | 1.628396 | 0.894906 |
| 18            | 1             | 0           | 10.047576               | 5.389753 | 2.148470 |
| 19            | 1             | 0           | 9.035031                | 7.835014 | 3.138252 |
| 20            | 1             | 0           | 6.510206                | 8.678412 | 3.592838 |
| 21            | 6             | 0           | 4.476496                | 6.638667 | 2.917115 |
| 22            | 1             | 0           | 4.051734                | 6.454254 | 1.927882 |
| 23            | 1             | 0           | 4.136836                | 5.826364 | 3.563493 |
| 24            | 1             | 0           | 4.096543                | 7.584642 | 3.300020 |

DFT wb97xd/6-31++G(d,p) optimised ground state structure:

| Center Number | Atomic Number | Atomic Type | Coordinates (Angstroms) |          |          |
|---------------|---------------|-------------|-------------------------|----------|----------|
|               |               |             | X                       | Y        | Z        |
| 1             | 5             | 0           | 6.138230                | 4.237605 | 1.936302 |
| 2             | 9             | 0           | 5.301515                | 4.411482 | 0.835568 |
| 3             | 9             | 0           | 5.457723                | 3.605671 | 2.976727 |
| 4             | 7             | 0           | 6.682119                | 5.623707 | 2.418815 |
| 5             | 7             | 0           | 7.385488                | 3.396596 | 1.531088 |
| 6             | 6             | 0           | 5.958214                | 6.664268 | 2.848344 |
| 7             | 6             | 0           | 6.827115                | 7.727510 | 3.203984 |
| 8             | 6             | 0           | 8.117852                | 7.298808 | 2.974441 |
| 9             | 6             | 0           | 8.029671                | 5.973770 | 2.479440 |
| 10            | 6             | 0           | 9.014174                | 5.086260 | 2.087916 |
| 11            | 6             | 0           | 8.705958                | 3.811115 | 1.616941 |
| 12            | 6             | 0           | 9.530680                | 2.759020 | 1.165258 |
| 13            | 1             | 0           | 10.610479               | 2.786978 | 1.114567 |
| 14            | 6             | 0           | 8.691352                | 1.711516 | 0.808782 |
| 15            | 1             | 0           | 8.974810                | 0.744714 | 0.419706 |
| 16            | 6             | 0           | 7.377405                | 2.147775 | 1.050880 |

|    |   |   |           |          |          |
|----|---|---|-----------|----------|----------|
| 17 | 1 | 0 | 6.444591  | 1.621954 | 0.901399 |
| 18 | 1 | 0 | 10.053988 | 5.391626 | 2.147025 |
| 19 | 1 | 0 | 9.036721  | 7.846776 | 3.132645 |
| 20 | 1 | 0 | 6.506153  | 8.687462 | 3.582804 |
| 21 | 6 | 0 | 4.469865  | 6.644156 | 2.903133 |
| 22 | 1 | 0 | 4.054776  | 6.597441 | 1.891926 |
| 23 | 1 | 0 | 4.114833  | 5.760962 | 3.440081 |
| 24 | 1 | 0 | 4.099383  | 7.542778 | 3.398909 |

**DFT B3LYP/6-31G(d) optimised 1<sup>st</sup> excited-state structure:**

| Center Number | Atomic Number | Atomic Type | Coordinates (Angstroms) |          |          |
|---------------|---------------|-------------|-------------------------|----------|----------|
|               |               |             | X                       | Y        | Z        |
| 1             | 5             | 0           | 6.155968                | 4.262965 | 1.957989 |
| 2             | 9             | 0           | 5.327382                | 4.385334 | 0.851055 |
| 3             | 9             | 0           | 5.512320                | 3.590877 | 2.988354 |
| 4             | 7             | 0           | 6.714896                | 5.622790 | 2.415124 |
| 5             | 7             | 0           | 7.408966                | 3.402789 | 1.528755 |
| 6             | 6             | 0           | 5.959459                | 6.673102 | 2.838193 |
| 7             | 6             | 0           | 6.813985                | 7.738407 | 3.205885 |
| 8             | 6             | 0           | 8.123586                | 7.330546 | 3.005268 |
| 9             | 6             | 0           | 8.076325                | 5.989883 | 2.502913 |
| 10            | 6             | 0           | 9.085536                | 5.133655 | 2.138012 |
| 11            | 6             | 0           | 8.755052                | 3.806133 | 1.626945 |
| 12            | 6             | 0           | 9.522726                | 2.786606 | 1.174979 |
| 13            | 1             | 0           | 10.602127               | 2.759793 | 1.110208 |
| 14            | 6             | 0           | 8.594767                | 1.681241 | 0.769522 |
| 15            | 1             | 0           | 8.889867                | 0.721914 | 0.367064 |
| 16            | 6             | 0           | 7.326282                | 2.129769 | 1.011165 |
| 17            | 1             | 0           | 6.365984                | 1.660571 | 0.865758 |
| 18            | 1             | 0           | 10.123641               | 5.428675 | 2.211696 |
| 19            | 1             | 0           | 9.030735                | 7.892661 | 3.180311 |
| 20            | 1             | 0           | 6.475115                | 8.696837 | 3.577756 |
| 21            | 6             | 0           | 4.470442                | 6.615747 | 2.879261 |
| 22            | 1             | 0           | 4.058614                | 6.415575 | 1.882521 |
| 23            | 1             | 0           | 4.129794                | 5.796801 | 3.525265 |
| 24            | 1             | 0           | 4.059523                | 7.557282 | 3.252682 |

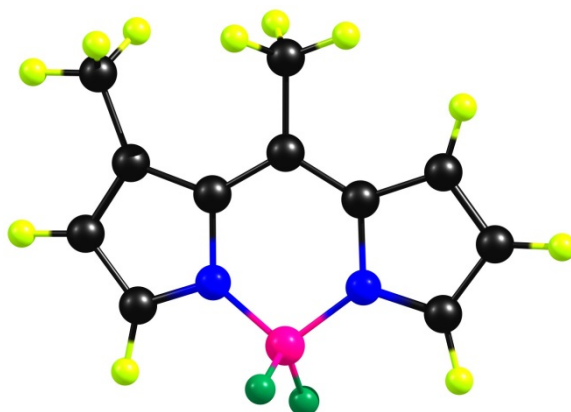

Figure S2-6: DFT B3LYP/6-31G(d) optimised ground-state structure of **2.01**

**DFT B3LYP/6-31G(d) optimised ground state structure:**

| Center Number | Atomic Number | Atomic Type | Coordinates (Angstroms) |          |          |
|---------------|---------------|-------------|-------------------------|----------|----------|
|               |               |             | X                       | Y        | Z        |
| 1             | 5             | 0           | 6.160039                | 4.183323 | 2.113346 |
| 2             | 9             | 0           | 5.168511                | 4.278924 | 1.155707 |

|    |   |   |           |          |          |
|----|---|---|-----------|----------|----------|
| 3  | 9 | 0 | 5.694727  | 3.581383 | 3.269820 |
| 4  | 7 | 0 | 6.727975  | 5.604603 | 2.445874 |
| 5  | 7 | 0 | 7.384196  | 3.389491 | 1.554046 |
| 6  | 6 | 0 | 5.989597  | 6.662128 | 2.797668 |
| 7  | 6 | 0 | 6.821581  | 7.739470 | 3.148483 |
| 8  | 6 | 0 | 8.140139  | 7.316834 | 3.005169 |
| 9  | 6 | 0 | 8.077221  | 5.955603 | 2.552783 |
| 10 | 6 | 0 | 9.073596  | 5.037253 | 2.183014 |
| 11 | 6 | 0 | 8.717998  | 3.775146 | 1.671884 |
| 12 | 6 | 0 | 9.516106  | 2.723252 | 1.145742 |
| 13 | 1 | 0 | 10.594988 | 2.712755 | 1.077742 |
| 14 | 6 | 0 | 8.652410  | 1.724329 | 0.714437 |
| 15 | 1 | 0 | 8.914734  | 0.782755 | 0.252085 |
| 16 | 6 | 0 | 7.346386  | 2.175694 | 0.987188 |
| 17 | 1 | 0 | 6.398926  | 1.686135 | 0.805461 |
| 18 | 1 | 0 | 6.492632  | 8.720286 | 3.465621 |
| 19 | 1 | 0 | 4.909363  | 6.603472 | 2.786767 |
| 20 | 6 | 0 | 10.531974 | 5.397666 | 2.296788 |
| 21 | 1 | 0 | 10.779629 | 6.244069 | 1.646499 |
| 22 | 1 | 0 | 10.781996 | 5.693925 | 3.320687 |
| 23 | 1 | 0 | 11.176721 | 4.562569 | 2.022959 |
| 24 | 6 | 0 | 9.345231  | 8.169472 | 3.271198 |
| 25 | 1 | 0 | 9.991572  | 7.746522 | 4.049934 |
| 26 | 1 | 0 | 9.966398  | 8.305216 | 2.377334 |
| 27 | 1 | 0 | 9.032330  | 9.162449 | 3.607223 |

DFT B3LYP/6-31++G(d,p) optimised ground state structure:

| Center Number | Atomic Number | Atomic Type | Coordinates (Angstroms) |          |          |
|---------------|---------------|-------------|-------------------------|----------|----------|
|               |               |             | X                       | Y        | Z        |
| 1             | 5             | 0           | 6.153952                | 4.236509 | 1.977538 |
| 2             | 9             | 0           | 5.309006                | 4.425451 | 0.883191 |
| 3             | 9             | 0           | 5.466407                | 3.618159 | 3.023189 |
| 4             | 7             | 0           | 6.730811                | 5.606278 | 2.452900 |
| 5             | 7             | 0           | 7.389326                | 3.383434 | 1.566193 |
| 6             | 6             | 0           | 5.996000                | 6.637692 | 2.878542 |
| 7             | 6             | 0           | 6.829745                | 7.707182 | 3.241850 |
| 8             | 6             | 0           | 8.144675                | 7.307999 | 3.027343 |
| 9             | 6             | 0           | 8.080250                | 5.966602 | 2.523236 |
| 10            | 6             | 0           | 9.074531                | 5.061086 | 2.126937 |
| 11            | 6             | 0           | 8.719192                | 3.785814 | 1.653377 |
| 12            | 6             | 0           | 9.520784                | 2.709647 | 1.191181 |
| 13            | 1             | 0           | 10.597102               | 2.697353 | 1.128635 |
| 14            | 6             | 0           | 8.663082                | 1.677967 | 0.833087 |
| 15            | 1             | 0           | 8.930304                | 0.709716 | 0.440150 |
| 16            | 6             | 0           | 7.356619                | 2.134707 | 1.080405 |
| 17            | 1             | 0           | 6.415471                | 1.626913 | 0.932197 |
| 18            | 1             | 0           | 6.502513                | 8.664206 | 3.618810 |
| 19            | 1             | 0           | 4.918570                | 6.571803 | 2.906690 |
| 20            | 6             | 0           | 10.529541               | 5.435811 | 2.198530 |
| 21            | 1             | 0           | 10.736268               | 6.312432 | 1.580022 |
| 22            | 1             | 0           | 10.816340               | 5.685881 | 3.222706 |
| 23            | 1             | 0           | 11.169563               | 4.625598 | 1.858409 |
| 24            | 6             | 0           | 9.347781                | 8.161479 | 3.290566 |
| 25            | 1             | 0           | 10.018418               | 7.713489 | 4.029690 |
| 26            | 1             | 0           | 9.935414                | 8.337883 | 2.384811 |
| 27            | 1             | 0           | 9.035312                | 9.133630 | 3.675273 |

DFT mpw1pw91/6-31++G(d,p) optimised ground state structure:

| Center Number | Atomic Number | Atomic Type | Coordinates (Angstroms) |          |          |
|---------------|---------------|-------------|-------------------------|----------|----------|
|               |               |             | X                       | Y        | Z        |
| 1             | 5             | 0           | 6.166756                | 4.220992 | 2.031026 |
| 2             | 9             | 0           | 5.256381                | 4.369026 | 0.994147 |
| 3             | 9             | 0           | 5.567921                | 3.608182 | 3.124814 |

|    |   |   |           |          |          |
|----|---|---|-----------|----------|----------|
| 4  | 7 | 0 | 6.737253  | 5.606318 | 2.446524 |
| 5  | 7 | 0 | 7.392997  | 3.394653 | 1.562454 |
| 6  | 6 | 0 | 6.002907  | 6.642525 | 2.841788 |
| 7  | 6 | 0 | 6.832146  | 7.712504 | 3.199213 |
| 8  | 6 | 0 | 8.144402  | 7.303583 | 3.013492 |
| 9  | 6 | 0 | 8.078284  | 5.960204 | 2.531586 |
| 10 | 6 | 0 | 9.071476  | 5.054558 | 2.148243 |
| 11 | 6 | 0 | 8.715764  | 3.788602 | 1.662163 |
| 12 | 6 | 0 | 9.515768  | 2.727524 | 1.178698 |
| 13 | 1 | 0 | 10.592002 | 2.716928 | 1.115381 |
| 14 | 6 | 0 | 8.659282  | 1.709990 | 0.793378 |
| 15 | 1 | 0 | 8.924482  | 0.752264 | 0.375182 |
| 16 | 6 | 0 | 7.357638  | 2.163616 | 1.049277 |
| 17 | 1 | 0 | 6.414990  | 1.662694 | 0.889200 |
| 18 | 1 | 0 | 6.503542  | 8.677515 | 3.552846 |
| 19 | 1 | 0 | 4.925309  | 6.578793 | 2.854974 |
| 20 | 6 | 0 | 10.518622 | 5.420630 | 2.238536 |
| 21 | 1 | 0 | 10.737437 | 6.293406 | 1.620123 |
| 22 | 1 | 0 | 10.789297 | 5.673681 | 3.265499 |
| 23 | 1 | 0 | 11.158858 | 4.605802 | 1.911934 |
| 24 | 6 | 0 | 9.344393  | 8.148768 | 3.276735 |
| 25 | 1 | 0 | 10.004443 | 7.704542 | 4.026147 |
| 26 | 1 | 0 | 9.939957  | 8.311315 | 2.374639 |
| 27 | 1 | 0 | 9.034671  | 9.126109 | 3.647461 |

DFT wb97xd/6-31++G(d,p) optimised ground state structure:

| Center Number | Atomic Number | Atomic Type | Coordinates (Angstroms) |          |          |
|---------------|---------------|-------------|-------------------------|----------|----------|
|               |               |             | X                       | Y        | Z        |
| 1             | 5             | 0           | 6.163902                | 4.217606 | 2.032453 |
| 2             | 9             | 0           | 5.252649                | 4.370348 | 0.990876 |
| 3             | 9             | 0           | 5.561068                | 3.600401 | 3.127164 |
| 4             | 7             | 0           | 6.734151                | 5.603184 | 2.453438 |
| 5             | 7             | 0           | 7.391170                | 3.391600 | 1.562060 |
| 6             | 6             | 0           | 5.999778                | 6.639907 | 2.850253 |
| 7             | 6             | 0           | 6.830486                | 7.712755 | 3.207546 |
| 8             | 6             | 0           | 8.143997                | 7.303212 | 3.021026 |
| 9             | 6             | 0           | 8.079091                | 5.959031 | 2.539153 |
| 10            | 6             | 0           | 9.072563                | 5.053460 | 2.151350 |
| 11            | 6             | 0           | 8.717819                | 3.785388 | 1.661111 |
| 12            | 6             | 0           | 9.516830                | 2.725949 | 1.170373 |
| 13            | 1             | 0           | 10.595157               | 2.715088 | 1.103695 |
| 14            | 6             | 0           | 8.657690                | 1.708286 | 0.780840 |
| 15            | 1             | 0           | 8.924049                | 0.751757 | 0.355984 |
| 16            | 6             | 0           | 7.354851                | 2.161321 | 1.042762 |
| 17            | 1             | 0           | 6.409141                | 1.661878 | 0.884015 |
| 18            | 1             | 0           | 6.501610                | 8.680175 | 3.560226 |
| 19            | 1             | 0           | 4.920479                | 6.575056 | 2.862846 |
| 20            | 6             | 0           | 10.523375               | 5.428712 | 2.231269 |
| 21            | 1             | 0           | 10.743428               | 6.240660 | 1.531598 |
| 22            | 1             | 0           | 10.778873               | 5.779062 | 3.233775 |
| 23            | 1             | 0           | 11.172270               | 4.588784 | 1.989520 |
| 24            | 6             | 0           | 9.350250                | 8.148359 | 3.289023 |
| 25            | 1             | 0           | 9.963693                | 7.734596 | 4.096392 |
| 26            | 1             | 0           | 9.989914                | 8.247176 | 2.406936 |
| 27            | 1             | 0           | 9.038694                | 9.150974 | 3.589774 |

DFT B3LYP/6-31G(d) optimised 1<sup>st</sup> excited-state structure:

| Center Number | Atomic Number | Atomic Type | Coordinates (Angstroms) |          |          |
|---------------|---------------|-------------|-------------------------|----------|----------|
|               |               |             | X                       | Y        | Z        |
| 1             | 5             | 0           | 6.243243                | 4.109254 | 2.362143 |
| 2             | 9             | 0           | 5.074315                | 4.049306 | 1.628656 |
| 3             | 9             | 0           | 6.115647                | 3.493975 | 3.597882 |
| 4             | 7             | 0           | 6.760161                | 5.552436 | 2.474200 |



|    |   |   |           |          |           |
|----|---|---|-----------|----------|-----------|
| 5  | 7 | 0 | 7.392676  | 3.376638 | 1.581437  |
| 6  | 6 | 0 | 5.981857  | 6.633664 | 2.692636  |
| 7  | 6 | 0 | 6.784304  | 7.740307 | 3.006994  |
| 8  | 6 | 0 | 8.119495  | 7.338948 | 2.985907  |
| 9  | 6 | 0 | 8.118448  | 5.937931 | 2.623852  |
| 10 | 6 | 0 | 9.128751  | 5.036949 | 2.339015  |
| 11 | 6 | 0 | 8.740821  | 3.771648 | 1.674269  |
| 12 | 6 | 0 | 9.476294  | 2.875956 | 0.973629  |
| 13 | 1 | 0 | 10.546451 | 2.878941 | 0.820911  |
| 14 | 6 | 0 | 8.522697  | 1.867640 | 0.410823  |
| 15 | 1 | 0 | 8.791699  | 0.996841 | -0.171330 |
| 16 | 6 | 0 | 7.269487  | 2.251957 | 0.808208  |
| 17 | 1 | 0 | 6.299920  | 1.811852 | 0.634979  |
| 18 | 1 | 0 | 6.424544  | 8.738385 | 3.223377  |
| 19 | 1 | 0 | 4.905398  | 6.552352 | 2.640024  |
| 20 | 6 | 0 | 10.594246 | 5.270181 | 2.536699  |
| 21 | 1 | 0 | 11.127355 | 5.398946 | 1.580487  |
| 22 | 1 | 0 | 10.795138 | 6.150628 | 3.145815  |
| 23 | 1 | 0 | 11.059224 | 4.408895 | 3.036971  |
| 24 | 6 | 0 | 9.295127  | 8.235547 | 3.228877  |
| 25 | 1 | 0 | 9.862845  | 7.951438 | 4.125460  |
| 26 | 1 | 0 | 10.001237 | 8.238151 | 2.388450  |
| 27 | 1 | 0 | 8.955600  | 9.265955 | 3.375087  |

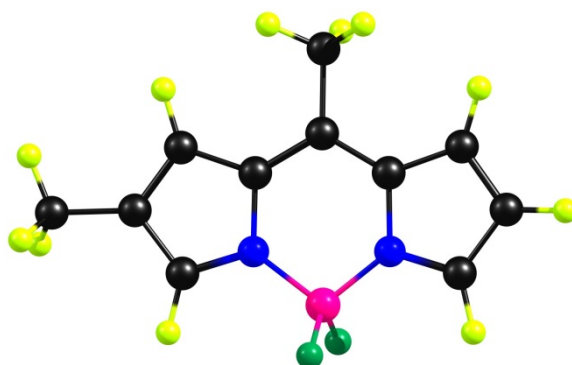

Figure S2-7: DFT B3LYP/6-31G(d) optimised ground-state structure of **2.02**

**DFT B3LYP/6-31G(d) optimised ground state structure:**

| Center Number | Atomic Number | Atomic Type | Coordinates (Angstroms) |          |          |
|---------------|---------------|-------------|-------------------------|----------|----------|
|               |               |             | X                       | Y        | Z        |
| 1             | 5             | 0           | 6.137227                | 4.317813 | 1.761526 |
| 2             | 9             | 0           | 5.527307                | 4.594567 | 0.551246 |
| 3             | 9             | 0           | 5.261949                | 3.720996 | 2.648147 |
| 4             | 7             | 0           | 6.710754                | 5.642059 | 2.379935 |
| 5             | 7             | 0           | 7.389555                | 3.404889 | 1.534501 |
| 6             | 6             | 0           | 5.988229                | 6.675120 | 2.826316 |
| 7             | 6             | 0           | 6.827681                | 7.740071 | 3.240305 |
| 8             | 6             | 0           | 8.126700                | 7.298748 | 3.021137 |
| 9             | 6             | 0           | 8.058948                | 5.984057 | 2.483433 |
| 10            | 6             | 0           | 9.063546                | 5.079892 | 2.118297 |
| 11            | 6             | 0           | 8.721472                | 3.796763 | 1.658464 |
| 12            | 6             | 0           | 9.534350                | 2.695139 | 1.285338 |
| 13            | 1             | 0           | 10.615718               | 2.679193 | 1.279984 |
| 14            | 6             | 0           | 8.682339                | 1.652032 | 0.941959 |
| 15            | 1             | 0           | 8.956372                | 0.658566 | 0.614685 |
| 16            | 6             | 0           | 7.368984                | 2.132682 | 1.110357 |
| 17            | 1             | 0           | 6.427732                | 1.624871 | 0.947350 |
| 18            | 1             | 0           | 4.906779                | 6.622691 | 2.836321 |
| 19            | 6             | 0           | 10.511697               | 5.486548 | 2.193232 |
| 20            | 1             | 0           | 10.851208               | 5.859696 | 1.218574 |
| 21            | 1             | 0           | 10.669832               | 6.279472 | 2.926998 |
| 22            | 1             | 0           | 11.148953               | 4.640587 | 2.462535 |

|    |   |   |          |          |          |
|----|---|---|----------|----------|----------|
| 23 | 1 | 0 | 9.032455 | 7.853265 | 3.228992 |
| 24 | 6 | 0 | 6.378483 | 9.057119 | 3.802578 |
| 25 | 1 | 0 | 7.236676 | 9.695798 | 4.033299 |
| 26 | 1 | 0 | 5.738926 | 9.602523 | 3.097602 |
| 27 | 1 | 0 | 5.802529 | 8.928466 | 4.727427 |

**DFT B3LYP/6-31++G(d,p) optimised ground state structure:**

| Center<br>Number | Atomic<br>Number | Atomic<br>Type | Coordinates (Angstroms) |          |          |
|------------------|------------------|----------------|-------------------------|----------|----------|
|                  |                  |                | X                       | Y        | Z        |
| 1                | 5                | 0              | 6.145103                | 4.263941 | 1.910398 |
| 2                | 9                | 0              | 5.321480                | 4.457501 | 0.802252 |
| 3                | 9                | 0              | 5.441318                | 3.643907 | 2.943153 |
| 4                | 7                | 0              | 6.712750                | 5.635642 | 2.403165 |
| 5                | 7                | 0              | 7.391256                | 3.410896 | 1.519449 |
| 6                | 6                | 0              | 5.989110                | 6.687853 | 2.798912 |
| 7                | 6                | 0              | 6.829867                | 7.752204 | 3.205410 |
| 8                | 6                | 0              | 8.128160                | 7.290745 | 3.038918 |
| 9                | 6                | 0              | 8.060650                | 5.963917 | 2.533762 |
| 10               | 6                | 0              | 9.064603                | 5.059661 | 2.176286 |
| 11               | 6                | 0              | 8.721084                | 3.794447 | 1.673558 |
| 12               | 6                | 0              | 9.533418                | 2.723047 | 1.227205 |
| 13               | 1                | 0              | 10.612111               | 2.709795 | 1.215842 |
| 14               | 6                | 0              | 8.682634                | 1.708210 | 0.806258 |
| 15               | 1                | 0              | 8.957380                | 0.745715 | 0.404410 |
| 16               | 6                | 0              | 7.370137                | 2.172499 | 1.005012 |
| 17               | 1                | 0              | 6.432849                | 1.675508 | 0.804790 |
| 18               | 1                | 0              | 4.909190                | 6.649327 | 2.781892 |
| 19               | 6                | 0              | 10.512599               | 5.451120 | 2.286009 |
| 20               | 1                | 0              | 10.878703               | 5.808009 | 1.317756 |
| 21               | 1                | 0              | 10.659372               | 6.248102 | 3.013480 |
| 22               | 1                | 0              | 11.129965               | 4.601682 | 2.579827 |
| 23               | 1                | 0              | 9.032459                | 7.841189 | 3.249957 |
| 24               | 6                | 0              | 6.379211                | 9.091041 | 3.708252 |
| 25               | 1                | 0              | 7.235183                | 9.717998 | 3.965057 |
| 26               | 1                | 0              | 5.789340                | 9.624589 | 2.956662 |
| 27               | 1                | 0              | 5.756466                | 8.995079 | 4.602866 |

**DFT mpw1pw91/6-31++G(d,p) optimised ground state structure:**

| Center<br>Number | Atomic<br>Number | Atomic<br>Type | Coordinates (Angstroms) |          |          |
|------------------|------------------|----------------|-------------------------|----------|----------|
|                  |                  |                | X                       | Y        | Z        |
| 1                | 5                | 0              | 6.153055                | 4.257348 | 1.942444 |
| 2                | 9                | 0              | 5.296490                | 4.433217 | 0.865835 |
| 3                | 9                | 0              | 5.497387                | 3.638747 | 2.998429 |
| 4                | 7                | 0              | 6.718979                | 5.633043 | 2.407084 |
| 5                | 7                | 0              | 7.393020                | 3.421266 | 1.519241 |
| 6                | 6                | 0              | 5.997721                | 6.683577 | 2.790500 |
| 7                | 6                | 0              | 6.834540                | 7.746702 | 3.194660 |
| 8                | 6                | 0              | 8.128994                | 7.282118 | 3.039774 |
| 9                | 6                | 0              | 8.058583                | 5.957534 | 2.543361 |
| 10               | 6                | 0              | 9.059987                | 5.055495 | 2.189151 |
| 11               | 6                | 0              | 8.715268                | 3.798351 | 1.678010 |
| 12               | 6                | 0              | 9.526316                | 2.738595 | 1.217895 |
| 13               | 1                | 0              | 10.604897               | 2.727373 | 1.204813 |
| 14               | 6                | 0              | 8.677325                | 1.733896 | 0.782228 |
| 15               | 1                | 0              | 8.950376                | 0.778203 | 0.364330 |
| 16               | 6                | 0              | 7.369685                | 2.196403 | 0.988656 |
| 17               | 1                | 0              | 6.431062                | 1.704885 | 0.782491 |
| 18               | 1                | 0              | 4.918167                | 6.645142 | 2.767145 |
| 19               | 6                | 0              | 10.500302               | 5.440346 | 2.306547 |
| 20               | 1                | 0              | 10.871520               | 5.793364 | 1.339971 |
| 21               | 1                | 0              | 10.644516               | 6.237660 | 3.032986 |
| 22               | 1                | 0              | 11.111618               | 4.589062 | 2.604815 |
| 23               | 1                | 0              | 9.033790                | 7.831526 | 3.250693 |

|    |   |   |          |          |          |
|----|---|---|----------|----------|----------|
| 24 | 6 | 0 | 6.384945 | 9.083598 | 3.682627 |
| 25 | 1 | 0 | 7.239275 | 9.709154 | 3.943533 |
| 26 | 1 | 0 | 5.804427 | 9.612931 | 2.922481 |
| 27 | 1 | 0 | 5.754156 | 8.994085 | 4.570839 |

DFT wb97xd/6-31++G(d,p) optimised ground state structure:

| Center<br>Number | Atomic<br>Number | Atomic<br>Type | Coordinates (Angstroms) |          |          |
|------------------|------------------|----------------|-------------------------|----------|----------|
|                  |                  |                | X                       | Y        | Z        |
| 1                | 5                | 0              | 6.151256                | 4.261577 | 1.926660 |
| 2                | 9                | 0              | 5.317912                | 4.451286 | 0.828206 |
| 3                | 9                | 0              | 5.464013                | 3.643646 | 2.968381 |
| 4                | 7                | 0              | 6.718847                | 5.632578 | 2.408507 |
| 5                | 7                | 0              | 7.393161                | 3.416033 | 1.525474 |
| 6                | 6                | 0              | 5.996003                | 6.679990 | 2.800609 |
| 7                | 6                | 0              | 6.832267                | 7.746347 | 3.203294 |
| 8                | 6                | 0              | 8.129247                | 7.288760 | 3.038253 |
| 9                | 6                | 0              | 8.062025                | 5.963021 | 2.537933 |
| 10               | 6                | 0              | 9.063214                | 5.060588 | 2.179594 |
| 11               | 6                | 0              | 8.718973                | 3.796496 | 1.676085 |
| 12               | 6                | 0              | 9.530045                | 2.733450 | 1.221538 |
| 13               | 1                | 0              | 10.610845               | 2.722705 | 1.205010 |
| 14               | 6                | 0              | 8.679012                | 1.720924 | 0.798429 |
| 15               | 1                | 0              | 8.953072                | 0.760301 | 0.387833 |
| 16               | 6                | 0              | 7.369825                | 2.184408 | 1.006073 |
| 17               | 1                | 0              | 6.428129                | 1.691618 | 0.807866 |
| 18               | 1                | 0              | 4.914709                | 6.636219 | 2.783871 |
| 19               | 6                | 0              | 10.508899               | 5.448010 | 2.286250 |
| 20               | 1                | 0              | 10.871563               | 5.788579 | 1.310728 |
| 21               | 1                | 0              | 10.658639               | 6.253964 | 3.004927 |
| 22               | 1                | 0              | 11.120675               | 4.597510 | 2.592418 |
| 23               | 1                | 0              | 9.033222                | 7.844450 | 3.248543 |
| 24               | 6                | 0              | 6.377010                | 9.085443 | 3.697822 |
| 25               | 1                | 0              | 7.227663                | 9.685303 | 4.030490 |
| 26               | 1                | 0              | 5.858055                | 9.646065 | 2.913600 |
| 27               | 1                | 0              | 5.688120                | 8.984355 | 4.542144 |

DFT B3LYP/6-31G(d) optimised 1<sup>st</sup> excited-state structure:

| Center<br>Number | Atomic<br>Number | Atomic<br>Type | Coordinates (Angstroms) |          |           |
|------------------|------------------|----------------|-------------------------|----------|-----------|
|                  |                  |                | X                       | Y        | Z         |
| 1                | 5                | 0              | 6.224231                | 4.113026 | 2.325502  |
| 2                | 9                | 0              | 5.073392                | 4.129935 | 1.560735  |
| 3                | 9                | 0              | 6.008744                | 3.540644 | 3.569970  |
| 4                | 7                | 0              | 6.722912                | 5.588258 | 2.554000  |
| 5                | 7                | 0              | 7.389553                | 3.443914 | 1.572169  |
| 6                | 6                | 0              | 5.922676                | 6.675043 | 2.799279  |
| 7                | 6                | 0              | 6.718193                | 7.760169 | 3.067939  |
| 8                | 6                | 0              | 8.133156                | 7.263326 | 2.939910  |
| 9                | 6                | 0              | 8.074780                | 5.944529 | 2.626191  |
| 10               | 6                | 0              | 9.140417                | 4.982080 | 2.279471  |
| 11               | 6                | 0              | 8.754516                | 3.794342 | 1.691339  |
| 12               | 6                | 0              | 9.508648                | 2.763889 | 1.038950  |
| 13               | 1                | 0              | 10.583896               | 2.747796 | 0.929750  |
| 14               | 6                | 0              | 8.599727                | 1.846752 | 0.525907  |
| 15               | 1                | 0              | 8.824389                | 0.953376 | -0.041670 |
| 16               | 6                | 0              | 7.309624                | 2.291549 | 0.871083  |
| 17               | 1                | 0              | 6.348730                | 1.837770 | 0.672819  |
| 18               | 1                | 0              | 4.847891                | 6.577305 | 2.784977  |
| 19               | 6                | 0              | 10.566005               | 5.388744 | 2.475425  |
| 20               | 1                | 0              | 10.844690               | 6.244498 | 1.840376  |
| 21               | 1                | 0              | 10.755529               | 5.694324 | 3.514406  |
| 22               | 1                | 0              | 11.251062               | 4.569828 | 2.243634  |
| 23               | 1                | 0              | 9.018987                | 7.872086 | 3.065036  |
| 24               | 6                | 0              | 6.329268                | 9.142292 | 3.431176  |

|    |   |   |          |          |          |
|----|---|---|----------|----------|----------|
| 25 | 1 | 0 | 6.732694 | 9.420555 | 4.416983 |
| 26 | 1 | 0 | 6.749024 | 9.870533 | 2.720122 |
| 27 | 1 | 0 | 5.243668 | 9.267061 | 3.455061 |

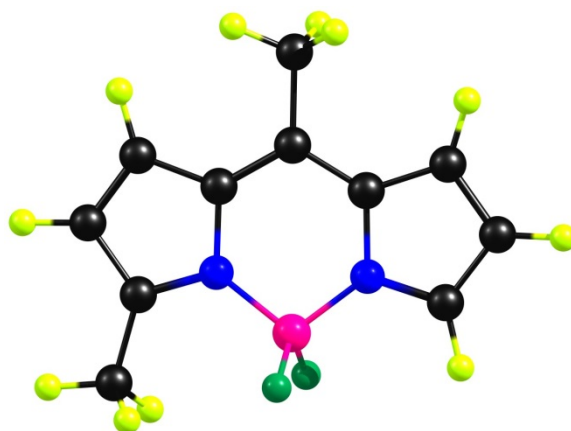

Figure S2-8: DFT B3LYP/6-31G(d) optimised ground-state structure of **2.03**

**DFT B3LYP/6-31G(d) optimised ground state structure:**

| Center Number | Atomic Number | Atomic Type | Coordinates (Angstroms) |          |          |
|---------------|---------------|-------------|-------------------------|----------|----------|
|               |               |             | X                       | Y        | Z        |
| 1             | 5             | 0           | 6.130407                | 4.256069 | 1.914153 |
| 2             | 9             | 0           | 5.338545                | 4.464639 | 0.794899 |
| 3             | 9             | 0           | 5.418296                | 3.620938 | 2.920421 |
| 4             | 7             | 0           | 6.691987                | 5.624756 | 2.437142 |
| 5             | 7             | 0           | 7.387194                | 3.410142 | 1.529832 |
| 6             | 6             | 0           | 5.954837                | 6.665508 | 2.866977 |
| 7             | 6             | 0           | 6.818206                | 7.719419 | 3.261091 |
| 8             | 6             | 0           | 8.117062                | 7.287485 | 3.059415 |
| 9             | 6             | 0           | 8.043884                | 5.966517 | 2.538267 |
| 10            | 6             | 0           | 9.052251                | 5.077953 | 2.154906 |
| 11            | 6             | 0           | 8.715928                | 3.807296 | 1.655015 |
| 12            | 6             | 0           | 9.533205                | 2.742509 | 1.199221 |
| 13            | 1             | 0           | 10.614368               | 2.743695 | 1.168635 |
| 14            | 6             | 0           | 8.685486                | 1.713967 | 0.801290 |
| 15            | 1             | 0           | 8.963914                | 0.749266 | 0.399941 |
| 16            | 6             | 0           | 7.371357                | 2.166998 | 1.022773 |
| 17            | 1             | 0           | 6.432798                | 1.659942 | 0.843282 |
| 18            | 6             | 0           | 10.500709               | 5.484258 | 2.233429 |
| 19            | 1             | 0           | 10.863248               | 5.795920 | 1.245772 |
| 20            | 1             | 0           | 10.652987               | 6.315316 | 2.924220 |
| 21            | 1             | 0           | 11.124841               | 4.649151 | 2.563429 |
| 22            | 1             | 0           | 9.024127                | 7.842882 | 3.254431 |
| 23            | 1             | 0           | 6.493585                | 8.676439 | 3.647246 |
| 24            | 6             | 0           | 4.462077                | 6.631880 | 2.893738 |
| 25            | 1             | 0           | 4.065914                | 6.454818 | 1.888091 |
| 26            | 1             | 0           | 4.110125                | 5.804767 | 3.519608 |
| 27            | 1             | 0           | 4.061555                | 7.572594 | 3.279462 |

**DFT B3LYP/6-31++G(d,p) optimised ground state structure:**

| Center Number | Atomic Number | Atomic Type | Coordinates (Angstroms) |          |          |
|---------------|---------------|-------------|-------------------------|----------|----------|
|               |               |             | X                       | Y        | Z        |
| 1             | 5             | 0           | 6.142041                | 4.257887 | 1.900829 |
| 2             | 9             | 0           | 5.343822                | 4.470128 | 0.772746 |

|    |   |   |           |          |          |
|----|---|---|-----------|----------|----------|
| 3  | 9 | 0 | 5.407282  | 3.611540 | 2.899256 |
| 4  | 7 | 0 | 6.689612  | 5.622671 | 2.435334 |
| 5  | 7 | 0 | 7.390964  | 3.410689 | 1.521385 |
| 6  | 6 | 0 | 5.951509  | 6.658391 | 2.873638 |
| 7  | 6 | 0 | 6.815301  | 7.709684 | 3.269970 |
| 8  | 6 | 0 | 8.112660  | 7.282399 | 3.060206 |
| 9  | 6 | 0 | 8.042136  | 5.965405 | 2.532350 |
| 10 | 6 | 0 | 9.051212  | 5.083441 | 2.144356 |
| 11 | 6 | 0 | 8.716573  | 3.813016 | 1.644981 |
| 12 | 6 | 0 | 9.535115  | 2.751401 | 1.192168 |
| 13 | 1 | 0 | 10.613731 | 2.754033 | 1.162356 |
| 14 | 6 | 0 | 8.690199  | 1.719096 | 0.798303 |
| 15 | 1 | 0 | 8.971110  | 0.756406 | 0.401088 |
| 16 | 6 | 0 | 7.376188  | 2.166033 | 1.018047 |
| 17 | 1 | 0 | 6.442201  | 1.654931 | 0.839834 |
| 18 | 6 | 0 | 10.498869 | 5.482417 | 2.232509 |
| 19 | 1 | 0 | 10.910825 | 5.632151 | 1.229850 |
| 20 | 1 | 0 | 10.634955 | 6.404291 | 2.794069 |
| 21 | 1 | 0 | 11.087249 | 4.699094 | 2.714908 |
| 22 | 1 | 0 | 9.015563  | 7.838410 | 3.256927 |
| 23 | 1 | 0 | 6.492455  | 8.661607 | 3.662761 |
| 24 | 6 | 0 | 4.461373  | 6.635958 | 2.910337 |
| 25 | 1 | 0 | 4.054145  | 6.469844 | 1.909666 |
| 26 | 1 | 0 | 4.103998  | 5.815470 | 3.537884 |
| 27 | 1 | 0 | 4.077803  | 7.578728 | 3.300927 |

DFT mpw1pw91/6-31++G(d,p) optimised ground state structure:

| Center Number | Atomic Number | Atomic Type | Coordinates (Angstroms) |          |          |
|---------------|---------------|-------------|-------------------------|----------|----------|
|               |               |             | X                       | Y        | Z        |
| 1             | 5             | 0           | 6.146747                | 4.263635 | 1.902370 |
| 2             | 9             | 0           | 5.354219                | 4.476749 | 0.779014 |
| 3             | 9             | 0           | 5.416619                | 3.620876 | 2.896904 |
| 4             | 7             | 0           | 6.695348                | 5.621623 | 2.434766 |
| 5             | 7             | 0           | 7.391472                | 3.419452 | 1.524473 |
| 6             | 6             | 0           | 5.959484                | 6.651299 | 2.871322 |
| 7             | 6             | 0           | 6.818631                | 7.701029 | 3.267691 |
| 8             | 6             | 0           | 8.112308                | 7.275098 | 3.058088 |
| 9             | 6             | 0           | 8.039147                | 5.962930 | 2.531401 |
| 10            | 6             | 0           | 9.045745                | 5.084215 | 2.144515 |
| 11            | 6             | 0           | 8.709683                | 3.817886 | 1.646429 |
| 12            | 6             | 0           | 9.526824                | 2.761399 | 1.195101 |
| 13            | 1             | 0           | 10.605298               | 2.765471 | 1.165115 |
| 14            | 6             | 0           | 8.683670                | 1.732473 | 0.802453 |
| 15            | 1             | 0           | 8.962817                | 0.769866 | 0.404826 |
| 16            | 6             | 0           | 7.374572                | 2.180622 | 1.023140 |
| 17            | 1             | 0           | 6.439282                | 1.671971 | 0.846041 |
| 18            | 6             | 0           | 10.485456               | 5.479661 | 2.232551 |
| 19            | 1             | 0           | 10.898591               | 5.617746 | 1.229809 |
| 20            | 1             | 0           | 10.621036               | 6.406301 | 2.784907 |
| 21            | 1             | 0           | 11.069740               | 4.699713 | 2.723471 |
| 22            | 1             | 0           | 9.015788                | 7.830089 | 3.254408 |
| 23            | 1             | 0           | 6.494533                | 8.651977 | 3.660775 |
| 24            | 6             | 0           | 4.476415                | 6.623612 | 2.905714 |
| 25            | 1             | 0           | 4.073801                | 6.455144 | 1.904614 |
| 26            | 1             | 0           | 4.123617                | 5.800878 | 3.531236 |
| 27            | 1             | 0           | 4.088048                | 7.563405 | 3.295554 |

DFT wb97xd/6-31++G(d,p) optimised ground state structure:

| Center Number | Atomic Number | Atomic Type | Coordinates (Angstroms) |          |          |
|---------------|---------------|-------------|-------------------------|----------|----------|
|               |               |             | X                       | Y        | Z        |
| 1             | 5             | 0           | 6.147008                | 4.246068 | 1.941127 |
| 2             | 9             | 0           | 5.310977                | 4.435839 | 0.840885 |
| 3             | 9             | 0           | 5.459773                | 3.602561 | 2.971937 |

|    |   |   |           |          |          |
|----|---|---|-----------|----------|----------|
| 4  | 7 | 0 | 6.693452  | 5.620257 | 2.442426 |
| 5  | 7 | 0 | 7.391073  | 3.415365 | 1.531161 |
| 6  | 6 | 0 | 5.957638  | 6.654365 | 2.866418 |
| 7  | 6 | 0 | 6.815474  | 7.711584 | 3.255884 |
| 8  | 6 | 0 | 8.111524  | 7.284731 | 3.054056 |
| 9  | 6 | 0 | 8.041854  | 5.964574 | 2.539408 |
| 10 | 6 | 0 | 9.047461  | 5.083763 | 2.154734 |
| 11 | 6 | 0 | 8.712208  | 3.814184 | 1.652589 |
| 12 | 6 | 0 | 9.529808  | 2.764023 | 1.187443 |
| 13 | 1 | 0 | 10.610443 | 2.771438 | 1.151810 |
| 14 | 6 | 0 | 8.684705  | 1.735014 | 0.786335 |
| 15 | 1 | 0 | 8.964729  | 0.776078 | 0.375691 |
| 16 | 6 | 0 | 7.374448  | 2.179338 | 1.017087 |
| 17 | 1 | 0 | 6.436153  | 1.672741 | 0.839331 |
| 18 | 6 | 0 | 10.494057 | 5.474205 | 2.240459 |
| 19 | 1 | 0 | 10.905962 | 5.590445 | 1.233179 |
| 20 | 1 | 0 | 10.638056 | 6.409886 | 2.779252 |
| 21 | 1 | 0 | 11.069469 | 4.694511 | 2.745988 |
| 22 | 1 | 0 | 9.015224  | 7.844922 | 3.247174 |
| 23 | 1 | 0 | 6.487418  | 8.667611 | 3.638494 |
| 24 | 6 | 0 | 4.467747  | 6.631349 | 2.883364 |
| 25 | 1 | 0 | 4.079531  | 6.611206 | 1.860753 |
| 26 | 1 | 0 | 4.100652  | 5.733450 | 3.386356 |
| 27 | 1 | 0 | 4.082049  | 7.515614 | 3.393342 |

DFT B3LYP/6-31G(d) optimised 1<sup>st</sup> excited-state structure:

| Center<br>Number | Atomic<br>Number | Atomic<br>Type | Coordinates (Angstroms) |          |          |
|------------------|------------------|----------------|-------------------------|----------|----------|
|                  |                  |                | X                       | Y        | Z        |
| 1                | 5                | 0              | 6.163545                | 4.219957 | 2.080451 |
| 2                | 9                | 0              | 5.215783                | 4.274153 | 1.067795 |
| 3                | 9                | 0              | 5.665238                | 3.553514 | 3.192570 |
| 4                | 7                | 0              | 6.713740                | 5.611100 | 2.434896 |
| 5                | 7                | 0              | 7.399576                | 3.408701 | 1.538232 |
| 6                | 6                | 0              | 5.947299                | 6.671415 | 2.811106 |
| 7                | 6                | 0              | 6.791211                | 7.741967 | 3.179191 |
| 8                | 6                | 0              | 8.106321                | 7.327242 | 3.033387 |
| 9                | 6                | 0              | 8.076728                | 5.975359 | 2.557986 |
| 10               | 6                | 0              | 9.102520                | 5.114803 | 2.226171 |
| 11               | 6                | 0              | 8.744900                | 3.806029 | 1.653718 |
| 12               | 6                | 0              | 9.508944                | 2.822722 | 1.120274 |
| 13               | 1                | 0              | 10.586549               | 2.799818 | 1.038120 |
| 14               | 6                | 0              | 8.577322                | 1.751321 | 0.641069 |
| 15               | 1                | 0              | 8.868318                | 0.820895 | 0.173134 |
| 16               | 6                | 0              | 7.310495                | 2.184177 | 0.921105 |
| 17               | 1                | 0              | 6.348033                | 1.729394 | 0.746862 |
| 18               | 6                | 0              | 10.552985               | 5.455469 | 2.359999 |
| 19               | 1                | 0              | 11.060120               | 5.486356 | 1.383039 |
| 20               | 1                | 0              | 10.695712               | 6.428645 | 2.834729 |
| 21               | 1                | 0              | 11.087822               | 4.710485 | 2.967479 |
| 22               | 1                | 0              | 8.999113                | 7.907507 | 3.217669 |
| 23               | 1                | 0              | 6.444457                | 8.710623 | 3.515857 |
| 24               | 6                | 0              | 4.457067                | 6.616158 | 2.827308 |
| 25               | 1                | 0              | 4.055905                | 6.413296 | 1.827513 |
| 26               | 1                | 0              | 4.104221                | 5.803316 | 3.474822 |
| 27               | 1                | 0              | 4.044967                | 7.560701 | 3.192202 |

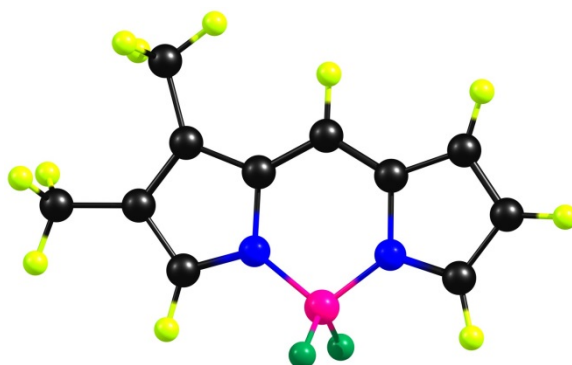

Figure S2-9: DFT B3LYP/6-31G(d) optimised ground-state structure of **2.04**

**DFT B3LYP/6-31G(d) optimised ground state structure:**

| Center Number | Atomic Number | Atomic Type | Coordinates (Angstroms) |          |          |
|---------------|---------------|-------------|-------------------------|----------|----------|
|               |               |             | X                       | Y        | Z        |
| 1             | 5             | 0           | 6.121964                | 4.266940 | 1.863989 |
| 2             | 9             | 0           | 5.419141                | 4.480719 | 0.692593 |
| 3             | 9             | 0           | 5.331753                | 3.678168 | 2.832042 |
| 4             | 7             | 0           | 6.698510                | 5.629952 | 2.396155 |
| 5             | 7             | 0           | 7.381328                | 3.370306 | 1.574818 |
| 6             | 6             | 0           | 5.990269                | 6.676427 | 2.836136 |
| 7             | 6             | 0           | 6.833914                | 7.757179 | 3.180326 |
| 8             | 6             | 0           | 8.140134                | 7.330775 | 2.928441 |
| 9             | 6             | 0           | 8.045030                | 5.992991 | 2.438018 |
| 10            | 6             | 0           | 9.022470                | 5.083187 | 2.057427 |
| 11            | 6             | 0           | 8.708224                | 3.790531 | 1.638414 |
| 12            | 6             | 0           | 9.535966                | 2.705907 | 1.251409 |
| 13            | 1             | 0           | 10.617127               | 2.729070 | 1.206696 |
| 14            | 6             | 0           | 8.696507                | 1.637999 | 0.959372 |
| 15            | 1             | 0           | 8.979043                | 0.645925 | 0.635103 |
| 16            | 6             | 0           | 7.377126                | 2.091233 | 1.171493 |
| 17            | 1             | 0           | 6.444219                | 1.556817 | 1.050455 |
| 18            | 1             | 0           | 4.909793                | 6.626274 | 2.889726 |
| 19            | 1             | 0           | 10.067137               | 5.376500 | 2.097520 |
| 20            | 6             | 0           | 9.397421                | 8.114939 | 3.145181 |
| 21            | 1             | 0           | 10.277609               | 7.604677 | 2.742477 |
| 22            | 1             | 0           | 9.337326                | 9.099270 | 2.664433 |
| 23            | 1             | 0           | 9.579243                | 8.293637 | 4.213319 |
| 24            | 6             | 0           | 6.392290                | 9.087339 | 3.716099 |
| 25            | 1             | 0           | 6.749394                | 9.254104 | 4.740834 |
| 26            | 1             | 0           | 6.771830                | 9.916764 | 3.105715 |
| 27            | 1             | 0           | 5.300524                | 9.163207 | 3.732490 |

**DFT B3LYP/6-31++G(d,p) optimised ground state structure:**

| Center Number | Atomic Number | Atomic Type | Coordinates (Angstroms) |          |          |
|---------------|---------------|-------------|-------------------------|----------|----------|
|               |               |             | X                       | Y        | Z        |
| 1             | 5             | 0           | 6.134990                | 4.246313 | 1.933186 |
| 2             | 9             | 0           | 5.324163                | 4.420981 | 0.812150 |
| 3             | 9             | 0           | 5.419084                | 3.644758 | 2.967729 |
| 4             | 7             | 0           | 6.701400                | 5.627869 | 2.405741 |
| 5             | 7             | 0           | 7.382828                | 3.374501 | 1.564297 |
| 6             | 6             | 0           | 5.990503                | 6.683557 | 2.817203 |
| 7             | 6             | 0           | 6.835359                | 7.759365 | 3.167392 |
| 8             | 6             | 0           | 8.142308                | 7.320559 | 2.951818 |
| 9             | 6             | 0           | 8.049351                | 5.979088 | 2.472850 |
| 10            | 6             | 0           | 9.025791                | 5.068654 | 2.101999 |
| 11            | 6             | 0           | 8.708686                | 3.787567 | 1.654648 |
| 12            | 6             | 0           | 9.533546                | 2.716467 | 1.232618 |

|    |   |   |           |          |          |
|----|---|---|-----------|----------|----------|
| 13 | 1 | 0 | 10.612300 | 2.737277 | 1.192602 |
| 14 | 6 | 0 | 8.692291  | 1.665209 | 0.891113 |
| 15 | 1 | 0 | 8.973176  | 0.689425 | 0.527364 |
| 16 | 6 | 0 | 7.374591  | 2.112405 | 1.110181 |
| 17 | 1 | 0 | 6.443821  | 1.585756 | 0.961529 |
| 18 | 1 | 0 | 4.910871  | 6.642634 | 2.850014 |
| 19 | 1 | 0 | 10.069489 | 5.353725 | 2.158687 |
| 20 | 6 | 0 | 9.396014  | 8.104026 | 3.178731 |
| 21 | 1 | 0 | 10.290981 | 7.530172 | 2.932657 |
| 22 | 1 | 0 | 9.407897  | 9.014044 | 2.569813 |
| 23 | 1 | 0 | 9.480774  | 8.418256 | 4.224261 |
| 24 | 6 | 0 | 6.394314  | 9.101107 | 3.669978 |
| 25 | 1 | 0 | 6.798818  | 9.312065 | 4.665387 |
| 26 | 1 | 0 | 6.725873  | 9.908572 | 3.008891 |
| 27 | 1 | 0 | 5.306075  | 9.156483 | 3.737840 |

DFT mpw1pw91/6-31++G(d,p) optimised ground state structure:

| Center Number | Atomic Number | Atomic Type | Coordinates (Angstroms) |           |           |
|---------------|---------------|-------------|-------------------------|-----------|-----------|
|               |               |             | X                       | Y         | Z         |
| 1             | 5             | 0           | 0.844672                | -1.335643 | -0.000002 |
| 2             | 9             | 0           | 0.994935                | -2.110386 | -1.142007 |
| 3             | 9             | 0           | 0.994936                | -2.110394 | 1.141998  |
| 4             | 7             | 0           | -0.556798               | -0.651740 | 0.000001  |
| 5             | 7             | 0           | 1.885379                | -0.174222 | 0.000002  |
| 6             | 6             | 0           | -1.738515               | -1.265233 | 0.000002  |
| 7             | 6             | 0           | -2.793859               | -0.333277 | 0.000001  |
| 8             | 6             | 0           | -2.202743               | 0.925964  | -0.000001 |
| 9             | 6             | 0           | -0.796387               | 0.714039  | -0.000001 |
| 10            | 6             | 0           | 0.259431                | 1.605063  | -0.000002 |
| 11            | 6             | 0           | 1.581269                | 1.175773  | 0.000000  |
| 12            | 6             | 0           | 2.792017                | 1.900915  | 0.000001  |
| 13            | 1             | 0           | 2.875750                | 2.977019  | 0.000000  |
| 14            | 6             | 0           | 3.819174                | 0.971899  | 0.000003  |
| 15            | 1             | 0           | 4.880219                | 1.163555  | 0.000004  |
| 16            | 6             | 0           | 3.214948                | -0.295800 | 0.000004  |
| 17            | 1             | 0           | 3.678377                | -1.270777 | 0.000006  |
| 18            | 1             | 0           | -1.798564               | -2.344265 | 0.000003  |
| 19            | 1             | 0           | 0.059411                | 2.669501  | -0.000003 |
| 20            | 6             | 0           | -2.905420               | 2.238318  | -0.000001 |
| 21            | 1             | 0           | -2.209831               | 3.077873  | -0.000017 |
| 22            | 1             | 0           | -3.548011               | 2.339097  | -0.879425 |
| 23            | 1             | 0           | -3.547987               | 2.339111  | 0.879439  |
| 24            | 6             | 0           | -4.251567               | -0.652593 | 0.000003  |
| 25            | 1             | 0           | -4.753057               | -0.240798 | 0.880522  |
| 26            | 1             | 0           | -4.753060               | -0.240789 | -0.880511 |
| 27            | 1             | 0           | -4.416963               | -1.730626 | -0.000002 |

DFT wb97xd/6-31++G(d,p) optimised ground state structure:

| Center Number | Atomic Number | Atomic Type | Coordinates (Angstroms) |           |           |
|---------------|---------------|-------------|-------------------------|-----------|-----------|
|               |               |             | X                       | Y         | Z         |
| 1             | 5             | 0           | 0.849485                | -1.338690 | -0.000003 |
| 2             | 9             | 0           | 0.999200                | -2.114911 | -1.145862 |
| 3             | 9             | 0           | 0.999199                | -2.114919 | 1.145851  |
| 4             | 7             | 0           | -0.554062               | -0.654033 | -0.000001 |
| 5             | 7             | 0           | 1.889929                | -0.175221 | 0.000001  |
| 6             | 6             | 0           | -1.735978               | -1.268488 | 0.000001  |
| 7             | 6             | 0           | -2.792881               | -0.334858 | 0.000000  |
| 8             | 6             | 0           | -2.203256               | 0.924790  | -0.000003 |
| 9             | 6             | 0           | -0.795034               | 0.716116  | -0.000002 |
| 10            | 6             | 0           | 0.261340                | 1.608519  | -0.000002 |
| 11            | 6             | 0           | 1.587140                | 1.178706  | 0.000000  |
| 12            | 6             | 0           | 2.799324                | 1.902987  | 0.000004  |
| 13            | 1             | 0           | 2.885689                | 2.981029  | 0.000004  |



|    |   |   |           |           |           |
|----|---|---|-----------|-----------|-----------|
| 14 | 6 | 0 | 3.827683  | 0.970590  | 0.000002  |
| 15 | 1 | 0 | 4.890617  | 1.162005  | 0.000002  |
| 16 | 6 | 0 | 3.221000  | -0.298114 | 0.000007  |
| 17 | 1 | 0 | 3.682706  | -1.275712 | 0.000009  |
| 18 | 1 | 0 | -1.795358 | -2.349438 | 0.000003  |
| 19 | 1 | 0 | 0.061024  | 2.675316  | -0.000004 |
| 20 | 6 | 0 | -2.919054 | 2.236048  | -0.000002 |
| 21 | 1 | 0 | -2.230137 | 3.083834  | -0.000030 |
| 22 | 1 | 0 | -3.562482 | 2.326340  | -0.881741 |
| 23 | 1 | 0 | -3.562437 | 2.326363  | 0.881769  |
| 24 | 6 | 0 | -4.257831 | -0.645851 | 0.000003  |
| 25 | 1 | 0 | -4.753505 | -0.228029 | 0.883007  |
| 26 | 1 | 0 | -4.753509 | -0.228022 | -0.882997 |
| 27 | 1 | 0 | -4.431054 | -1.724775 | -0.000002 |

DFT B3LYP/6-31G(d) optimised 1<sup>st</sup> excited-state structure:

| Center Number | Atomic Number | Atomic Type | Coordinates (Angstroms) |          |          |
|---------------|---------------|-------------|-------------------------|----------|----------|
|               |               |             | X                       | Y        | Z        |
| 1             | 5             | 0           | 6.200907                | 4.161908 | 2.178024 |
| 2             | 9             | 0           | 5.141171                | 4.255853 | 1.296254 |
| 3             | 9             | 0           | 5.813765                | 3.609456 | 3.389162 |
| 4             | 7             | 0           | 6.741387                | 5.619855 | 2.483646 |
| 5             | 7             | 0           | 7.396773                | 3.420701 | 1.553527 |
| 6             | 6             | 0           | 5.944509                | 6.708447 | 2.742608 |
| 7             | 6             | 0           | 6.743477                | 7.765410 | 3.086457 |
| 8             | 6             | 0           | 8.170590                | 7.254204 | 3.000280 |
| 9             | 6             | 0           | 8.091394                | 5.946324 | 2.627563 |
| 10            | 6             | 0           | 9.118124                | 4.954823 | 2.307385 |
| 11            | 6             | 0           | 8.752389                | 3.756453 | 1.736661 |
| 12            | 6             | 0           | 9.531966                | 2.693918 | 1.178361 |
| 13            | 1             | 0           | 10.612909               | 2.668001 | 1.149925 |
| 14            | 6             | 0           | 8.643281                | 1.758779 | 0.658236 |
| 15            | 1             | 0           | 8.888264                | 0.836086 | 0.149164 |
| 16            | 6             | 0           | 7.342624                | 2.232696 | 0.905056 |
| 17            | 1             | 0           | 6.389584                | 1.782298 | 0.665274 |
| 18            | 1             | 0           | 4.870342                | 6.627981 | 2.676560 |
| 19            | 1             | 0           | 10.161657               | 5.202499 | 2.448445 |
| 20            | 6             | 0           | 9.376982                | 8.080617 | 3.268733 |
| 21            | 1             | 0           | 10.298758               | 7.509931 | 3.134293 |
| 22            | 1             | 0           | 9.416466                | 8.953241 | 2.601287 |
| 23            | 1             | 0           | 9.368099                | 8.476317 | 4.294239 |
| 24            | 6             | 0           | 6.348435                | 9.140432 | 3.476830 |
| 25            | 1             | 0           | 6.706146                | 9.387942 | 4.487436 |
| 26            | 1             | 0           | 6.792610                | 9.891151 | 2.806242 |
| 27            | 1             | 0           | 5.262687                | 9.265514 | 3.459033 |

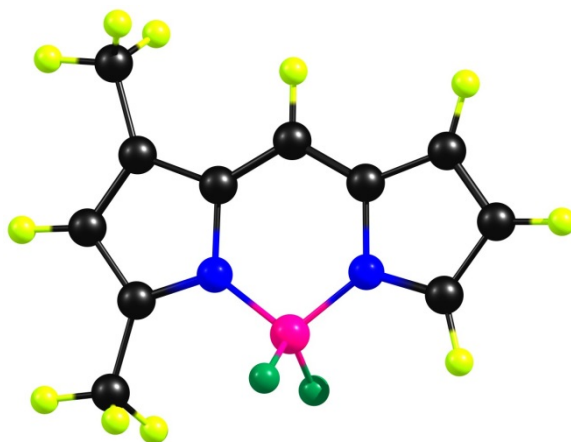

Figure S2-10: DFT B3LYP/6-31G(d) optimised ground-state structure of **2.05**

### DFT B3LYP/6-31G(d) optimised ground state structure:

| Center<br>Number | Atomic<br>Number | Atomic<br>Type | Coordinates (Angstroms) |          |          |
|------------------|------------------|----------------|-------------------------|----------|----------|
|                  |                  |                | X                       | Y        | Z        |
| 1                | 5                | 0              | 6.121968                | 4.244795 | 1.912054 |
| 2                | 9                | 0              | 5.318221                | 4.439381 | 0.799454 |
| 3                | 9                | 0              | 5.423300                | 3.618253 | 2.932376 |
| 4                | 7                | 0              | 6.679696                | 5.627517 | 2.416896 |
| 5                | 7                | 0              | 7.380115                | 3.394807 | 1.522841 |
| 6                | 6                | 0              | 5.954077                | 6.670529 | 2.854169 |
| 7                | 6                | 0              | 6.826554                | 7.729552 | 3.218887 |
| 8                | 6                | 0              | 8.129135                | 7.313298 | 2.994478 |
| 9                | 6                | 0              | 8.031817                | 5.979553 | 2.485818 |
| 10               | 6                | 0              | 9.013640                | 5.086142 | 2.093505 |
| 11               | 6                | 0              | 8.705552                | 3.808848 | 1.616946 |
| 12               | 6                | 0              | 9.533858                | 2.751444 | 1.169043 |
| 13               | 1                | 0              | 10.615005               | 2.778433 | 1.126173 |
| 14               | 6                | 0              | 8.694450                | 1.702400 | 0.806521 |
| 15               | 1                | 0              | 8.979139                | 0.733663 | 0.419536 |
| 16               | 6                | 0              | 7.376385                | 2.140583 | 1.040154 |
| 17               | 1                | 0              | 6.443599                | 1.615458 | 0.883940 |
| 18               | 1                | 0              | 10.056334               | 5.383281 | 2.156534 |
| 19               | 1                | 0              | 6.508185                | 8.689857 | 3.604258 |
| 20               | 6                | 0              | 9.393413                | 8.082878 | 3.228471 |
| 21               | 1                | 0              | 10.048830               | 7.577286 | 3.948697 |
| 22               | 1                | 0              | 9.967723                | 8.211099 | 2.302379 |
| 23               | 1                | 0              | 9.173061                | 9.078988 | 3.622817 |
| 24               | 6                | 0              | 4.462927                | 6.637634 | 2.914959 |
| 25               | 1                | 0              | 4.045527                | 6.447454 | 1.920190 |
| 26               | 1                | 0              | 4.126194                | 5.817035 | 3.557755 |
| 27               | 1                | 0              | 4.069077                | 7.582166 | 3.297980 |

### DFT B3LYP/6-31++G(d,p) optimised ground state structure:

| Center<br>Number | Atomic<br>Number | Atomic<br>Type | Coordinates (Angstroms) |          |          |
|------------------|------------------|----------------|-------------------------|----------|----------|
|                  |                  |                | X                       | Y        | Z        |
| 1                | 5                | 0              | 6.134154                | 4.241660 | 1.910840 |
| 2                | 9                | 0              | 5.315836                | 4.429312 | 0.793398 |
| 3                | 9                | 0              | 5.421574                | 3.606747 | 2.931942 |
| 4                | 7                | 0              | 6.677057                | 5.624515 | 2.415895 |
| 5                | 7                | 0              | 7.384835                | 3.392059 | 1.522213 |
| 6                | 6                | 0              | 5.951874                | 6.666882 | 2.852682 |
| 7                | 6                | 0              | 6.825780                | 7.724445 | 3.216244 |
| 8                | 6                | 0              | 8.126533                | 7.307918 | 2.991715 |
| 9                | 6                | 0              | 8.030636                | 5.975221 | 2.483857 |
| 10               | 6                | 0              | 9.012822                | 5.086358 | 2.093401 |
| 11               | 6                | 0              | 8.707070                | 3.809525 | 1.617404 |
| 12               | 6                | 0              | 9.536229                | 2.754990 | 1.170790 |
| 13               | 1                | 0              | 10.614713               | 2.782963 | 1.128221 |
| 14               | 6                | 0              | 8.698911                | 1.704490 | 0.808134 |
| 15               | 1                | 0              | 8.985546                | 0.738796 | 0.422519 |
| 16               | 6                | 0              | 7.381420                | 2.137426 | 1.039806 |
| 17               | 1                | 0              | 6.452850                | 1.609743 | 0.882757 |
| 18               | 1                | 0              | 10.052944               | 5.384128 | 2.156502 |
| 19               | 1                | 0              | 6.508016                | 8.682516 | 3.600462 |
| 20               | 6                | 0              | 9.388292                | 8.078215 | 3.225608 |
| 21               | 1                | 0              | 10.040320               | 7.573083 | 3.945007 |
| 22               | 1                | 0              | 9.959006                | 8.205625 | 2.300468 |
| 23               | 1                | 0              | 9.165784                | 9.071388 | 3.618617 |
| 24               | 6                | 0              | 4.463370                | 6.649425 | 2.919568 |
| 25               | 1                | 0              | 4.036543                | 6.468002 | 1.929590 |
| 26               | 1                | 0              | 4.117462                | 5.838540 | 3.566070 |
| 27               | 1                | 0              | 4.088208                | 7.598358 | 3.303120 |

### DFT mpw1pw91/6-31++G(d,p) optimised ground state structure:

| Center<br>Number | Atomic<br>Number | Atomic<br>Type | Coordinates (Angstroms) |          |          |
|------------------|------------------|----------------|-------------------------|----------|----------|
|                  |                  |                | X                       | Y        | Z        |
| 1                | 5                | 0              | 6.138547                | 4.248692 | 1.913112 |
| 2                | 9                | 0              | 5.325642                | 4.436633 | 0.800252 |
| 3                | 9                | 0              | 5.430785                | 3.617089 | 2.930361 |
| 4                | 7                | 0              | 6.681780                | 5.624606 | 2.415688 |
| 5                | 7                | 0              | 7.385143                | 3.402888 | 1.526162 |
| 6                | 6                | 0              | 5.958401                | 6.661071 | 2.850160 |
| 7                | 6                | 0              | 6.827114                | 7.717439 | 3.213712 |
| 8                | 6                | 0              | 8.124236                | 7.302214 | 2.989942 |
| 9                | 6                | 0              | 8.026690                | 5.974030 | 2.483750 |
| 10               | 6                | 0              | 9.007590                | 5.089113 | 2.094864 |
| 11               | 6                | 0              | 8.700478                | 3.815938 | 1.620166 |
| 12               | 6                | 0              | 9.527194                | 2.765297 | 1.175051 |
| 13               | 1                | 0              | 10.605337               | 2.792989 | 1.132496 |
| 14               | 6                | 0              | 8.690927                | 1.718913 | 0.813676 |
| 15               | 1                | 0              | 8.975196                | 0.752992 | 0.427946 |
| 16               | 6                | 0              | 7.378743                | 2.154153 | 1.045938 |
| 17               | 1                | 0              | 6.448552                | 1.629441 | 0.889952 |
| 18               | 1                | 0              | 10.047062               | 5.387388 | 2.158324 |
| 19               | 1                | 0              | 6.507902                | 8.674669 | 3.597751 |
| 20               | 6                | 0              | 9.381779                | 8.066203 | 3.221823 |
| 21               | 1                | 0              | 10.031672               | 7.558944 | 3.939987 |
| 22               | 1                | 0              | 9.950572                | 8.191265 | 2.296476 |
| 23               | 1                | 0              | 9.162330                | 9.058946 | 3.614597 |
| 24               | 6                | 0              | 4.476889                | 6.638138 | 2.914466 |
| 25               | 1                | 0              | 4.054853                | 6.454059 | 1.924011 |
| 26               | 1                | 0              | 4.135564                | 5.825075 | 3.559004 |
| 27               | 1                | 0              | 4.096807                | 7.584150 | 3.297163 |

**DFT wb97xd/6-31++G(d,p) optimised ground state structure:**

| Center<br>Number | Atomic<br>Number | Atomic<br>Type | Coordinates (Angstroms) |          |          |
|------------------|------------------|----------------|-------------------------|----------|----------|
|                  |                  |                | X                       | Y        | Z        |
| 1                | 5                | 0              | 6.136129                | 4.246796 | 1.908090 |
| 2                | 9                | 0              | 5.325697                | 4.437565 | 0.788475 |
| 3                | 9                | 0              | 5.421721                | 3.615267 | 2.926600 |
| 4                | 7                | 0              | 6.678525                | 5.625340 | 2.413633 |
| 5                | 7                | 0              | 7.384305                | 3.400543 | 1.526502 |
| 6                | 6                | 0              | 5.957043                | 6.662552 | 2.846361 |
| 7                | 6                | 0              | 6.826043                | 7.721682 | 3.214647 |
| 8                | 6                | 0              | 8.123639                | 7.305211 | 2.994333 |
| 9                | 6                | 0              | 8.028634                | 5.975134 | 2.487158 |
| 10               | 6                | 0              | 9.010379                | 5.088671 | 2.104788 |
| 11               | 6                | 0              | 8.703460                | 3.811255 | 1.626940 |
| 12               | 6                | 0              | 9.530759                | 2.759377 | 1.187516 |
| 13               | 1                | 0              | 10.611301               | 2.785378 | 1.150785 |
| 14               | 6                | 0              | 8.692657                | 1.710946 | 0.821510 |
| 15               | 1                | 0              | 8.979958                | 0.743110 | 0.437699 |
| 16               | 6                | 0              | 7.378751                | 2.149077 | 1.046747 |
| 17               | 1                | 0              | 6.446133                | 1.626105 | 0.887037 |
| 18               | 1                | 0              | 10.051859               | 5.387180 | 2.175243 |
| 19               | 1                | 0              | 6.504593                | 8.680047 | 3.599805 |
| 20               | 6                | 0              | 9.388294                | 8.071088 | 3.215937 |
| 21               | 1                | 0              | 10.106021               | 7.494983 | 3.808184 |
| 22               | 1                | 0              | 9.867996                | 8.322795 | 2.264184 |
| 23               | 1                | 0              | 9.185336                | 9.003922 | 3.746048 |
| 24               | 6                | 0              | 4.469144                | 6.640619 | 2.907878 |
| 25               | 1                | 0              | 4.050099                | 6.451406 | 1.915775 |
| 26               | 1                | 0              | 4.127516                | 5.833258 | 3.561524 |
| 27               | 1                | 0              | 4.091796                | 7.593025 | 3.283429 |

**DFT B3LYP/6-31G(d) optimised 1<sup>st</sup> excited-state structure:**

| Center Number | Atomic Number | Atomic Type | Coordinates (Angstroms) |          |          |
|---------------|---------------|-------------|-------------------------|----------|----------|
|               |               |             | X                       | Y        | Z        |
| 1             | 5             | 0           | 6.149524                | 4.260813 | 1.946153 |
| 2             | 9             | 0           | 5.329080                | 4.390479 | 0.833127 |
| 3             | 9             | 0           | 5.492177                | 3.588646 | 2.968645 |
| 4             | 7             | 0           | 6.710226                | 5.616057 | 2.411950 |
| 5             | 7             | 0           | 7.403168                | 3.398111 | 1.525775 |
| 6             | 6             | 0           | 5.958933                | 6.666791 | 2.839213 |
| 7             | 6             | 0           | 6.816435                | 7.728734 | 3.206219 |
| 8             | 6             | 0           | 8.131933                | 7.332695 | 3.005639 |
| 9             | 6             | 0           | 8.071514                | 5.983897 | 2.497819 |
| 10            | 6             | 0           | 9.081086                | 5.132587 | 2.131890 |
| 11            | 6             | 0           | 8.751711                | 3.802690 | 1.623593 |
| 12            | 6             | 0           | 9.520910                | 2.782563 | 1.177538 |
| 13            | 1             | 0           | 10.600319               | 2.756449 | 1.114524 |
| 14            | 6             | 0           | 8.594566                | 1.675962 | 0.776851 |
| 15            | 1             | 0           | 8.889287                | 0.714602 | 0.378871 |
| 16            | 6             | 0           | 7.323375                | 2.125446 | 1.015849 |
| 17            | 1             | 0           | 6.364504                | 1.652904 | 0.871157 |
| 18            | 1             | 0           | 10.119443               | 5.427153 | 2.203341 |
| 19            | 1             | 0           | 6.481434                | 8.688097 | 3.581507 |
| 20            | 6             | 0           | 9.388197                | 8.105892 | 3.246571 |
| 21            | 1             | 0           | 10.042126               | 7.606694 | 3.975397 |
| 22            | 1             | 0           | 9.975989                | 8.228100 | 2.325918 |
| 23            | 1             | 0           | 9.164338                | 9.105217 | 3.632052 |
| 24            | 6             | 0           | 4.470341                | 6.612315 | 2.883383 |
| 25            | 1             | 0           | 4.056755                | 6.412371 | 1.887144 |
| 26            | 1             | 0           | 4.129740                | 5.792957 | 3.529048 |
| 27            | 1             | 0           | 4.060672                | 7.554111 | 3.257651 |

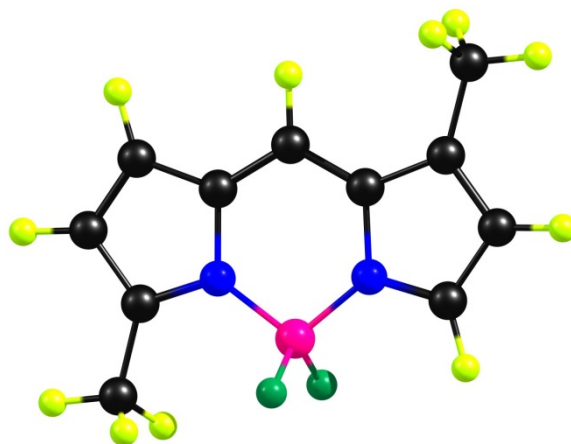

Figure S-11: DFT B3LYP/6-31G(d) optimised ground-state structure of **2.06**

**DFT B3LYP/6-31G(d) optimised ground state structure:**

| Center Number | Atomic Number | Atomic Type | Coordinates (Angstroms) |          |          |
|---------------|---------------|-------------|-------------------------|----------|----------|
|               |               |             | X                       | Y        | Z        |
| 1             | 5             | 0           | 6.117956                | 4.258488 | 1.911848 |
| 2             | 9             | 0           | 5.303249                | 4.480284 | 0.812509 |
| 3             | 9             | 0           | 5.427616                | 3.615651 | 2.927580 |
| 4             | 7             | 0           | 6.688983                | 5.623514 | 2.435881 |
| 5             | 7             | 0           | 7.369317                | 3.405769 | 1.489774 |
| 6             | 6             | 0           | 5.974618                | 6.657709 | 2.900116 |
| 7             | 6             | 0           | 6.829093                | 7.711151 | 3.282221 |
| 8             | 6             | 0           | 8.135816                | 7.297093 | 3.037104 |
| 9             | 6             | 0           | 8.036613                | 5.977205 | 2.503302 |
| 10            | 6             | 0           | 9.015201                | 5.081617 | 2.083127 |

|    |   |   |           |          |          |
|----|---|---|-----------|----------|----------|
| 11 | 6 | 0 | 8.697921  | 3.822753 | 1.586012 |
| 12 | 6 | 0 | 9.526150  | 2.773257 | 1.110600 |
| 13 | 1 | 0 | 10.607021 | 2.803336 | 1.062178 |
| 14 | 6 | 0 | 8.687608  | 1.737333 | 0.733871 |
| 15 | 1 | 0 | 8.967288  | 0.775630 | 0.324881 |
| 16 | 6 | 0 | 7.355089  | 2.158252 | 0.980759 |
| 17 | 1 | 0 | 10.060091 | 5.371267 | 2.144017 |
| 18 | 1 | 0 | 6.516381  | 8.663002 | 3.690876 |
| 19 | 6 | 0 | 9.399648  | 8.069941 | 3.266448 |
| 20 | 1 | 0 | 10.131550 | 7.493581 | 3.845296 |
| 21 | 1 | 0 | 9.881563  | 8.349450 | 2.320474 |
| 22 | 1 | 0 | 9.194531  | 8.993199 | 3.816149 |
| 23 | 1 | 0 | 4.894718  | 6.605599 | 2.942624 |
| 24 | 6 | 0 | 6.085610  | 1.408017 | 0.745994 |
| 25 | 1 | 0 | 5.528522  | 1.297965 | 1.682772 |
| 26 | 1 | 0 | 5.436636  | 1.961405 | 0.058548 |
| 27 | 1 | 0 | 6.291437  | 0.418603 | 0.330237 |

DFT B3LYP/6-31++G(d,p) optimised ground state structure:

| Center<br>Number | Atomic<br>Number | Atomic<br>Type | Coordinates (Angstroms) |          |          |
|------------------|------------------|----------------|-------------------------|----------|----------|
|                  |                  |                | X                       | Y        | Z        |
| 1                | 5                | 0              | 6.125371                | 4.267408 | 1.917021 |
| 2                | 9                | 0              | 5.292820                | 4.488861 | 0.816593 |
| 3                | 9                | 0              | 5.420839                | 3.621409 | 2.936586 |
| 4                | 7                | 0              | 6.690664                | 5.627992 | 2.439265 |
| 5                | 7                | 0              | 7.364224                | 3.407348 | 1.490458 |
| 6                | 6                | 0              | 5.977294                | 6.661406 | 2.904559 |
| 7                | 6                | 0              | 6.834072                | 7.711766 | 3.284297 |
| 8                | 6                | 0              | 8.139143                | 7.296218 | 3.036820 |
| 9                | 6                | 0              | 8.038710                | 5.978125 | 2.503530 |
| 10               | 6                | 0              | 9.013392                | 5.082508 | 2.082100 |
| 11               | 6                | 0              | 8.691926                | 3.826499 | 1.586063 |
| 12               | 6                | 0              | 9.518744                | 2.778929 | 1.109362 |
| 13               | 1                | 0              | 10.596962               | 2.809530 | 1.059775 |
| 14               | 6                | 0              | 8.681686                | 1.743179 | 0.732965 |
| 15               | 1                | 0              | 8.962664                | 0.784814 | 0.324031 |
| 16               | 6                | 0              | 7.349596                | 2.160121 | 0.980504 |
| 17               | 1                | 0              | 10.057329               | 5.367676 | 2.139630 |
| 18               | 1                | 0              | 6.522691                | 8.661164 | 3.692747 |
| 19               | 6                | 0              | 9.401569                | 8.068010 | 3.266399 |
| 20               | 1                | 0              | 10.120820               | 7.500225 | 3.864180 |
| 21               | 1                | 0              | 9.892008                | 8.326063 | 2.321975 |
| 22               | 1                | 0              | 9.192411                | 8.999635 | 3.794601 |
| 23               | 1                | 0              | 4.899483                | 6.613195 | 2.949668 |
| 24               | 6                | 0              | 6.090774                | 1.398573 | 0.741582 |
| 25               | 1                | 0              | 5.532007                | 1.275984 | 1.673182 |
| 26               | 1                | 0              | 5.438789                | 1.939088 | 0.050294 |
| 27               | 1                | 0              | 6.314241                | 0.415346 | 0.327010 |

DFT mpw1pw91/6-31++G(d,p) optimised ground state structure:

| Center<br>Number | Atomic<br>Number | Atomic<br>Type | Coordinates (Angstroms) |          |          |
|------------------|------------------|----------------|-------------------------|----------|----------|
|                  |                  |                | X                       | Y        | Z        |
| 1                | 5                | 0              | 6.132420                | 4.267068 | 1.915680 |
| 2                | 9                | 0              | 5.306452                | 4.487185 | 0.818671 |
| 3                | 9                | 0              | 5.432000                | 3.624340 | 2.930896 |
| 4                | 7                | 0              | 6.695611                | 5.622644 | 2.435460 |
| 5                | 7                | 0              | 7.368423                | 3.412689 | 1.493485 |
| 6                | 6                | 0              | 5.982949                | 6.650769 | 2.896289 |
| 7                | 6                | 0              | 6.833959                | 7.699939 | 3.276753 |
| 8                | 6                | 0              | 8.135913                | 7.285606 | 3.032821 |
| 9                | 6                | 0              | 8.035115                | 5.971796 | 2.502340 |
| 10               | 6                | 0              | 9.009918                | 5.079638 | 2.085911 |
| 11               | 6                | 0              | 8.688647                | 3.827277 | 1.591058 |

|    |   |   |           |          |          |
|----|---|---|-----------|----------|----------|
| 12 | 6 | 0 | 9.514287  | 2.783042 | 1.118338 |
| 13 | 1 | 0 | 10.592287 | 2.813276 | 1.071452 |
| 14 | 6 | 0 | 8.679024  | 1.751373 | 0.741573 |
| 15 | 1 | 0 | 8.958145  | 0.792480 | 0.333546 |
| 16 | 6 | 0 | 7.351811  | 2.171365 | 0.986435 |
| 17 | 1 | 0 | 10.053094 | 5.365212 | 2.146293 |
| 18 | 1 | 0 | 6.520603  | 8.648759 | 3.684000 |
| 19 | 6 | 0 | 9.393033  | 8.053621 | 3.257925 |
| 20 | 1 | 0 | 10.133338 | 7.466646 | 3.807070 |
| 21 | 1 | 0 | 9.850303  | 8.356105 | 2.311159 |
| 22 | 1 | 0 | 9.193631  | 8.958914 | 3.831600 |
| 23 | 1 | 0 | 4.905372  | 6.599820 | 2.938592 |
| 24 | 6 | 0 | 6.095474  | 1.419257 | 0.747837 |
| 25 | 1 | 0 | 5.534064  | 1.306961 | 1.677948 |
| 26 | 1 | 0 | 5.450801  | 1.961737 | 0.052758 |
| 27 | 1 | 0 | 6.313557  | 0.433554 | 0.339307 |

DFT wb97xd/6-31++G(d,p) optimised ground state structure:

| Center Number | Atomic Number | Atomic Type | Coordinates (Angstroms) |          |           |
|---------------|---------------|-------------|-------------------------|----------|-----------|
|               |               |             | X                       | Y        | Z         |
| 1             | 5             | 0           | 6.131349                | 4.254167 | 1.945660  |
| 2             | 9             | 0           | 5.273514                | 4.464375 | 0.866291  |
| 3             | 9             | 0           | 5.461978                | 3.604273 | 2.983617  |
| 4             | 7             | 0           | 6.692720                | 5.616876 | 2.451661  |
| 5             | 7             | 0           | 7.367696                | 3.411711 | 1.493945  |
| 6             | 6             | 0           | 5.979702                | 6.642659 | 2.920463  |
| 7             | 6             | 0           | 6.830787                | 7.698951 | 3.291248  |
| 8             | 6             | 0           | 8.133503                | 7.289298 | 3.033303  |
| 9             | 6             | 0           | 8.034428                | 5.975370 | 2.503633  |
| 10            | 6             | 0           | 9.011052                | 5.090209 | 2.067923  |
| 11            | 6             | 0           | 8.691379                | 3.835379 | 1.573194  |
| 12            | 6             | 0           | 9.516183                | 2.798232 | 1.079384  |
| 13            | 1             | 0           | 10.595200               | 2.835101 | 1.015510  |
| 14            | 6             | 0           | 8.679849                | 1.762537 | 0.708249  |
| 15            | 1             | 0           | 8.959114                | 0.806588 | 0.288457  |
| 16            | 6             | 0           | 7.352580                | 2.174531 | 0.977041  |
| 17            | 1             | 0           | 10.054503               | 5.386649 | 2.112549  |
| 18            | 1             | 0           | 6.517483                | 8.649785 | 3.698851  |
| 19            | 6             | 0           | 9.399773                | 8.049742 | 3.270803  |
| 20            | 1             | 0           | 9.971108                | 7.617090 | 4.099052  |
| 21            | 1             | 0           | 10.042821               | 8.045797 | 2.385198  |
| 22            | 1             | 0           | 9.182144                | 9.089704 | 3.523229  |
| 23            | 1             | 0           | 4.901097                | 6.585325 | 2.971835  |
| 24            | 6             | 0           | 6.090030                | 1.420199 | 0.737615  |
| 25            | 1             | 0           | 5.478215                | 1.395392 | 1.642937  |
| 26            | 1             | 0           | 5.497888                | 1.911728 | -0.040078 |
| 27            | 1             | 0           | 6.314133                | 0.399402 | 0.423630  |

DFT B3LYP/6-31G(d) optimised 1<sup>st</sup> excited-state structure:

| Center Number | Atomic Number | Atomic Type | Coordinates (Angstroms) |          |          |
|---------------|---------------|-------------|-------------------------|----------|----------|
|               |               |             | X                       | Y        | Z        |
| 1             | 5             | 0           | 6.179415                | 4.238760 | 1.934548 |
| 2             | 9             | 0           | 5.316725                | 4.532490 | 0.888061 |
| 3             | 9             | 0           | 5.504130                | 3.634231 | 2.985370 |
| 4             | 7             | 0           | 6.748786                | 5.618682 | 2.474704 |
| 5             | 7             | 0           | 7.396820                | 3.422124 | 1.476008 |
| 6             | 6             | 0           | 5.949179                | 6.626069 | 2.976916 |
| 7             | 6             | 0           | 6.756801                | 7.657793 | 3.347222 |
| 8             | 6             | 0           | 8.176178                | 7.239686 | 3.042444 |
| 9             | 6             | 0           | 8.099910                | 5.989473 | 2.513769 |
| 10            | 6             | 0           | 9.114871                | 5.058120 | 2.024841 |
| 11            | 6             | 0           | 8.743690                | 3.829696 | 1.531315 |
| 12            | 6             | 0           | 9.532811                | 2.759507 | 1.002579 |

|    |   |   |           |          |          |
|----|---|---|-----------|----------|----------|
| 13 | 1 | 0 | 10.610534 | 2.772571 | 0.912573 |
| 14 | 6 | 0 | 8.657971  | 1.742320 | 0.644120 |
| 15 | 1 | 0 | 8.909856  | 0.783051 | 0.210574 |
| 16 | 6 | 0 | 7.346944  | 2.167150 | 0.942516 |
| 17 | 1 | 0 | 10.157532 | 5.344329 | 2.055139 |
| 18 | 1 | 0 | 6.464511  | 8.605915 | 3.779144 |
| 19 | 6 | 0 | 9.367351  | 8.088362 | 3.300338 |
| 20 | 1 | 0 | 9.438353  | 8.350572 | 4.366058 |
| 21 | 1 | 0 | 10.296236 | 7.594128 | 3.006489 |
| 22 | 1 | 0 | 9.295669  | 9.040506 | 2.754588 |
| 23 | 1 | 0 | 4.878546  | 6.502604 | 3.018903 |
| 24 | 6 | 0 | 6.059730  | 1.439748 | 0.745053 |
| 25 | 1 | 0 | 5.530898  | 1.314083 | 1.697759 |
| 26 | 1 | 0 | 5.387645  | 2.004578 | 0.087523 |
| 27 | 1 | 0 | 6.239138  | 0.454524 | 0.306644 |

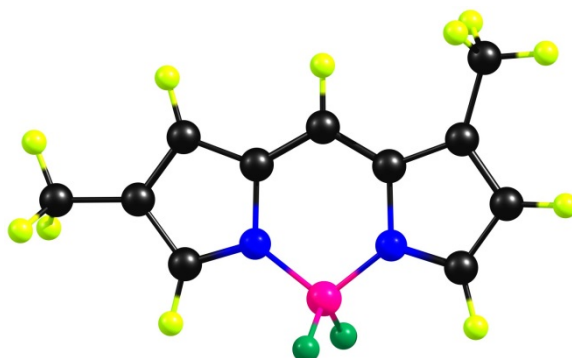

Figure S-12: DFT B3LYP/6-31G(d) optimised ground-state structure of **2.07**

**DFT B3LYP/6-31G(d) optimised ground state structure:**

| Center Number | Atomic Number | Atomic Type | Coordinates (Angstroms) |           |           |
|---------------|---------------|-------------|-------------------------|-----------|-----------|
|               |               |             | X                       | Y         | Z         |
| 1             | 5             | 0           | 6.125667                | 4.223315  | 1.979315  |
| 2             | 9             | 0           | 5.254707                | 4.410620  | 0.923378  |
| 3             | 9             | 0           | 5.516212                | 3.569699  | 3.033755  |
| 4             | 7             | 0           | 6.691372                | 5.609119  | 2.462800  |
| 5             | 7             | 0           | 7.382337                | 3.405893  | 1.500128  |
| 6             | 6             | 0           | 5.976108                | 6.641687  | 2.925891  |
| 7             | 6             | 0           | 6.827567                | 7.704273  | 3.292772  |
| 8             | 6             | 0           | 8.133857                | 7.297268  | 3.038908  |
| 9             | 6             | 0           | 8.038273                | 5.972069  | 2.514642  |
| 10            | 6             | 0           | 9.019061                | 5.086908  | 2.081194  |
| 11            | 6             | 0           | 8.708508                | 3.826428  | 1.578404  |
| 12            | 6             | 0           | 9.529126                | 2.785256  | 1.071634  |
| 13            | 1             | 0           | 10.609372               | 2.817909  | 1.000975  |
| 14            | 6             | 0           | 8.697754                | 1.739283  | 0.687565  |
| 15            | 6             | 0           | 7.378247                | 2.174333  | 0.974324  |
| 16            | 1             | 0           | 10.061571               | 5.387651  | 2.129817  |
| 17            | 1             | 0           | 6.511711                | 8.657352  | 3.696087  |
| 18            | 6             | 0           | 9.393930                | 8.081381  | 3.248816  |
| 19            | 1             | 0           | 10.140902               | 7.510857  | 3.813840  |
| 20            | 1             | 0           | 9.856955                | 8.367986  | 2.295531  |
| 21            | 1             | 0           | 9.188996                | 9.001289  | 3.804111  |
| 22            | 1             | 0           | 4.896979                | 6.583067  | 2.979734  |
| 23            | 1             | 0           | 6.445374                | 1.646345  | 0.821507  |
| 24            | 6             | 0           | 9.084087                | 0.417561  | 0.090183  |
| 25            | 1             | 0           | 8.741454                | -0.422460 | 0.706951  |
| 26            | 1             | 0           | 8.652048                | 0.281300  | -0.909066 |
| 27            | 1             | 0           | 10.171170               | 0.335873  | -0.005805 |

**DFT B3LYP/6-31++G(d,p) optimised ground state structure:**

| Center<br>Number | Atomic<br>Number | Atomic<br>Type | Coordinates (Angstroms) |           |           |
|------------------|------------------|----------------|-------------------------|-----------|-----------|
|                  |                  |                | X                       | Y         | Z         |
| 1                | 5                | 0              | 6.135568                | 4.239615  | 1.947744  |
| 2                | 9                | 0              | 5.285244                | 4.449576  | 0.862932  |
| 3                | 9                | 0              | 5.467379                | 3.574543  | 2.974971  |
| 4                | 7                | 0              | 6.694516                | 5.607679  | 2.466097  |
| 5                | 7                | 0              | 7.384851                | 3.408004  | 1.495492  |
| 6                | 6                | 0              | 5.980208                | 6.629646  | 2.951508  |
| 7                | 6                | 0              | 6.832239                | 7.689381  | 3.318819  |
| 8                | 6                | 0              | 8.135956                | 7.291614  | 3.041664  |
| 9                | 6                | 0              | 8.040607                | 5.973849  | 2.503518  |
| 10               | 6                | 0              | 9.019306                | 5.095251  | 2.059129  |
| 11               | 6                | 0              | 8.707640                | 3.834757  | 1.562355  |
| 12               | 6                | 0              | 9.527966                | 2.791478  | 1.061369  |
| 13               | 1                | 0              | 10.605244               | 2.827302  | 0.986253  |
| 14               | 6                | 0              | 8.697897                | 1.739878  | 0.694297  |
| 15               | 6                | 0              | 7.379753                | 2.170813  | 0.983085  |
| 16               | 1                | 0              | 10.059451               | 5.397300  | 2.098566  |
| 17               | 1                | 0              | 6.517477                | 8.632487  | 3.739064  |
| 18               | 6                | 0              | 9.392263                | 8.079857  | 3.246223  |
| 19               | 1                | 0              | 10.146871               | 7.506911  | 3.792942  |
| 20               | 1                | 0              | 9.836921                | 8.380581  | 2.291699  |
| 21               | 1                | 0              | 9.187764                | 8.988332  | 3.814996  |
| 22               | 1                | 0              | 4.904179                | 6.568241  | 3.019649  |
| 23               | 1                | 0              | 6.450157                | 1.638459  | 0.840438  |
| 24               | 6                | 0              | 9.083727                | 0.412839  | 0.111889  |
| 25               | 1                | 0              | 8.763951                | -0.415214 | 0.751832  |
| 26               | 1                | 0              | 8.629748                | 0.258189  | -0.871698 |
| 27               | 1                | 0              | 10.166465               | 0.340894  | -0.007442 |

**DFT mpw1pw91/6-31++G(d,p) optimised ground state structure:**

| Center<br>Number | Atomic<br>Number | Atomic<br>Type | Coordinates (Angstroms) |           |           |
|------------------|------------------|----------------|-------------------------|-----------|-----------|
|                  |                  |                | X                       | Y         | Z         |
| 1                | 5                | 0              | 6.143811                | 4.240849  | 1.947291  |
| 2                | 9                | 0              | 5.299066                | 4.449786  | 0.866630  |
| 3                | 9                | 0              | 5.480714                | 3.578691  | 2.970521  |
| 4                | 7                | 0              | 6.700934                | 5.603490  | 2.463144  |
| 5                | 7                | 0              | 7.389637                | 3.414165  | 1.497520  |
| 6                | 6                | 0              | 5.987835                | 6.620146  | 2.944901  |
| 7                | 6                | 0              | 6.834746                | 7.678424  | 3.312543  |
| 8                | 6                | 0              | 8.135046                | 7.281630  | 3.037908  |
| 9                | 6                | 0              | 8.038615                | 5.968377  | 2.502220  |
| 10               | 6                | 0              | 9.016835                | 5.093751  | 2.060789  |
| 11               | 6                | 0              | 8.705245                | 3.836977  | 1.564973  |
| 12               | 6                | 0              | 9.524219                | 2.798075  | 1.066204  |
| 13               | 1                | 0              | 10.601209               | 2.833775  | 0.992124  |
| 14               | 6                | 0              | 8.695933                | 1.750359  | 0.699107  |
| 15               | 6                | 0              | 7.382554                | 2.182994  | 0.987095  |
| 16               | 1                | 0              | 10.056187               | 5.396691  | 2.101661  |
| 17               | 1                | 0              | 6.518606                | 8.621073  | 3.731759  |
| 18               | 6                | 0              | 9.386743                | 8.064266  | 3.240639  |
| 19               | 1                | 0              | 10.143000               | 7.486914  | 3.778109  |
| 20               | 1                | 0              | 9.824323                | 8.370789  | 2.285940  |
| 21               | 1                | 0              | 9.186054                | 8.967836  | 3.816461  |
| 22               | 1                | 0              | 4.912018                | 6.556463  | 3.010832  |
| 23               | 1                | 0              | 6.451806                | 1.653187  | 0.844287  |
| 24               | 6                | 0              | 9.077961                | 0.429025  | 0.119181  |
| 25               | 1                | 0              | 8.758601                | -0.397158 | 0.759793  |
| 26               | 1                | 0              | 8.622305                | 0.275330  | -0.862489 |
| 27               | 1                | 0              | 10.159344               | 0.356360  | -0.001753 |

**DFT wb97xd/6-31++G(d,p) optimised ground state structure:**



| Center<br>Number | Atomic<br>Number | Atomic<br>Type | Coordinates (Angstroms) |           |           |
|------------------|------------------|----------------|-------------------------|-----------|-----------|
|                  |                  |                | X                       | Y         | Z         |
| 1                | 5                | 0              | 6.141638                | 4.234671  | 1.960616  |
| 2                | 9                | 0              | 5.285537                | 4.441625  | 0.882921  |
| 3                | 9                | 0              | 5.486908                | 3.568935  | 2.992792  |
| 4                | 7                | 0              | 6.697870                | 5.600673  | 2.473032  |
| 5                | 7                | 0              | 7.388150                | 3.412250  | 1.501495  |
| 6                | 6                | 0              | 5.985046                | 6.615406  | 2.961479  |
| 7                | 6                | 0              | 6.832331                | 7.679943  | 3.321557  |
| 8                | 6                | 0              | 8.132750                | 7.287054  | 3.035162  |
| 9                | 6                | 0              | 8.038154                | 5.973618  | 2.499027  |
| 10               | 6                | 0              | 9.017152                | 5.104538  | 2.042157  |
| 11               | 6                | 0              | 8.706339                | 3.843107  | 1.550403  |
| 12               | 6                | 0              | 9.524160                | 2.806808  | 1.040846  |
| 13               | 1                | 0              | 10.602085               | 2.845846  | 0.950966  |
| 14               | 6                | 0              | 8.694629                | 1.753484  | 0.686318  |
| 15               | 6                | 0              | 7.381607                | 2.179371  | 0.991431  |
| 16               | 1                | 0              | 10.056862               | 5.416428  | 2.068459  |
| 17               | 1                | 0              | 6.517444                | 8.624746  | 3.741865  |
| 18               | 6                | 0              | 9.393104                | 8.061876  | 3.255358  |
| 19               | 1                | 0              | 9.986519                | 7.628237  | 4.067388  |
| 20               | 1                | 0              | 10.018643               | 8.077720  | 2.357394  |
| 21               | 1                | 0              | 9.164877                | 9.095452  | 3.523954  |
| 22               | 1                | 0              | 4.908224                | 6.547109  | 3.034707  |
| 23               | 1                | 0              | 6.450652                | 1.643337  | 0.860355  |
| 24               | 6                | 0              | 9.078345                | 0.428604  | 0.100181  |
| 25               | 1                | 0              | 8.776138                | -0.398418 | 0.750394  |
| 26               | 1                | 0              | 8.607478                | 0.272201  | -0.875460 |
| 27               | 1                | 0              | 10.160705               | 0.367641  | -0.037406 |

**DFT B3LYP/6-31G(d) optimised 1<sup>st</sup> excited-state structure:**

| Center<br>Number | Atomic<br>Number | Atomic<br>Type | Coordinates (Angstroms) |           |           |
|------------------|------------------|----------------|-------------------------|-----------|-----------|
|                  |                  |                | X                       | Y         | Z         |
| 1                | 5                | 0              | 6.224050                | 4.103282  | 2.326311  |
| 2                | 9                | 0              | 5.114136                | 4.046982  | 1.504947  |
| 3                | 9                | 0              | 5.990221                | 3.492850  | 3.549119  |
| 4                | 7                | 0              | 6.731742                | 5.550116  | 2.487614  |
| 5                | 7                | 0              | 7.423388                | 3.346010  | 1.634036  |
| 6                | 6                | 0              | 5.971087                | 6.635644  | 2.747625  |
| 7                | 6                | 0              | 6.791390                | 7.738850  | 3.054006  |
| 8                | 6                | 0              | 8.117760                | 7.325359  | 2.982994  |
| 9                | 6                | 0              | 8.086311                | 5.933609  | 2.604342  |
| 10               | 6                | 0              | 9.098384                | 5.058876  | 2.301111  |
| 11               | 6                | 0              | 8.760615                | 3.756413  | 1.720109  |
| 12               | 6                | 0              | 9.519297                | 2.813943  | 1.108502  |
| 13               | 1                | 0              | 10.594462               | 2.817635  | 0.981831  |
| 14               | 6                | 0              | 8.588414                | 1.743945  | 0.603705  |
| 15               | 6                | 0              | 7.327435                | 2.158014  | 0.954109  |
| 16               | 1                | 0              | 10.138300               | 5.343634  | 2.390409  |
| 17               | 1                | 0              | 6.439566                | 8.733637  | 3.296689  |
| 18               | 6                | 0              | 9.357813                | 8.132736  | 3.196601  |
| 19               | 1                | 0              | 9.974681                | 7.727096  | 4.010467  |
| 20               | 1                | 0              | 9.991226                | 8.153265  | 2.298564  |
| 21               | 1                | 0              | 9.111331                | 9.167805  | 3.452003  |
| 22               | 1                | 0              | 4.892398                | 6.568378  | 2.721362  |
| 23               | 1                | 0              | 6.366108                | 1.693674  | 0.795891  |
| 24               | 6                | 0              | 9.007851                | 0.512779  | -0.104299 |
| 25               | 1                | 0              | 8.153292                | -0.111279 | -0.377934 |
| 26               | 1                | 0              | 9.570439                | 0.755648  | -1.019050 |
| 27               | 1                | 0              | 9.691649                | -0.086638 | 0.516328  |

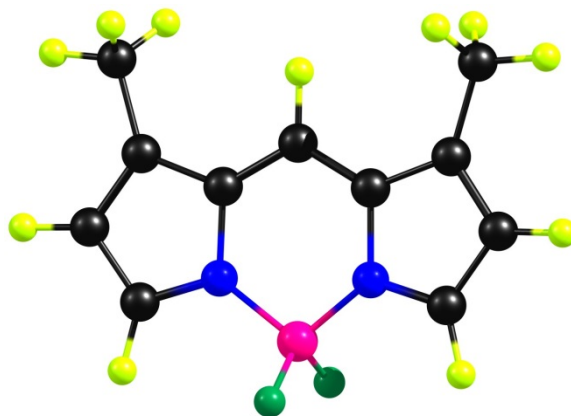

Figure S-13: DFT B3LYP/6-31G(d) optimised ground-state structure of **2.08**

**DFT B3LYP/6-31G(d) optimised ground state structure:**

| Center Number | Atomic Number | Atomic Type | Coordinates (Angstroms) |          |          |
|---------------|---------------|-------------|-------------------------|----------|----------|
|               |               |             | X                       | Y        | Z        |
| 1             | 5             | 0           | 6.136093                | 4.184600 | 2.061034 |
| 2             | 9             | 0           | 5.196238                | 4.307370 | 1.056530 |
| 3             | 9             | 0           | 5.611306                | 3.560977 | 3.178345 |
| 4             | 7             | 0           | 6.694260                | 5.600961 | 2.455611 |
| 5             | 7             | 0           | 7.383057                | 3.380444 | 1.539757 |
| 6             | 6             | 0           | 5.977308                | 6.661207 | 2.847665 |
| 7             | 6             | 0           | 6.830500                | 7.725876 | 3.205022 |
| 8             | 6             | 0           | 8.139313                | 7.290227 | 3.020715 |
| 9             | 6             | 0           | 8.043325                | 5.946882 | 2.545212 |
| 10            | 6             | 0           | 9.025321                | 5.041189 | 2.157145 |
| 11            | 6             | 0           | 8.714682                | 3.782588 | 1.652549 |
| 12            | 6             | 0           | 9.550286                | 2.741589 | 1.144630 |
| 13            | 6             | 0           | 8.691044                | 1.727930 | 0.731171 |
| 14            | 6             | 0           | 7.373708                | 2.159551 | 0.990956 |
| 15            | 1             | 0           | 10.068639               | 5.333951 | 2.231995 |
| 16            | 1             | 0           | 6.514172                | 8.700340 | 3.553137 |
| 17            | 6             | 0           | 9.402605                | 8.065189 | 3.245422 |
| 18            | 1             | 0           | 10.105699               | 7.522362 | 3.888943 |
| 19            | 1             | 0           | 9.922483                | 8.276454 | 2.301928 |
| 20            | 1             | 0           | 9.187652                | 9.024882 | 3.724315 |
| 21            | 1             | 0           | 4.896150                | 6.619337 | 2.860800 |
| 22            | 1             | 0           | 6.438994                | 1.645580 | 0.809375 |
| 23            | 1             | 0           | 8.970531                | 0.781629 | 0.287065 |
| 24            | 6             | 0           | 11.046666               | 2.765133 | 1.059416 |
| 25            | 1             | 0           | 11.400397               | 3.512042 | 0.336860 |
| 26            | 1             | 0           | 11.507007               | 3.004862 | 2.025718 |
| 27            | 1             | 0           | 11.431309               | 1.791870 | 0.741038 |

**DFT B3LYP/6-31++G(d,p) optimised ground state structure:**

| Center Number | Atomic Number | Atomic Type | Coordinates (Angstroms) |          |          |
|---------------|---------------|-------------|-------------------------|----------|----------|
|               |               |             | X                       | Y        | Z        |
| 1             | 5             | 0           | 6.139418                | 4.216959 | 1.985063 |
| 2             | 9             | 0           | 5.275799                | 4.394555 | 0.904956 |
| 3             | 9             | 0           | 5.483449                | 3.579165 | 3.038056 |
| 4             | 7             | 0           | 6.697562                | 5.600792 | 2.461576 |
| 5             | 7             | 0           | 7.386992                | 3.378272 | 1.544891 |
| 6             | 6             | 0           | 5.982709                | 6.641481 | 2.904264 |
| 7             | 6             | 0           | 6.836888                | 7.702989 | 3.262096 |
| 8             | 6             | 0           | 8.142383                | 7.285930 | 3.025038 |
| 9             | 6             | 0           | 8.045668                | 5.955527 | 2.519253 |

|    |   |   |           |          |          |
|----|---|---|-----------|----------|----------|
| 10 | 6 | 0 | 9.025833  | 5.060135 | 2.111603 |
| 11 | 6 | 0 | 8.715668  | 3.795643 | 1.628398 |
| 12 | 6 | 0 | 9.551672  | 2.742780 | 1.151197 |
| 13 | 6 | 0 | 8.696801  | 1.707151 | 0.789095 |
| 14 | 6 | 0 | 7.380078  | 2.136756 | 1.046280 |
| 15 | 1 | 0 | 10.066037 | 5.359509 | 2.168096 |
| 16 | 1 | 0 | 6.522038  | 8.660280 | 3.648918 |
| 17 | 6 | 0 | 9.402153  | 8.067033 | 3.236558 |
| 18 | 1 | 0 | 10.123102 | 7.516518 | 3.848333 |
| 19 | 1 | 0 | 9.891883  | 8.304107 | 2.286338 |
| 20 | 1 | 0 | 9.189403  | 9.010302 | 3.742128 |
| 21 | 1 | 0 | 4.904930  | 6.591754 | 2.950588 |
| 22 | 1 | 0 | 6.451090  | 1.607368 | 0.894772 |
| 23 | 1 | 0 | 8.976956  | 0.746314 | 0.384778 |
| 24 | 6 | 0 | 11.045407 | 2.769641 | 1.051622 |
| 25 | 1 | 0 | 11.384847 | 3.491188 | 0.301216 |
| 26 | 1 | 0 | 11.510710 | 3.043287 | 2.003312 |
| 27 | 1 | 0 | 11.429270 | 1.789589 | 0.763928 |

DFT mpw1pw91/6-31++G(d,p) optimised ground state structure:

| Center<br>Number | Atomic<br>Number | Atomic<br>Type | Coordinates (Angstroms) |          |          |
|------------------|------------------|----------------|-------------------------|----------|----------|
|                  |                  |                | X                       | Y        | Z        |
| 1                | 5                | 0              | 6.150860                | 4.208763 | 2.013583 |
| 2                | 9                | 0              | 5.252195                | 4.361221 | 0.968130 |
| 3                | 9                | 0              | 5.548037                | 3.576567 | 3.092891 |
| 4                | 7                | 0              | 6.704846                | 5.599081 | 2.454719 |
| 5                | 7                | 0              | 7.390928                | 3.387290 | 1.542454 |
| 6                | 6                | 0              | 5.990561                | 6.641793 | 2.874837 |
| 7                | 6                | 0              | 6.839919                | 7.701374 | 3.233604 |
| 8                | 6                | 0              | 8.142977                | 7.276786 | 3.020533 |
| 9                | 6                | 0              | 8.045319                | 5.946859 | 2.528090 |
| 10               | 6                | 0              | 9.024827                | 5.051222 | 2.132425 |
| 11               | 6                | 0              | 8.712901                | 3.794715 | 1.640483 |
| 12               | 6                | 0              | 9.546793                | 2.751183 | 1.154236 |
| 13               | 6                | 0              | 8.692838                | 1.728020 | 0.770191 |
| 14               | 6                | 0              | 7.380931                | 2.159533 | 1.026284 |
| 15               | 1                | 0              | 10.065250               | 5.346411 | 2.199164 |
| 16               | 1                | 0              | 6.523271                | 8.663718 | 3.605029 |
| 17               | 6                | 0              | 9.398815                | 8.049764 | 3.235277 |
| 18               | 1                | 0              | 10.126625               | 7.484609 | 3.822820 |
| 19               | 1                | 0              | 9.874283                | 8.310276 | 2.285075 |
| 20               | 1                | 0              | 9.192398                | 8.979238 | 3.766133 |
| 21               | 1                | 0              | 4.912362                | 6.594568 | 2.906289 |
| 22               | 1                | 0              | 6.449807                | 1.638193 | 0.862129 |
| 23               | 1                | 0              | 8.970845                | 0.773392 | 0.350999 |
| 24               | 6                | 0              | 11.033916               | 2.778464 | 1.062189 |
| 25               | 1                | 0              | 11.373549               | 3.484155 | 0.298368 |
| 26               | 1                | 0              | 11.492703               | 3.073366 | 2.009251 |
| 27               | 1                | 0              | 11.420990               | 1.794461 | 0.797173 |

DFT wb97xd/6-31++G(d,p) optimised ground state structure:

| Center<br>Number | Atomic<br>Number | Atomic<br>Type | Coordinates (Angstroms) |          |          |
|------------------|------------------|----------------|-------------------------|----------|----------|
|                  |                  |                | X                       | Y        | Z        |
| 1                | 5                | 0              | 6.142635                | 4.219247 | 1.981994 |
| 2                | 9                | 0              | 5.284049                | 4.398742 | 0.901156 |
| 3                | 9                | 0              | 5.487753                | 3.582538 | 3.033138 |
| 4                | 7                | 0              | 6.700634                | 5.598085 | 2.458153 |
| 5                | 7                | 0              | 7.387542                | 3.383608 | 1.544735 |
| 6                | 6                | 0              | 5.987843                | 6.634809 | 2.898841 |
| 7                | 6                | 0              | 6.839182                | 7.695964 | 3.259598 |
| 8                | 6                | 0              | 8.142216                | 7.277119 | 3.024676 |
| 9                | 6                | 0              | 8.044429                | 5.952084 | 2.519631 |
| 10               | 6                | 0              | 9.024928                | 5.058557 | 2.114724 |

|    |   |   |           |          |          |
|----|---|---|-----------|----------|----------|
| 11 | 6 | 0 | 8.712979  | 3.796788 | 1.630628 |
| 12 | 6 | 0 | 9.547087  | 2.748043 | 1.156552 |
| 13 | 6 | 0 | 8.694721  | 1.714006 | 0.792194 |
| 14 | 6 | 0 | 7.380001  | 2.146720 | 1.047616 |
| 15 | 1 | 0 | 10.067560 | 5.357048 | 2.175145 |
| 16 | 1 | 0 | 6.524890  | 8.654879 | 3.647261 |
| 17 | 6 | 0 | 9.406514  | 8.049592 | 3.231221 |
| 18 | 1 | 0 | 10.148923 | 7.464776 | 3.783290 |
| 19 | 1 | 0 | 9.854221  | 8.338781 | 2.274364 |
| 20 | 1 | 0 | 9.211745  | 8.963286 | 3.796755 |
| 21 | 1 | 0 | 4.908592  | 6.580785 | 2.941653 |
| 22 | 1 | 0 | 6.446936  | 1.621413 | 0.896031 |
| 23 | 1 | 0 | 8.976289  | 0.751960 | 0.387513 |
| 24 | 6 | 0 | 11.039428 | 2.785341 | 1.059858 |
| 25 | 1 | 0 | 11.367424 | 3.460462 | 0.262188 |
| 26 | 1 | 0 | 11.494077 | 3.128212 | 1.994574 |
| 27 | 1 | 0 | 11.436147 | 1.792176 | 0.838864 |

DFT B3LYP/6-31G(d) optimised 1<sup>st</sup> excited-state structure:

| Center Number | Atomic Number | Atomic Type | Coordinates (Angstroms) |          |           |
|---------------|---------------|-------------|-------------------------|----------|-----------|
|               |               |             | X                       | Y        | Z         |
| 1             | 5             | 0           | 6.203492                | 4.172710 | 2.166585  |
| 2             | 9             | 0           | 5.168138                | 4.167203 | 1.252791  |
| 3             | 9             | 0           | 5.867887                | 3.498286 | 3.330282  |
| 4             | 7             | 0           | 6.726569                | 5.590743 | 2.434671  |
| 5             | 7             | 0           | 7.436665                | 3.393411 | 1.536231  |
| 6             | 6             | 0           | 5.971665                | 6.673144 | 2.745539  |
| 7             | 6             | 0           | 6.798267                | 7.739006 | 3.133475  |
| 8             | 6             | 0           | 8.122290                | 7.306554 | 3.063927  |
| 9             | 6             | 0           | 8.078618                | 5.941691 | 2.608379  |
| 10            | 6             | 0           | 9.092428                | 5.064627 | 2.302233  |
| 11            | 6             | 0           | 8.776048                | 3.774841 | 1.684233  |
| 12            | 6             | 0           | 9.550470                | 2.810777 | 1.118790  |
| 13            | 6             | 0           | 8.600308                | 1.764943 | 0.582852  |
| 14            | 6             | 0           | 7.338436                | 2.193129 | 0.861633  |
| 15            | 1             | 0           | 10.127793               | 5.345007 | 2.441986  |
| 16            | 1             | 0           | 6.457793                | 8.723960 | 3.426632  |
| 17            | 6             | 0           | 9.368536                | 8.079078 | 3.357529  |
| 18            | 1             | 0           | 9.958541                | 7.614257 | 4.159724  |
| 19            | 1             | 0           | 10.025303               | 8.145818 | 2.478626  |
| 20            | 1             | 0           | 9.131076                | 9.100272 | 3.671061  |
| 21            | 1             | 0           | 4.893340                | 6.625100 | 2.686431  |
| 22            | 1             | 0           | 6.371347                | 1.758630 | 0.663563  |
| 23            | 1             | 0           | 8.895374                | 0.853960 | 0.078867  |
| 24            | 6             | 0           | 11.028485               | 2.731761 | 0.997267  |
| 25            | 1             | 0           | 11.329998               | 2.654195 | -0.057555 |
| 26            | 1             | 0           | 11.524665               | 3.602069 | 1.432994  |
| 27            | 1             | 0           | 11.415213               | 1.829852 | 1.493609  |

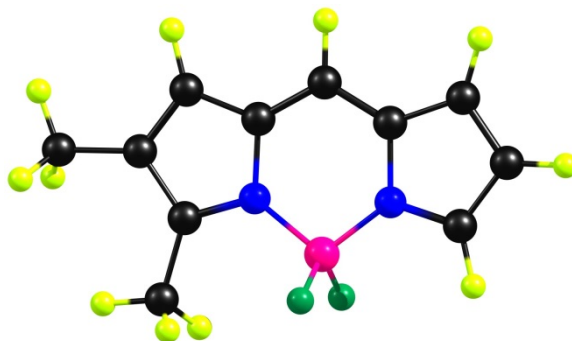

Figure S-14: DFT B3LYP/6-31G(d) optimised ground-state structure of **2.09**

### DFT B3LYP/6-31G(d) optimised ground state structure:

| Center<br>Number | Atomic<br>Number | Atomic<br>Type | Coordinates (Angstroms) |          |          |
|------------------|------------------|----------------|-------------------------|----------|----------|
|                  |                  |                | X                       | Y        | Z        |
| 1                | 5                | 0              | 6.133855                | 4.244621 | 1.896647 |
| 2                | 9                | 0              | 5.334078                | 4.426998 | 0.779435 |
| 3                | 9                | 0              | 5.431765                | 3.633953 | 2.923887 |
| 4                | 7                | 0              | 6.692126                | 5.634229 | 2.385111 |
| 5                | 7                | 0              | 7.391407                | 3.387415 | 1.522355 |
| 6                | 6                | 0              | 5.966741                | 6.684212 | 2.806455 |
| 7                | 6                | 0              | 6.835907                | 7.762514 | 3.165633 |
| 8                | 6                | 0              | 8.126343                | 7.313866 | 2.940931 |
| 9                | 6                | 0              | 8.042754                | 5.982390 | 2.452340 |
| 10               | 6                | 0              | 9.026399                | 5.082703 | 2.074814 |
| 11               | 6                | 0              | 8.717655                | 3.800118 | 1.614561 |
| 12               | 6                | 0              | 9.544797                | 2.734934 | 1.182956 |
| 13               | 6                | 0              | 8.704246                | 1.682907 | 0.832191 |
| 14               | 6                | 0              | 7.386419                | 2.126844 | 1.056400 |
| 15               | 1                | 0              | 10.068112               | 5.382828 | 2.138350 |
| 16               | 1                | 0              | 6.453186                | 1.601160 | 0.904509 |
| 17               | 1                | 0              | 8.987985                | 0.708542 | 0.458928 |
| 18               | 1                | 0              | 10.626106               | 2.759076 | 1.142624 |
| 19               | 1                | 0              | 9.045763                | 7.863049 | 3.102145 |
| 20               | 6                | 0              | 6.404717                | 9.104158 | 3.681432 |
| 21               | 1                | 0              | 5.763713                | 9.632291 | 2.964209 |
| 22               | 1                | 0              | 5.839033                | 9.020674 | 4.618050 |
| 23               | 1                | 0              | 7.273607                | 9.739882 | 3.876961 |
| 24               | 6                | 0              | 4.475012                | 6.644101 | 2.859576 |
| 25               | 1                | 0              | 4.064754                | 6.437719 | 1.864975 |
| 26               | 1                | 0              | 4.139714                | 5.829201 | 3.510460 |
| 27               | 1                | 0              | 4.068347                | 7.588847 | 3.227479 |

### DFT B3LYP/6-31++G(d,p) optimised ground state structure:

| Center<br>Number | Atomic<br>Number | Atomic<br>Type | Coordinates (Angstroms) |          |          |
|------------------|------------------|----------------|-------------------------|----------|----------|
|                  |                  |                | X                       | Y        | Z        |
| 1                | 5                | 0              | 6.144990                | 4.241926 | 1.895907 |
| 2                | 9                | 0              | 5.330324                | 4.418133 | 0.774334 |
| 3                | 9                | 0              | 5.429162                | 3.623674 | 2.924504 |
| 4                | 7                | 0              | 6.688474                | 5.631963 | 2.384525 |
| 5                | 7                | 0              | 7.394943                | 3.385195 | 1.521900 |
| 6                | 6                | 0              | 5.962756                | 6.681761 | 2.805774 |
| 7                | 6                | 0              | 6.833927                | 7.757750 | 3.163297 |
| 8                | 6                | 0              | 8.122462                | 7.309458 | 2.938427 |
| 9                | 6                | 0              | 8.039039                | 5.978517 | 2.450493 |
| 10               | 6                | 0              | 9.023801                | 5.083781 | 2.074632 |
| 11               | 6                | 0              | 8.717912                | 3.801634 | 1.614955 |
| 12               | 6                | 0              | 9.546047                | 2.739543 | 1.184459 |
| 13               | 6                | 0              | 8.707791                | 1.685840 | 0.833659 |
| 14               | 6                | 0              | 7.390475                | 2.124190 | 1.056178 |
| 15               | 1                | 0              | 10.062415               | 5.386245 | 2.138647 |
| 16               | 1                | 0              | 6.461529                | 1.595760 | 0.903631 |
| 17               | 1                | 0              | 8.993691                | 0.714625 | 0.461665 |
| 18               | 1                | 0              | 10.624681               | 2.764894 | 1.144245 |
| 19               | 1                | 0              | 9.040958                | 7.855687 | 3.098031 |
| 20               | 6                | 0              | 6.405256                | 9.098917 | 3.678552 |
| 21               | 1                | 0              | 5.766550                | 9.624397 | 2.961543 |
| 22               | 1                | 0              | 5.842464                | 9.013983 | 4.613553 |
| 23               | 1                | 0              | 7.273871                | 9.730926 | 3.872162 |
| 24               | 6                | 0              | 4.473698                | 6.654373 | 2.864099 |
| 25               | 1                | 0              | 4.054931                | 6.455701 | 1.873844 |
| 26               | 1                | 0              | 4.130507                | 5.848152 | 3.518063 |
| 27               | 1                | 0              | 4.081888                | 7.602208 | 3.232338 |

### DFT mpw1pw91/6-31++G(d,p) optimised ground state structure:

| Center<br>Number | Atomic<br>Number | Atomic<br>Type | Coordinates (Angstroms) |          |          |
|------------------|------------------|----------------|-------------------------|----------|----------|
|                  |                  |                | X                       | Y        | Z        |
| 1                | 5                | 0              | 6.148596                | 4.249915 | 1.897992 |
| 2                | 9                | 0              | 5.339383                | 4.427595 | 0.781130 |
| 3                | 9                | 0              | 5.436946                | 3.635789 | 2.922764 |
| 4                | 7                | 0              | 6.693720                | 5.632392 | 2.384273 |
| 5                | 7                | 0              | 7.393564                | 3.395978 | 1.525578 |
| 6                | 6                | 0              | 5.970241                | 6.676019 | 2.803190 |
| 7                | 6                | 0              | 6.836034                | 7.750350 | 3.160923 |
| 8                | 6                | 0              | 8.121217                | 7.304223 | 2.937279 |
| 9                | 6                | 0              | 8.036212                | 5.977515 | 2.450635 |
| 10               | 6                | 0              | 9.018413                | 5.085411 | 2.076008 |
| 11               | 6                | 0              | 8.709808                | 3.807229 | 1.617537 |
| 12               | 6                | 0              | 9.534894                | 2.748495 | 1.188538 |
| 13               | 6                | 0              | 8.697071                | 1.699399 | 0.838980 |
| 14               | 6                | 0              | 7.385328                | 2.140889 | 1.062022 |
| 15               | 1                | 0              | 10.056876               | 5.386397 | 2.139887 |
| 16               | 1                | 0              | 6.454429                | 1.616054 | 0.910477 |
| 17               | 1                | 0              | 8.979954                | 0.727750 | 0.466927 |
| 18               | 1                | 0              | 10.613211               | 2.772934 | 1.148397 |
| 19               | 1                | 0              | 9.039635                | 7.849806 | 3.097060 |
| 20               | 6                | 0              | 6.403065                | 9.083131 | 3.673488 |
| 21               | 1                | 0              | 5.764591                | 9.604919 | 2.955139 |
| 22               | 1                | 0              | 5.838961                | 8.994116 | 4.606108 |
| 23               | 1                | 0              | 7.267484                | 9.718262 | 3.869518 |
| 24               | 6                | 0              | 4.488426                | 6.646371 | 2.859877 |
| 25               | 1                | 0              | 4.073090                | 6.445932 | 1.869613 |
| 26               | 1                | 0              | 4.148114                | 5.839379 | 3.512787 |
| 27               | 1                | 0              | 4.095276                | 7.592981 | 3.227289 |

**DFT wb97xd/6-31++G(d,p) optimised ground state structure:**

| Center<br>Number | Atomic<br>Number | Atomic<br>Type | Coordinates (Angstroms) |          |          |
|------------------|------------------|----------------|-------------------------|----------|----------|
|                  |                  |                | X                       | Y        | Z        |
| 1                | 5                | 0              | 6.150875                | 4.235723 | 1.927653 |
| 2                | 9                | 0              | 5.313234                | 4.405115 | 0.826052 |
| 3                | 9                | 0              | 5.464980                | 3.617751 | 2.974404 |
| 4                | 7                | 0              | 6.695760                | 5.626718 | 2.398045 |
| 5                | 7                | 0              | 7.394857                | 3.390295 | 1.533769 |
| 6                | 6                | 0              | 5.974159                | 6.673443 | 2.807852 |
| 7                | 6                | 0              | 6.839437                | 7.754127 | 3.156857 |
| 8                | 6                | 0              | 8.125678                | 7.309089 | 2.937894 |
| 9                | 6                | 0              | 8.043556                | 5.975005 | 2.460377 |
| 10               | 6                | 0              | 9.024825                | 5.082920 | 2.084169 |
| 11               | 6                | 0              | 8.715203                | 3.800320 | 1.623073 |
| 12               | 6                | 0              | 9.538037                | 2.743512 | 1.185612 |
| 13               | 6                | 0              | 8.695993                | 1.693744 | 0.832831 |
| 14               | 6                | 0              | 7.384196                | 2.135488 | 1.063564 |
| 15               | 1                | 0              | 10.065725               | 5.384507 | 2.144174 |
| 16               | 1                | 0              | 6.449426                | 1.613446 | 0.913958 |
| 17               | 1                | 0              | 8.977728                | 0.722672 | 0.453168 |
| 18               | 1                | 0              | 10.618339               | 2.766980 | 1.140157 |
| 19               | 1                | 0              | 9.044435                | 7.859714 | 3.093356 |
| 20               | 6                | 0              | 6.394628                | 9.093640 | 3.657486 |
| 21               | 1                | 0              | 5.744212                | 9.596889 | 2.934484 |
| 22               | 1                | 0              | 5.838161                | 9.006952 | 4.596847 |
| 23               | 1                | 0              | 7.255726                | 9.741045 | 3.839137 |
| 24               | 6                | 0              | 4.485493                | 6.653079 | 2.849235 |
| 25               | 1                | 0              | 4.080250                | 6.692577 | 1.833031 |
| 26               | 1                | 0              | 4.125619                | 5.727498 | 3.304422 |
| 27               | 1                | 0              | 4.104009                | 7.506983 | 3.411810 |

**DFT B3LYP/6-31G(d) optimised 1<sup>st</sup> excited-state structure:**

| Center Number | Atomic Number | Atomic Type | Coordinates (Angstroms) |          |          |
|---------------|---------------|-------------|-------------------------|----------|----------|
|               |               |             | X                       | Y        | Z        |
| 1             | 5             | 0           | 6.173647                | 4.222319 | 2.015757 |
| 2             | 9             | 0           | 5.257115                | 4.363699 | 0.983050 |
| 3             | 9             | 0           | 5.579068                | 3.649587 | 3.132955 |
| 4             | 7             | 0           | 6.713603                | 5.650147 | 2.422110 |
| 5             | 7             | 0           | 7.407907                | 3.420527 | 1.552707 |
| 6             | 6             | 0           | 5.915177                | 6.703951 | 2.830987 |
| 7             | 6             | 0           | 6.741991                | 7.765779 | 3.134207 |
| 8             | 6             | 0           | 8.143188                | 7.296528 | 2.880217 |
| 9             | 6             | 0           | 8.071483                | 6.012110 | 2.452619 |
| 10            | 6             | 0           | 9.109881                | 5.074823 | 2.052327 |
| 11            | 6             | 0           | 8.759504                | 3.822331 | 1.607578 |
| 12            | 6             | 0           | 9.549375                | 2.733749 | 1.118197 |
| 13            | 6             | 0           | 8.673612                | 1.711646 | 0.774785 |
| 14            | 6             | 0           | 7.369094                | 2.164831 | 1.052210 |
| 15            | 1             | 0           | 10.145465               | 5.386065 | 2.093280 |
| 16            | 1             | 0           | 6.424932                | 1.654806 | 0.920469 |
| 17            | 1             | 0           | 8.925936                | 0.741911 | 0.366718 |
| 18            | 1             | 0           | 10.627584               | 2.741051 | 1.033768 |
| 19            | 1             | 0           | 9.037482                | 7.891048 | 3.018109 |
| 20            | 6             | 0           | 6.397802                | 9.121714 | 3.621796 |
| 21            | 1             | 0           | 6.770227                | 9.894404 | 2.931154 |
| 22            | 1             | 0           | 5.320993                | 9.260072 | 3.742684 |
| 23            | 1             | 0           | 6.883566                | 9.327536 | 4.588440 |
| 24            | 6             | 0           | 4.425993                | 6.579294 | 2.901102 |
| 25            | 1             | 0           | 4.002747                | 6.358188 | 1.916016 |
| 26            | 1             | 0           | 4.136830                | 5.756716 | 3.563790 |
| 27            | 1             | 0           | 3.980338                | 7.504399 | 3.276383 |

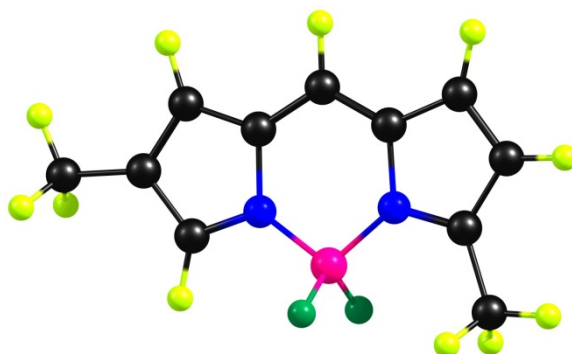

Figure S-15: DFT B3LYP/6-31G(d) optimised ground-state structure of **2.10**

**DFT B3LYP/6-31G(d) optimised ground state structure:**

| Center Number | Atomic Number | Atomic Type | Coordinates (Angstroms) |          |          |
|---------------|---------------|-------------|-------------------------|----------|----------|
|               |               |             | X                       | Y        | Z        |
| 1             | 5             | 0           | 6.130079                | 4.269819 | 1.867167 |
| 2             | 9             | 0           | 5.335006                | 4.482455 | 0.752272 |
| 3             | 9             | 0           | 5.418745                | 3.650694 | 2.882566 |
| 4             | 7             | 0           | 6.704731                | 5.638952 | 2.379148 |
| 5             | 7             | 0           | 7.380985                | 3.400556 | 1.478597 |
| 6             | 6             | 0           | 5.991744                | 6.686403 | 2.816147 |
| 7             | 6             | 0           | 6.841826                | 7.754041 | 3.199592 |
| 8             | 6             | 0           | 8.137737                | 7.302215 | 2.972243 |
| 9             | 6             | 0           | 8.051954                | 5.982322 | 2.460265 |
| 10            | 6             | 0           | 9.031575                | 5.073782 | 2.067027 |
| 11            | 6             | 0           | 8.711503                | 3.809809 | 1.586094 |
| 12            | 6             | 0           | 9.538347                | 2.746863 | 1.138574 |
| 13            | 6             | 0           | 8.697573                | 1.711010 | 0.767174 |
| 14            | 6             | 0           | 7.364817                | 2.145280 | 0.989114 |
| 15            | 1             | 0           | 10.076668               | 5.360208 | 2.137786 |

|    |   |   |           |          |          |
|----|---|---|-----------|----------|----------|
| 16 | 1 | 0 | 8.975808  | 0.740929 | 0.377474 |
| 17 | 1 | 0 | 10.619946 | 2.768638 | 1.104566 |
| 18 | 1 | 0 | 9.057335  | 7.846407 | 3.148577 |
| 19 | 6 | 0 | 6.405221  | 9.086068 | 3.736835 |
| 20 | 1 | 0 | 5.767712  | 9.622998 | 3.023467 |
| 21 | 1 | 0 | 5.832208  | 8.981450 | 4.666521 |
| 22 | 1 | 0 | 7.269831  | 9.721794 | 3.951122 |
| 23 | 1 | 0 | 4.910241  | 6.641899 | 2.841279 |
| 24 | 6 | 0 | 6.094122  | 1.399295 | 0.747789 |
| 25 | 1 | 0 | 5.522672  | 1.306522 | 1.677799 |
| 26 | 1 | 0 | 5.458388  | 1.945157 | 0.042129 |
| 27 | 1 | 0 | 6.300209  | 0.402407 | 0.350462 |

DFT B3LYP/6-31++G(d,p) optimised ground state structure:

| Center<br>Number | Atomic<br>Number | Atomic<br>Type | Coordinates (Angstroms) |          |          |
|------------------|------------------|----------------|-------------------------|----------|----------|
|                  |                  |                | X                       | Y        | Z        |
| 1                | 5                | 0              | 6.136676                | 4.278643 | 1.871057 |
| 2                | 9                | 0              | 5.324735                | 4.490885 | 0.754066 |
| 3                | 9                | 0              | 5.410179                | 3.656782 | 2.889613 |
| 4                | 7                | 0              | 6.704962                | 5.643748 | 2.381504 |
| 5                | 7                | 0              | 7.375332                | 3.402078 | 1.479129 |
| 6                | 6                | 0              | 5.992052                | 6.691206 | 2.819145 |
| 7                | 6                | 0              | 6.844765                | 7.754643 | 3.200397 |
| 8                | 6                | 0              | 8.139140                | 7.302156 | 2.971885 |
| 9                | 6                | 0              | 8.051117                | 5.983211 | 2.460244 |
| 10               | 6                | 0              | 9.027935                | 5.075060 | 2.066461 |
| 11               | 6                | 0              | 8.704789                | 3.813727 | 1.586729 |
| 12               | 6                | 0              | 9.530773                | 2.752589 | 1.139221 |
| 13               | 6                | 0              | 8.691957                | 1.716517 | 0.768103 |
| 14               | 6                | 0              | 7.359331                | 2.146747 | 0.989455 |
| 15               | 1                | 0              | 10.071607               | 5.358453 | 2.135400 |
| 16               | 1                | 0              | 8.971952                | 0.749568 | 0.379225 |
| 17               | 1                | 0              | 10.609761               | 2.775156 | 1.104871 |
| 18               | 1                | 0              | 9.058201                | 7.842749 | 3.146272 |
| 19               | 6                | 0              | 6.410129                | 9.085820 | 3.737697 |
| 20               | 1                | 0              | 5.774681                | 9.619533 | 3.024369 |
| 21               | 1                | 0              | 5.839777                | 8.978418 | 4.665403 |
| 22               | 1                | 0              | 7.273703                | 9.718750 | 3.950708 |
| 23               | 1                | 0              | 4.912574                | 6.649529 | 2.846052 |
| 24               | 6                | 0              | 6.099656                | 1.388901 | 0.743848 |
| 25               | 1                | 0              | 5.526326                | 1.283255 | 1.668685 |
| 26               | 1                | 0              | 5.460929                | 1.921629 | 0.034326 |
| 27               | 1                | 0              | 6.323947                | 0.398218 | 0.347917 |

DFT mpw1pw91/6-31++G(d,p) optimised ground state structure:

| Center<br>Number | Atomic<br>Number | Atomic<br>Type | Coordinates (Angstroms) |          |          |
|------------------|------------------|----------------|-------------------------|----------|----------|
|                  |                  |                | X                       | Y        | Z        |
| 1                | 5                | 0              | 6.142899                | 4.279251 | 1.870608 |
| 2                | 9                | 0              | 5.336674                | 4.491083 | 0.757864 |
| 3                | 9                | 0              | 5.421173                | 3.660326 | 2.885096 |
| 4                | 7                | 0              | 6.709816                | 5.638883 | 2.379095 |
| 5                | 7                | 0              | 7.377893                | 3.408313 | 1.481439 |
| 6                | 6                | 0              | 5.997871                | 6.679974 | 2.814063 |
| 7                | 6                | 0              | 6.845055                | 7.742351 | 3.195452 |
| 8                | 6                | 0              | 8.136277                | 7.292406 | 2.968437 |
| 9                | 6                | 0              | 8.047859                | 5.977988 | 2.458452 |
| 10               | 6                | 0              | 9.023643                | 5.073432 | 2.066534 |
| 11               | 6                | 0              | 8.699803                | 3.815859 | 1.588243 |
| 12               | 6                | 0              | 9.523977                | 2.758458 | 1.142661 |
| 13               | 6                | 0              | 8.686506                | 1.726248 | 0.772737 |
| 14               | 6                | 0              | 7.359142                | 2.159073 | 0.994333 |
| 15               | 1                | 0              | 10.066748               | 5.356682 | 2.135821 |
| 16               | 1                | 0              | 8.964068                | 0.758951 | 0.384000 |



|    |   |   |           |          |          |
|----|---|---|-----------|----------|----------|
| 17 | 1 | 0 | 10.602626 | 2.780957 | 1.108706 |
| 18 | 1 | 0 | 9.054775  | 7.833115 | 3.143203 |
| 19 | 6 | 0 | 6.409440  | 9.066489 | 3.729889 |
| 20 | 1 | 0 | 5.775570  | 9.598479 | 3.015619 |
| 21 | 1 | 0 | 5.837878  | 8.957194 | 4.655272 |
| 22 | 1 | 0 | 7.270828  | 9.699811 | 3.944836 |
| 23 | 1 | 0 | 4.918706  | 6.635398 | 2.839510 |
| 24 | 6 | 0 | 6.101634  | 1.410342 | 0.751773 |
| 25 | 1 | 0 | 5.530744  | 1.309749 | 1.677519 |
| 26 | 1 | 0 | 5.465843  | 1.947717 | 0.044645 |
| 27 | 1 | 0 | 6.319537  | 0.419439 | 0.355975 |

DFT wb97xd/6-31++G(d,p) optimised ground state structure:

| Center<br>Number | Atomic<br>Number | Atomic<br>Type | Coordinates (Angstroms) |          |           |
|------------------|------------------|----------------|-------------------------|----------|-----------|
|                  |                  |                | X                       | Y        | Z         |
| 1                | 5                | 0              | 6.142455                | 4.270698 | 1.892163  |
| 2                | 9                | 0              | 5.311992                | 4.471898 | 0.790646  |
| 3                | 9                | 0              | 5.443129                | 3.649160 | 2.927092  |
| 4                | 7                | 0              | 6.709361                | 5.636419 | 2.385650  |
| 5                | 7                | 0              | 7.378037                | 3.405712 | 1.483417  |
| 6                | 6                | 0              | 5.996601                | 6.676295 | 2.827301  |
| 7                | 6                | 0              | 6.843519                | 7.742410 | 3.201484  |
| 8                | 6                | 0              | 8.137079                | 7.297934 | 2.964436  |
| 9                | 6                | 0              | 8.050203                | 5.982266 | 2.454838  |
| 10               | 6                | 0              | 9.027938                | 5.077973 | 2.055494  |
| 11               | 6                | 0              | 8.704568                | 3.817972 | 1.579058  |
| 12               | 6                | 0              | 9.527754                | 2.760969 | 1.124052  |
| 13               | 6                | 0              | 8.687959                | 1.726170 | 0.760300  |
| 14               | 6                | 0              | 7.359729                | 2.157756 | 0.994627  |
| 15               | 1                | 0              | 10.072626               | 5.365857 | 2.116843  |
| 16               | 1                | 0              | 8.964085                | 0.757800 | 0.367766  |
| 17               | 1                | 0              | 10.608130               | 2.784610 | 1.080260  |
| 18               | 1                | 0              | 9.055130                | 7.845322 | 3.134278  |
| 19               | 6                | 0              | 6.406076                | 9.073513 | 3.733883  |
| 20               | 1                | 0              | 5.876379                | 9.654763 | 2.972095  |
| 21               | 1                | 0              | 5.733875                | 8.960241 | 4.589900  |
| 22               | 1                | 0              | 7.268874                | 9.659068 | 4.060607  |
| 23               | 1                | 0              | 4.916167                | 6.626892 | 2.863807  |
| 24               | 6                | 0              | 6.096176                | 1.407599 | 0.748733  |
| 25               | 1                | 0              | 5.461688                | 1.417844 | 1.638592  |
| 26               | 1                | 0              | 5.527964                | 1.875716 | -0.060630 |
| 27               | 1                | 0              | 6.319491                | 0.375115 | 0.475091  |

| Center<br>Number | Atomic<br>Number | Atomic<br>Type | Coordinates (Angstroms) |          |          |
|------------------|------------------|----------------|-------------------------|----------|----------|
|                  |                  |                | X                       | Y        | Z        |
| 1                | 5                | 0              | 6.172072                | 4.249366 | 1.918823 |
| 2                | 9                | 0              | 5.308064                | 4.472470 | 0.854060 |
| 3                | 9                | 0              | 5.501224                | 3.659368 | 2.982757 |
| 4                | 7                | 0              | 6.729633                | 5.642827 | 2.400037 |
| 5                | 7                | 0              | 7.405032                | 3.425636 | 1.492344 |
| 6                | 6                | 0              | 5.941409                | 6.670596 | 2.852565 |
| 7                | 6                | 0              | 6.743617                | 7.732625 | 3.192212 |
| 8                | 6                | 0              | 8.149706                | 7.282508 | 2.909003 |
| 9                | 6                | 0              | 8.082308                | 6.014679 | 2.432978 |
| 10               | 6                | 0              | 9.116532                | 5.081609 | 1.992945 |
| 11               | 6                | 0              | 8.755262                | 3.837555 | 1.541994 |
| 12               | 6                | 0              | 9.551145                | 2.748460 | 1.055672 |
| 13               | 6                | 0              | 8.680973                | 1.721821 | 0.728779 |
| 14               | 6                | 0              | 7.362463                | 2.156923 | 1.004747 |
| 15               | 1                | 0              | 10.154108               | 5.386043 | 2.026870 |
| 16               | 1                | 0              | 8.935000                | 0.747691 | 0.330801 |
| 17               | 1                | 0              | 10.629343               | 2.760786 | 0.972109 |
| 18               | 1                | 0              | 9.040842                | 7.877388 | 3.063226 |
| 19               | 6                | 0              | 6.362602                | 9.059557 | 3.727095 |
| 20               | 1                | 0              | 6.711652                | 9.867245 | 3.065171 |

|    |   |   |          |          |          |
|----|---|---|----------|----------|----------|
| 21 | 1 | 0 | 5.280674 | 9.155167 | 3.849282 |
| 22 | 1 | 0 | 6.841349 | 9.245078 | 4.701117 |
| 23 | 1 | 0 | 4.868493 | 6.561928 | 2.896887 |
| 24 | 6 | 0 | 6.080745 | 1.417374 | 0.824454 |
| 25 | 1 | 0 | 5.545942 | 1.327105 | 1.778089 |
| 26 | 1 | 0 | 5.410857 | 1.958464 | 0.144849 |
| 27 | 1 | 0 | 6.265935 | 0.417700 | 0.422919 |

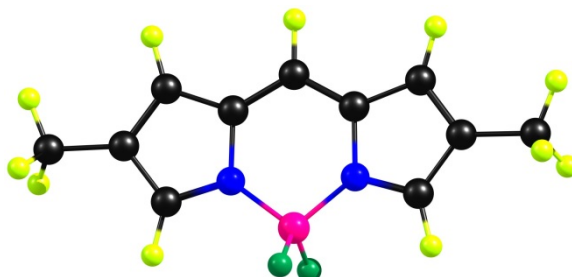

Figure S-16: DFT B3LYP/6-31G(d) optimised ground-state structure of **2.11**

**DFT B3LYP/6-31G(d) optimised ground state structure:**

| Center Number | Atomic Number | Atomic Type | Coordinates (Angstroms) |           |           |
|---------------|---------------|-------------|-------------------------|-----------|-----------|
|               |               |             | X                       | Y         | Z         |
| 1             | 5             | 0           | 6.142551                | 4.219685  | 1.993371  |
| 2             | 9             | 0           | 5.232416                | 4.365455  | 0.965199  |
| 3             | 9             | 0           | 5.582122                | 3.589773  | 3.088690  |
| 4             | 7             | 0           | 6.705503                | 5.626160  | 2.419337  |
| 5             | 7             | 0           | 7.394144                | 3.406238  | 1.495020  |
| 6             | 6             | 0           | 5.990059                | 6.680699  | 2.830340  |
| 7             | 6             | 0           | 6.836964                | 7.758688  | 3.196066  |
| 8             | 6             | 0           | 8.133906                | 7.304509  | 2.985601  |
| 9             | 6             | 0           | 8.052870                | 5.973690  | 2.498675  |
| 10            | 6             | 0           | 9.036115                | 5.073105  | 2.099509  |
| 11            | 6             | 0           | 8.723233                | 3.812690  | 1.598891  |
| 12            | 6             | 0           | 9.541399                | 2.767292  | 1.096407  |
| 13            | 6             | 0           | 8.705834                | 1.734173  | 0.687595  |
| 14            | 6             | 0           | 7.386112                | 2.180362  | 0.956506  |
| 15            | 1             | 0           | 10.078971               | 5.368856  | 2.166160  |
| 16            | 1             | 0           | 10.622784               | 2.790601  | 1.041175  |
| 17            | 1             | 0           | 9.051514                | 7.855770  | 3.150205  |
| 18            | 6             | 0           | 6.393880                | 9.102055  | 3.698165  |
| 19            | 1             | 0           | 5.767790                | 9.623847  | 2.963752  |
| 20            | 1             | 0           | 5.806396                | 9.017131  | 4.620740  |
| 21            | 1             | 0           | 7.255744                | 9.741474  | 3.912187  |
| 22            | 1             | 0           | 4.908414                | 6.635004  | 2.851584  |
| 23            | 1             | 0           | 6.450429                | 1.664145  | 0.781830  |
| 24            | 6             | 0           | 9.088552                | 0.415468  | 0.081292  |
| 25            | 1             | 0           | 8.736698                | -0.427886 | 0.688292  |
| 26            | 1             | 0           | 8.662590                | 0.290855  | -0.922025 |
| 27            | 1             | 0           | 10.175763               | 0.328567  | -0.007550 |

**DFT B3LYP/6-31++G(d,p) optimised ground state structure:**

| Center Number | Atomic Number | Atomic Type | Coordinates (Angstroms) |          |          |
|---------------|---------------|-------------|-------------------------|----------|----------|
|               |               |             | X                       | Y        | Z        |
| 1             | 5             | 0           | 6.145321                | 4.260723 | 1.896996 |
| 2             | 9             | 0           | 5.308161                | 4.457779 | 0.800085 |
| 3             | 9             | 0           | 5.463183                | 3.619236 | 2.929497 |
| 4             | 7             | 0           | 6.706004                | 5.636114 | 2.397792 |

|    |   |   |           |           |           |
|----|---|---|-----------|-----------|-----------|
| 5  | 7 | 0 | 7.394971  | 3.414902  | 1.472941  |
| 6  | 6 | 0 | 5.992238  | 6.671702  | 2.857577  |
| 7  | 6 | 0 | 6.840288  | 7.747195  | 3.219331  |
| 8  | 6 | 0 | 8.133230  | 7.313959  | 2.954564  |
| 9  | 6 | 0 | 8.050269  | 5.994206  | 2.440904  |
| 10 | 6 | 0 | 9.031596  | 5.105053  | 2.019299  |
| 11 | 6 | 0 | 8.719242  | 3.837451  | 1.542889  |
| 12 | 6 | 0 | 9.539006  | 2.781776  | 1.067480  |
| 13 | 6 | 0 | 8.707583  | 1.727086  | 0.712712  |
| 14 | 6 | 0 | 7.388948  | 2.168748  | 0.982664  |
| 15 | 1 | 0 | 10.070896 | 5.409084  | 2.063332  |
| 16 | 1 | 0 | 10.617014 | 2.811933  | 1.000849  |
| 17 | 1 | 0 | 9.049034  | 7.867061  | 3.105672  |
| 18 | 6 | 0 | 6.400044  | 9.069896  | 3.772263  |
| 19 | 1 | 0 | 5.737214  | 9.595158  | 3.077875  |
| 20 | 1 | 0 | 5.856471  | 8.950704  | 4.714463  |
| 21 | 1 | 0 | 7.259100  | 9.715548  | 3.963908  |
| 22 | 1 | 0 | 4.914427  | 6.615384  | 2.913893  |
| 23 | 1 | 0 | 6.458431  | 1.637559  | 0.841258  |
| 24 | 6 | 0 | 9.092868  | 0.388302  | 0.157464  |
| 25 | 1 | 0 | 8.765117  | -0.426745 | 0.809918  |
| 26 | 1 | 0 | 8.645893  | 0.217704  | -0.826674 |
| 27 | 1 | 0 | 10.176201 | 0.310889  | 0.048062  |

DFT mpw1pw91/6-31++G(d,p) optimised ground state structure:

| Center Number | Atomic Number | Atomic Type | Coordinates (Angstroms) |           |           |
|---------------|---------------|-------------|-------------------------|-----------|-----------|
|               |               |             | X                       | Y         | Z         |
| 1             | 5             | 0           | 6.152597                | 4.263390  | 1.895991  |
| 2             | 9             | 0           | 5.321911                | 4.460815  | 0.802830  |
| 3             | 9             | 0           | 5.474243                | 3.625089  | 2.923825  |
| 4             | 7             | 0           | 6.712459                | 5.632648  | 2.395315  |
| 5             | 7             | 0           | 7.398269                | 3.421632  | 1.474819  |
| 6             | 6             | 0           | 5.999968                | 6.662084  | 2.852483  |
| 7             | 6             | 0           | 6.842872                | 7.736030  | 3.214901  |
| 8             | 6             | 0           | 8.132534                | 7.304812  | 2.951833  |
| 9             | 6             | 0           | 8.048634                | 5.989682  | 2.439568  |
| 10            | 6             | 0           | 9.028508                | 5.103858  | 2.019889  |
| 11            | 6             | 0           | 8.715384                | 3.840106  | 1.544655  |
| 12            | 6             | 0           | 9.533415                | 2.788496  | 1.071403  |
| 13            | 6             | 0           | 8.703459                | 1.737689  | 0.717347  |
| 14            | 6             | 0           | 7.389802                | 2.181383  | 0.986866  |
| 15            | 1             | 0           | 10.067317               | 5.407474  | 2.064558  |
| 16            | 1             | 0           | 10.611117               | 2.818331  | 1.005431  |
| 17            | 1             | 0           | 9.048044                | 7.857536  | 3.103560  |
| 18            | 6             | 0           | 6.402049                | 9.051645  | 3.765327  |
| 19            | 1             | 0           | 5.739359                | 9.574683  | 3.070938  |
| 20            | 1             | 0           | 5.858866                | 8.930566  | 4.706181  |
| 21            | 1             | 0           | 7.258947                | 9.698161  | 3.957366  |
| 22            | 1             | 0           | 4.922453                | 6.603180  | 2.907035  |
| 23            | 1             | 0           | 6.457920                | 1.652977  | 0.845918  |
| 24            | 6             | 0           | 9.084292                | 0.404369  | 0.164751  |
| 25            | 1             | 0           | 8.755742                | -0.408550 | 0.817540  |
| 26            | 1             | 0           | 8.636298                | 0.235133  | -0.817880 |
| 27            | 1             | 0           | 10.166292               | 0.325187  | 0.054566  |

DFT wb97xd/6-31++G(d,p) optimised ground state structure:

| Center Number | Atomic Number | Atomic Type | Coordinates (Angstroms) |          |          |
|---------------|---------------|-------------|-------------------------|----------|----------|
|               |               |             | X                       | Y        | Z        |
| 1             | 5             | 0           | 6.152429                | 4.262302 | 1.898400 |
| 2             | 9             | 0           | 5.317891                | 4.459774 | 0.802422 |
| 3             | 9             | 0           | 5.473894                | 3.621968 | 2.930731 |
| 4             | 7             | 0           | 6.712765                | 5.633082 | 2.396213 |
| 5             | 7             | 0           | 7.398968                | 3.420986 | 1.475126 |

|    |   |   |           |           |           |
|----|---|---|-----------|-----------|-----------|
| 6  | 6 | 0 | 6.000380  | 6.657995  | 2.866729  |
| 7  | 6 | 0 | 6.842550  | 7.737631  | 3.219718  |
| 8  | 6 | 0 | 8.133062  | 7.316343  | 2.936763  |
| 9  | 6 | 0 | 8.050968  | 6.000256  | 2.421985  |
| 10 | 6 | 0 | 9.031468  | 5.116377  | 1.992100  |
| 11 | 6 | 0 | 8.718987  | 3.846779  | 1.525305  |
| 12 | 6 | 0 | 9.536503  | 2.792101  | 1.052927  |
| 13 | 6 | 0 | 8.705056  | 1.733513  | 0.719679  |
| 14 | 6 | 0 | 7.391145  | 2.174618  | 0.999908  |
| 15 | 1 | 0 | 10.071413 | 5.425932  | 2.023421  |
| 16 | 1 | 0 | 10.615582 | 2.823673  | 0.975340  |
| 17 | 1 | 0 | 9.048209  | 7.876378  | 3.079220  |
| 18 | 6 | 0 | 6.397009  | 9.055025  | 3.778032  |
| 19 | 1 | 0 | 5.808377  | 9.620281  | 3.048205  |
| 20 | 1 | 0 | 5.776788  | 8.920059  | 4.669524  |
| 21 | 1 | 0 | 7.257246  | 9.667232  | 4.059501  |
| 22 | 1 | 0 | 4.922583  | 6.589867  | 2.938229  |
| 23 | 1 | 0 | 6.457983  | 1.640232  | 0.877265  |
| 24 | 6 | 0 | 9.084417  | 0.391690  | 0.170728  |
| 25 | 1 | 0 | 8.673677  | -0.418503 | 0.781078  |
| 26 | 1 | 0 | 8.712711  | 0.257568  | -0.850299 |
| 27 | 1 | 0 | 10.170690 | 0.275245  | 0.148767  |

DFT B3LYP/6-31G(d) optimised 1<sup>st</sup> excited-state structure:

| Center<br>Number | Atomic<br>Number | Atomic<br>Type | Coordinates (Angstroms) |           |           |
|------------------|------------------|----------------|-------------------------|-----------|-----------|
|                  |                  |                | X                       | Y         | Z         |
| 1                | 5                | 0              | 6.260496                | 4.100718  | 2.387697  |
| 2                | 9                | 0              | 5.125114                | 4.044654  | 1.601351  |
| 3                | 9                | 0              | 6.062630                | 3.491971  | 3.617681  |
| 4                | 7                | 0              | 6.768256                | 5.550465  | 2.535496  |
| 5                | 7                | 0              | 7.439604                | 3.353764  | 1.657804  |
| 6                | 6                | 0              | 6.010116                | 6.629859  | 2.820755  |
| 7                | 6                | 0              | 6.823836                | 7.751420  | 3.108244  |
| 8                | 6                | 0              | 8.143653                | 7.321395  | 2.991409  |
| 9                | 6                | 0              | 8.124496                | 5.943050  | 2.611750  |
| 10               | 6                | 0              | 9.130415                | 5.067702  | 2.276806  |
| 11               | 6                | 0              | 8.779280                | 3.768958  | 1.705860  |
| 12               | 6                | 0              | 9.524132                | 2.828378  | 1.071267  |
| 13               | 6                | 0              | 8.586252                | 1.760124  | 0.591371  |
| 14               | 6                | 0              | 7.331598                | 2.169003  | 0.977521  |
| 15               | 1                | 0              | 10.171294               | 5.357038  | 2.335810  |
| 16               | 1                | 0              | 10.595493               | 2.836982  | 0.915860  |
| 17               | 1                | 0              | 9.039140                | 7.915762  | 3.119021  |
| 18               | 6                | 0              | 6.329009                | 9.127180  | 3.443022  |
| 19               | 1                | 0              | 6.282525                | 9.768395  | 2.552301  |
| 20               | 1                | 0              | 5.322523                | 9.096063  | 3.873844  |
| 21               | 1                | 0              | 6.988614                | 9.621988  | 4.164185  |
| 22               | 1                | 0              | 4.930877                | 6.555759  | 2.832293  |
| 23               | 1                | 0              | 6.369158                | 1.698648  | 0.844951  |
| 24               | 6                | 0              | 8.987075                | 0.529924  | -0.129854 |
| 25               | 1                | 0              | 8.125274                | -0.092707 | -0.383567 |
| 26               | 1                | 0              | 9.526790                | 0.774100  | -1.057887 |
| 27               | 1                | 0              | 9.685098                | -0.072187 | 0.472025  |

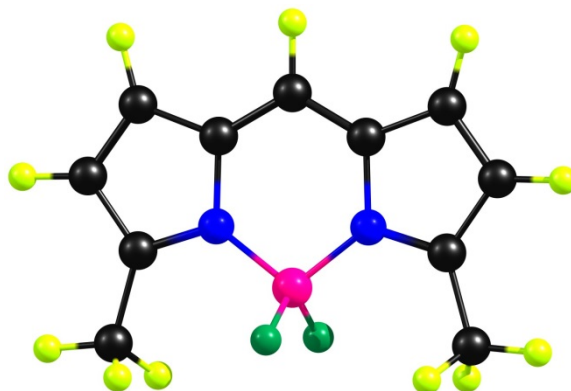

Figure S-17: DFT B3LYP/6-31G(d) optimised ground-state structure of **2.12**

**DFT B3LYP/6-31G(d) optimised ground state structure:**

| Center Number | Atomic Number | Atomic Type | Coordinates (Angstroms) |          |          |
|---------------|---------------|-------------|-------------------------|----------|----------|
|               |               |             | X                       | Y        | Z        |
| 1             | 5             | 0           | 6.128107                | 4.267794 | 1.868031 |
| 2             | 9             | 0           | 5.334564                | 4.487945 | 0.748398 |
| 3             | 9             | 0           | 5.407901                | 3.626729 | 2.869072 |
| 4             | 7             | 0           | 6.686885                | 5.633022 | 2.403132 |
| 5             | 7             | 0           | 7.378937                | 3.405750 | 1.474691 |
| 6             | 6             | 0           | 5.960543                | 6.676943 | 2.852184 |
| 7             | 6             | 0           | 6.835668                | 7.720822 | 3.245839 |
| 8             | 6             | 0           | 8.131406                | 7.282635 | 3.023084 |
| 9             | 6             | 0           | 8.037735                | 5.970616 | 2.493513 |
| 10            | 6             | 0           | 9.021858                | 5.072438 | 2.094722 |
| 11            | 6             | 0           | 8.708036                | 3.813350 | 1.594253 |
| 12            | 6             | 0           | 9.537299                | 2.757967 | 1.136973 |
| 13            | 6             | 0           | 8.698303                | 1.726193 | 0.746981 |
| 14            | 6             | 0           | 7.365259                | 2.156061 | 0.967661 |
| 15            | 1             | 0           | 10.065079               | 5.362518 | 2.176445 |
| 16            | 1             | 0           | 10.619050               | 2.780512 | 1.108716 |
| 17            | 1             | 0           | 9.053994                | 7.817421 | 3.208360 |
| 18            | 1             | 0           | 8.979369                | 0.761696 | 0.345571 |
| 19            | 1             | 0           | 6.520323                | 8.675792 | 3.644554 |
| 20            | 6             | 0           | 6.096870                | 1.411295 | 0.709071 |
| 21            | 1             | 0           | 5.520255                | 1.303310 | 1.634170 |
| 22            | 1             | 0           | 5.463977                | 1.964299 | 0.006513 |
| 23            | 1             | 0           | 6.308181                | 0.420453 | 0.299385 |
| 24            | 6             | 0           | 4.467881                | 6.653968 | 2.894473 |
| 25            | 1             | 0           | 4.058451                | 6.487755 | 1.892127 |
| 26            | 1             | 0           | 4.114735                | 5.826797 | 3.519797 |
| 27            | 1             | 0           | 4.078808                | 7.595388 | 3.290216 |

**DFT B3LYP/6-31++G(d,p) optimised ground state structure:**

| Center Number | Atomic Number | Atomic Type | Coordinates (Angstroms) |          |          |
|---------------|---------------|-------------|-------------------------|----------|----------|
|               |               |             | X                       | Y        | Z        |
| 1             | 5             | 0           | 6.134065                | 4.269292 | 1.868856 |
| 2             | 9             | 0           | 5.325936                | 4.486207 | 0.746097 |
| 3             | 9             | 0           | 5.400408                | 3.623379 | 2.871481 |
| 4             | 7             | 0           | 6.682136                | 5.633732 | 2.403564 |
| 5             | 7             | 0           | 7.375367                | 3.402742 | 1.473574 |
| 6             | 6             | 0           | 5.957421                | 6.678790 | 2.853208 |
| 7             | 6             | 0           | 6.836131                | 7.718523 | 3.244501 |
| 8             | 6             | 0           | 8.129644                | 7.277776 | 3.020247 |
| 9             | 6             | 0           | 8.033515                | 5.967595 | 2.491740 |
| 10            | 6             | 0           | 9.016409                | 5.071303 | 2.093433 |

|    |   |   |           |          |           |
|----|---|---|-----------|----------|-----------|
| 11 | 6 | 0 | 8.702631  | 3.814213 | 1.594099  |
| 12 | 6 | 0 | 9.532885  | 2.761801 | 1.137761  |
| 13 | 6 | 0 | 8.697354  | 1.728650 | 0.747621  |
| 14 | 6 | 0 | 7.363772  | 2.152810 | 0.966552  |
| 15 | 1 | 0 | 10.057405 | 5.360960 | 2.174539  |
| 16 | 1 | 0 | 10.612011 | 2.786504 | 1.109972  |
| 17 | 1 | 0 | 9.051147  | 7.809748 | 3.203915  |
| 18 | 1 | 0 | 8.981738  | 0.767564 | 0.347489  |
| 19 | 1 | 0 | 6.525510  | 8.672311 | 3.642582  |
| 20 | 6 | 0 | 6.107290  | 1.394941 | 0.702913  |
| 21 | 1 | 0 | 5.528570  | 1.274263 | 1.622416  |
| 22 | 1 | 0 | 5.471611  | 1.934489 | -0.004030 |
| 23 | 1 | 0 | 6.337750  | 0.410407 | 0.295187  |
| 24 | 6 | 0 | 4.467417  | 6.672454 | 2.902848  |
| 25 | 1 | 0 | 4.048156  | 6.515499 | 1.905575  |
| 26 | 1 | 0 | 4.105147  | 5.855197 | 3.531989  |
| 27 | 1 | 0 | 4.098050  | 7.618317 | 3.299798  |

DFT mpw1pw91/6-31++G(d,p) optimised ground state structure:

| Center Number | Atomic Number | Atomic Type | Coordinates (Angstroms) |          |          |
|---------------|---------------|-------------|-------------------------|----------|----------|
|               |               |             | X                       | Y        | Z        |
| 1             | 5             | 0           | 6.138111                | 4.270471 | 1.869028 |
| 2             | 9             | 0           | 5.335861                | 4.487473 | 0.750550 |
| 3             | 9             | 0           | 5.409103                | 3.627620 | 2.867596 |
| 4             | 7             | 0           | 6.685950                | 5.628554 | 2.401642 |
| 5             | 7             | 0           | 7.375689                | 3.408902 | 1.476276 |
| 6             | 6             | 0           | 5.962194                | 6.667039 | 2.848279 |
| 7             | 6             | 0           | 6.834884                | 7.706281 | 3.239515 |
| 8             | 6             | 0           | 8.125235                | 7.268183 | 3.016650 |
| 9             | 6             | 0           | 8.028775                | 5.962095 | 2.490064 |
| 10            | 6             | 0           | 9.010493                | 5.069520 | 2.093301 |
| 11            | 6             | 0           | 8.695613                | 3.816163 | 1.595491 |
| 12            | 6             | 0           | 9.523718                | 2.767449 | 1.140635 |
| 13            | 6             | 0           | 8.689262                | 1.738281 | 0.751910 |
| 14            | 6             | 0           | 7.361044                | 2.165147 | 0.971682 |
| 15            | 1             | 0           | 10.050939               | 5.359028 | 2.174483 |
| 16            | 1             | 0           | 10.602498               | 2.791989 | 1.112903 |
| 17            | 1             | 0           | 9.046400                | 7.800021 | 3.200337 |
| 18            | 1             | 0           | 8.970905                | 0.776842 | 0.351667 |
| 19            | 1             | 0           | 6.521746                | 8.659032 | 3.637124 |
| 20            | 6             | 0           | 6.106628                | 1.416410 | 0.711440 |
| 21            | 1             | 0           | 5.530013                | 1.301312 | 1.631813 |
| 22            | 1             | 0           | 5.474060                | 1.960035 | 0.006331 |
| 23            | 1             | 0           | 6.330673                | 0.431337 | 0.304475 |
| 24            | 6             | 0           | 4.479106                | 6.654197 | 2.894888 |
| 25            | 1             | 0           | 4.064807                | 6.495062 | 1.896952 |
| 26            | 1             | 0           | 4.121606                | 5.834262 | 3.521565 |
| 27            | 1             | 0           | 4.104163                | 7.596765 | 3.291333 |

DFT wb97xd/6-31++G(d,p) optimised ground state structure:

| Center Number | Atomic Number | Atomic Type | Coordinates (Angstroms) |          |          |
|---------------|---------------|-------------|-------------------------|----------|----------|
|               |               |             | X                       | Y        | Z        |
| 1             | 5             | 0           | 6.137301                | 4.269879 | 1.869874 |
| 2             | 9             | 0           | 5.331687                | 4.486928 | 0.748626 |
| 3             | 9             | 0           | 5.409227                | 3.625063 | 2.874097 |
| 4             | 7             | 0           | 6.685830                | 5.629974 | 2.401654 |
| 5             | 7             | 0           | 7.376263                | 3.407942 | 1.475445 |
| 6             | 6             | 0           | 5.962886                | 6.668507 | 2.849449 |
| 7             | 6             | 0           | 6.834836                | 7.710529 | 3.241796 |
| 8             | 6             | 0           | 8.127928                | 7.273278 | 3.017900 |
| 9             | 6             | 0           | 8.032782                | 5.965983 | 2.490116 |
| 10            | 6             | 0           | 9.015357                | 5.071429 | 2.092325 |
| 11            | 6             | 0           | 8.700884                | 3.815819 | 1.593862 |

|    |   |   |           |          |           |
|----|---|---|-----------|----------|-----------|
| 12 | 6 | 0 | 9.528738  | 2.765044 | 1.138712  |
| 13 | 6 | 0 | 8.691774  | 1.734341 | 0.750710  |
| 14 | 6 | 0 | 7.362590  | 2.163829 | 0.971745  |
| 15 | 1 | 0 | 10.058066 | 5.361683 | 2.173261  |
| 16 | 1 | 0 | 10.609577 | 2.789016 | 1.110408  |
| 17 | 1 | 0 | 9.050424  | 7.806845 | 3.202011  |
| 18 | 1 | 0 | 8.971959  | 0.770272 | 0.350393  |
| 19 | 1 | 0 | 6.519164  | 8.664107 | 3.640827  |
| 20 | 6 | 0 | 6.100249  | 1.415323 | 0.711552  |
| 21 | 1 | 0 | 5.515374  | 1.321018 | 1.630494  |
| 22 | 1 | 0 | 5.480938  | 1.950818 | -0.013371 |
| 23 | 1 | 0 | 6.324395  | 0.419755 | 0.324981  |
| 24 | 6 | 0 | 4.473196  | 6.651679 | 2.894242  |
| 25 | 1 | 0 | 4.062172  | 6.516827 | 1.889907  |
| 26 | 1 | 0 | 4.118483  | 5.816655 | 3.504438  |
| 27 | 1 | 0 | 4.097395  | 7.586926 | 3.312477  |

DFT B3LYP/6-31G(d) optimised 1<sup>st</sup> excited-state structure:

| Center<br>Number | Atomic<br>Number | Atomic<br>Type | Coordinates (Angstroms) |          |          |
|------------------|------------------|----------------|-------------------------|----------|----------|
|                  |                  |                | X                       | Y        | Z        |
| 1                | 5                | 0              | 6.139876                | 4.271409 | 1.868173 |
| 2                | 9                | 0              | 5.332601                | 4.486972 | 0.749313 |
| 3                | 9                | 0              | 5.404002                | 3.627230 | 2.864921 |
| 4                | 7                | 0              | 6.699203                | 5.620414 | 2.397488 |
| 5                | 7                | 0              | 7.382046                | 3.422712 | 1.481383 |
| 6                | 6                | 0              | 5.953925                | 6.655850 | 2.843472 |
| 7                | 6                | 0              | 6.825019                | 7.707804 | 3.241916 |
| 8                | 6                | 0              | 8.141761                | 7.284669 | 3.026071 |
| 9                | 6                | 0              | 8.068123                | 5.979270 | 2.497655 |
| 10               | 6                | 0              | 9.081905                | 5.088312 | 2.101436 |
| 11               | 6                | 0              | 8.738873                | 3.820525 | 1.597574 |
| 12               | 6                | 0              | 9.547608                | 2.760045 | 1.139515 |
| 13               | 6                | 0              | 8.681972                | 1.731002 | 0.750436 |
| 14               | 6                | 0              | 7.347453                | 2.170617 | 0.973886 |
| 15               | 1                | 0              | 10.122347               | 5.377259 | 2.183808 |
| 16               | 1                | 0              | 10.628529               | 2.765469 | 1.105576 |
| 17               | 1                | 0              | 9.054148                | 7.832505 | 3.218428 |
| 18               | 1                | 0              | 8.954020                | 0.763419 | 0.348046 |
| 19               | 1                | 0              | 6.500328                | 8.660782 | 3.640102 |
| 20               | 6                | 0              | 6.072895                | 1.444768 | 0.721511 |
| 21               | 1                | 0              | 5.492394                | 1.348528 | 1.648505 |
| 22               | 1                | 0              | 5.438456                | 2.007832 | 0.024367 |
| 23               | 1                | 0              | 6.266637                | 0.450325 | 0.311395 |
| 24               | 6                | 0              | 4.466550                | 6.614985 | 2.876479 |
| 25               | 1                | 0              | 4.061908                | 6.438405 | 1.871172 |
| 26               | 1                | 0              | 4.116188                | 5.778091 | 3.494888 |
| 27               | 1                | 0              | 4.060710                | 7.550269 | 3.270415 |

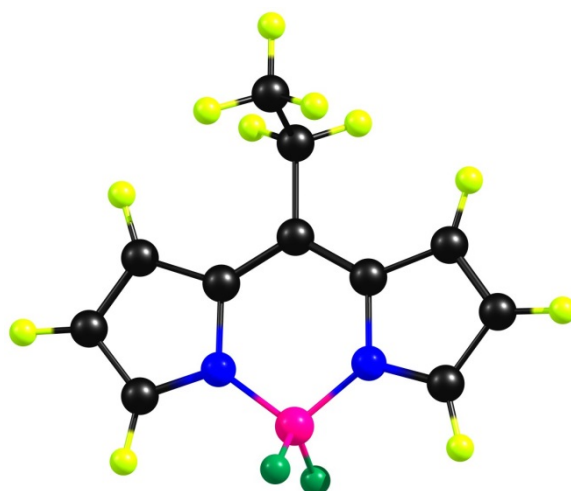

Figure S-18: DFT B3LYP/6-31G(d) optimised ground-state structure of **3.01**

**DFT B3LYP/6-31G(d) optimised ground state structure:**

| Center Number | Atomic Number | Atomic Type | Coordinates (Angstroms) |          |          |
|---------------|---------------|-------------|-------------------------|----------|----------|
|               |               |             | X                       | Y        | Z        |
| 1             | 5             | 0           | 6.117317                | 4.235157 | 2.007791 |
| 2             | 9             | 0           | 5.240993                | 4.421116 | 0.956096 |
| 3             | 9             | 0           | 5.510448                | 3.589716 | 3.069371 |
| 4             | 7             | 0           | 6.693625                | 5.615323 | 2.480948 |
| 5             | 7             | 0           | 7.368124                | 3.417614 | 1.530328 |
| 6             | 6             | 0           | 5.972036                | 6.663243 | 2.900835 |
| 7             | 6             | 0           | 6.821766                | 7.713096 | 3.306048 |
| 8             | 1             | 0           | 6.503996                | 8.674283 | 3.685871 |
| 9             | 6             | 0           | 8.122684                | 7.265310 | 3.119155 |
| 10            | 1             | 0           | 9.033566                | 7.811397 | 3.323506 |
| 11            | 6             | 0           | 8.043483                | 5.946433 | 2.596468 |
| 12            | 6             | 0           | 9.049149                | 5.052265 | 2.198984 |
| 13            | 6             | 0           | 8.702073                | 3.800556 | 1.668268 |
| 14            | 6             | 0           | 9.509765                | 2.745805 | 1.164242 |
| 15            | 1             | 0           | 10.590675               | 2.737887 | 1.128959 |
| 16            | 6             | 0           | 8.653364                | 1.745224 | 0.724642 |
| 17            | 1             | 0           | 8.921491                | 0.797393 | 0.278719 |
| 18            | 6             | 0           | 7.341656                | 2.200628 | 0.970529 |
| 19            | 1             | 0           | 6.398575                | 1.708801 | 0.772615 |
| 20            | 1             | 0           | 4.890987                | 6.620951 | 2.897368 |
| 21            | 6             | 0           | 10.500242               | 5.464705 | 2.275077 |
| 22            | 1             | 0           | 10.643499               | 6.130813 | 3.131538 |
| 23            | 1             | 0           | 11.119018               | 4.581434 | 2.461354 |
| 24            | 6             | 0           | 10.982108               | 6.168571 | 0.989731 |
| 25            | 1             | 0           | 10.400161               | 7.075334 | 0.796829 |
| 26            | 1             | 0           | 12.036110               | 6.450185 | 1.086529 |
| 27            | 1             | 0           | 10.880147               | 5.511402 | 0.120349 |

**DFT B3LYP/6-31++G(d,p) optimised ground state structure:**

| Center Number | Atomic Number | Atomic Type | Coordinates (Angstroms) |          |          |
|---------------|---------------|-------------|-------------------------|----------|----------|
|               |               |             | X                       | Y        | Z        |
| 1             | 5             | 0           | 6.127958                | 4.273286 | 1.928173 |
| 2             | 9             | 0           | 5.356068                | 4.529128 | 0.795306 |
| 3             | 9             | 0           | 5.372896                | 3.619104 | 2.900054 |
| 4             | 7             | 0           | 6.700618                | 5.609733 | 2.500101 |
| 5             | 7             | 0           | 7.374521                | 3.412785 | 1.545066 |
| 6             | 6             | 0           | 5.979324                | 6.634687 | 2.972090 |



|    |   |   |           |          |          |
|----|---|---|-----------|----------|----------|
| 7  | 6 | 0 | 6.830350  | 7.675794 | 3.390027 |
| 8  | 1 | 0 | 6.515319  | 8.616469 | 3.813311 |
| 9  | 6 | 0 | 8.129145  | 7.247933 | 3.154779 |
| 10 | 1 | 0 | 9.036706  | 7.793285 | 3.361139 |
| 11 | 6 | 0 | 8.049797  | 5.947432 | 2.592704 |
| 12 | 6 | 0 | 9.054171  | 5.065480 | 2.170948 |
| 13 | 6 | 0 | 8.706497  | 3.806551 | 1.662147 |
| 14 | 6 | 0 | 9.513023  | 2.736678 | 1.194840 |
| 15 | 1 | 0 | 10.591129 | 2.726245 | 1.159672 |
| 16 | 6 | 0 | 8.658332  | 1.716959 | 0.801177 |
| 17 | 1 | 0 | 8.927382  | 0.753661 | 0.397476 |
| 18 | 6 | 0 | 7.347371  | 2.175026 | 1.034376 |
| 19 | 1 | 0 | 6.408282  | 1.671724 | 0.859634 |
| 20 | 1 | 0 | 4.901008  | 6.585141 | 2.994605 |
| 21 | 6 | 0 | 10.501505 | 5.488057 | 2.219913 |
| 22 | 1 | 0 | 10.653840 | 6.156997 | 3.069149 |
| 23 | 1 | 0 | 11.127606 | 4.611713 | 2.398658 |
| 24 | 6 | 0 | 10.957367 | 6.190077 | 0.924529 |
| 25 | 1 | 0 | 10.369943 | 7.091430 | 0.737388 |
| 26 | 1 | 0 | 12.008652 | 6.477674 | 1.004657 |
| 27 | 1 | 0 | 10.848246 | 5.531596 | 0.060231 |

DFT mpw1pw91/6-31++G(d,p) optimised ground state structure:

| Center<br>Number | Atomic<br>Number | Atomic<br>Type | Coordinates (Angstroms) |          |          |
|------------------|------------------|----------------|-------------------------|----------|----------|
|                  |                  |                | X                       | Y        | Z        |
| 1                | 5                | 0              | 6.139174                | 4.279817 | 1.921321 |
| 2                | 9                | 0              | 5.381739                | 4.540624 | 0.788178 |
| 3                | 9                | 0              | 5.380482                | 3.628840 | 2.882559 |
| 4                | 7                | 0              | 6.711069                | 5.607987 | 2.497963 |
| 5                | 7                | 0              | 7.382018                | 3.420482 | 1.546520 |
| 6                | 6                | 0              | 5.991967                | 6.627986 | 2.966770 |
| 7                | 6                | 0              | 6.838990                | 7.666342 | 3.386283 |
| 8                | 1                | 0              | 6.523181                | 8.606314 | 3.809500 |
| 9                | 6                | 0              | 8.134116                | 7.238560 | 3.153862 |
| 10               | 1                | 0              | 9.042660                | 7.781515 | 3.361634 |
| 11               | 6                | 0              | 8.051875                | 5.943208 | 2.593103 |
| 12               | 6                | 0              | 9.053958                | 5.063955 | 2.174341 |
| 13               | 6                | 0              | 8.706210                | 3.809843 | 1.665259 |
| 14               | 6                | 0              | 9.512403                | 2.745038 | 1.201178 |
| 15               | 1                | 0              | 10.590491               | 2.735422 | 1.168763 |
| 16               | 6                | 0              | 8.660135                | 1.729070 | 0.806380 |
| 17               | 1                | 0              | 8.928089                | 0.765790 | 0.402999 |
| 18               | 6                | 0              | 7.353622                | 2.188666 | 1.037437 |
| 19               | 1                | 0              | 6.413517                | 1.688288 | 0.861097 |
| 20               | 1                | 0              | 4.913847                | 6.577457 | 2.985995 |
| 21               | 6                | 0              | 10.493172               | 5.484679 | 2.221696 |
| 22               | 1                | 0              | 10.645565               | 6.153973 | 3.070017 |
| 23               | 1                | 0              | 11.119207               | 4.608782 | 2.399835 |
| 24               | 6                | 0              | 10.934356               | 6.180887 | 0.928843 |
| 25               | 1                | 0              | 10.341547               | 7.078314 | 0.744344 |
| 26               | 1                | 0              | 11.984185               | 6.472786 | 0.998178 |
| 27               | 1                | 0              | 10.819482               | 5.520020 | 0.068095 |

DFT wb97xd/6-31++G(d,p) optimised ground state structure:

| Center<br>Number | Atomic<br>Number | Atomic<br>Type | Coordinates (Angstroms) |          |          |
|------------------|------------------|----------------|-------------------------|----------|----------|
|                  |                  |                | X                       | Y        | Z        |
| 1                | 5                | 0              | 6.139609                | 4.254641 | 1.981325 |
| 2                | 9                | 0              | 5.309497                | 4.476266 | 0.886609 |
| 3                | 9                | 0              | 5.452622                | 3.601275 | 3.000295 |
| 4                | 7                | 0              | 6.710187                | 5.607772 | 2.503052 |
| 5                | 7                | 0              | 7.381252                | 3.416985 | 1.550803 |
| 6                | 6                | 0              | 5.990144                | 6.642570 | 2.941017 |
| 7                | 6                | 0              | 6.837958                | 7.690183 | 3.343695 |

|    |   |   |           |          |          |
|----|---|---|-----------|----------|----------|
| 8  | 1 | 0 | 6.521165  | 8.644401 | 3.738073 |
| 9  | 6 | 0 | 8.136294  | 7.250956 | 3.135186 |
| 10 | 1 | 0 | 9.047148  | 7.798004 | 3.334445 |
| 11 | 6 | 0 | 8.054351  | 5.941730 | 2.604831 |
| 12 | 6 | 0 | 9.056691  | 5.055164 | 2.195494 |
| 13 | 6 | 0 | 8.709361  | 3.803349 | 1.675287 |
| 14 | 6 | 0 | 9.514771  | 2.750973 | 1.179445 |
| 15 | 1 | 0 | 10.594994 | 2.745131 | 1.138378 |
| 16 | 6 | 0 | 8.659509  | 1.743859 | 0.759520 |
| 17 | 1 | 0 | 8.926741  | 0.791647 | 0.325574 |
| 18 | 6 | 0 | 7.351769  | 2.197629 | 1.009122 |
| 19 | 1 | 0 | 6.408035  | 1.703598 | 0.823824 |
| 20 | 1 | 0 | 4.910066  | 6.593608 | 2.949202 |
| 21 | 6 | 0 | 10.499927 | 5.475295 | 2.245987 |
| 22 | 1 | 0 | 10.654251 | 6.147700 | 3.093678 |
| 23 | 1 | 0 | 11.128728 | 4.598619 | 2.420759 |
| 24 | 6 | 0 | 10.930728 | 6.172310 | 0.945218 |
| 25 | 1 | 0 | 10.330421 | 7.068496 | 0.766159 |
| 26 | 1 | 0 | 11.981691 | 6.466964 | 1.007963 |
| 27 | 1 | 0 | 10.809146 | 5.505519 | 0.087207 |

DFT B3LYP/6-31G(d) optimised 1<sup>st</sup> excited-state structure:

| Center<br>Number | Atomic<br>Number | Atomic<br>Type | Coordinates (Angstroms) |          |          |
|------------------|------------------|----------------|-------------------------|----------|----------|
|                  |                  |                | X                       | Y        | Z        |
| 1                | 5                | 0              | 6.209973                | 4.074201 | 2.326134 |
| 2                | 9                | 0              | 5.088755                | 3.957836 | 1.528669 |
| 3                | 9                | 0              | 6.033722                | 3.466702 | 3.559517 |
| 4                | 7                | 0              | 6.668925                | 5.535343 | 2.451029 |
| 5                | 7                | 0              | 7.424246                | 3.356018 | 1.620968 |
| 6                | 6                | 0              | 5.862330                | 6.593792 | 2.693864 |
| 7                | 6                | 0              | 6.636543                | 7.731354 | 2.982553 |
| 8                | 1                | 0              | 6.246740                | 8.714721 | 3.209822 |
| 9                | 6                | 0              | 7.974581                | 7.353959 | 2.914658 |
| 10               | 1                | 0              | 8.840241                | 7.986522 | 3.052905 |
| 11               | 6                | 0              | 8.010359                | 5.967751 | 2.561745 |
| 12               | 6                | 0              | 9.071760                | 5.128326 | 2.273531 |
| 13               | 6                | 0              | 8.754251                | 3.808182 | 1.696898 |
| 14               | 6                | 0              | 9.533129                | 2.875205 | 1.095777 |
| 15               | 1                | 0              | 10.606162               | 2.899181 | 0.965775 |
| 16               | 6                | 0              | 8.626859                | 1.783600 | 0.613089 |
| 17               | 1                | 0              | 8.938984                | 0.878467 | 0.110460 |
| 18               | 6                | 0              | 7.356949                | 2.154190 | 0.954507 |
| 19               | 1                | 0              | 6.406446                | 1.665382 | 0.809032 |
| 20               | 1                | 0              | 4.787683                | 6.479723 | 2.669489 |
| 21               | 6                | 0              | 10.504894               | 5.565875 | 2.377015 |
| 22               | 1                | 0              | 10.598653               | 6.304405 | 3.181662 |
| 23               | 1                | 0              | 11.126840               | 4.712006 | 2.678775 |
| 24               | 6                | 0              | 11.076708               | 6.171305 | 1.075215 |
| 25               | 1                | 0              | 11.026455               | 5.458509 | 0.245125 |
| 26               | 1                | 0              | 10.509683               | 7.061042 | 0.782308 |
| 27               | 1                | 0              | 12.125186               | 6.461045 | 1.211627 |

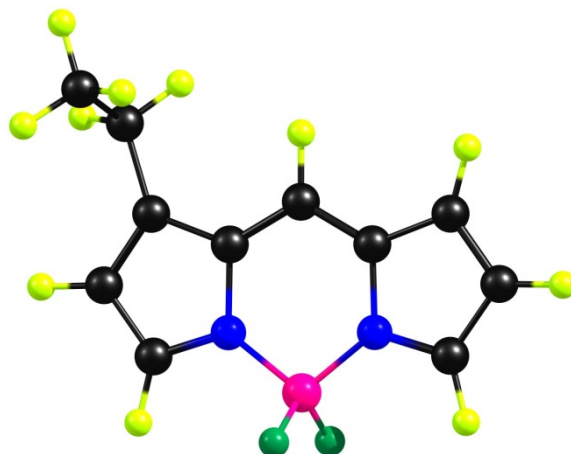

Figure S-19: DFT B3LYP/6-31G(d) optimised ground-state structure of **3.02**

**DFT B3LYP/6-31G(d) optimised ground state structure:**

| Center Number | Atomic Number | Atomic Type | Coordinates (Angstroms) |          |          |
|---------------|---------------|-------------|-------------------------|----------|----------|
|               |               |             | X                       | Y        | Z        |
| 1             | 5             | 0           | 6.134419                | 4.162158 | 2.005186 |
| 2             | 9             | 0           | 5.246070                | 4.387886 | 0.971540 |
| 3             | 9             | 0           | 5.533494                | 3.502522 | 3.059823 |
| 4             | 7             | 0           | 6.735322                | 5.529676 | 2.502733 |
| 5             | 7             | 0           | 7.365824                | 3.332894 | 1.484368 |
| 6             | 6             | 0           | 6.050922                | 6.551951 | 3.029802 |
| 7             | 6             | 0           | 6.920956                | 7.613235 | 3.355009 |
| 8             | 1             | 0           | 6.626780                | 8.558937 | 3.791118 |
| 9             | 6             | 0           | 8.209085                | 7.216967 | 3.006792 |
| 10            | 6             | 0           | 8.081267                | 5.898235 | 2.468338 |
| 11            | 6             | 0           | 9.031465                | 5.024326 | 1.955950 |
| 12            | 6             | 0           | 8.691599                | 3.762245 | 1.471523 |
| 13            | 6             | 0           | 9.487926                | 2.727456 | 0.917127 |
| 14            | 1             | 0           | 10.560469               | 2.769837 | 0.778419 |
| 15            | 6             | 0           | 8.631314                | 1.681019 | 0.600663 |
| 16            | 1             | 0           | 8.888440                | 0.727540 | 0.160309 |
| 17            | 6             | 0           | 7.332908                | 2.096563 | 0.966185 |
| 18            | 1             | 0           | 6.395783                | 1.563322 | 0.876473 |
| 19            | 1             | 0           | 4.977212                | 6.490373 | 3.149717 |
| 20            | 1             | 0           | 10.073175               | 5.330013 | 1.928691 |
| 21            | 6             | 0           | 9.487409                | 7.981567 | 3.198919 |
| 22            | 1             | 0           | 10.196215               | 7.735990 | 2.397868 |
| 23            | 1             | 0           | 9.278657                | 9.053925 | 3.103653 |
| 24            | 6             | 0           | 10.151893               | 7.715520 | 4.564509 |
| 25            | 1             | 0           | 10.401960               | 6.655556 | 4.682673 |
| 26            | 1             | 0           | 11.074551               | 8.298095 | 4.664808 |
| 27            | 1             | 0           | 9.481741                | 7.991964 | 5.385264 |

**DFT B3LYP/6-31++G(d,p) optimised ground state structure:**

| Center Number | Atomic Number | Atomic Type | Coordinates (Angstroms) |          |          |
|---------------|---------------|-------------|-------------------------|----------|----------|
|               |               |             | X                       | Y        | Z        |
| 1             | 5             | 0           | 6.149359                | 4.158061 | 2.018381 |
| 2             | 9             | 0           | 5.226611                | 4.376209 | 0.997167 |
| 3             | 9             | 0           | 5.553530                | 3.490570 | 3.087092 |
| 4             | 7             | 0           | 6.744004                | 5.524161 | 2.505793 |
| 5             | 7             | 0           | 7.364736                | 3.329384 | 1.478290 |
| 6             | 6             | 0           | 6.062632                | 6.547721 | 3.032082 |
| 7             | 6             | 0           | 6.936705                | 7.604083 | 3.355123 |
| 8             | 1             | 0           | 6.644813                | 8.548825 | 3.788429 |

|    |   |   |           |          |          |
|----|---|---|-----------|----------|----------|
| 9  | 6 | 0 | 8.222521  | 7.203150 | 3.006970 |
| 10 | 6 | 0 | 8.091334  | 5.886226 | 2.468923 |
| 11 | 6 | 0 | 9.036215  | 5.013395 | 1.951970 |
| 12 | 6 | 0 | 8.689778  | 3.756130 | 1.464105 |
| 13 | 6 | 0 | 9.479097  | 2.724083 | 0.898963 |
| 14 | 1 | 0 | 10.548466 | 2.763324 | 0.755421 |
| 15 | 6 | 0 | 8.618127  | 1.683444 | 0.577845 |
| 16 | 1 | 0 | 8.870345  | 0.735386 | 0.129622 |
| 17 | 6 | 0 | 7.323700  | 2.097451 | 0.950851 |
| 18 | 1 | 0 | 6.387645  | 1.566927 | 0.860288 |
| 19 | 1 | 0 | 4.990882  | 6.492534 | 3.153769 |
| 20 | 1 | 0 | 10.076766 | 5.314357 | 1.921841 |
| 21 | 6 | 0 | 9.499408  | 7.967042 | 3.197449 |
| 22 | 1 | 0 | 10.220864 | 7.687017 | 2.423364 |
| 23 | 1 | 0 | 9.297228  | 9.032809 | 3.054482 |
| 24 | 6 | 0 | 10.133005 | 7.754030 | 4.586130 |
| 25 | 1 | 0 | 10.377871 | 6.701790 | 4.751518 |
| 26 | 1 | 0 | 11.052656 | 8.337485 | 4.682321 |
| 27 | 1 | 0 | 9.448558  | 8.064179 | 5.379267 |

DFT mpw1pw91/6-31++G(d,p) optimised ground state structure:

| Center<br>Number | Atomic<br>Number | Atomic<br>Type | Coordinates (Angstroms) |          |          |
|------------------|------------------|----------------|-------------------------|----------|----------|
|                  |                  |                | X                       | Y        | Z        |
| 1                | 5                | 0              | 6.158699                | 4.164613 | 2.020571 |
| 2                | 9                | 0              | 5.242546                | 4.379994 | 1.001991 |
| 3                | 9                | 0              | 5.567247                | 3.500729 | 3.085176 |
| 4                | 7                | 0              | 6.749750                | 5.526323 | 2.504777 |
| 5                | 7                | 0              | 7.371994                | 3.341365 | 1.485133 |
| 6                | 6                | 0              | 6.068744                | 6.543967 | 3.027655 |
| 7                | 6                | 0              | 6.936911                | 7.600259 | 3.350022 |
| 8                | 1                | 0              | 6.643175                | 8.544207 | 3.782806 |
| 9                | 6                | 0              | 8.219215                | 7.201614 | 3.002888 |
| 10               | 6                | 0              | 8.088290                | 5.888842 | 2.468524 |
| 11               | 6                | 0              | 9.033959                | 5.020906 | 1.955232 |
| 12               | 6                | 0              | 8.689231                | 3.765896 | 1.470712 |
| 13               | 6                | 0              | 9.478615                | 2.738114 | 0.909863 |
| 14               | 1                | 0              | 10.547675               | 2.778790 | 0.767012 |
| 15               | 6                | 0              | 8.620924                | 1.699433 | 0.591168 |
| 16               | 1                | 0              | 8.872806                | 0.750833 | 0.144833 |
| 17               | 6                | 0              | 7.330744                | 2.114161 | 0.962482 |
| 18               | 1                | 0              | 6.394141                | 1.584827 | 0.873284 |
| 19               | 1                | 0              | 4.997301                | 6.485194 | 3.148544 |
| 20               | 1                | 0              | 10.073468               | 5.324171 | 1.926069 |
| 21               | 6                | 0              | 9.491995                | 7.959130 | 3.193051 |
| 22               | 1                | 0              | 10.207800               | 7.686052 | 2.412226 |
| 23               | 1                | 0              | 9.290160                | 9.025502 | 3.061335 |
| 24               | 6                | 0              | 10.123143               | 7.727597 | 4.569744 |
| 25               | 1                | 0              | 10.363178               | 6.673084 | 4.721474 |
| 26               | 1                | 0              | 11.044383               | 8.305232 | 4.674054 |
| 27               | 1                | 0              | 9.440762                | 8.028940 | 5.366833 |

DFT wb97xd/6-31++G(d,p) optimised ground state structure:

| Center<br>Number | Atomic<br>Number | Atomic<br>Type | Coordinates (Angstroms) |          |          |
|------------------|------------------|----------------|-------------------------|----------|----------|
|                  |                  |                | X                       | Y        | Z        |
| 1                | 5                | 0              | 6.149869                | 4.184858 | 1.994678 |
| 2                | 9                | 0              | 5.269166                | 4.395354 | 0.938259 |
| 3                | 9                | 0              | 5.517371                | 3.528134 | 3.045540 |
| 4                | 7                | 0              | 6.724328                | 5.551720 | 2.490311 |
| 5                | 7                | 0              | 7.381728                | 3.356966 | 1.508043 |
| 6                | 6                | 0              | 6.030302                | 6.566277 | 3.002716 |
| 7                | 6                | 0              | 6.889312                | 7.633555 | 3.331064 |
| 8                | 1                | 0              | 6.588086                | 8.578283 | 3.761636 |
| 9                | 6                | 0              | 8.177752                | 7.243002 | 2.996761 |

|    |   |   |           |          |          |
|----|---|---|-----------|----------|----------|
| 10 | 6 | 0 | 8.064600  | 5.926431 | 2.465881 |
| 11 | 6 | 0 | 9.026319  | 5.060174 | 1.977388 |
| 12 | 6 | 0 | 8.699944  | 3.791435 | 1.505644 |
| 13 | 6 | 0 | 9.505601  | 2.758030 | 0.977699 |
| 14 | 1 | 0 | 10.578511 | 2.802700 | 0.849651 |
| 15 | 6 | 0 | 8.658373  | 1.704535 | 0.665571 |
| 16 | 1 | 0 | 8.925154  | 0.747310 | 0.242619 |
| 17 | 6 | 0 | 7.357919  | 2.117917 | 1.008409 |
| 18 | 1 | 0 | 6.424263  | 1.580840 | 0.914263 |
| 19 | 1 | 0 | 4.956831  | 6.497395 | 3.115335 |
| 20 | 1 | 0 | 10.065767 | 5.373556 | 1.960582 |
| 21 | 6 | 0 | 9.451927  | 8.003156 | 3.202768 |
| 22 | 1 | 0 | 10.115211 | 7.858419 | 2.342272 |
| 23 | 1 | 0 | 9.223167  | 9.072689 | 3.241261 |
| 24 | 6 | 0 | 10.179722 | 7.586592 | 4.489699 |
| 25 | 1 | 0 | 10.442019 | 6.524486 | 4.466692 |
| 26 | 1 | 0 | 11.099672 | 8.164266 | 4.618559 |
| 27 | 1 | 0 | 9.543941  | 7.751696 | 5.364157 |

DFT B3LYP/6-31G(d) optimised 1<sup>st</sup> excited-state structure:

| Center Number | Atomic Number | Atomic Type | Coordinates (Angstroms) |          |           |
|---------------|---------------|-------------|-------------------------|----------|-----------|
|               |               |             | X                       | Y        | Z         |
| 1             | 5             | 0           | 6.230686                | 4.081275 | 2.279229  |
| 2             | 9             | 0           | 5.093368                | 4.070631 | 1.496467  |
| 3             | 9             | 0           | 6.037592                | 3.422611 | 3.483297  |
| 4             | 7             | 0           | 6.772702                | 5.508436 | 2.471636  |
| 5             | 7             | 0           | 7.391533                | 3.326536 | 1.516481  |
| 6             | 6             | 0           | 6.040368                | 6.603285 | 2.778479  |
| 7             | 6             | 0           | 6.890708                | 7.676803 | 3.097972  |
| 8             | 1             | 0           | 6.566791                | 8.672245 | 3.374587  |
| 9             | 6             | 0           | 8.208805                | 7.236746 | 2.985512  |
| 10            | 6             | 0           | 8.137860                | 5.858660 | 2.568341  |
| 11            | 6             | 0           | 9.123581                | 4.972019 | 2.206899  |
| 12            | 6             | 0           | 8.745854                | 3.702429 | 1.582550  |
| 13            | 6             | 0           | 9.462951                | 2.765374 | 0.918358  |
| 14            | 1             | 0           | 10.533720               | 2.746712 | 0.765528  |
| 15            | 6             | 0           | 8.489234                | 1.747599 | 0.402953  |
| 16            | 1             | 0           | 8.741807                | 0.855259 | -0.153234 |
| 17            | 6             | 0           | 7.247407                | 2.165038 | 0.792003  |
| 18            | 1             | 0           | 6.269994                | 1.733582 | 0.643783  |
| 19            | 1             | 0           | 4.960219                | 6.559967 | 2.770564  |
| 20            | 1             | 0           | 10.170966               | 5.234166 | 2.272454  |
| 21            | 6             | 0           | 9.470211                | 8.008803 | 3.230701  |
| 22            | 1             | 0           | 10.192397               | 7.805712 | 2.426933  |
| 23            | 1             | 0           | 9.249661                | 9.081930 | 3.179564  |
| 24            | 6             | 0           | 10.130379               | 7.691497 | 4.588017  |
| 25            | 1             | 0           | 10.377829               | 6.627297 | 4.667654  |
| 26            | 1             | 0           | 11.054150               | 8.267855 | 4.715452  |
| 27            | 1             | 0           | 9.456083                | 7.937308 | 5.415280  |

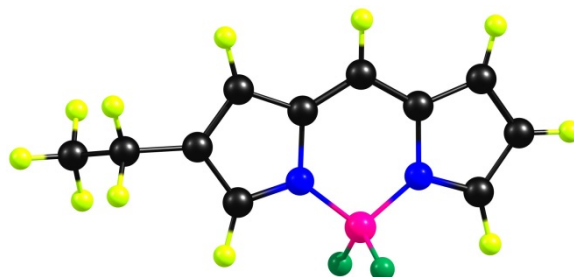

Figure S-20: DFT B3LYP/6-31G(d) optimised ground-state structure of **3.03**

DFT B3LYP/6-31G(d) optimised ground state structure:

| Center<br>Number | Atomic<br>Number | Atomic<br>Type | Coordinates (Angstroms) |           |          |
|------------------|------------------|----------------|-------------------------|-----------|----------|
|                  |                  |                | X                       | Y         | Z        |
| 1                | 5                | 0              | 6.136008                | 4.167561  | 2.067401 |
| 2                | 9                | 0              | 5.200344                | 4.273520  | 1.057858 |
| 3                | 9                | 0              | 5.608837                | 3.567256  | 3.194774 |
| 4                | 7                | 0              | 6.691243                | 5.594686  | 2.437410 |
| 5                | 7                | 0              | 7.385614                | 3.355469  | 1.563538 |
| 6                | 6                | 0              | 5.973901                | 6.647738  | 2.844949 |
| 7                | 6                | 0              | 6.814169                | 7.750665  | 3.153004 |
| 8                | 6                | 0              | 8.110381                | 7.312243  | 2.908996 |
| 9                | 6                | 0              | 8.035244                | 5.966705  | 2.460468 |
| 10               | 6                | 0              | 9.018866                | 5.070026  | 2.060098 |
| 11               | 6                | 0              | 8.710078                | 3.787289  | 1.611126 |
| 12               | 6                | 0              | 9.535006                | 2.742256  | 1.121102 |
| 13               | 1                | 0              | 10.612808               | 2.785720  | 1.032866 |
| 14               | 6                | 0              | 8.696706                | 1.688783  | 0.779849 |
| 15               | 1                | 0              | 8.976815                | 0.728792  | 0.368666 |
| 16               | 6                | 0              | 7.380630                | 2.109166  | 1.068993 |
| 17               | 1                | 0              | 6.449807                | 1.572234  | 0.942965 |
| 18               | 1                | 0              | 4.894916                | 6.583681  | 2.911318 |
| 19               | 1                | 0              | 10.058645               | 5.382611  | 2.084227 |
| 20               | 1                | 0              | 9.024731                | 7.879945  | 3.030671 |
| 21               | 6                | 0              | 6.358595                | 9.110356  | 3.607522 |
| 22               | 1                | 0              | 5.567982                | 9.000771  | 4.361504 |
| 23               | 1                | 0              | 7.191513                | 9.617793  | 4.109069 |
| 24               | 6                | 0              | 5.840017                | 9.995089  | 2.458787 |
| 25               | 1                | 0              | 4.986347                | 9.528330  | 1.954745 |
| 26               | 1                | 0              | 5.517694                | 10.972489 | 2.835457 |
| 27               | 1                | 0              | 6.620308                | 10.158114 | 1.707336 |

**DFT B3LYP/6-31++G(d,p) optimised ground state structure:**

| Center<br>Number | Atomic<br>Number | Atomic<br>Type | Coordinates (Angstroms) |           |          |
|------------------|------------------|----------------|-------------------------|-----------|----------|
|                  |                  |                | X                       | Y         | Z        |
| 1                | 5                | 0              | 6.139415                | 4.191759  | 1.997967 |
| 2                | 9                | 0              | 5.262603                | 4.327710  | 0.923752 |
| 3                | 9                | 0              | 5.504454                | 3.589451  | 3.082022 |
| 4                | 7                | 0              | 6.692199                | 5.599361  | 2.417423 |
| 5                | 7                | 0              | 7.389463                | 3.349596  | 1.569833 |
| 6                | 6                | 0              | 5.976511                | 6.641715  | 2.853695 |
| 7                | 6                | 0              | 6.816558                | 7.746751  | 3.145497 |
| 8                | 6                | 0              | 8.107917                | 7.322636  | 2.862039 |
| 9                | 6                | 0              | 8.032257                | 5.980094  | 2.406667 |
| 10               | 6                | 0              | 9.014620                | 5.088806  | 2.000177 |
| 11               | 6                | 0              | 8.708504                | 3.795264  | 1.586813 |
| 12               | 6                | 0              | 9.536500                | 2.737907  | 1.135251 |
| 13               | 1                | 0              | 10.610871               | 2.784089  | 1.039201 |
| 14               | 6                | 0              | 8.704872                | 1.663376  | 0.850156 |
| 15               | 1                | 0              | 8.989951                | 0.689695  | 0.484134 |
| 16               | 6                | 0              | 7.389205                | 2.082331  | 1.131762 |
| 17               | 1                | 0              | 6.465407                | 1.531295  | 1.037779 |
| 18               | 1                | 0              | 4.902351                | 6.569674  | 2.949996 |
| 19               | 1                | 0              | 10.050253               | 5.408087  | 2.003376 |
| 20               | 1                | 0              | 9.019604                | 7.893115  | 2.967089 |
| 21               | 6                | 0              | 6.364161                | 9.096237  | 3.627658 |
| 22               | 1                | 0              | 5.582839                | 8.968691  | 4.384543 |
| 23               | 1                | 0              | 7.199522                | 9.592021  | 4.131138 |
| 24               | 6                | 0              | 5.835050                | 10.002371 | 2.501493 |
| 25               | 1                | 0              | 4.978753                | 9.546548  | 1.997380 |
| 26               | 1                | 0              | 5.516531                | 10.969750 | 2.899590 |
| 27               | 1                | 0              | 6.606835                | 10.180960 | 1.748269 |

**DFT mpw1pw91/6-31++G(d,p) optimised ground state structure:**

| Center<br>Number | Atomic<br>Number | Atomic<br>Type | Coordinates (Angstroms) |           |          |
|------------------|------------------|----------------|-------------------------|-----------|----------|
|                  |                  |                | X                       | Y         | Z        |
| 1                | 5                | 0              | 6.144879                | 4.201283  | 2.003188 |
| 2                | 9                | 0              | 5.267249                | 4.337634  | 0.938548 |
| 3                | 9                | 0              | 5.521183                | 3.601161  | 3.086467 |
| 4                | 7                | 0              | 6.698344                | 5.602890  | 2.418632 |
| 5                | 7                | 0              | 7.388849                | 3.364286  | 1.570170 |
| 6                | 6                | 0              | 5.984826                | 6.641243  | 2.848695 |
| 7                | 6                | 0              | 6.821670                | 7.742266  | 3.145000 |
| 8                | 6                | 0              | 8.109783                | 7.316620  | 2.869756 |
| 9                | 6                | 0              | 8.031434                | 5.978745  | 2.415425 |
| 10               | 6                | 0              | 9.011242                | 5.089183  | 2.011993 |
| 11               | 6                | 0              | 8.701907                | 3.801884  | 1.593728 |
| 12               | 6                | 0              | 9.526463                | 2.749095  | 1.140176 |
| 13               | 1                | 0              | 10.600909               | 2.793113  | 1.047650 |
| 14               | 6                | 0              | 8.694246                | 1.682588  | 0.846675 |
| 15               | 1                | 0              | 8.975788                | 0.710400  | 0.475085 |
| 16               | 6                | 0              | 7.383938                | 2.105511  | 1.126561 |
| 17               | 1                | 0              | 6.457448                | 1.560419  | 1.027122 |
| 18               | 1                | 0              | 4.910264                | 6.569731  | 2.938175 |
| 19               | 1                | 0              | 10.047260               | 5.405198  | 2.020152 |
| 20               | 1                | 0              | 9.022150                | 7.884579  | 2.978805 |
| 21               | 6                | 0              | 6.369526                | 9.086825  | 3.620492 |
| 22               | 1                | 0              | 5.594665                | 8.960465  | 4.382993 |
| 23               | 1                | 0              | 7.205863                | 9.587226  | 4.115785 |
| 24               | 6                | 0              | 5.834345                | 9.974561  | 2.494893 |
| 25               | 1                | 0              | 4.978504                | 9.510582  | 1.999398 |
| 26               | 1                | 0              | 5.513652                | 10.944202 | 2.882784 |
| 27               | 1                | 0              | 6.600818                | 10.147604 | 1.736351 |

**DFT wb97xd/6-31++G(d,p) optimised ground state structure:**

| Center<br>Number | Atomic<br>Number | Atomic<br>Type | Coordinates (Angstroms) |           |          |
|------------------|------------------|----------------|-------------------------|-----------|----------|
|                  |                  |                | X                       | Y         | Z        |
| 1                | 5                | 0              | 6.143294                | 4.194803  | 2.018420 |
| 2                | 9                | 0              | 5.251892                | 4.329329  | 0.959380 |
| 3                | 9                | 0              | 5.530900                | 3.590654  | 3.111536 |
| 4                | 7                | 0              | 6.695894                | 5.599638  | 2.429762 |
| 5                | 7                | 0              | 7.387115                | 3.362374  | 1.572652 |
| 6                | 6                | 0              | 5.980741                | 6.637525  | 2.860668 |
| 7                | 6                | 0              | 6.816814                | 7.740887  | 3.157887 |
| 8                | 6                | 0              | 8.107369                | 7.319428  | 2.881637 |
| 9                | 6                | 0              | 8.032317                | 5.979540  | 2.426069 |
| 10               | 6                | 0              | 9.012889                | 5.090969  | 2.016620 |
| 11               | 6                | 0              | 8.703653                | 3.802040  | 1.592802 |
| 12               | 6                | 0              | 9.527611                | 2.752660  | 1.127997 |
| 13               | 1                | 0              | 10.603489               | 2.799501  | 1.029193 |
| 14               | 6                | 0              | 8.693626                | 1.684831  | 0.830710 |
| 15               | 1                | 0              | 8.975959                | 0.714947  | 0.448562 |
| 16               | 6                | 0              | 7.382134                | 2.105234  | 1.120080 |
| 17               | 1                | 0              | 6.452856                | 1.561299  | 1.021186 |
| 18               | 1                | 0              | 4.904467                | 6.563726  | 2.949944 |
| 19               | 1                | 0              | 10.050607               | 5.409239  | 2.022857 |
| 20               | 1                | 0              | 9.018759                | 7.893055  | 2.990907 |
| 21               | 6                | 0              | 6.358586                | 9.091371  | 3.625383 |
| 22               | 1                | 0              | 5.565521                | 8.970111  | 4.371884 |
| 23               | 1                | 0              | 7.188108                | 9.593230  | 4.134628 |
| 24               | 6                | 0              | 5.849980                | 9.974233  | 2.478150 |
| 25               | 1                | 0              | 5.007129                | 9.501059  | 1.964809 |
| 26               | 1                | 0              | 5.517294                | 10.946733 | 2.853200 |
| 27               | 1                | 0              | 6.638203                | 10.140880 | 1.737775 |

**DFT B3LYP/6-31G(d) optimised 1<sup>st</sup> excited-state structure:**

| Center Number | Atomic Number | Atomic Type | Coordinates (Angstroms) |           |          |
|---------------|---------------|-------------|-------------------------|-----------|----------|
|               |               |             | X                       | Y         | Z        |
| 1             | 5             | 0           | 6.238776                | 3.991162  | 2.455781 |
| 2             | 9             | 0           | 5.040665                | 3.907067  | 1.772823 |
| 3             | 9             | 0           | 6.143752                | 3.452533  | 3.729291 |
| 4             | 7             | 0           | 6.645769                | 5.508680  | 2.605991 |
| 5             | 7             | 0           | 7.392937                | 3.363538  | 1.646022 |
| 6             | 6             | 0           | 5.789799                | 6.531730  | 2.930128 |
| 7             | 6             | 0           | 6.516099                | 7.684776  | 3.097936 |
| 8             | 6             | 0           | 7.945136                | 7.302971  | 2.816537 |
| 9             | 6             | 0           | 7.962757                | 5.977872  | 2.525111 |
| 10            | 6             | 0           | 9.038982                | 5.089276  | 2.086063 |
| 11            | 6             | 0           | 8.721174                | 3.841939  | 1.603411 |
| 12            | 6             | 0           | 9.508885                | 2.849028  | 0.935610 |
| 13            | 1             | 0           | 10.567757               | 2.933227  | 0.732215 |
| 14            | 6             | 0           | 8.650463                | 1.819852  | 0.570523 |
| 15            | 1             | 0           | 8.904788                | 0.914607  | 0.035346 |
| 16            | 6             | 0           | 7.360650                | 2.165754  | 1.021078 |
| 17            | 1             | 0           | 6.434581                | 1.613563  | 0.942225 |
| 18            | 1             | 0           | 4.732052                | 6.346273  | 3.038610 |
| 19            | 1             | 0           | 10.054978               | 5.460278  | 2.060216 |
| 20            | 1             | 0           | 8.791368                | 7.977635  | 2.839485 |
| 21            | 6             | 0           | 6.047044                | 9.040781  | 3.478624 |
| 22            | 1             | 0           | 4.981592                | 9.005850  | 3.729837 |
| 23            | 1             | 0           | 6.578686                | 9.363629  | 4.388485 |
| 24            | 6             | 0           | 6.292969                | 10.100498 | 2.378319 |
| 25            | 1             | 0           | 5.746264                | 9.844782  | 1.465558 |
| 26            | 1             | 0           | 5.953439                | 11.082605 | 2.723507 |
| 27            | 1             | 0           | 7.355843                | 10.179383 | 2.125965 |

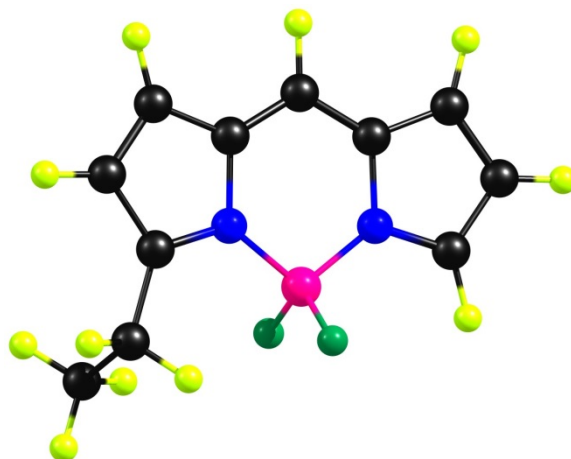

Figure S-21: DFT B3LYP/6-31G(d) optimised ground-state structure of **3.04**

**DFT B3LYP/6-31G(d) optimised ground state structure:**

| Center Number | Atomic Number | Atomic Type | Coordinates (Angstroms) |          |          |
|---------------|---------------|-------------|-------------------------|----------|----------|
|               |               |             | X                       | Y        | Z        |
| 1             | 5             | 0           | 6.169565                | 4.135870 | 1.852639 |
| 2             | 9             | 0           | 5.445575                | 4.277054 | 0.676631 |
| 3             | 9             | 0           | 5.407993                | 3.539075 | 2.844286 |
| 4             | 7             | 0           | 6.687800                | 5.545344 | 2.332858 |
| 5             | 7             | 0           | 7.451029                | 3.274446 | 1.580233 |
| 6             | 6             | 0           | 5.945581                | 6.588726 | 2.754039 |
| 7             | 6             | 0           | 6.802228                | 7.686365 | 3.045557 |
| 8             | 6             | 0           | 8.098320                | 7.282894 | 2.787132 |
| 9             | 6             | 0           | 8.030699                | 5.935790 | 2.340856 |
| 10            | 6             | 0           | 9.037010                | 5.050354 | 1.983837 |
| 11            | 6             | 0           | 8.765031                | 3.733619 | 1.612412 |



|    |   |   |           |          |          |
|----|---|---|-----------|----------|----------|
| 12 | 6 | 0 | 9.619210  | 2.660503 | 1.256831 |
| 13 | 1 | 0 | 10.698623 | 2.712915 | 1.198324 |
| 14 | 6 | 0 | 8.807310  | 1.557806 | 1.015446 |
| 15 | 1 | 0 | 9.115521  | 0.562718 | 0.725618 |
| 16 | 6 | 0 | 7.478706  | 1.979610 | 1.225795 |
| 17 | 1 | 0 | 6.560606  | 1.414168 | 1.137960 |
| 18 | 1 | 0 | 10.068200 | 5.390043 | 2.007162 |
| 19 | 1 | 0 | 9.009184  | 7.855675 | 2.904742 |
| 20 | 1 | 0 | 6.469915  | 8.649445 | 3.409877 |
| 21 | 6 | 0 | 4.450339  | 6.555872 | 2.841410 |
| 22 | 1 | 0 | 4.132955  | 5.550418 | 3.130994 |
| 23 | 1 | 0 | 4.138736  | 7.244813 | 3.635512 |
| 24 | 6 | 0 | 3.767154  | 6.951638 | 1.514840 |
| 25 | 1 | 0 | 4.039613  | 6.245701 | 0.727132 |
| 26 | 1 | 0 | 2.678636  | 6.936753 | 1.636748 |
| 27 | 1 | 0 | 4.061719  | 7.959421 | 1.201729 |

DFT B3LYP/6-31++G(d,p) optimised ground state structure:

| Center Number | Atomic Number | Atomic Type | Coordinates (Angstroms) |          |          |
|---------------|---------------|-------------|-------------------------|----------|----------|
|               |               |             | X                       | Y        | Z        |
| 1             | 5             | 0           | 6.187290                | 4.088897 | 1.943277 |
| 2             | 9             | 0           | 5.350194                | 4.164332 | 0.827199 |
| 3             | 9             | 0           | 5.515534                | 3.499644 | 3.016451 |
| 4             | 7             | 0           | 6.685418                | 5.525815 | 2.340486 |
| 5             | 7             | 0           | 7.462443                | 3.256247 | 1.593841 |
| 6             | 6             | 0           | 5.934271                | 6.573754 | 2.728332 |
| 7             | 6             | 0           | 6.784140                | 7.680267 | 3.002018 |
| 8             | 6             | 0           | 8.082930                | 7.275948 | 2.768163 |
| 9             | 6             | 0           | 8.026658                | 5.919833 | 2.352247 |
| 10            | 6             | 0           | 9.037378                | 5.039562 | 2.006113 |
| 11            | 6             | 0           | 8.771535                | 3.724297 | 1.630332 |
| 12            | 6             | 0           | 9.629466                | 2.666684 | 1.246170 |
| 13            | 1             | 0           | 10.705282               | 2.727909 | 1.179370 |
| 14            | 6             | 0           | 8.823638                | 1.565460 | 0.981291 |
| 15            | 1             | 0           | 9.136277                | 0.583327 | 0.663370 |
| 16            | 6             | 0           | 7.494920                | 1.970481 | 1.207847 |
| 17            | 1             | 0           | 6.583513                | 1.400105 | 1.110118 |
| 18            | 1             | 0           | 10.064535               | 5.384151 | 2.029357 |
| 19            | 1             | 0           | 8.987433                | 7.855272 | 2.878886 |
| 20            | 1             | 0           | 6.446848                | 8.649412 | 3.336729 |
| 21            | 6             | 0           | 4.441068                | 6.544146 | 2.805903 |
| 22            | 1             | 0           | 4.109787                | 5.531131 | 3.038506 |
| 23            | 1             | 0           | 4.133909                | 7.188169 | 3.635629 |
| 24            | 6             | 0           | 3.766221                | 7.027416 | 1.505042 |
| 25            | 1             | 0           | 4.027016                | 6.371521 | 0.673548 |
| 26            | 1             | 0           | 2.680009                | 7.015794 | 1.625107 |
| 27            | 1             | 0           | 4.069548                | 8.047464 | 1.255266 |

DFT mpw1pw91/6-31++G(d,p) optimised ground state structure:

| Center Number | Atomic Number | Atomic Type | Coordinates (Angstroms) |          |          |
|---------------|---------------|-------------|-------------------------|----------|----------|
|               |               |             | X                       | Y        | Z        |
| 1             | 5             | 0           | 6.190008                | 4.082606 | 1.972547 |
| 2             | 9             | 0           | 5.331804                | 4.142621 | 0.880724 |
| 3             | 9             | 0           | 5.552340                | 3.501840 | 3.062614 |
| 4             | 7             | 0           | 6.686905                | 5.519223 | 2.344216 |
| 5             | 7             | 0           | 7.459146                | 3.260212 | 1.603646 |
| 6             | 6             | 0           | 5.935572                | 6.562613 | 2.718977 |
| 7             | 6             | 0           | 6.777440                | 7.672767 | 2.981934 |
| 8             | 6             | 0           | 8.073595                | 7.270551 | 2.753588 |
| 9             | 6             | 0           | 8.018914                | 5.914535 | 2.351973 |
| 10            | 6             | 0           | 9.027919                | 5.038055 | 2.006686 |
| 11            | 6             | 0           | 8.760773                | 3.725761 | 1.634133 |
| 12            | 6             | 0           | 9.615956                | 2.675099 | 1.242601 |

|    |   |   |           |          |          |
|----|---|---|-----------|----------|----------|
| 13 | 1 | 0 | 10.690864 | 2.738608 | 1.169243 |
| 14 | 6 | 0 | 8.811647  | 1.577465 | 0.979187 |
| 15 | 1 | 0 | 9.121922  | 0.596942 | 0.655369 |
| 16 | 6 | 0 | 7.488711  | 1.981724 | 1.214913 |
| 17 | 1 | 0 | 6.576012  | 1.413080 | 1.121497 |
| 18 | 1 | 0 | 10.054228 | 5.383786 | 2.024639 |
| 19 | 1 | 0 | 8.976839  | 7.852463 | 2.857533 |
| 20 | 1 | 0 | 6.436209  | 8.643799 | 3.305877 |
| 21 | 6 | 0 | 4.449146  | 6.524055 | 2.791253 |
| 22 | 1 | 0 | 4.123343  | 5.502701 | 2.989694 |
| 23 | 1 | 0 | 4.136177  | 7.138452 | 3.640187 |
| 24 | 6 | 0 | 3.788735  | 7.044145 | 1.508668 |
| 25 | 1 | 0 | 4.058813  | 6.416132 | 0.659552 |
| 26 | 1 | 0 | 2.702298  | 7.026703 | 1.616127 |
| 27 | 1 | 0 | 4.091942  | 8.071100 | 1.293222 |

DFT wb97xd/6-31++G(d,p) optimised ground state structure:

| Center<br>Number | Atomic<br>Number | Atomic<br>Type | Coordinates (Angstroms) |          |          |
|------------------|------------------|----------------|-------------------------|----------|----------|
|                  |                  |                | X                       | Y        | Z        |
| 1                | 5                | 0              | 6.186442                | 4.078592 | 1.993347 |
| 2                | 9                | 0              | 5.309155                | 4.132731 | 0.910627 |
| 3                | 9                | 0              | 5.566477                | 3.495745 | 3.098012 |
| 4                | 7                | 0              | 6.682296                | 5.519697 | 2.357889 |
| 5                | 7                | 0              | 7.454552                | 3.262329 | 1.605843 |
| 6                | 6                | 0              | 5.933234                | 6.562135 | 2.736823 |
| 7                | 6                | 0              | 6.774809                | 7.674211 | 3.005610 |
| 8                | 6                | 0              | 8.072951                | 7.273001 | 2.776889 |
| 9                | 6                | 0              | 8.019365                | 5.916151 | 2.368862 |
| 10               | 6                | 0              | 9.027913                | 5.041515 | 2.015172 |
| 11               | 6                | 0              | 8.759981                | 3.727741 | 1.633142 |
| 12               | 6                | 0              | 9.612841                | 2.680494 | 1.226360 |
| 13               | 1                | 0              | 10.689330               | 2.745211 | 1.146479 |
| 14               | 6                | 0              | 8.804720                | 1.582938 | 0.955927 |
| 15               | 1                | 0              | 9.113375                | 0.604501 | 0.618504 |
| 16               | 6                | 0              | 7.481768                | 1.986152 | 1.203665 |
| 17               | 1                | 0              | 6.565157                | 1.420299 | 1.112462 |
| 18               | 1                | 0              | 10.056330               | 5.388102 | 2.031168 |
| 19               | 1                | 0              | 8.977662                | 7.856490 | 2.879981 |
| 20               | 1                | 0              | 6.429689                | 8.645265 | 3.331832 |
| 21               | 6                | 0              | 4.440591                | 6.531252 | 2.792899 |
| 22               | 1                | 0              | 4.101150                | 5.515934 | 3.009119 |
| 23               | 1                | 0              | 4.119763                | 7.171357 | 3.621366 |
| 24               | 6                | 0              | 3.810399                | 7.025771 | 1.480818 |
| 25               | 1                | 0              | 4.092791                | 6.370255 | 0.654136 |
| 26               | 1                | 0              | 2.720301                | 7.024373 | 1.566306 |
| 27               | 1                | 0              | 4.134215                | 8.044796 | 1.247364 |

DFT B3LYP/6-31G(d) optimised 1<sup>st</sup> excited-state structure:

| Center<br>Number | Atomic<br>Number | Atomic<br>Type | Coordinates (Angstroms) |          |          |
|------------------|------------------|----------------|-------------------------|----------|----------|
|                  |                  |                | X                       | Y        | Z        |
| 1                | 5                | 0              | 6.198305                | 4.218693 | 1.718781 |
| 2                | 9                | 0              | 5.625902                | 4.385053 | 0.461723 |
| 3                | 9                | 0              | 5.326948                | 3.568031 | 2.581087 |
| 4                | 7                | 0              | 6.717868                | 5.548422 | 2.302695 |
| 5                | 7                | 0              | 7.469557                | 3.301069 | 1.543951 |
| 6                | 6                | 0              | 5.954055                | 6.571792 | 2.782313 |
| 7                | 6                | 0              | 6.798022                | 7.660403 | 3.110322 |
| 8                | 6                | 0              | 8.103793                | 7.302950 | 2.818763 |
| 9                | 6                | 0              | 8.071299                | 5.963599 | 2.314346 |
| 10               | 6                | 0              | 9.096052                | 5.133222 | 1.930836 |
| 11               | 6                | 0              | 8.805174                | 3.747121 | 1.580087 |
| 12               | 6                | 0              | 9.601119                | 2.685260 | 1.309754 |
| 13               | 1                | 0              | 10.681579               | 2.672927 | 1.261433 |

|    |   |   |           |          |          |
|----|---|---|-----------|----------|----------|
| 14 | 6 | 0 | 8.702907  | 1.505594 | 1.099098 |
| 15 | 1 | 0 | 9.021752  | 0.502180 | 0.852245 |
| 16 | 6 | 0 | 7.421059  | 1.955383 | 1.269110 |
| 17 | 1 | 0 | 6.473528  | 1.443777 | 1.206740 |
| 18 | 1 | 0 | 10.123188 | 5.472393 | 1.944475 |
| 19 | 1 | 0 | 9.003039  | 7.886837 | 2.960700 |
| 20 | 1 | 0 | 6.451991  | 8.601440 | 3.518885 |
| 21 | 6 | 0 | 4.460029  | 6.524096 | 2.861613 |
| 22 | 1 | 0 | 4.145441  | 5.518499 | 3.156494 |
| 23 | 1 | 0 | 4.137268  | 7.215667 | 3.649149 |
| 24 | 6 | 0 | 3.768388  | 6.902918 | 1.532624 |
| 25 | 1 | 0 | 4.062299  | 6.212666 | 0.738305 |
| 26 | 1 | 0 | 2.679609  | 6.857241 | 1.649204 |
| 27 | 1 | 0 | 4.037087  | 7.919804 | 1.225871 |

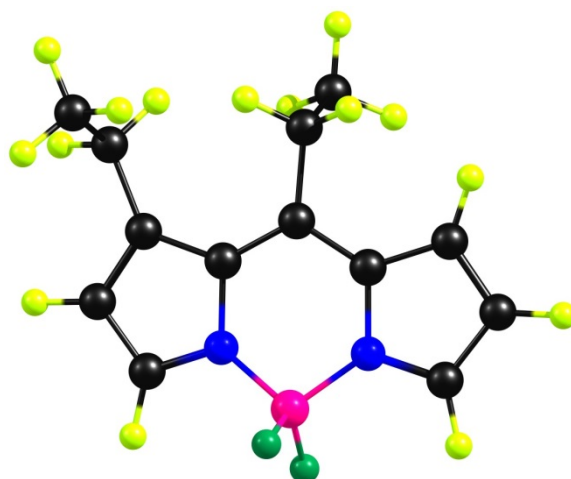

Figure S-22: DFT B3LYP/6-31G(d) optimised ground-state structure of **4.01**

**DFT B3LYP/6-31G(d) optimised ground state structure:**

| Center Number | Atomic Number | Atomic Type | Coordinates (Angstroms) |          |          |
|---------------|---------------|-------------|-------------------------|----------|----------|
|               |               |             | X                       | Y        | Z        |
| 1             | 5             | 0           | 6.181271                | 4.172295 | 2.134819 |
| 2             | 9             | 0           | 5.160886                | 4.316282 | 1.213540 |
| 3             | 9             | 0           | 5.739400                | 3.547339 | 3.288686 |
| 4             | 7             | 0           | 6.784248                | 5.574316 | 2.490605 |
| 5             | 7             | 0           | 7.370585                | 3.375374 | 1.516905 |
| 6             | 6             | 0           | 6.061225                | 6.622337 | 2.893240 |
| 7             | 6             | 0           | 6.906944                | 7.687347 | 3.245787 |
| 8             | 6             | 0           | 8.220777                | 7.269055 | 3.051612 |
| 9             | 6             | 0           | 8.141763                | 5.917093 | 2.560810 |
| 10            | 6             | 0           | 9.106467                | 4.996296 | 2.116171 |
| 11            | 6             | 0           | 8.709218                | 3.748883 | 1.594023 |
| 12            | 6             | 0           | 9.479748                | 2.701893 | 1.020056 |
| 13            | 1             | 0           | 10.556227               | 2.686496 | 0.919429 |
| 14            | 6             | 0           | 8.593198                | 1.717762 | 0.599261 |
| 15            | 1             | 0           | 8.831425                | 0.782663 | 0.111381 |
| 16            | 6             | 0           | 7.301840                | 2.172855 | 0.927747 |
| 17            | 1             | 0           | 6.344474                | 1.693784 | 0.772177 |
| 18            | 1             | 0           | 6.589993                | 8.660717 | 3.596982 |
| 19            | 1             | 0           | 4.980801                | 6.567449 | 2.911254 |
| 20            | 6             | 0           | 10.582492               | 5.325768 | 2.097212 |
| 21            | 1             | 0           | 10.832933               | 5.976715 | 2.935919 |
| 22            | 1             | 0           | 11.152939               | 4.404530 | 2.247512 |
| 23            | 6             | 0           | 9.416401                | 8.127893 | 3.372723 |
| 24            | 1             | 0           | 10.213782               | 8.000470 | 2.634063 |
| 25            | 1             | 0           | 9.104550                | 9.176542 | 3.296731 |
| 26            | 6             | 0           | 11.024927               | 5.982991 | 0.773355 |
| 27            | 1             | 0           | 12.096927               | 6.206393 | 0.801437 |

|    |   |   |           |          |           |
|----|---|---|-----------|----------|-----------|
| 28 | 1 | 0 | 10.834171 | 5.317319 | -0.074183 |
| 29 | 1 | 0 | 10.484073 | 6.917215 | 0.591107  |
| 30 | 6 | 0 | 9.973895  | 7.888337 | 4.790370  |
| 31 | 1 | 0 | 10.821634 | 8.553865 | 4.988878  |
| 32 | 1 | 0 | 9.203250  | 8.080505 | 5.544030  |
| 33 | 1 | 0 | 10.312994 | 6.855349 | 4.925317  |

**DFT B3LYP/6-31++G(d,p) optimised ground state structure:**

| Center<br>Number | Atomic<br>Number | Atomic<br>Type | Coordinates (Angstroms) |          |           |
|------------------|------------------|----------------|-------------------------|----------|-----------|
|                  |                  |                | X                       | Y        | Z         |
| 1                | 5                | 0              | 6.173787                | 4.269589 | 1.902555  |
| 2                | 9                | 0              | 5.439322                | 4.557899 | 0.749556  |
| 3                | 9                | 0              | 5.360881                | 3.657172 | 2.856555  |
| 4                | 7                | 0              | 6.787828                | 5.581465 | 2.483369  |
| 5                | 7                | 0              | 7.385817                | 3.362232 | 1.554012  |
| 6                | 6                | 0              | 6.069773                | 6.594862 | 2.972228  |
| 7                | 6                | 0              | 6.917313                | 7.645678 | 3.353821  |
| 8                | 6                | 0              | 8.225690                | 7.256636 | 3.083705  |
| 9                | 6                | 0              | 8.143891                | 5.934018 | 2.524547  |
| 10               | 6                | 0              | 9.109630                | 5.024152 | 2.066608  |
| 11               | 6                | 0              | 8.720368                | 3.751083 | 1.608349  |
| 12               | 6                | 0              | 9.500748                | 2.657113 | 1.152354  |
| 13               | 1                | 0              | 10.576387               | 2.630053 | 1.079871  |
| 14               | 6                | 0              | 8.624874                | 1.628312 | 0.830125  |
| 15               | 1                | 0              | 8.874110                | 0.647434 | 0.457123  |
| 16               | 6                | 0              | 7.328538                | 2.105229 | 1.091277  |
| 17               | 1                | 0              | 6.378683                | 1.607001 | 0.968580  |
| 18               | 1                | 0              | 6.603610                | 8.586750 | 3.779998  |
| 19               | 1                | 0              | 4.993032                | 6.531433 | 3.024135  |
| 20               | 6                | 0              | 10.574905               | 5.381765 | 1.995974  |
| 21               | 1                | 0              | 10.845392               | 6.020184 | 2.834566  |
| 22               | 1                | 0              | 11.169256               | 4.473260 | 2.101645  |
| 23               | 6                | 0              | 9.422125                | 8.107332 | 3.415238  |
| 24               | 1                | 0              | 10.196586               | 8.019962 | 2.651158  |
| 25               | 1                | 0              | 9.099766                | 9.152674 | 3.393718  |
| 26               | 6                | 0              | 10.945097               | 6.074956 | 0.668932  |
| 27               | 1                | 0              | 12.011077               | 6.316270 | 0.654943  |
| 28               | 1                | 0              | 10.730424               | 5.425770 | -0.182542 |
| 29               | 1                | 0              | 10.382707               | 7.001084 | 0.531594  |
| 30               | 6                | 0              | 10.019050               | 7.810104 | 4.804935  |
| 31               | 1                | 0              | 10.867080               | 8.469945 | 5.007871  |
| 32               | 1                | 0              | 9.271487                | 7.965896 | 5.586228  |
| 33               | 1                | 0              | 10.366222               | 6.776817 | 4.885924  |

**DFT mpw1pw91/6-31++G(d,p) optimised ground state structure:**

| Center<br>Number | Atomic<br>Number | Atomic<br>Type | Coordinates (Angstroms) |          |          |
|------------------|------------------|----------------|-------------------------|----------|----------|
|                  |                  |                | X                       | Y        | Z        |
| 1                | 5                | 0              | 6.186117                | 4.280497 | 1.893881 |
| 2                | 9                | 0              | 5.473320                | 4.572981 | 0.736839 |
| 3                | 9                | 0              | 5.364490                | 3.673174 | 2.833264 |
| 4                | 7                | 0              | 6.797583                | 5.583744 | 2.481795 |
| 5                | 7                | 0              | 7.395774                | 3.372756 | 1.560580 |
| 6                | 6                | 0              | 6.081330                | 6.591445 | 2.969311 |
| 7                | 6                | 0              | 6.925045                | 7.640527 | 3.351229 |
| 8                | 6                | 0              | 8.229163                | 7.252004 | 3.080147 |
| 9                | 6                | 0              | 8.144419                | 5.935511 | 2.523078 |
| 10               | 6                | 0              | 9.109278                | 5.029704 | 2.069739 |
| 11               | 6                | 0              | 8.722265                | 3.759630 | 1.614912 |
| 12               | 6                | 0              | 9.504083                | 2.670221 | 1.166736 |
| 13               | 1                | 0              | 10.579942               | 2.645210 | 1.097017 |
| 14               | 6                | 0              | 8.632094                | 1.642200 | 0.848094 |
| 15               | 1                | 0              | 8.881760                | 0.660022 | 0.479930 |
| 16               | 6                | 0              | 7.339400                | 2.119685 | 1.104843 |

|    |   |   |           |          |           |
|----|---|---|-----------|----------|-----------|
| 17 | 1 | 0 | 6.389337  | 1.622186 | 0.982717  |
| 18 | 1 | 0 | 6.611385  | 8.580523 | 3.778900  |
| 19 | 1 | 0 | 5.004887  | 6.525622 | 3.020031  |
| 20 | 6 | 0 | 10.564909 | 5.389946 | 1.998341  |
| 21 | 1 | 0 | 10.832897 | 6.029362 | 2.837058  |
| 22 | 1 | 0 | 11.162188 | 4.483608 | 2.102420  |
| 23 | 6 | 0 | 9.424415  | 8.092424 | 3.409830  |
| 24 | 1 | 0 | 10.193713 | 8.007125 | 2.640476  |
| 25 | 1 | 0 | 9.106102  | 9.138356 | 3.396446  |
| 26 | 6 | 0 | 10.917629 | 6.080782 | 0.675895  |
| 27 | 1 | 0 | 11.980059 | 6.332304 | 0.651789  |
| 28 | 1 | 0 | 10.701138 | 5.428754 | -0.172009 |
| 29 | 1 | 0 | 10.344529 | 7.000100 | 0.541701  |
| 30 | 6 | 0 | 10.017845 | 7.779386 | 4.787497  |
| 31 | 1 | 0 | 10.871710 | 8.427957 | 4.996749  |
| 32 | 1 | 0 | 9.272824  | 7.934006 | 5.570261  |
| 33 | 1 | 0 | 10.353825 | 6.742377 | 4.859454  |

DFT wb97xd/6-31++G(d,p) optimised ground state structure:

| Center<br>Number | Atomic<br>Number | Atomic<br>Type | Coordinates (Angstroms) |          |           |
|------------------|------------------|----------------|-------------------------|----------|-----------|
|                  |                  |                | X                       | Y        | Z         |
| 1                | 5                | 0              | 6.188763                | 4.217357 | 2.043786  |
| 2                | 9                | 0              | 5.268236                | 4.414872 | 1.017161  |
| 3                | 9                | 0              | 5.582888                | 3.592664 | 3.132812  |
| 4                | 7                | 0              | 6.793697                | 5.581717 | 2.487906  |
| 5                | 7                | 0              | 7.389659                | 3.376914 | 1.541204  |
| 6                | 6                | 0              | 6.074240                | 6.615149 | 2.914877  |
| 7                | 6                | 0              | 6.918683                | 7.676603 | 3.272273  |
| 8                | 6                | 0              | 8.226519                | 7.265217 | 3.053392  |
| 9                | 6                | 0              | 8.146074                | 5.926249 | 2.549756  |
| 10               | 6                | 0              | 9.111099                | 5.012249 | 2.111778  |
| 11               | 6                | 0              | 8.720868                | 3.755280 | 1.615083  |
| 12               | 6                | 0              | 9.497340                | 2.698680 | 1.085611  |
| 13               | 1                | 0              | 10.574433               | 2.681460 | 0.997484  |
| 14               | 6                | 0              | 8.618527                | 1.696778 | 0.696262  |
| 15               | 1                | 0              | 8.863567                | 0.744797 | 0.248966  |
| 16               | 6                | 0              | 7.327417                | 2.157168 | 0.998443  |
| 17               | 1                | 0              | 6.372641                | 1.671202 | 0.853402  |
| 18               | 1                | 0              | 6.603179                | 8.640237 | 3.647683  |
| 19               | 1                | 0              | 4.994827                | 6.556745 | 2.943914  |
| 20               | 6                | 0              | 10.576039               | 5.357732 | 2.072419  |
| 21               | 1                | 0              | 10.835527               | 6.000978 | 2.912610  |
| 22               | 1                | 0              | 11.162462               | 4.444441 | 2.194178  |
| 23               | 6                | 0              | 9.425999                | 8.109216 | 3.378528  |
| 24               | 1                | 0              | 10.206864               | 8.002681 | 2.621092  |
| 25               | 1                | 0              | 9.114390                | 9.158181 | 3.343898  |
| 26               | 6                | 0              | 10.958171               | 6.036590 | 0.747527  |
| 27               | 1                | 0              | 12.022651               | 6.286522 | 0.744130  |
| 28               | 1                | 0              | 10.755252               | 5.373711 | -0.097847 |
| 29               | 1                | 0              | 10.386226               | 6.956285 | 0.594440  |
| 30               | 6                | 0              | 9.994834                | 7.810128 | 4.773758  |
| 31               | 1                | 0              | 10.856188               | 8.450434 | 4.985467  |
| 32               | 1                | 0              | 9.235818                | 7.989088 | 5.540362  |
| 33               | 1                | 0              | 10.312379               | 6.766806 | 4.866598  |

DFT B3LYP/6-31G(d) optimised 1<sup>st</sup> excited-state structure:

| Center<br>Number | Atomic<br>Number | Atomic<br>Type | Coordinates (Angstroms) |          |          |
|------------------|------------------|----------------|-------------------------|----------|----------|
|                  |                  |                | X                       | Y        | Z        |
| 1                | 5                | 0              | 6.255384                | 4.089529 | 2.377392 |
| 2                | 9                | 0              | 5.055215                | 4.065450 | 1.692828 |
| 3                | 9                | 0              | 6.166273                | 3.441849 | 3.600770 |
| 4                | 7                | 0              | 6.796280                | 5.520644 | 2.508820 |
| 5                | 7                | 0              | 7.357684                | 3.361805 | 1.532082 |

|    |   |   |           |          |           |
|----|---|---|-----------|----------|-----------|
| 6  | 6 | 0 | 6.036622  | 6.593659 | 2.814576  |
| 7  | 6 | 0 | 6.859964  | 7.682633 | 3.128577  |
| 8  | 6 | 0 | 8.192523  | 7.279391 | 3.016075  |
| 9  | 6 | 0 | 8.164333  | 5.895562 | 2.591044  |
| 10 | 6 | 0 | 9.151016  | 5.004608 | 2.194495  |
| 11 | 6 | 0 | 8.713439  | 3.745679 | 1.550999  |
| 12 | 6 | 0 | 9.401957  | 2.824251 | 0.832012  |
| 13 | 1 | 0 | 10.463816 | 2.803839 | 0.632053  |
| 14 | 6 | 0 | 8.412764  | 1.821623 | 0.332418  |
| 15 | 1 | 0 | 8.643174  | 0.940495 | -0.250745 |
| 16 | 6 | 0 | 7.184389  | 2.226997 | 0.784214  |
| 17 | 1 | 0 | 6.202940  | 1.794663 | 0.667169  |
| 18 | 1 | 0 | 6.517929  | 8.671156 | 3.408811  |
| 19 | 1 | 0 | 4.958477  | 6.517097 | 2.816468  |
| 20 | 6 | 0 | 10.630801 | 5.271998 | 2.235255  |
| 21 | 1 | 0 | 10.868109 | 5.946313 | 3.062054  |
| 22 | 1 | 0 | 11.153093 | 4.332109 | 2.461239  |
| 23 | 6 | 0 | 9.371791  | 8.163781 | 3.312151  |
| 24 | 1 | 0 | 10.187567 | 7.989110 | 2.601967  |
| 25 | 1 | 0 | 9.062903  | 9.206101 | 3.162677  |
| 26 | 6 | 0 | 11.211763 | 5.856143 | 0.926967  |
| 27 | 1 | 0 | 12.294951 | 6.000179 | 1.017116  |
| 28 | 1 | 0 | 11.026446 | 5.193963 | 0.075057  |
| 29 | 1 | 0 | 10.756197 | 6.823854 | 0.692790  |
| 30 | 6 | 0 | 9.905165  | 8.016988 | 4.752156  |
| 31 | 1 | 0 | 10.749387 | 8.695003 | 4.924906  |
| 32 | 1 | 0 | 9.121013  | 8.253297 | 5.479286  |
| 33 | 1 | 0 | 10.242093 | 6.994362 | 4.955273  |

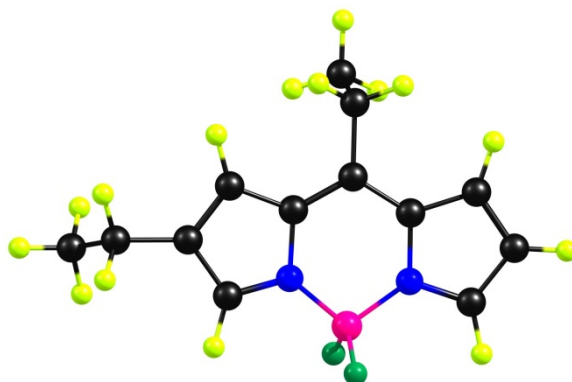

Figure S-23: DFT B3LYP/6-31G(d) optimised ground-state structure of **4.02**

**DFT B3LYP/6-31G(d) optimised ground state structure:**

| Center Number | Atomic Number | Atomic Type | Coordinates (Angstroms) |           |           |
|---------------|---------------|-------------|-------------------------|-----------|-----------|
|               |               |             | X                       | Y         | Z         |
| 1             | 5             | 0           | 1.570929                | -1.435475 | -0.160103 |
| 2             | 9             | 0           | 2.018725                | -1.818825 | -1.411681 |
| 3             | 9             | 0           | 2.035239                | -2.282476 | 0.827811  |
| 4             | 7             | 0           | 0.002562                | -1.398875 | -0.145593 |
| 5             | 7             | 0           | 2.011072                | 0.038926  | 0.137458  |
| 6             | 6             | 0           | -0.808006               | -2.457380 | -0.260581 |
| 7             | 6             | 0           | -2.167140               | -2.056666 | -0.279681 |
| 8             | 6             | 0           | -2.148894               | -0.670290 | -0.168614 |
| 9             | 6             | 0           | -0.792314               | -0.254657 | -0.083875 |
| 10            | 6             | 0           | -0.222863               | 1.016284  | 0.072376  |
| 11            | 6             | 0           | 1.170728                | 1.149902  | 0.193424  |
| 12            | 6             | 0           | 1.981083                | 2.294974  | 0.412886  |
| 13            | 1             | 0           | 1.626880                | 3.311990  | 0.512354  |
| 14            | 6             | 0           | 3.298736                | 1.859770  | 0.486579  |
| 15            | 1             | 0           | 4.182274                | 2.460556  | 0.652680  |
| 16            | 6             | 0           | 3.271529                | 0.462069  | 0.311763  |
| 17            | 1             | 0           | 4.091726                | -0.243332 | 0.305221  |

|    |   |   |           |           |           |
|----|---|---|-----------|-----------|-----------|
| 18 | 1 | 0 | -0.397070 | -3.457531 | -0.317824 |
| 19 | 6 | 0 | -1.101710 | 2.244514  | 0.065774  |
| 20 | 1 | 0 | -2.073406 | 1.999999  | 0.506011  |
| 21 | 1 | 0 | -0.656664 | 3.015051  | 0.702826  |
| 22 | 6 | 0 | -1.308506 | 2.808486  | -1.354984 |
| 23 | 1 | 0 | -1.949341 | 3.696090  | -1.319402 |
| 24 | 1 | 0 | -0.352959 | 3.091899  | -1.807415 |
| 25 | 1 | 0 | -1.783107 | 2.067122  | -2.005604 |
| 26 | 1 | 0 | -3.013213 | -0.019538 | -0.136379 |
| 27 | 6 | 0 | -3.358632 | -2.963946 | -0.421962 |
| 28 | 1 | 0 | -4.244597 | -2.459901 | -0.016717 |
| 29 | 1 | 0 | -3.211474 | -3.863426 | 0.190254  |
| 30 | 6 | 0 | -3.633788 | -3.384777 | -1.877340 |
| 31 | 1 | 0 | -4.506995 | -4.044795 | -1.933729 |
| 32 | 1 | 0 | -3.825022 | -2.509756 | -2.508285 |
| 33 | 1 | 0 | -2.777110 | -3.919279 | -2.302943 |

DFT B3LYP/6-31++G(d,p) optimised ground state structure:

| Center<br>Number | Atomic<br>Number | Atomic<br>Type | Coordinates (Angstroms) |           |           |
|------------------|------------------|----------------|-------------------------|-----------|-----------|
|                  |                  |                | X                       | Y         | Z         |
| 1                | 5                | 0              | 1.564730                | -1.441570 | -0.077649 |
| 2                | 9                | 0              | 2.071897                | -1.932447 | -1.281366 |
| 3                | 9                | 0              | 1.987952                | -2.231511 | 0.990629  |
| 4                | 7                | 0              | 0.003497                | -1.403889 | -0.131638 |
| 5                | 7                | 0              | 2.013416                | 0.038611  | 0.131542  |
| 6                | 6                | 0              | -0.804146               | -2.462161 | -0.263183 |
| 7                | 6                | 0              | -2.160754               | -2.059859 | -0.287882 |
| 8                | 6                | 0              | -2.144522               | -0.676087 | -0.162968 |
| 9                | 6                | 0              | -0.789953               | -0.260246 | -0.065736 |
| 10               | 6                | 0              | -0.223589               | 1.010282  | 0.084285  |
| 11               | 6                | 0              | 1.169752                | 1.145556  | 0.191578  |
| 12               | 6                | 0              | 1.980220                | 2.294077  | 0.374476  |
| 13               | 1                | 0              | 1.627307                | 3.309443  | 0.465318  |
| 14               | 6                | 0              | 3.300613                | 1.864980  | 0.419839  |
| 15               | 1                | 0              | 4.183442                | 2.470489  | 0.551581  |
| 16               | 6                | 0              | 3.276777                | 0.466991  | 0.266306  |
| 17               | 1                | 0              | 4.099699                | -0.231677 | 0.249697  |
| 18               | 1                | 0              | -0.395038               | -3.460488 | -0.325974 |
| 19               | 6                | 0              | -1.103230               | 2.235929  | 0.085123  |
| 20               | 1                | 0              | -2.067370               | 1.988570  | 0.533906  |
| 21               | 1                | 0              | -0.653566               | 3.003045  | 0.718670  |
| 22               | 6                | 0              | -1.326731               | 2.805262  | -1.330541 |
| 23               | 1                | 0              | -1.966560               | 3.690037  | -1.282295 |
| 24               | 1                | 0              | -0.380379               | 3.092932  | -1.793357 |
| 25               | 1                | 0              | -1.808566               | 2.070098  | -1.978680 |
| 26               | 1                | 0              | -3.006897               | -0.027038 | -0.132677 |
| 27               | 6                | 0              | -3.349917               | -2.964778 | -0.447496 |
| 28               | 1                | 0              | -4.231601               | -2.471937 | -0.026412 |
| 29               | 1                | 0              | -3.196446               | -3.873878 | 0.143810  |
| 30               | 6                | 0              | -3.631779               | -3.354025 | -1.909579 |
| 31               | 1                | 0              | -4.501702               | -4.013536 | -1.974912 |
| 32               | 1                | 0              | -3.829336               | -2.468213 | -2.519065 |
| 33               | 1                | 0              | -2.778551               | -3.876260 | -2.350646 |

DFT mpw1pw91/6-31++G(d,p) optimised ground state structure:

| Center<br>Number | Atomic<br>Number | Atomic<br>Type | Coordinates (Angstroms) |           |           |
|------------------|------------------|----------------|-------------------------|-----------|-----------|
|                  |                  |                | X                       | Y         | Z         |
| 1                | 5                | 0              | 1.548493                | -1.435059 | -0.089893 |
| 2                | 9                | 0              | 2.044280                | -1.916381 | -1.294256 |
| 3                | 9                | 0              | 1.973115                | -2.226529 | 0.967668  |
| 4                | 7                | 0              | -0.007406               | -1.393475 | -0.134795 |
| 5                | 7                | 0              | 1.997914                | 0.038245  | 0.123796  |
| 6                | 6                | 0              | -0.812542               | -2.445464 | -0.268838 |

|    |   |   |           |           |           |
|----|---|---|-----------|-----------|-----------|
| 7  | 6 | 0 | -2.165316 | -2.043385 | -0.288232 |
| 8  | 6 | 0 | -2.146245 | -0.664390 | -0.157040 |
| 9  | 6 | 0 | -0.794453 | -0.256033 | -0.061868 |
| 10 | 6 | 0 | -0.227736 | 1.009211  | 0.090616  |
| 11 | 6 | 0 | 1.162364  | 1.140179  | 0.191358  |
| 12 | 6 | 0 | 1.970220  | 2.284453  | 0.372987  |
| 13 | 1 | 0 | 1.617848  | 3.299501  | 0.468400  |
| 14 | 6 | 0 | 3.286463  | 1.854346  | 0.409927  |
| 15 | 1 | 0 | 4.171266  | 2.456941  | 0.538589  |
| 16 | 6 | 0 | 3.257388  | 0.460962  | 0.252551  |
| 17 | 1 | 0 | 4.077508  | -0.240452 | 0.228769  |
| 18 | 1 | 0 | -0.403478 | -3.443136 | -0.338191 |
| 19 | 6 | 0 | -1.099745 | 2.230055  | 0.095233  |
| 20 | 1 | 0 | -2.062443 | 1.984284  | 0.546831  |
| 21 | 1 | 0 | -0.645891 | 2.995317  | 0.727193  |
| 22 | 6 | 0 | -1.319028 | 2.788955  | -1.315357 |
| 23 | 1 | 0 | -1.955238 | 3.675498  | -1.274842 |
| 24 | 1 | 0 | -0.371420 | 3.069311  | -1.778292 |
| 25 | 1 | 0 | -1.801326 | 2.051170  | -1.958861 |
| 26 | 1 | 0 | -3.006384 | -0.012775 | -0.122462 |
| 27 | 6 | 0 | -3.349826 | -2.942940 | -0.450445 |
| 28 | 1 | 0 | -4.237028 | -2.435392 | -0.062156 |
| 29 | 1 | 0 | -3.214665 | -3.836074 | 0.167653  |
| 30 | 6 | 0 | -3.593476 | -3.362571 | -1.901493 |
| 31 | 1 | 0 | -4.463422 | -4.019307 | -1.976610 |
| 32 | 1 | 0 | -3.769188 | -2.490807 | -2.535686 |
| 33 | 1 | 0 | -2.731934 | -3.897556 | -2.307549 |

DFT wb97xd/6-31++G(d,p) optimised ground state structure:

| Center<br>Number | Atomic<br>Number | Atomic<br>Type | Coordinates (Angstroms) |           |           |
|------------------|------------------|----------------|-------------------------|-----------|-----------|
|                  |                  |                | X                       | Y         | Z         |
| 1                | 5                | 0              | 1.569758                | -1.445804 | 0.019381  |
| 2                | 9                | 0              | 2.107677                | -2.006457 | -1.136274 |
| 3                | 9                | 0              | 1.961112                | -2.164853 | 1.145560  |
| 4                | 7                | 0              | 0.014917                | -1.412467 | -0.079215 |
| 5                | 7                | 0              | 2.011454                | 0.041378  | 0.150574  |
| 6                | 6                | 0              | -0.782958               | -2.470019 | -0.228995 |
| 7                | 6                | 0              | -2.138159               | -2.075889 | -0.271428 |
| 8                | 6                | 0              | -2.131872               | -0.695020 | -0.138222 |
| 9                | 6                | 0              | -0.783450               | -0.278181 | -0.018864 |
| 10               | 6                | 0              | -0.225295               | 0.994284  | 0.119420  |
| 11               | 6                | 0              | 1.166457                | 1.141175  | 0.204083  |
| 12               | 6                | 0              | 1.968477                | 2.298393  | 0.328544  |
| 13               | 1                | 0              | 1.608482                | 3.315483  | 0.396040  |
| 14               | 6                | 0              | 3.291668                | 1.879751  | 0.346172  |
| 15               | 1                | 0              | 4.175397                | 2.494981  | 0.429376  |
| 16               | 6                | 0              | 3.270854                | 0.479320  | 0.235370  |
| 17               | 1                | 0              | 4.095701                | -0.219288 | 0.214044  |
| 18               | 1                | 0              | -0.365913               | -3.466548 | -0.295560 |
| 19               | 6                | 0              | -1.110249               | 2.210353  | 0.100780  |
| 20               | 1                | 0              | -2.064597               | 1.974525  | 0.578735  |
| 21               | 1                | 0              | -0.650761               | 3.006177  | 0.691940  |
| 22               | 6                | 0              | -1.355559               | 2.705204  | -1.333820 |
| 23               | 1                | 0              | -1.988929               | 3.596336  | -1.320763 |
| 24               | 1                | 0              | -0.412112               | 2.958940  | -1.824767 |
| 25               | 1                | 0              | -1.852115               | 1.936273  | -1.931689 |
| 26               | 1                | 0              | -2.998553               | -0.047210 | -0.124764 |
| 27               | 6                | 0              | -3.316586               | -2.982903 | -0.474157 |
| 28               | 1                | 0              | -4.188586               | -2.559057 | 0.035600  |
| 29               | 1                | 0              | -3.118580               | -3.948788 | 0.003749  |
| 30               | 6                | 0              | -3.645919               | -3.204820 | -1.956292 |
| 31               | 1                | 0              | -4.503126               | -3.875650 | -2.068888 |
| 32               | 1                | 0              | -3.885114               | -2.256456 | -2.447187 |
| 33               | 1                | 0              | -2.794850               | -3.646460 | -2.483778 |

DFT B3LYP/6-31G(d) optimised 1<sup>st</sup> excited-state structure:



| Center Number | Atomic Number | Atomic Type | Coordinates (Angstroms) |           |           |
|---------------|---------------|-------------|-------------------------|-----------|-----------|
|               |               |             | X                       | Y         | Z         |
| 1             | 5             | 0           | 1.677773                | -1.336637 | -0.359187 |
| 2             | 9             | 0           | 2.027771                | -1.409156 | -1.699247 |
| 3             | 9             | 0           | 2.238545                | -2.365557 | 0.373894  |
| 4             | 7             | 0           | 0.110343                | -1.418680 | -0.261600 |
| 5             | 7             | 0           | 2.010271                | 0.036241  | 0.254291  |
| 6             | 6             | 0           | -0.630206               | -2.569226 | -0.263631 |
| 7             | 6             | 0           | -1.965804               | -2.241544 | -0.281683 |
| 8             | 6             | 0           | -2.009041               | -0.739331 | -0.259089 |
| 9             | 6             | 0           | -0.727034               | -0.293022 | -0.241621 |
| 10            | 6             | 0           | -0.172598               | 1.067748  | -0.089880 |
| 11            | 6             | 0           | 1.169530                | 1.173380  | 0.224125  |
| 12            | 6             | 0           | 1.963407                | 2.289392  | 0.647498  |
| 13            | 1             | 0           | 1.611057                | 3.305610  | 0.754092  |
| 14            | 6             | 0           | 3.231012                | 1.806209  | 0.950025  |
| 15            | 1             | 0           | 4.075343                | 2.375077  | 1.316459  |
| 16            | 6             | 0           | 3.227327                | 0.421866  | 0.696960  |
| 17            | 1             | 0           | 4.029689                | -0.296975 | 0.786822  |
| 18            | 1             | 0           | -0.143949               | -3.532900 | -0.275706 |
| 19            | 6             | 0           | -1.083394               | 2.251949  | -0.231601 |
| 20            | 1             | 0           | -2.027471               | 2.062583  | 0.300331  |
| 21            | 1             | 0           | -0.631989               | 3.120051  | 0.260328  |
| 22            | 6             | 0           | -1.402191               | 2.615455  | -1.698045 |
| 23            | 1             | 0           | -2.086424               | 3.470913  | -1.744285 |
| 24            | 1             | 0           | -0.486707               | 2.876935  | -2.238522 |
| 25            | 1             | 0           | -1.870371               | 1.775844  | -2.222824 |
| 26            | 1             | 0           | -2.911790               | -0.143665 | -0.234912 |
| 27            | 6             | 0           | -3.148457               | -3.136645 | -0.340609 |
| 28            | 1             | 0           | -3.811078               | -2.912252 | 0.511345  |
| 29            | 1             | 0           | -2.828850               | -4.178259 | -0.229260 |
| 30            | 6             | 0           | -3.970697               | -2.977140 | -1.641379 |
| 31            | 1             | 0           | -4.843841               | -3.637195 | -1.615511 |
| 32            | 1             | 0           | -4.326370               | -1.949024 | -1.767467 |
| 33            | 1             | 0           | -3.365133               | -3.235343 | -2.515408 |

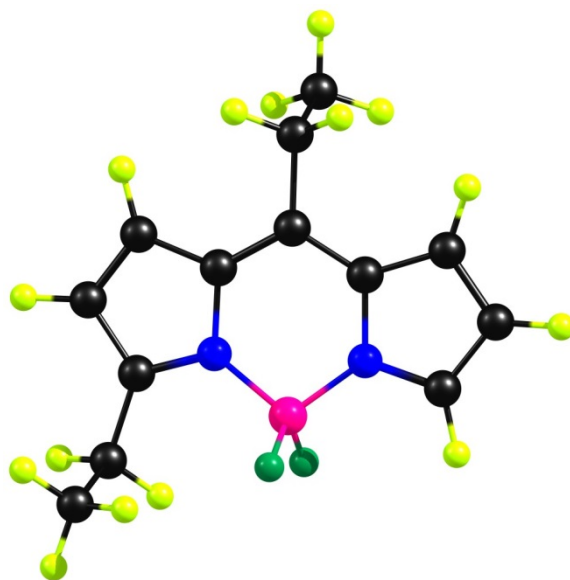

Figure S-24: DFT B3LYP/6-31G(d) optimised ground-state structure of **4.03**

**DFT B3LYP/6-31G(d) optimised ground state structure:**

| Center Number | Atomic Number | Atomic Type | Coordinates (Angstroms) |   |   |
|---------------|---------------|-------------|-------------------------|---|---|
|               |               |             | X                       | Y | Z |

|    |   |   |           |          |          |
|----|---|---|-----------|----------|----------|
| 1  | 5 | 0 | 6.148657  | 4.164231 | 1.806822 |
| 2  | 9 | 0 | 5.322923  | 4.370964 | 0.711912 |
| 3  | 9 | 0 | 5.489532  | 3.456410 | 2.804269 |
| 4  | 7 | 0 | 6.663785  | 5.535362 | 2.373226 |
| 5  | 7 | 0 | 7.426853  | 3.382205 | 1.364756 |
| 6  | 6 | 0 | 5.905559  | 6.561580 | 2.808686 |
| 7  | 6 | 0 | 6.751742  | 7.598065 | 3.282496 |
| 8  | 6 | 0 | 8.057843  | 7.172258 | 3.127063 |
| 9  | 6 | 0 | 8.010243  | 5.873590 | 2.550452 |
| 10 | 6 | 0 | 9.045462  | 5.017853 | 2.161015 |
| 11 | 6 | 0 | 8.745650  | 3.777857 | 1.569592 |
| 12 | 6 | 0 | 9.589146  | 2.754824 | 1.066634 |
| 13 | 1 | 0 | 10.670620 | 2.763167 | 1.076836 |
| 14 | 6 | 0 | 8.766018  | 1.754691 | 0.559225 |
| 15 | 1 | 0 | 9.068334  | 0.825855 | 0.095440 |
| 16 | 6 | 0 | 7.440678  | 2.181032 | 0.764402 |
| 17 | 1 | 0 | 6.513944  | 1.682941 | 0.512997 |
| 18 | 6 | 0 | 10.485925 | 5.448796 | 2.311692 |
| 19 | 1 | 0 | 10.584205 | 6.095808 | 3.188735 |
| 20 | 1 | 0 | 11.107204 | 4.568671 | 2.505316 |
| 21 | 1 | 0 | 8.956311  | 7.718123 | 3.381085 |
| 22 | 1 | 0 | 6.409331  | 8.542533 | 3.684372 |
| 23 | 6 | 0 | 4.406981  | 6.540513 | 2.812553 |
| 24 | 1 | 0 | 4.054900  | 5.971602 | 1.947933 |
| 25 | 1 | 0 | 4.051336  | 7.571560 | 2.697809 |
| 26 | 6 | 0 | 11.016323 | 6.187737 | 1.065983 |
| 27 | 1 | 0 | 10.433623 | 7.093452 | 0.869938 |
| 28 | 1 | 0 | 12.062263 | 6.477037 | 1.214775 |
| 29 | 1 | 0 | 10.958484 | 5.551116 | 0.177530 |
| 30 | 6 | 0 | 3.821396  | 5.933322 | 4.105143 |
| 31 | 1 | 0 | 4.134626  | 4.891784 | 4.206457 |
| 32 | 1 | 0 | 4.152823  | 6.488286 | 4.989892 |
| 33 | 1 | 0 | 2.726894  | 5.967301 | 4.071619 |

### DFT B3LYP/6-31++G(d,p) optimised ground state structure:

| Center Number | Atomic Number | Atomic Type | Coordinates (Angstroms) |          |          |
|---------------|---------------|-------------|-------------------------|----------|----------|
|               |               |             | X                       | Y        | Z        |
| 1             | 5             | 0           | 6.157400                | 4.203548 | 1.697571 |
| 2             | 9             | 0           | 5.433297                | 4.487868 | 0.535566 |
| 3             | 9             | 0           | 5.361915                | 3.488832 | 2.599142 |
| 4             | 7             | 0           | 6.664349                | 5.529294 | 2.357196 |
| 5             | 7             | 0           | 7.429027                | 3.378945 | 1.343135 |
| 6             | 6             | 0           | 5.903722                | 6.537986 | 2.822702 |
| 7             | 6             | 0           | 6.748423                | 7.560922 | 3.325339 |
| 8             | 6             | 0           | 8.053925                | 7.144445 | 3.153388 |
| 9             | 6             | 0           | 8.010701                | 5.863930 | 2.540794 |
| 10            | 6             | 0           | 9.045563                | 5.015199 | 2.144000 |
| 11            | 6             | 0           | 8.745591                | 3.774019 | 1.557066 |
| 12            | 6             | 0           | 9.588407                | 2.736990 | 1.089454 |
| 13            | 1             | 0           | 10.666816               | 2.736202 | 1.117979 |
| 14            | 6             | 0           | 8.767245                | 1.728911 | 0.595948 |
| 15            | 1             | 0           | 9.070706                | 0.788622 | 0.163255 |
| 16            | 6             | 0           | 7.442888                | 2.164031 | 0.771362 |
| 17            | 1             | 0           | 6.520530                | 1.663944 | 0.517356 |
| 18            | 6             | 0           | 10.484172               | 5.444359 | 2.299384 |
| 19            | 1             | 0           | 10.578971               | 6.088284 | 3.175798 |
| 20            | 1             | 0           | 11.101897               | 4.565091 | 2.493592 |
| 21            | 1             | 0           | 8.948056                | 7.682858 | 3.426423 |
| 22            | 1             | 0           | 6.407011                | 8.488911 | 3.758276 |
| 23            | 6             | 0           | 4.407637                | 6.520176 | 2.828052 |
| 24            | 1             | 0           | 4.047617                | 5.911056 | 1.997974 |
| 25            | 1             | 0           | 4.058167                | 7.543370 | 2.658429 |
| 26            | 6             | 0           | 11.021711               | 6.185026 | 1.058227 |
| 27            | 1             | 0           | 10.444352               | 7.090753 | 0.860331 |
| 28            | 1             | 0           | 12.064649               | 6.472086 | 1.214772 |
| 29            | 1             | 0           | 10.971106               | 5.553061 | 0.169127 |
| 30            | 6             | 0           | 3.822237                | 5.991780 | 4.154008 |
| 31            | 1             | 0           | 4.123044                | 4.956123 | 4.317242 |
| 32            | 1             | 0           | 4.158020                | 6.592239 | 5.003540 |

33 1 0 2.730464 6.031664 4.120228

DFT mpw1pw91/6-31++G(d,p) optimised ground state structure:

| Center<br>Number | Atomic<br>Number | Atomic<br>Type | Coordinates (Angstroms) |          |          |
|------------------|------------------|----------------|-------------------------|----------|----------|
|                  |                  |                | X                       | Y        | Z        |
| 1                | 5                | 0              | 6.162120                | 4.218040 | 1.679105 |
| 2                | 9                | 0              | 5.463344                | 4.518416 | 0.513723 |
| 3                | 9                | 0              | 5.352278                | 3.506726 | 2.559125 |
| 4                | 7                | 0              | 6.670515                | 5.528077 | 2.353982 |
| 5                | 7                | 0              | 7.428715                | 3.389869 | 1.337824 |
| 6                | 6                | 0              | 5.912350                | 6.528194 | 2.821942 |
| 7                | 6                | 0              | 6.751756                | 7.545098 | 3.334528 |
| 8                | 6                | 0              | 8.053674                | 7.129583 | 3.163533 |
| 9                | 6                | 0              | 8.007907                | 5.858003 | 2.543423 |
| 10               | 6                | 0              | 9.039456                | 5.011626 | 2.148391 |
| 11               | 6                | 0              | 8.737859                | 3.777629 | 1.556721 |
| 12               | 6                | 0              | 9.579215                | 2.744777 | 1.092798 |
| 13               | 1                | 0              | 10.657376               | 2.742484 | 1.127058 |
| 14               | 6                | 0              | 8.759850                | 1.742936 | 0.594628 |
| 15               | 1                | 0              | 9.061460                | 0.802794 | 0.161284 |
| 16               | 6                | 0              | 7.440457                | 2.181906 | 0.765658 |
| 17               | 1                | 0              | 6.516934                | 1.686948 | 0.506797 |
| 18               | 6                | 0              | 10.470644               | 5.434980 | 2.306514 |
| 19               | 1                | 0              | 10.564300               | 6.078979 | 3.182384 |
| 20               | 1                | 0              | 11.085059               | 4.554326 | 2.502384 |
| 21               | 1                | 0              | 8.948545                | 7.663486 | 3.442611 |
| 22               | 1                | 0              | 6.409020                | 8.469251 | 3.773642 |
| 23               | 6                | 0              | 4.423150                | 6.504855 | 2.821411 |
| 24               | 1                | 0              | 4.070977                | 5.870726 | 2.007624 |
| 25               | 1                | 0              | 4.069941                | 7.520332 | 2.620858 |
| 26               | 6                | 0              | 10.999861               | 6.168112 | 1.068592 |
| 27               | 1                | 0              | 10.420057               | 7.071311 | 0.870521 |
| 28               | 1                | 0              | 12.042262               | 6.457132 | 1.218008 |
| 29               | 1                | 0              | 10.944794               | 5.533638 | 0.182483 |
| 30               | 6                | 0              | 3.846373                | 6.013334 | 4.154256 |
| 31               | 1                | 0              | 4.155549                | 4.985810 | 4.346360 |
| 32               | 1                | 0              | 4.178584                | 6.638584 | 4.985931 |
| 33               | 1                | 0              | 2.755233                | 6.042560 | 4.122558 |

DFT wb97xd/6-31++G(d,p) optimised ground state structure:

| Center<br>Number | Atomic<br>Number | Atomic<br>Type | Coordinates (Angstroms) |          |          |
|------------------|------------------|----------------|-------------------------|----------|----------|
|                  |                  |                | X                       | Y        | Z        |
| 1                | 5                | 0              | 6.163382                | 4.205687 | 1.695458 |
| 2                | 9                | 0              | 5.452881                | 4.493961 | 0.529017 |
| 3                | 9                | 0              | 5.363332                | 3.490991 | 2.588371 |
| 4                | 7                | 0              | 6.665066                | 5.527094 | 2.358936 |
| 5                | 7                | 0              | 7.434942                | 3.386177 | 1.349716 |
| 6                | 6                | 0              | 5.905029                | 6.533798 | 2.808111 |
| 7                | 6                | 0              | 6.740090                | 7.562922 | 3.309182 |
| 8                | 6                | 0              | 8.045311                | 7.147537 | 3.151006 |
| 9                | 6                | 0              | 8.005291                | 5.864160 | 2.550053 |
| 10               | 6                | 0              | 9.040023                | 5.016443 | 2.166312 |
| 11               | 6                | 0              | 8.745572                | 3.777684 | 1.571824 |
| 12               | 6                | 0              | 9.591939                | 2.752466 | 1.099991 |
| 13               | 1                | 0              | 10.672588               | 2.755601 | 1.130706 |
| 14               | 6                | 0              | 8.774930                | 1.748269 | 0.593120 |
| 15               | 1                | 0              | 9.081466                | 0.811941 | 0.150763 |
| 16               | 6                | 0              | 7.452266                | 2.180528 | 0.768135 |
| 17               | 1                | 0              | 6.528530                | 1.683889 | 0.506328 |
| 18               | 6                | 0              | 10.473624               | 5.445918 | 2.322694 |
| 19               | 1                | 0              | 10.567819               | 6.106151 | 3.188422 |
| 20               | 1                | 0              | 11.093261               | 4.569258 | 2.528522 |
| 21               | 1                | 0              | 8.939464                | 7.690276 | 3.423748 |

|    |   |   |           |          |          |
|----|---|---|-----------|----------|----------|
| 22 | 1 | 0 | 6.391105  | 8.493932 | 3.733321 |
| 23 | 6 | 0 | 4.410556  | 6.506857 | 2.813206 |
| 24 | 1 | 0 | 4.050253  | 5.883483 | 1.992282 |
| 25 | 1 | 0 | 4.054149  | 7.526854 | 2.635333 |
| 26 | 6 | 0 | 10.989827 | 6.163972 | 1.065617 |
| 27 | 1 | 0 | 10.401054 | 7.062390 | 0.860987 |
| 28 | 1 | 0 | 12.034172 | 6.457978 | 1.201417 |
| 29 | 1 | 0 | 10.925825 | 5.511344 | 0.190680 |
| 30 | 6 | 0 | 3.853585  | 5.988130 | 4.148429 |
| 31 | 1 | 0 | 4.175069  | 4.958153 | 4.317863 |
| 32 | 1 | 0 | 4.196829  | 6.605429 | 4.984472 |
| 33 | 1 | 0 | 2.760384  | 6.011251 | 4.132632 |

DFT B3LYP/6-31G(d) optimised 1<sup>st</sup> excited-state structure:

| Center Number | Atomic Number | Atomic Type | Coordinates (Angstroms) |          |           |
|---------------|---------------|-------------|-------------------------|----------|-----------|
|               |               |             | X                       | Y        | Z         |
| 1             | 5             | 0           | 6.134205                | 4.117661 | 1.957974  |
| 2             | 9             | 0           | 5.155394                | 4.207016 | 0.973812  |
| 3             | 9             | 0           | 5.648550                | 3.427343 | 3.067691  |
| 4             | 7             | 0           | 6.656037                | 5.522464 | 2.372022  |
| 5             | 7             | 0           | 7.377608                | 3.395320 | 1.372215  |
| 6             | 6             | 0           | 5.903267                | 6.597377 | 2.705734  |
| 7             | 6             | 0           | 6.767369                | 7.643518 | 3.134939  |
| 8             | 6             | 0           | 8.081115                | 7.180958 | 3.062230  |
| 9             | 6             | 0           | 8.024193                | 5.851941 | 2.578459  |
| 10            | 6             | 0           | 9.073986                | 4.961441 | 2.266103  |
| 11            | 6             | 0           | 8.735434                | 3.748852 | 1.597109  |
| 12            | 6             | 0           | 9.538824                | 2.773931 | 0.993635  |
| 13            | 1             | 0           | 10.619430               | 2.762186 | 0.975260  |
| 14            | 6             | 0           | 8.670076                | 1.837247 | 0.389594  |
| 15            | 1             | 0           | 8.951247                | 0.950166 | -0.162669 |
| 16            | 6             | 0           | 7.350287                | 2.267316 | 0.644408  |
| 17            | 1             | 0           | 6.410107                | 1.818877 | 0.355476  |
| 18            | 6             | 0           | 10.511031               | 5.336107 | 2.497690  |
| 19            | 1             | 0           | 10.584958               | 5.953094 | 3.401579  |
| 20            | 1             | 0           | 11.092649               | 4.428319 | 2.701026  |
| 21            | 1             | 0           | 8.983019                | 7.728089 | 3.297365  |
| 22            | 1             | 0           | 6.434963                | 8.619937 | 3.464482  |
| 23            | 6             | 0           | 4.408553                | 6.610540 | 2.686455  |
| 24            | 1             | 0           | 4.055196                | 6.053523 | 1.813471  |
| 25            | 1             | 0           | 4.075256                | 7.649980 | 2.580818  |
| 26            | 6             | 0           | 11.151290               | 6.093187 | 1.313329  |
| 27            | 1             | 0           | 10.616007               | 7.027190 | 1.112101  |
| 28            | 1             | 0           | 12.197477               | 6.336497 | 1.531562  |
| 29            | 1             | 0           | 11.122478               | 5.488574 | 0.400686  |
| 30            | 6             | 0           | 3.781711                | 5.996228 | 3.961078  |
| 31            | 1             | 0           | 4.092353                | 4.954666 | 4.072435  |
| 32            | 1             | 0           | 4.087119                | 6.549795 | 4.855836  |
| 33            | 1             | 0           | 2.688424                | 6.031185 | 3.892751  |

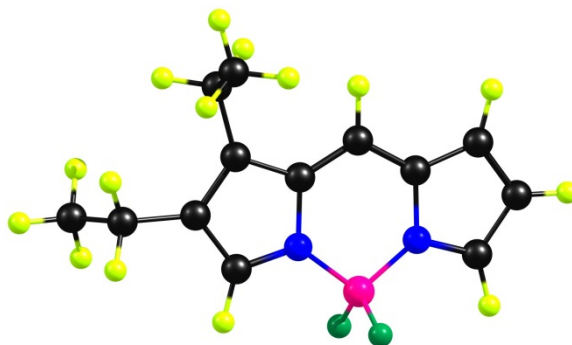

Figure S-25: DFT B3LYP/6-31G(d) optimised ground-state structure of **4.04**

### DFT B3LYP/6-31G(d) optimised ground state structure:

| Center<br>Number | Atomic<br>Number | Atomic<br>Type | Coordinates (Angstroms) |           |          |
|------------------|------------------|----------------|-------------------------|-----------|----------|
|                  |                  |                | X                       | Y         | Z        |
| 1                | 5                | 0              | 6.176484                | 4.280491  | 1.905403 |
| 2                | 9                | 0              | 5.305232                | 4.506281  | 0.857430 |
| 3                | 9                | 0              | 5.542740                | 3.675669  | 2.975026 |
| 4                | 7                | 0              | 6.820030                | 5.640100  | 2.369465 |
| 5                | 7                | 0              | 7.382810                | 3.394303  | 1.425916 |
| 6                | 6                | 0              | 6.165593                | 6.726528  | 2.790668 |
| 7                | 6                | 0              | 7.065466                | 7.746454  | 3.187722 |
| 8                | 6                | 0              | 8.349767                | 7.235055  | 2.986710 |
| 9                | 6                | 0              | 8.185073                | 5.910990  | 2.471150 |
| 10               | 6                | 0              | 9.113354                | 4.962979  | 2.064221 |
| 11               | 6                | 0              | 8.730714                | 3.726076  | 1.543194 |
| 12               | 6                | 0              | 9.498731                | 2.646628  | 1.038506 |
| 13               | 1                | 0              | 10.579690               | 2.614953  | 0.994068 |
| 14               | 6                | 0              | 8.602231                | 1.671129  | 0.618348 |
| 15               | 1                | 0              | 8.830922                | 0.711387  | 0.175858 |
| 16               | 6                | 0              | 7.309342                | 2.172912  | 0.875208 |
| 17               | 1                | 0              | 6.348606                | 1.711589  | 0.688892 |
| 18               | 1                | 0              | 5.082688                | 6.744767  | 2.801525 |
| 19               | 1                | 0              | 10.172562               | 5.191254  | 2.137205 |
| 20               | 6                | 0              | 9.662626                | 7.900657  | 3.290467 |
| 21               | 1                | 0              | 10.424665               | 7.564492  | 2.575979 |
| 22               | 1                | 0              | 9.566258                | 8.982462  | 3.139995 |
| 23               | 6                | 0              | 6.669463                | 9.114349  | 3.676070 |
| 24               | 1                | 0              | 7.451603                | 9.512715  | 4.333500 |
| 25               | 1                | 0              | 5.767736                | 9.031394  | 4.296455 |
| 26               | 6                | 0              | 10.160917               | 7.632118  | 4.724781 |
| 27               | 1                | 0              | 10.300645               | 6.559660  | 4.898421 |
| 28               | 1                | 0              | 11.117794               | 8.135754  | 4.902762 |
| 29               | 1                | 0              | 9.440676                | 7.995833  | 5.465442 |
| 30               | 6                | 0              | 6.405007                | 10.116551 | 2.536564 |
| 31               | 1                | 0              | 6.113909                | 11.094624 | 2.936549 |
| 32               | 1                | 0              | 7.298374                | 10.253669 | 1.917021 |
| 33               | 1                | 0              | 5.600248                | 9.764058  | 1.881980 |

### DFT B3LYP/6-31++G(d,p) optimised ground state structure:

| Center<br>Number | Atomic<br>Number | Atomic<br>Type | Coordinates (Angstroms) |          |          |
|------------------|------------------|----------------|-------------------------|----------|----------|
|                  |                  |                | X                       | Y        | Z        |
| 1                | 5                | 0              | 6.186394                | 4.319727 | 1.822309 |
| 2                | 9                | 0              | 5.393649                | 4.582678 | 0.705644 |
| 3                | 9                | 0              | 5.430518                | 3.725048 | 2.831917 |
| 4                | 7                | 0              | 6.826215                | 5.651060 | 2.347702 |
| 5                | 7                | 0              | 7.385025                | 3.393783 | 1.427846 |
| 6                | 6                | 0              | 6.173136                | 6.728940 | 2.789625 |
| 7                | 6                | 0              | 7.075713                | 7.744013 | 3.188594 |
| 8                | 6                | 0              | 8.357368                | 7.238761 | 2.968955 |
| 9                | 6                | 0              | 8.191604                | 5.921297 | 2.438162 |
| 10               | 6                | 0              | 9.116572                | 4.974315 | 2.032607 |
| 11               | 6                | 0              | 8.730952                | 3.729954 | 1.534730 |
| 12               | 6                | 0              | 9.497141                | 2.633109 | 1.072461 |
| 13               | 1                | 0              | 10.575533               | 2.596627 | 1.033767 |
| 14               | 6                | 0              | 8.600485                | 1.642314 | 0.690645 |
| 15               | 1                | 0              | 8.829163                | 0.667162 | 0.290450 |
| 16               | 6                | 0              | 7.309176                | 2.151571 | 0.925316 |
| 17               | 1                | 0              | 6.351481                | 1.682950 | 0.755174 |
| 18               | 1                | 0              | 5.092422                | 6.746097 | 2.812375 |
| 19               | 1                | 0              | 10.174153               | 5.200809 | 2.099689 |
| 20               | 6                | 0              | 9.669058                | 7.903229 | 3.271616 |
| 21               | 1                | 0              | 10.425684               | 7.572419 | 2.553088 |
| 22               | 1                | 0              | 9.568426                | 8.982597 | 3.125197 |
| 23               | 6                | 0              | 6.680870                | 9.101303 | 3.702130 |
| 24               | 1                | 0              | 7.477189                | 9.498579 | 4.338270 |
| 25               | 1                | 0              | 5.802518                | 8.999766 | 4.348295 |

|    |   |   |           |           |          |
|----|---|---|-----------|-----------|----------|
| 26 | 6 | 0 | 10.174268 | 7.631226  | 4.702268 |
| 27 | 1 | 0 | 10.322667 | 6.561665  | 4.870658 |
| 28 | 1 | 0 | 11.126223 | 8.139681  | 4.878089 |
| 29 | 1 | 0 | 9.456899  | 7.986019  | 5.446272 |
| 30 | 6 | 0 | 6.369950  | 10.112772 | 2.583602 |
| 31 | 1 | 0 | 6.082895  | 11.080925 | 3.003505 |
| 32 | 1 | 0 | 7.239341  | 10.266235 | 1.938676 |
| 33 | 1 | 0 | 5.549270  | 9.761251  | 1.952866 |

DFT mpw1pw91/6-31++G(d,p) optimised ground state structure:

| Center<br>Number | Atomic<br>Number | Atomic<br>Type | Coordinates (Angstroms) |           |          |
|------------------|------------------|----------------|-------------------------|-----------|----------|
|                  |                  |                | X                       | Y         | Z        |
| 1                | 5                | 0              | 6.195447                | 4.330987  | 1.820568 |
| 2                | 9                | 0              | 5.413096                | 4.594702  | 0.705166 |
| 3                | 9                | 0              | 5.439870                | 3.739531  | 2.822910 |
| 4                | 7                | 0              | 6.833231                | 5.655733  | 2.346845 |
| 5                | 7                | 0              | 7.391122                | 3.408639  | 1.432603 |
| 6                | 6                | 0              | 6.181379                | 6.727209  | 2.788169 |
| 7                | 6                | 0              | 7.079592                | 7.740476  | 3.187362 |
| 8                | 6                | 0              | 8.356989                | 7.237858  | 2.966097 |
| 9                | 6                | 0              | 8.190393                | 5.925642  | 2.436840 |
| 10               | 6                | 0              | 9.115056                | 4.982910  | 2.034269 |
| 11               | 6                | 0              | 8.729597                | 3.741445  | 1.539084 |
| 12               | 6                | 0              | 9.494534                | 2.648066  | 1.081261 |
| 13               | 1                | 0              | 10.572621               | 2.611572  | 1.044114 |
| 14               | 6                | 0              | 8.599949                | 1.660292  | 0.701502 |
| 15               | 1                | 0              | 8.827031                | 0.684497  | 0.303052 |
| 16               | 6                | 0              | 7.313645                | 2.171448  | 0.934493 |
| 17               | 1                | 0              | 6.354835                | 1.705324  | 0.765194 |
| 18               | 1                | 0              | 5.100831                | 6.741893  | 2.810345 |
| 19               | 1                | 0              | 10.171930               | 5.210594  | 2.102561 |
| 20               | 6                | 0              | 9.662083                | 7.898977  | 3.269458 |
| 21               | 1                | 0              | 10.418278               | 7.571774  | 2.549879 |
| 22               | 1                | 0              | 9.559460                | 8.978026  | 3.126187 |
| 23               | 6                | 0              | 6.689764                | 9.092004  | 3.699483 |
| 24               | 1                | 0              | 7.492660                | 9.489610  | 4.326171 |
| 25               | 1                | 0              | 5.819450                | 8.991407  | 4.355227 |
| 26               | 6                | 0              | 10.156797               | 7.619748  | 4.692477 |
| 27               | 1                | 0              | 10.301285               | 6.549655  | 4.855323 |
| 28               | 1                | 0              | 11.107654               | 8.124551  | 4.878247 |
| 29               | 1                | 0              | 9.435609                | 7.970205  | 5.433630 |
| 30               | 6                | 0              | 6.370766                | 10.090113 | 2.583755 |
| 31               | 1                | 0              | 6.088091                | 11.061185 | 2.997215 |
| 32               | 1                | 0              | 7.233516                | 10.237284 | 1.930028 |
| 33               | 1                | 0              | 5.545397                | 9.734527  | 1.962987 |

DFT wb97xd/6-31++G(d,p) optimised ground state structure:

| Center<br>Number | Atomic<br>Number | Atomic<br>Type | Coordinates (Angstroms) |          |          |
|------------------|------------------|----------------|-------------------------|----------|----------|
|                  |                  |                | X                       | Y        | Z        |
| 1                | 5                | 0              | 6.191762                | 4.315765 | 1.824000 |
| 2                | 9                | 0              | 5.403012                | 4.576366 | 0.706626 |
| 3                | 9                | 0              | 5.439667                | 3.719009 | 2.832116 |
| 4                | 7                | 0              | 6.824155                | 5.644649 | 2.349224 |
| 5                | 7                | 0              | 7.392307                | 3.399300 | 1.432727 |
| 6                | 6                | 0              | 6.170244                | 6.710006 | 2.805048 |
| 7                | 6                | 0              | 7.067763                | 7.729068 | 3.197199 |
| 8                | 6                | 0              | 8.345233                | 7.239932 | 2.951466 |
| 9                | 6                | 0              | 8.184497                | 5.926579 | 2.422152 |
| 10               | 6                | 0              | 9.114501                | 4.987774 | 2.019283 |
| 11               | 6                | 0              | 8.734024                | 3.737457 | 1.531809 |
| 12               | 6                | 0              | 9.500860                | 2.645007 | 1.073317 |
| 13               | 1                | 0              | 10.581021               | 2.610782 | 1.031906 |
| 14               | 6                | 0              | 8.605839                | 1.651037 | 0.698966 |

|    |   |   |           |           |          |
|----|---|---|-----------|-----------|----------|
| 15 | 1 | 0 | 8.835187  | 0.674371  | 0.299048 |
| 16 | 6 | 0 | 7.317242  | 2.159472  | 0.936704 |
| 17 | 1 | 0 | 6.356474  | 1.691748  | 0.772380 |
| 18 | 1 | 0 | 5.088135  | 6.716737  | 2.841518 |
| 19 | 1 | 0 | 10.172501 | 5.223171  | 2.082617 |
| 20 | 6 | 0 | 9.650754  | 7.913316  | 3.245443 |
| 21 | 1 | 0 | 10.413116 | 7.572830  | 2.536267 |
| 22 | 1 | 0 | 9.545294  | 8.991762  | 3.086572 |
| 23 | 6 | 0 | 6.683151  | 9.082302  | 3.720882 |
| 24 | 1 | 0 | 7.475405  | 9.457650  | 4.378005 |
| 25 | 1 | 0 | 5.787767  | 8.988734  | 4.345566 |
| 26 | 6 | 0 | 10.129326 | 7.650804  | 4.681054 |
| 27 | 1 | 0 | 10.254890 | 6.578525  | 4.858572 |
| 28 | 1 | 0 | 11.086780 | 8.145643  | 4.868272 |
| 29 | 1 | 0 | 9.401291  | 8.024412  | 5.407162 |
| 30 | 6 | 0 | 6.421714  | 10.098867 | 2.601470 |
| 31 | 1 | 0 | 6.149218  | 11.074405 | 3.015444 |
| 32 | 1 | 0 | 7.311552  | 10.227518 | 1.977186 |
| 33 | 1 | 0 | 5.607274  | 9.762884  | 1.952499 |

DFT B3LYP/6-31G(d) optimised 1<sup>st</sup> excited-state structure:

| Center<br>Number | Atomic<br>Number | Atomic<br>Type | Coordinates (Angstroms) |           |           |
|------------------|------------------|----------------|-------------------------|-----------|-----------|
|                  |                  |                | X                       | Y         | Z         |
| 1                | 5                | 0              | 6.252417                | 4.148831  | 2.155820  |
| 2                | 9                | 0              | 5.141310                | 4.308605  | 1.349713  |
| 3                | 9                | 0              | 5.927603                | 3.550440  | 3.363660  |
| 4                | 7                | 0              | 6.850740                | 5.577143  | 2.491271  |
| 5                | 7                | 0              | 7.384762                | 3.407014  | 1.422933  |
| 6                | 6                | 0              | 6.103804                | 6.666129  | 2.867591  |
| 7                | 6                | 0              | 6.951004                | 7.688651  | 3.206376  |
| 8                | 6                | 0              | 8.356378                | 7.149306  | 2.995413  |
| 9                | 6                | 0              | 8.214235                | 5.865896  | 2.554312  |
| 10               | 6                | 0              | 9.190491                | 4.869407  | 2.119321  |
| 11               | 6                | 0              | 8.757113                | 3.704985  | 1.523705  |
| 12               | 6                | 0              | 9.469535                | 2.652175  | 0.867590  |
| 13               | 1                | 0              | 10.544941               | 2.604275  | 0.761988  |
| 14               | 6                | 0              | 8.524063                | 1.759203  | 0.372798  |
| 15               | 1                | 0              | 8.710498                | 0.854694  | -0.190779 |
| 16               | 6                | 0              | 7.256140                | 2.249581  | 0.730689  |
| 17               | 1                | 0              | 6.277700                | 1.831587  | 0.539548  |
| 18               | 1                | 0              | 5.025635                | 6.613988  | 2.870407  |
| 19               | 1                | 0              | 10.247062               | 5.089042  | 2.195567  |
| 20               | 6                | 0              | 9.617490                | 7.890226  | 3.286863  |
| 21               | 1                | 0              | 10.435738               | 7.470448  | 2.691436  |
| 22               | 1                | 0              | 9.511837                | 8.940290  | 2.983185  |
| 23               | 6                | 0              | 6.596869                | 9.071532  | 3.625442  |
| 24               | 1                | 0              | 7.272441                | 9.408150  | 4.423767  |
| 25               | 1                | 0              | 5.582281                | 9.076487  | 4.039487  |
| 26               | 6                | 0              | 10.008350               | 7.843658  | 4.783840  |
| 27               | 1                | 0              | 10.165899               | 6.810846  | 5.109034  |
| 28               | 1                | 0              | 10.933970               | 8.405746  | 4.948262  |
| 29               | 1                | 0              | 9.228411                | 8.279829  | 5.416924  |
| 30               | 6                | 0              | 6.665563                | 10.092144 | 2.460429  |
| 31               | 1                | 0              | 6.398358                | 11.090165 | 2.823906  |
| 32               | 1                | 0              | 7.670126                | 10.143899 | 2.028101  |
| 33               | 1                | 0              | 5.969195                | 9.813509  | 1.663901  |

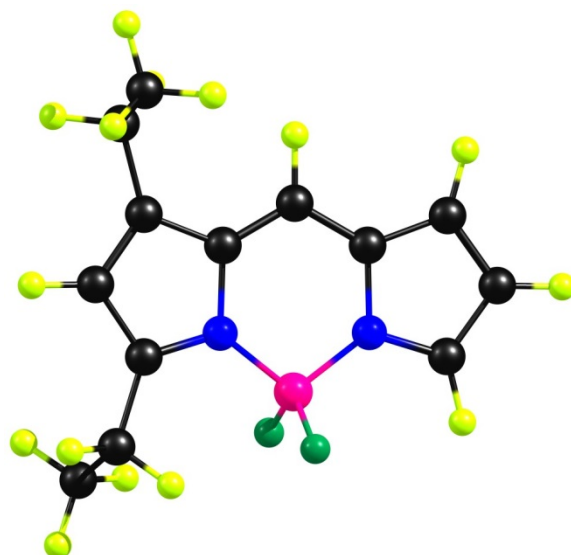

Figure S-26: DFT B3LYP/6-31G(d) optimised ground-state structure of **4.05**

**DFT B3LYP/6-31G(d) optimised ground state structure:**

| Center Number | Atomic Number | Atomic Type | Coordinates (Angstroms) |          |          |
|---------------|---------------|-------------|-------------------------|----------|----------|
|               |               |             | X                       | Y        | Z        |
| 1             | 5             | 0           | 6.179032                | 4.106548 | 1.806407 |
| 2             | 9             | 0           | 5.449258                | 4.309511 | 0.641944 |
| 3             | 9             | 0           | 5.410185                | 3.483609 | 2.777250 |
| 4             | 7             | 0           | 6.725470                | 5.484469 | 2.341223 |
| 5             | 7             | 0           | 7.441043                | 3.234468 | 1.490817 |
| 6             | 6             | 0           | 6.004825                | 6.522781 | 2.806559 |
| 7             | 6             | 0           | 6.880053                | 7.592500 | 3.131358 |
| 8             | 6             | 0           | 8.177689                | 7.192904 | 2.853301 |
| 9             | 6             | 0           | 8.075263                | 5.855698 | 2.353487 |
| 10            | 6             | 0           | 9.058954                | 4.970576 | 1.945471 |
| 11            | 6             | 0           | 8.761140                | 3.672252 | 1.523960 |
| 12            | 6             | 0           | 9.594185                | 2.603021 | 1.115201 |
| 13            | 1             | 0           | 10.673550               | 2.641468 | 1.045190 |
| 14            | 6             | 0           | 8.762186                | 1.521712 | 0.840440 |
| 15            | 1             | 0           | 9.052340                | 0.534748 | 0.507306 |
| 16            | 6             | 0           | 7.443894                | 1.953627 | 1.083933 |
| 17            | 1             | 0           | 6.515622                | 1.407300 | 0.983717 |
| 18            | 1             | 0           | 10.097108               | 5.288518 | 1.963370 |
| 19            | 1             | 0           | 6.564973                | 8.548298 | 3.531290 |
| 20            | 6             | 0           | 9.446824                | 7.961901 | 3.084632 |
| 21            | 1             | 0           | 10.188389               | 7.702659 | 2.318388 |
| 22            | 1             | 0           | 9.241413                | 9.032038 | 2.961655 |
| 23            | 6             | 0           | 4.509970                | 6.512991 | 2.903936 |
| 24            | 1             | 0           | 4.176617                | 5.503378 | 3.159061 |
| 25            | 1             | 0           | 4.216366                | 7.178134 | 3.724775 |
| 26            | 6             | 0           | 10.053311               | 7.720794 | 4.481441 |
| 27            | 1             | 0           | 10.296789               | 6.663070 | 4.629040 |
| 28            | 1             | 0           | 10.971655               | 8.304703 | 4.609615 |
| 29            | 1             | 0           | 9.349455                | 8.012540 | 5.267940 |
| 30            | 6             | 0           | 3.824924                | 6.968957 | 1.597719 |
| 31            | 1             | 0           | 4.078288                | 6.286551 | 0.783395 |
| 32            | 1             | 0           | 2.737224                | 6.970555 | 1.727672 |
| 33            | 1             | 0           | 4.136666                | 7.981633 | 1.318741 |

**DFT B3LYP/6-31++G(d,p) optimised ground state structure:**

| Center | Atomic | Atomic | Coordinates (Angstroms) |  |  |
|--------|--------|--------|-------------------------|--|--|
|--------|--------|--------|-------------------------|--|--|



| Number | Number | Type | X         | Y        | Z        |
|--------|--------|------|-----------|----------|----------|
| 1      | 5      | 0    | 6.198733  | 4.045017 | 1.918423 |
| 2      | 9      | 0    | 5.332274  | 4.176461 | 0.828756 |
| 3      | 9      | 0    | 5.541546  | 3.426268 | 2.985720 |
| 4      | 7      | 0    | 6.730002  | 5.456126 | 2.358391 |
| 5      | 7      | 0    | 7.448818  | 3.207432 | 1.504887 |
| 6      | 6      | 0    | 6.004032  | 6.503259 | 2.787900 |
| 7      | 6      | 0    | 6.875868  | 7.579943 | 3.097168 |
| 8      | 6      | 0    | 8.175059  | 7.173304 | 2.846476 |
| 9      | 6      | 0    | 8.080425  | 5.826126 | 2.375413 |
| 10     | 6      | 0    | 9.063231  | 4.945113 | 1.968453 |
| 11     | 6      | 0    | 8.765195  | 3.651409 | 1.535812 |
| 12     | 6      | 0    | 9.596364  | 2.601512 | 1.082949 |
| 13     | 1      | 0    | 10.671473 | 2.648383 | 0.995521 |
| 14     | 6      | 0    | 8.765816  | 1.526185 | 0.782135 |
| 15     | 1      | 0    | 9.055713  | 0.556061 | 0.410289 |
| 16     | 6      | 0    | 7.450479  | 1.940420 | 1.055584 |
| 17     | 1      | 0    | 6.527045  | 1.391537 | 0.948971 |
| 18     | 1      | 0    | 10.098733 | 5.263942 | 1.981553 |
| 19     | 1      | 0    | 6.556853  | 8.544278 | 3.465439 |
| 20     | 6      | 0    | 9.437528  | 7.951610 | 3.072095 |
| 21     | 1      | 0    | 10.187772 | 7.670259 | 2.326271 |
| 22     | 1      | 0    | 9.229758  | 9.013548 | 2.910757 |
| 23     | 6      | 0    | 4.510761  | 6.502587 | 2.868089 |
| 24     | 1      | 0    | 4.158073  | 5.487718 | 3.056773 |
| 25     | 1      | 0    | 4.217871  | 7.117148 | 3.724886 |
| 26     | 6      | 0    | 10.024781 | 7.759112 | 4.483962 |
| 27     | 1      | 0    | 10.272334 | 6.710960 | 4.669558 |
| 28     | 1      | 0    | 10.935893 | 8.351286 | 4.605059 |
| 29     | 1      | 0    | 9.310715  | 8.072189 | 5.249375 |
| 30     | 6      | 0    | 3.846359  | 7.055205 | 1.589568 |
| 31     | 1      | 0    | 4.091449  | 6.428080 | 0.731636 |
| 32     | 1      | 0    | 2.760196  | 7.064053 | 1.710642 |
| 33     | 1      | 0    | 4.173512  | 8.077385 | 1.381723 |

**DFT mpw1pw91/6-31++G(d,p) optimised ground state structure:**

| Center Number | Atomic Number | Atomic Type | Coordinates (Angstroms) |          |          |
|---------------|---------------|-------------|-------------------------|----------|----------|
|               |               |             | X                       | Y        | Z        |
| 1             | 5             | 0           | 6.204186                | 4.045739 | 1.931690 |
| 2             | 9             | 0           | 5.335261                | 4.172622 | 0.852358 |
| 3             | 9             | 0           | 5.561094                | 3.430165 | 3.000717 |
| 4             | 7             | 0           | 6.733473                | 5.452671 | 2.362481 |
| 5             | 7             | 0           | 7.451066                | 3.215750 | 1.514332 |
| 6             | 6             | 0           | 6.007184                | 6.493454 | 2.785254 |
| 7             | 6             | 0           | 6.870984                | 7.572953 | 3.089654 |
| 8             | 6             | 0           | 8.167192                | 7.169564 | 2.840330 |
| 9             | 6             | 0           | 8.074278                | 5.824567 | 2.377227 |
| 10            | 6             | 0           | 9.057165                | 4.949007 | 1.972369 |
| 11            | 6             | 0           | 8.759864                | 3.657670 | 1.543076 |
| 12            | 6             | 0           | 9.590028                | 2.613128 | 1.091063 |
| 13            | 1             | 0           | 10.664603               | 2.661655 | 1.002701 |
| 14            | 6             | 0           | 8.762140                | 1.540562 | 0.791735 |
| 15            | 1             | 0           | 9.051077                | 0.570845 | 0.419305 |
| 16            | 6             | 0           | 7.451586                | 1.954741 | 1.066845 |
| 17            | 1             | 0           | 6.527412                | 1.407124 | 0.962269 |
| 18            | 1             | 0           | 10.091436               | 5.270601 | 1.984009 |
| 19            | 1             | 0           | 6.548463                | 8.537338 | 3.453599 |
| 20            | 6             | 0           | 9.424761                | 7.944088 | 3.060956 |
| 21            | 1             | 0           | 10.171020               | 7.662809 | 2.312119 |
| 22            | 1             | 0           | 9.216924                | 9.005284 | 2.900608 |
| 23            | 6             | 0           | 4.520475                | 6.483685 | 2.859255 |
| 24            | 1             | 0           | 4.173076                | 5.461640 | 3.012187 |
| 25            | 1             | 0           | 4.220854                | 7.067401 | 3.734223 |
| 26            | 6             | 0           | 10.007539               | 7.746130 | 4.463939 |
| 27            | 1             | 0           | 10.250448               | 6.697165 | 4.645987 |
| 28            | 1             | 0           | 10.919747               | 8.333833 | 4.589378 |
| 29            | 1             | 0           | 9.294071                | 8.057714 | 5.229247 |
| 30            | 6             | 0           | 3.872491                | 7.072847 | 1.600208 |
| 31            | 1             | 0           | 4.128345                | 6.474023 | 0.726045 |

|    |   |   |          |          |          |
|----|---|---|----------|----------|----------|
| 32 | 1 | 0 | 2.785870 | 7.076841 | 1.707394 |
| 33 | 1 | 0 | 4.200548 | 8.100296 | 1.427673 |

DFT wb97xd/6-31++G(d,p) optimised ground state structure:

| Center Number | Atomic Number | Atomic Type | Coordinates (Angstroms) |          |          |
|---------------|---------------|-------------|-------------------------|----------|----------|
|               |               |             | X                       | Y        | Z        |
| 1             | 5             | 0           | 6.202452                | 4.051593 | 1.951922 |
| 2             | 9             | 0           | 5.309269                | 4.160237 | 0.885025 |
| 3             | 9             | 0           | 5.584287                | 3.439957 | 3.043455 |
| 4             | 7             | 0           | 6.727252                | 5.468708 | 2.363034 |
| 5             | 7             | 0           | 7.449216                | 3.229999 | 1.517397 |
| 6             | 6             | 0           | 6.003995                | 6.509994 | 2.786567 |
| 7             | 6             | 0           | 6.868299                | 7.594287 | 3.087547 |
| 8             | 6             | 0           | 8.164111                | 7.190043 | 2.838086 |
| 9             | 6             | 0           | 8.073366                | 5.841847 | 2.378485 |
| 10            | 6             | 0           | 9.058518                | 4.965318 | 1.982942 |
| 11            | 6             | 0           | 8.762695                | 3.668310 | 1.553172 |
| 12            | 6             | 0           | 9.591345                | 2.625957 | 1.094488 |
| 13            | 1             | 0           | 10.668395               | 2.671384 | 1.008356 |
| 14            | 6             | 0           | 8.759078                | 1.555400 | 0.782154 |
| 15            | 1             | 0           | 9.047929                | 0.587802 | 0.398889 |
| 16            | 6             | 0           | 7.447867                | 1.970908 | 1.057875 |
| 17            | 1             | 0           | 6.520003                | 1.427845 | 0.945522 |
| 18            | 1             | 0           | 10.095133               | 5.287418 | 2.001050 |
| 19            | 1             | 0           | 6.545078                | 8.560527 | 3.451914 |
| 20            | 6             | 0           | 9.429864                | 7.956671 | 3.067603 |
| 21            | 1             | 0           | 10.170000               | 7.693365 | 2.303748 |
| 22            | 1             | 0           | 9.225259                | 9.025244 | 2.947680 |
| 23            | 6             | 0           | 4.512220                | 6.503709 | 2.863006 |
| 24            | 1             | 0           | 4.160824                | 5.489242 | 3.064026 |
| 25            | 1             | 0           | 4.213510                | 7.133858 | 3.707001 |
| 26            | 6             | 0           | 10.017479               | 7.699347 | 4.463425 |
| 27            | 1             | 0           | 10.246245               | 6.638416 | 4.601995 |
| 28            | 1             | 0           | 10.938534               | 8.271656 | 4.606911 |
| 29            | 1             | 0           | 9.305587                | 7.991222 | 5.240611 |
| 30            | 6             | 0           | 3.872061                | 7.031994 | 1.568994 |
| 31            | 1             | 0           | 4.131576                | 6.384920 | 0.728713 |
| 32            | 1             | 0           | 2.783457                | 7.047457 | 1.670561 |
| 33            | 1             | 0           | 4.209757                | 8.049278 | 1.348079 |

DFT B3LYP/6-31G(d) optimised 1<sup>st</sup> excited-state structure:

| Center Number | Atomic Number | Atomic Type | Coordinates (Angstroms) |          |          |
|---------------|---------------|-------------|-------------------------|----------|----------|
|               |               |             | X                       | Y        | Z        |
| 1             | 5             | 0           | 6.199934                | 4.195340 | 1.685129 |
| 2             | 9             | 0           | 5.624908                | 4.414171 | 0.436398 |
| 3             | 9             | 0           | 5.319388                | 3.527753 | 2.526240 |
| 4             | 7             | 0           | 6.737535                | 5.496947 | 2.313724 |
| 5             | 7             | 0           | 7.458853                | 3.270475 | 1.478593 |
| 6             | 6             | 0           | 5.988409                | 6.515905 | 2.822546 |
| 7             | 6             | 0           | 6.845635                | 7.583807 | 3.176330 |
| 8             | 6             | 0           | 8.155120                | 7.233249 | 2.876607 |
| 9             | 6             | 0           | 8.095158                | 5.898740 | 2.333309 |
| 10            | 6             | 0           | 9.109144                | 5.072127 | 1.917884 |
| 11            | 6             | 0           | 8.802361                | 3.701835 | 1.523002 |
| 12            | 6             | 0           | 9.587664                | 2.641100 | 1.218493 |
| 13            | 1             | 0           | 10.667760               | 2.620081 | 1.167891 |
| 14            | 6             | 0           | 8.678884                | 1.480519 | 0.976411 |
| 15            | 1             | 0           | 8.984826                | 0.481540 | 0.697110 |
| 16            | 6             | 0           | 7.398460                | 1.938570 | 1.165205 |
| 17            | 1             | 0           | 6.447076                | 1.435673 | 1.089764 |
| 18            | 1             | 0           | 10.139790               | 5.400112 | 1.928016 |
| 19            | 1             | 0           | 6.511423                | 8.520147 | 3.607371 |
| 20            | 6             | 0           | 9.408834                | 8.018310 | 3.120504 |

|    |   |   |           |          |          |
|----|---|---|-----------|----------|----------|
| 21 | 1 | 0 | 10.093430 | 7.901343 | 2.268704 |
| 22 | 1 | 0 | 9.158696  | 9.085376 | 3.166823 |
| 23 | 6 | 0 | 4.494389  | 6.485707 | 2.903091 |
| 24 | 1 | 0 | 4.166403  | 5.474166 | 3.160578 |
| 25 | 1 | 0 | 4.181920  | 7.152095 | 3.716198 |
| 26 | 6 | 0 | 10.145368 | 7.616552 | 4.415087 |
| 27 | 1 | 0 | 10.424422 | 6.557442 | 4.397052 |
| 28 | 1 | 0 | 11.058774 | 8.209050 | 4.543554 |
| 29 | 1 | 0 | 9.507263  | 7.776744 | 5.290751 |
| 30 | 6 | 0 | 3.806464  | 6.923559 | 1.589978 |
| 31 | 1 | 0 | 4.089010  | 6.258631 | 0.770293 |
| 32 | 1 | 0 | 2.717265  | 6.889882 | 1.706922 |
| 33 | 1 | 0 | 4.090095  | 7.946964 | 1.320679 |

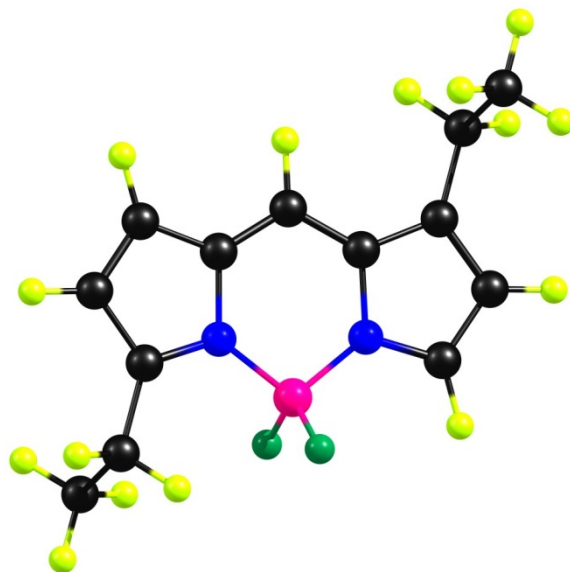

Figure S-27: DFT B3LYP/6-31G(d) optimised ground-state structure of **4.06**

**DFT B3LYP/6-31G(d) optimised ground state structure:**

| Center Number | Atomic Number | Atomic Type | Coordinates (Angstroms) |          |          |
|---------------|---------------|-------------|-------------------------|----------|----------|
|               |               |             | X                       | Y        | Z        |
| 1             | 5             | 0           | 6.087739                | 4.357934 | 1.859609 |
| 2             | 9             | 0           | 5.297618                | 4.549027 | 0.736680 |
| 3             | 9             | 0           | 5.347768                | 3.830913 | 2.910187 |
| 4             | 7             | 0           | 6.722122                | 5.722448 | 2.297195 |
| 5             | 7             | 0           | 7.296215                | 3.404796 | 1.525293 |
| 6             | 6             | 0           | 6.055502                | 6.845157 | 2.604595 |
| 7             | 6             | 0           | 6.952199                | 7.851434 | 3.009708 |
| 8             | 6             | 0           | 8.238051                | 7.314388 | 2.947083 |
| 9             | 6             | 0           | 8.079086                | 5.970578 | 2.494804 |
| 10            | 6             | 0           | 9.011824                | 4.971579 | 2.228854 |
| 11            | 6             | 0           | 8.638675                | 3.721675 | 1.750565 |
| 12            | 6             | 0           | 9.427365                | 2.601259 | 1.380073 |
| 13            | 1             | 0           | 10.507317               | 2.552883 | 1.435315 |
| 14            | 6             | 0           | 8.555094                | 1.625278 | 0.933264 |
| 15            | 1             | 0           | 8.800772                | 0.639122 | 0.561971 |
| 16            | 6             | 0           | 7.238088                | 2.149079 | 1.035606 |
| 17            | 1             | 0           | 10.066805               | 5.173592 | 2.388353 |
| 18            | 1             | 0           | 6.680933                | 8.854138 | 3.313295 |
| 19            | 6             | 0           | 9.537276                | 8.011372 | 3.234760 |
| 20            | 1             | 0           | 10.272084               | 7.292562 | 3.619214 |
| 21            | 1             | 0           | 9.379259                | 8.743705 | 4.035824 |
| 22            | 1             | 0           | 4.976881                | 6.881914 | 2.527963 |
| 23            | 6             | 0           | 5.953557                | 1.450900 | 0.707597 |
| 24            | 1             | 0           | 5.237599                | 2.184512 | 0.326978 |

|    |   |   |           |           |           |
|----|---|---|-----------|-----------|-----------|
| 25 | 1 | 0 | 6.150919  | 0.731179  | -0.095832 |
| 26 | 6 | 0 | 5.344988  | 0.716916  | 1.921592  |
| 27 | 1 | 0 | 6.038572  | -0.031102 | 2.321636  |
| 28 | 1 | 0 | 5.106194  | 1.431866  | 2.712173  |
| 29 | 1 | 0 | 4.423955  | 0.203396  | 1.624658  |
| 30 | 6 | 0 | 10.125376 | 8.729210  | 2.003794  |
| 31 | 1 | 0 | 11.065999 | 9.229530  | 2.260472  |
| 32 | 1 | 0 | 10.324590 | 8.021002  | 1.192154  |
| 33 | 1 | 0 | 9.429506  | 9.483923  | 1.622396  |

**DFT B3LYP/6-31++G(d,p) optimised ground state structure:**

| Center<br>Number | Atomic<br>Number | Atomic<br>Type | Coordinates (Angstroms) |           |           |
|------------------|------------------|----------------|-------------------------|-----------|-----------|
|                  |                  |                | X                       | Y         | Z         |
| 1                | 5                | 0              | 6.094814                | 4.402660  | 1.786552  |
| 2                | 9                | 0              | 5.377829                | 4.629719  | 0.608524  |
| 3                | 9                | 0              | 5.251312                | 3.882920  | 2.773674  |
| 4                | 7                | 0              | 6.732768                | 5.737718  | 2.284233  |
| 5                | 7                | 0              | 7.282383                | 3.411716  | 1.516493  |
| 6                | 6                | 0              | 6.075157                | 6.857119  | 2.619871  |
| 7                | 6                | 0              | 6.982370                | 7.849710  | 3.028408  |
| 8                | 6                | 0              | 8.264066                | 7.307977  | 2.937650  |
| 9                | 6                | 0              | 8.093365                | 5.973861  | 2.467579  |
| 10               | 6                | 0              | 9.015248                | 4.969111  | 2.196148  |
| 11               | 6                | 0              | 8.627529                | 3.720877  | 1.732038  |
| 12               | 6                | 0              | 9.401246                | 2.584004  | 1.386162  |
| 13               | 1                | 0              | 10.477916               | 2.523346  | 1.442830  |
| 14               | 6                | 0              | 8.518343                | 1.607508  | 0.966119  |
| 15               | 1                | 0              | 8.753723                | 0.612077  | 0.621460  |
| 16               | 6                | 0              | 7.207809                | 2.146483  | 1.057733  |
| 17               | 1                | 0              | 10.070852               | 5.160412  | 2.348578  |
| 18               | 1                | 0              | 6.719116                | 8.844549  | 3.354810  |
| 19               | 6                | 0              | 9.566421                | 7.996136  | 3.223366  |
| 20               | 1                | 0              | 10.312159               | 7.263829  | 3.548637  |
| 21               | 1                | 0              | 9.426386                | 8.681966  | 4.064597  |
| 22               | 1                | 0              | 4.997998                | 6.903058  | 2.560125  |
| 23               | 6                | 0              | 5.921502                | 1.449224  | 0.746665  |
| 24               | 1                | 0              | 5.183002                | 2.181315  | 0.416515  |
| 25               | 1                | 0              | 6.101949                | 0.766009  | -0.088939 |
| 26               | 6                | 0              | 5.366043                | 0.655403  | 1.947516  |
| 27               | 1                | 0              | 6.081022                | -0.096773 | 2.291099  |
| 28               | 1                | 0              | 5.140008                | 1.327353  | 2.776310  |
| 29               | 1                | 0              | 4.445211                | 0.142014  | 1.659099  |
| 30               | 6                | 0              | 10.116530               | 8.781632  | 2.017190  |
| 31               | 1                | 0              | 11.058691               | 9.273167  | 2.274995  |
| 32               | 1                | 0              | 10.298262               | 8.120460  | 1.166033  |
| 33               | 1                | 0              | 9.408896                | 9.549604  | 1.695759  |

**DFT mpw1pw91/6-31++G(d,p) optimised ground state structure:**

| Center<br>Number | Atomic<br>Number | Atomic<br>Type | Coordinates (Angstroms) |          |          |
|------------------|------------------|----------------|-------------------------|----------|----------|
|                  |                  |                | X                       | Y        | Z        |
| 1                | 5                | 0              | 6.097704                | 4.417926 | 1.763545 |
| 2                | 9                | 0              | 5.411524                | 4.654226 | 0.576780 |
| 3                | 9                | 0              | 5.236923                | 3.900590 | 2.726384 |
| 4                | 7                | 0              | 6.732618                | 5.741676 | 2.277327 |
| 5                | 7                | 0              | 7.281076                | 3.427618 | 1.513810 |
| 6                | 6                | 0              | 6.076463                | 6.853680 | 2.615883 |
| 7                | 6                | 0              | 6.978791                | 7.843156 | 3.029452 |
| 8                | 6                | 0              | 8.256519                | 7.303061 | 2.937331 |
| 9                | 6                | 0              | 8.084885                | 5.976522 | 2.461835 |
| 10               | 6                | 0              | 9.006633                | 4.976613 | 2.191041 |
| 11               | 6                | 0              | 8.618733                | 3.732283 | 1.727886 |
| 12               | 6                | 0              | 9.388909                | 2.595431 | 1.392078 |
| 13               | 1                | 0              | 10.464953               | 2.532672 | 1.451593 |

|    |   |   |           |           |           |
|----|---|---|-----------|-----------|-----------|
| 14 | 6 | 0 | 8.506056  | 1.621145  | 0.979903  |
| 15 | 1 | 0 | 8.737395  | 0.622221  | 0.643847  |
| 16 | 6 | 0 | 7.202054  | 2.166066  | 1.066801  |
| 17 | 1 | 0 | 10.061413 | 5.168452  | 2.345762  |
| 18 | 1 | 0 | 6.714591  | 8.835755  | 3.360570  |
| 19 | 6 | 0 | 9.555186  | 7.983393  | 3.223279  |
| 20 | 1 | 0 | 10.292157 | 7.250445  | 3.564501  |
| 21 | 1 | 0 | 9.412995  | 8.680230  | 4.053842  |
| 22 | 1 | 0 | 4.999526  | 6.897731  | 2.554410  |
| 23 | 6 | 0 | 5.916104  | 1.477817  | 0.766770  |
| 24 | 1 | 0 | 5.167565  | 2.218172  | 0.483279  |
| 25 | 1 | 0 | 6.075261  | 0.825966  | -0.096900 |
| 26 | 6 | 0 | 5.407328  | 0.647307  | 1.951142  |
| 27 | 1 | 0 | 6.137355  | -0.108384 | 2.249399  |
| 28 | 1 | 0 | 5.203046  | 1.290704  | 2.807107  |
| 29 | 1 | 0 | 4.481957  | 0.135896  | 1.678058  |
| 30 | 6 | 0 | 10.110887 | 8.741783  | 2.013925  |
| 31 | 1 | 0 | 11.053851 | 9.232937  | 2.265166  |
| 32 | 1 | 0 | 10.291142 | 8.066468  | 1.174782  |
| 33 | 1 | 0 | 9.408327  | 9.506607  | 1.677239  |

DFT wb97xd/6-31++G(d,p) optimised ground state structure:

| Center<br>Number | Atomic<br>Number | Atomic<br>Type | Coordinates (Angstroms) |           |           |
|------------------|------------------|----------------|-------------------------|-----------|-----------|
|                  |                  |                | X                       | Y         | Z         |
| 1                | 5                | 0              | 6.081317                | 4.428487  | 1.774162  |
| 2                | 9                | 0              | 5.387073                | 4.675230  | 0.589272  |
| 3                | 9                | 0              | 5.227386                | 3.887495  | 2.736192  |
| 4                | 7                | 0              | 6.705504                | 5.752868  | 2.302529  |
| 5                | 7                | 0              | 7.275338                | 3.452297  | 1.506697  |
| 6                | 6                | 0              | 6.042019                | 6.857815  | 2.654109  |
| 7                | 6                | 0              | 6.940805                | 7.853225  | 3.072264  |
| 8                | 6                | 0              | 8.222675                | 7.321856  | 2.969217  |
| 9                | 6                | 0              | 8.060191                | 5.998778  | 2.482875  |
| 10               | 6                | 0              | 8.993170                | 5.011420  | 2.192404  |
| 11               | 6                | 0              | 8.616510                | 3.767468  | 1.714737  |
| 12               | 6                | 0              | 9.394846                | 2.639677  | 1.359876  |
| 13               | 1                | 0              | 10.473774               | 2.585092  | 1.412458  |
| 14               | 6                | 0              | 8.515652                | 1.661032  | 0.942593  |
| 15               | 1                | 0              | 8.750266                | 0.664569  | 0.595452  |
| 16               | 6                | 0              | 7.206695                | 2.195510  | 1.046071  |
| 17               | 1                | 0              | 10.048765               | 5.215281  | 2.344193  |
| 18               | 1                | 0              | 6.674176                | 8.844563  | 3.411300  |
| 19               | 6                | 0              | 9.527306                | 8.005543  | 3.243822  |
| 20               | 1                | 0              | 10.229536               | 7.298535  | 3.700470  |
| 21               | 1                | 0              | 9.364435                | 8.798515  | 3.980808  |
| 22               | 1                | 0              | 4.962790                | 6.891758  | 2.595667  |
| 23               | 6                | 0              | 5.919848                | 1.491773  | 0.759476  |
| 24               | 1                | 0              | 5.153083                | 2.222955  | 0.495234  |
| 25               | 1                | 0              | 6.073111                | 0.843727  | -0.109834 |
| 26               | 6                | 0              | 5.451204                | 0.650774  | 1.957339  |
| 27               | 1                | 0              | 6.200666                | -0.098298 | 2.230779  |
| 28               | 1                | 0              | 5.265533                | 1.293033  | 2.821063  |
| 29               | 1                | 0              | 4.522068                | 0.130550  | 1.708377  |
| 30               | 6                | 0              | 10.153701               | 8.605302  | 1.976245  |
| 31               | 1                | 0              | 11.100756               | 9.101014  | 2.209204  |
| 32               | 1                | 0              | 10.347394               | 7.828368  | 1.230139  |
| 33               | 1                | 0              | 9.482336                | 9.339952  | 1.522642  |

DFT B3LYP/6-31G(d) optimised 1<sup>st</sup> excited-state structure:

| Center<br>Number | Atomic<br>Number | Atomic<br>Type | Coordinates (Angstroms) |          |          |
|------------------|------------------|----------------|-------------------------|----------|----------|
|                  |                  |                | X                       | Y        | Z        |
| 1                | 5                | 0              | 6.182462                | 4.297485 | 1.889707 |
| 2                | 9                | 0              | 5.334553                | 4.518141 | 0.813830 |

|    |   |   |           |          |           |
|----|---|---|-----------|----------|-----------|
| 3  | 9 | 0 | 5.471851  | 3.888594 | 3.013323  |
| 4  | 7 | 0 | 6.844578  | 5.691760 | 2.257004  |
| 5  | 7 | 0 | 7.340520  | 3.346518 | 1.544618  |
| 6  | 6 | 0 | 6.118497  | 6.848034 | 2.466904  |
| 7  | 6 | 0 | 6.988923  | 7.828427 | 2.833744  |
| 8  | 6 | 0 | 8.370985  | 7.215304 | 2.838514  |
| 9  | 6 | 0 | 8.208806  | 5.914103 | 2.474029  |
| 10 | 6 | 0 | 9.151264  | 4.818718 | 2.258360  |
| 11 | 6 | 0 | 8.705226  | 3.606265 | 1.785661  |
| 12 | 6 | 0 | 9.434709  | 2.432738 | 1.416687  |
| 13 | 1 | 0 | 10.509926 | 2.330672 | 1.475246  |
| 14 | 6 | 0 | 8.511854  | 1.503919 | 0.957379  |
| 15 | 1 | 0 | 8.714468  | 0.507344 | 0.586209  |
| 16 | 6 | 0 | 7.225997  | 2.078053 | 1.044961  |
| 17 | 1 | 0 | 10.206531 | 4.982845 | 2.430650  |
| 18 | 1 | 0 | 6.758086  | 8.854924 | 3.086199  |
| 19 | 6 | 0 | 9.617544  | 7.960211 | 3.166266  |
| 20 | 1 | 0 | 10.459659 | 7.264825 | 3.240992  |
| 21 | 1 | 0 | 9.504716  | 8.426841 | 4.157123  |
| 22 | 1 | 0 | 5.047491  | 6.848907 | 2.340296  |
| 23 | 6 | 0 | 5.913499  | 1.437744 | 0.713121  |
| 24 | 1 | 0 | 5.244338  | 2.187667 | 0.280065  |
| 25 | 1 | 0 | 6.091010  | 0.675244 | -0.054991 |
| 26 | 6 | 0 | 5.225134  | 0.784189 | 1.931710  |
| 27 | 1 | 0 | 5.859284  | 0.005442 | 2.369783  |
| 28 | 1 | 0 | 5.016462  | 1.533024 | 2.699508  |
| 29 | 1 | 0 | 4.278266  | 0.323153 | 1.627927  |
| 30 | 6 | 0 | 9.944210  | 9.066924 | 2.138629  |
| 31 | 1 | 0 | 10.850563 | 9.603514 | 2.438226  |
| 32 | 1 | 0 | 10.107709 | 8.637962 | 1.145116  |
| 33 | 1 | 0 | 9.130806  | 9.796672 | 2.061031  |

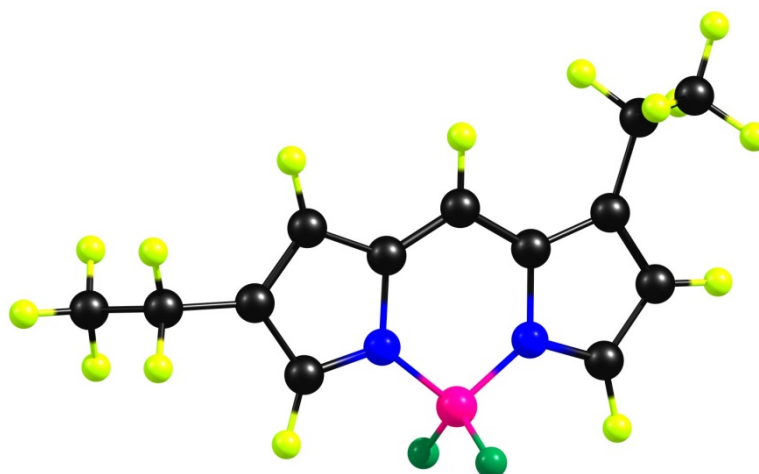

Figure S-28: DFT B3LYP/6-31G(d) optimised ground-state structure of **4.07**

**DFT B3LYP/6-31G(d) optimised ground state structure:**

| Center Number | Atomic Number | Atomic Type | Coordinates (Angstroms) |          |          |
|---------------|---------------|-------------|-------------------------|----------|----------|
|               |               |             | X                       | Y        | Z        |
| 1             | 5             | 0           | 6.088828                | 4.336940 | 1.667368 |
| 2             | 9             | 0           | 5.431620                | 4.680289 | 0.500589 |
| 3             | 9             | 0           | 5.242434                | 3.716761 | 2.565695 |
| 4             | 7             | 0           | 6.723125                | 5.619170 | 2.320732 |
| 5             | 7             | 0           | 7.305544                | 3.395939 | 1.335571 |
| 6             | 6             | 0           | 6.058070                | 6.665672 | 2.827365 |
| 7             | 6             | 0           | 6.959509                | 7.649943 | 3.279609 |
| 8             | 6             | 0           | 8.247502                | 7.178540 | 3.035494 |
| 9             | 6             | 0           | 8.086703                | 5.893658 | 2.431215 |
| 10            | 6             | 0           | 9.024414                | 4.955829 | 2.011867 |

|    |   |   |           |           |           |
|----|---|---|-----------|-----------|-----------|
| 11 | 6 | 0 | 8.652337  | 3.724893  | 1.478216  |
| 12 | 6 | 0 | 9.423827  | 2.624897  | 1.021878  |
| 13 | 1 | 0 | 10.506122 | 2.583709  | 1.007414  |
| 14 | 6 | 0 | 8.542032  | 1.632234  | 0.606013  |
| 15 | 6 | 0 | 7.243405  | 2.160690  | 0.822065  |
| 16 | 1 | 0 | 10.081685 | 5.181477  | 2.115124  |
| 17 | 1 | 0 | 6.687775  | 8.591849  | 3.737945  |
| 18 | 6 | 0 | 9.547528  | 7.882395  | 3.301223  |
| 19 | 1 | 0 | 10.327720 | 7.150944  | 3.547955  |
| 20 | 1 | 0 | 9.434396  | 8.518577  | 4.187282  |
| 21 | 1 | 0 | 4.976223  | 6.669599  | 2.850335  |
| 22 | 1 | 0 | 6.285373  | 1.698013  | 0.620369  |
| 23 | 6 | 0 | 8.863514  | 0.261360  | 0.076332  |
| 24 | 1 | 0 | 8.176053  | 0.012732  | -0.742785 |
| 25 | 1 | 0 | 9.869322  | 0.272154  | -0.361093 |
| 26 | 6 | 0 | 8.787532  | -0.840063 | 1.149796  |
| 27 | 1 | 0 | 7.783786  | -0.898402 | 1.585504  |
| 28 | 1 | 0 | 9.028307  | -1.819600 | 0.721016  |
| 29 | 1 | 0 | 9.491728  | -0.640994 | 1.965120  |
| 30 | 6 | 0 | 10.019617 | 8.746911  | 2.115143  |
| 31 | 1 | 0 | 10.965145 | 9.246877  | 2.353598  |
| 32 | 1 | 0 | 10.171358 | 8.136703  | 1.218191  |
| 33 | 1 | 0 | 9.277822  | 9.514996  | 1.872441  |

DFT B3LYP/6-31++G(d,p) optimised ground state structure:

| Center<br>Number | Atomic<br>Number | Atomic<br>Type | Coordinates (Angstroms) |           |           |
|------------------|------------------|----------------|-------------------------|-----------|-----------|
|                  |                  |                | X                       | Y         | Z         |
| 1                | 5                | 0              | 6.087816                | 4.329609  | 1.700925  |
| 2                | 9                | 0              | 5.368280                | 4.638711  | 0.546812  |
| 3                | 9                | 0              | 5.264347                | 3.714526  | 2.642889  |
| 4                | 7                | 0              | 6.719592                | 5.629682  | 2.303409  |
| 5                | 7                | 0              | 7.291656                | 3.391877  | 1.344498  |
| 6                | 6                | 0              | 6.058730                | 6.698876  | 2.764727  |
| 7                | 6                | 0              | 6.964850                | 7.676741  | 3.215404  |
| 8                | 6                | 0              | 8.249829                | 7.177674  | 3.017888  |
| 9                | 6                | 0              | 8.084230                | 5.882398  | 2.442246  |
| 10               | 6                | 0              | 9.016132                | 4.928642  | 2.054856  |
| 11               | 6                | 0              | 8.637148                | 3.704178  | 1.516277  |
| 12               | 6                | 0              | 9.403372                | 2.602533  | 1.058196  |
| 13               | 1                | 0              | 10.482876               | 2.552433  | 1.058932  |
| 14               | 6                | 0              | 8.517921                | 1.628051  | 0.611182  |
| 15               | 6                | 0              | 7.223073                | 2.165627  | 0.810000  |
| 16               | 1                | 0              | 10.072047               | 5.139249  | 2.177043  |
| 17               | 1                | 0              | 6.696401                | 8.632500  | 3.639600  |
| 18               | 6                | 0              | 9.550673                | 7.869316  | 3.301323  |
| 19               | 1                | 0              | 10.323540               | 7.129989  | 3.534428  |
| 20               | 1                | 0              | 9.435599                | 8.483307  | 4.199712  |
| 21               | 1                | 0              | 4.979070                | 6.724058  | 2.759629  |
| 22               | 1                | 0              | 6.266386                | 1.716909  | 0.583089  |
| 23               | 6                | 0              | 8.834266                | 0.265286  | 0.062056  |
| 24               | 1                | 0              | 8.105265                | 0.009081  | -0.713838 |
| 25               | 1                | 0              | 9.809463                | 0.297401  | -0.433646 |
| 26               | 6                | 0              | 8.843124                | -0.839548 | 1.133736  |
| 27               | 1                | 0              | 7.870510                | -0.918008 | 1.626757  |
| 28               | 1                | 0              | 9.076163                | -1.810862 | 0.688468  |
| 29               | 1                | 0              | 9.589573                | -0.630359 | 1.904558  |
| 30               | 6                | 0              | 10.031231               | 8.759334  | 2.138600  |
| 31               | 1                | 0              | 10.974294               | 9.250060  | 2.394311  |
| 32               | 1                | 0              | 10.187540               | 8.171510  | 1.230522  |
| 33               | 1                | 0              | 9.295361                | 9.533910  | 1.909997  |

DFT mpw1pw91/6-31++G(d,p) optimised ground state structure:

| Center<br>Number | Atomic<br>Number | Atomic<br>Type | Coordinates (Angstroms) |   |   |
|------------------|------------------|----------------|-------------------------|---|---|
|                  |                  |                | X                       | Y | Z |

|    |   |   |           |           |           |
|----|---|---|-----------|-----------|-----------|
| 1  | 5 | 0 | 6.101408  | 4.328946  | 1.697957  |
| 2  | 9 | 0 | 5.391387  | 4.639989  | 0.546622  |
| 3  | 9 | 0 | 5.280082  | 3.713130  | 2.631291  |
| 4  | 7 | 0 | 6.728554  | 5.622133  | 2.303981  |
| 5  | 7 | 0 | 7.303625  | 3.397809  | 1.345327  |
| 6  | 6 | 0 | 6.067143  | 6.682875  | 2.766508  |
| 7  | 6 | 0 | 6.966704  | 7.660858  | 3.217832  |
| 8  | 6 | 0 | 8.248710  | 7.166605  | 3.018032  |
| 9  | 6 | 0 | 8.084293  | 5.877452  | 2.441232  |
| 10 | 6 | 0 | 9.017709  | 4.931193  | 2.052872  |
| 11 | 6 | 0 | 8.641233  | 3.710070  | 1.514581  |
| 12 | 6 | 0 | 9.408152  | 2.614158  | 1.058421  |
| 13 | 1 | 0 | 10.487385 | 2.565861  | 1.059472  |
| 14 | 6 | 0 | 8.526284  | 1.641168  | 0.614097  |
| 15 | 6 | 0 | 7.235404  | 2.176980  | 0.814125  |
| 16 | 1 | 0 | 10.072530 | 5.145458  | 2.174771  |
| 17 | 1 | 0 | 6.695692  | 8.614339  | 3.644500  |
| 18 | 6 | 0 | 9.544433  | 7.855454  | 3.295902  |
| 19 | 1 | 0 | 10.315729 | 7.116533  | 3.532221  |
| 20 | 1 | 0 | 9.430754  | 8.473091  | 4.190898  |
| 21 | 1 | 0 | 4.987596  | 6.703194  | 2.761579  |
| 22 | 1 | 0 | 6.278441  | 1.728331  | 0.589295  |
| 23 | 6 | 0 | 8.840743  | 0.283248  | 0.070019  |
| 24 | 1 | 0 | 8.121856  | 0.033002  | -0.716035 |
| 25 | 1 | 0 | 9.821879  | 0.310856  | -0.412031 |
| 26 | 6 | 0 | 8.826589  | -0.811768 | 1.138791  |
| 27 | 1 | 0 | 7.847484  | -0.881331 | 1.618154  |
| 28 | 1 | 0 | 9.058768  | -1.786096 | 0.702245  |
| 29 | 1 | 0 | 9.562019  | -0.604728 | 1.919388  |
| 30 | 6 | 0 | 10.015455 | 8.731414  | 2.130643  |
| 31 | 1 | 0 | 10.958947 | 9.224855  | 2.374966  |
| 32 | 1 | 0 | 10.165409 | 8.137002  | 1.226849  |
| 33 | 1 | 0 | 9.277961  | 9.502610  | 1.900082  |

DFT wb97xd/6-31++G(d,p) optimised ground state structure:

| Center Number | Atomic Number | Atomic Type | Coordinates (Angstroms) |           |           |
|---------------|---------------|-------------|-------------------------|-----------|-----------|
|               |               |             | X                       | Y         | Z         |
| 1             | 5             | 0           | 6.118411                | 4.287111  | 1.791869  |
| 2             | 9             | 0           | 5.338394                | 4.560443  | 0.672009  |
| 3             | 9             | 0           | 5.370130                | 3.638464  | 2.770333  |
| 4             | 7             | 0           | 6.717112                | 5.610751  | 2.363183  |
| 5             | 7             | 0           | 7.343323                | 3.405019  | 1.386916  |
| 6             | 6             | 0           | 6.034686                | 6.662462  | 2.818154  |
| 7             | 6             | 0           | 6.917248                | 7.668748  | 3.251962  |
| 8             | 6             | 0           | 8.208856                | 7.199114  | 3.049520  |
| 9             | 6             | 0           | 8.071386                | 5.899612  | 2.489475  |
| 10            | 6             | 0           | 9.027394                | 4.977654  | 2.091110  |
| 11            | 6             | 0           | 8.678670                | 3.747994  | 1.547739  |
| 12            | 6             | 0           | 9.467157                | 2.674058  | 1.071648  |
| 13            | 1             | 0           | 10.549203               | 2.646166  | 1.063344  |
| 14            | 6             | 0           | 8.602987                | 1.686341  | 0.622254  |
| 15            | 6             | 0           | 7.299547                | 2.188193  | 0.841589  |
| 16            | 1             | 0           | 10.079393               | 5.220638  | 2.206068  |
| 17            | 1             | 0           | 6.631945                | 8.625109  | 3.667455  |
| 18            | 6             | 0           | 9.499617                | 7.919233  | 3.293679  |
| 19            | 1             | 0           | 10.245954               | 7.220705  | 3.689203  |
| 20            | 1             | 0           | 9.343125                | 8.677086  | 4.067669  |
| 21            | 1             | 0           | 4.953201                | 6.657370  | 2.817735  |
| 22            | 1             | 0           | 6.348937                | 1.718556  | 0.624408  |
| 23            | 6             | 0           | 8.944261                | 0.338802  | 0.055951  |
| 24            | 1             | 0           | 8.360054                | 0.165067  | -0.855166 |
| 25            | 1             | 0           | 9.996560                | 0.336718  | -0.247296 |
| 26            | 6             | 0           | 8.693035                | -0.804678 | 1.047456  |
| 27            | 1             | 0           | 7.641899                | -0.835311 | 1.350774  |
| 28            | 1             | 0           | 8.945015                | -1.771060 | 0.600442  |
| 29            | 1             | 0           | 9.295809                | -0.674124 | 1.951193  |
| 30            | 6             | 0           | 10.044850               | 8.587968  | 2.022787  |
| 31            | 1             | 0           | 10.988550               | 9.101000  | 2.229892  |
| 32            | 1             | 0           | 10.221906               | 7.848375  | 1.235944  |



33                    1                    0                    9.331743                    9.321108                    1.635291

---

**DFT B3LYP/6-31G(d) optimised 1<sup>st</sup> excited-state structure:**

---

| Center Number | Atomic Number | Atomic Type | Coordinates (Angstroms) |           |           |
|---------------|---------------|-------------|-------------------------|-----------|-----------|
|               |               |             | X                       | Y         | Z         |
| 1             | 5             | 0           | 6.022488                | 4.278459  | 2.136601  |
| 2             | 9             | 0           | 4.986122                | 4.369519  | 1.226785  |
| 3             | 9             | 0           | 5.614250                | 3.683843  | 3.321119  |
| 4             | 7             | 0           | 6.684588                | 5.650531  | 2.374885  |
| 5             | 7             | 0           | 7.175006                | 3.390396  | 1.526713  |
| 6             | 6             | 0           | 6.036602                | 6.812058  | 2.613944  |
| 7             | 6             | 0           | 6.952186                | 7.802621  | 3.014888  |
| 8             | 6             | 0           | 8.225181                | 7.237387  | 3.027832  |
| 9             | 6             | 0           | 8.060812                | 5.868192  | 2.603573  |
| 10            | 6             | 0           | 8.982727                | 4.880082  | 2.358804  |
| 11            | 6             | 0           | 8.540626                | 3.634469  | 1.728875  |
| 12            | 6             | 0           | 9.229153                | 2.611098  | 1.164990  |
| 13            | 1             | 0           | 10.304158               | 2.490186  | 1.126009  |
| 14            | 6             | 0           | 8.222626                | 1.667883  | 0.562823  |
| 15            | 6             | 0           | 6.995069                | 2.230811  | 0.817786  |
| 16            | 1             | 0           | 10.037709               | 5.032553  | 2.543481  |
| 17            | 1             | 0           | 6.698890                | 8.824655  | 3.267598  |
| 18            | 6             | 0           | 9.534114                | 7.904778  | 3.327534  |
| 19            | 1             | 0           | 10.175587               | 7.224235  | 3.904701  |
| 20            | 1             | 0           | 9.353044                | 8.773739  | 3.972158  |
| 21            | 1             | 0           | 4.962141                | 6.871285  | 2.509401  |
| 22            | 1             | 0           | 6.001605                | 1.889238  | 0.569900  |
| 23            | 6             | 0           | 8.543244                | 0.393946  | -0.128089 |
| 24            | 1             | 0           | 7.632226                | -0.028525 | -0.565202 |
| 25            | 1             | 0           | 9.232603                | 0.601776  | -0.962903 |
| 26            | 6             | 0           | 9.212972                | -0.649761 | 0.797097  |
| 27            | 1             | 0           | 8.545234                | -0.920799 | 1.620480  |
| 28            | 1             | 0           | 9.450973                | -1.555107 | 0.229170  |
| 29            | 1             | 0           | 10.143522               | -0.265557 | 1.228347  |
| 30            | 6             | 0           | 10.295431               | 8.362999  | 2.066561  |
| 31            | 1             | 0           | 11.248105               | 8.833905  | 2.335979  |
| 32            | 1             | 0           | 10.507652               | 7.515806  | 1.405304  |
| 33            | 1             | 0           | 9.703709                | 9.087992  | 1.497446  |

---

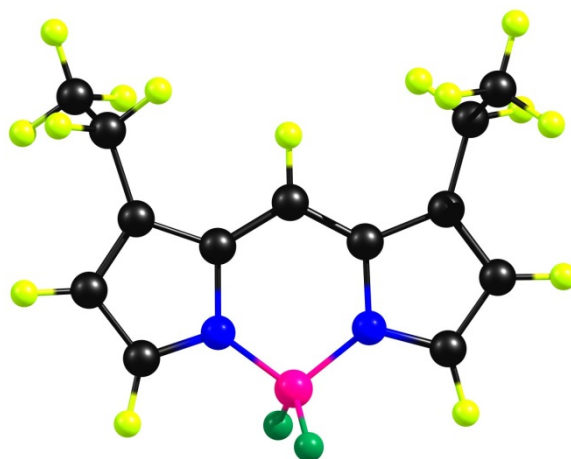

Figure S-29: DFT B3LYP/6-31G(d) optimised ground-state structure of **4.08**

**DFT B3LYP/6-31G(d) optimised ground state structure:**

---

| Center<br>Number | Atomic<br>Number | Atomic<br>Type | Coordinates (Angstroms) |          |          |
|------------------|------------------|----------------|-------------------------|----------|----------|
|                  |                  |                | X                       | Y        | Z        |
| 1                | 5                | 0              | 6.174291                | 4.207037 | 2.050197 |
| 2                | 9                | 0              | 5.263754                | 4.306832 | 1.016184 |
| 3                | 9                | 0              | 5.610970                | 3.624572 | 3.171056 |
| 4                | 7                | 0              | 6.736785                | 5.629355 | 2.414425 |
| 5                | 7                | 0              | 7.426012                | 3.373675 | 1.590210 |
| 6                | 6                | 0              | 6.020442                | 6.704169 | 2.769236 |
| 7                | 6                | 0              | 6.872623                | 7.779704 | 3.089595 |
| 8                | 6                | 0              | 8.183003                | 7.337181 | 2.920674 |
| 9                | 6                | 0              | 8.085280                | 5.977573 | 2.493196 |
| 10               | 6                | 0              | 9.067951                | 5.053254 | 2.152331 |
| 11               | 6                | 0              | 8.757755                | 3.773053 | 1.704260 |
| 12               | 6                | 0              | 9.595738                | 2.706009 | 1.256474 |
| 13               | 6                | 0              | 8.735267                | 1.678951 | 0.874661 |
| 14               | 6                | 0              | 7.418182                | 2.128880 | 1.095849 |
| 15               | 1                | 0              | 10.111164               | 5.346423 | 2.222323 |
| 16               | 1                | 0              | 6.554462                | 8.764329 | 3.406522 |
| 17               | 6                | 0              | 9.447470                | 8.131142 | 3.086213 |
| 18               | 1                | 0              | 10.267403               | 7.471848 | 3.398519 |
| 19               | 1                | 0              | 9.311052                | 8.853905 | 3.899851 |
| 20               | 1                | 0              | 4.939238                | 6.662786 | 2.784260 |
| 21               | 1                | 0              | 6.482776                | 1.614387 | 0.919092 |
| 22               | 1                | 0              | 9.013466                | 0.713164 | 0.473413 |
| 23               | 6                | 0              | 11.097856               | 2.694319 | 1.249735 |
| 24               | 1                | 0              | 11.481147               | 3.704826 | 1.058477 |
| 25               | 1                | 0              | 11.446746               | 2.072988 | 0.416066 |
| 26               | 6                | 0              | 9.860749                | 8.884190 | 1.806177 |
| 27               | 1                | 0              | 10.781774               | 9.454157 | 1.972912 |
| 28               | 1                | 0              | 10.033609               | 8.188485 | 0.977769 |
| 29               | 1                | 0              | 9.077535                | 9.583193 | 1.494474 |
| 30               | 6                | 0              | 11.703273               | 2.162752 | 2.564173 |
| 31               | 1                | 0              | 12.797976               | 2.163105 | 2.513617 |
| 32               | 1                | 0              | 11.399381               | 2.780311 | 3.416396 |
| 33               | 1                | 0              | 11.369998               | 1.138421 | 2.761080 |

**DFT B3LYP/6-31++G(d,p) optimised ground state structure:**

| Center<br>Number | Atomic<br>Number | Atomic<br>Type | Coordinates (Angstroms) |          |          |
|------------------|------------------|----------------|-------------------------|----------|----------|
|                  |                  |                | X                       | Y        | Z        |
| 1                | 5                | 0              | 6.183169                | 4.241781 | 1.961613 |
| 2                | 9                | 0              | 5.367472                | 4.397560 | 0.840907 |
| 3                | 9                | 0              | 5.471890                | 3.653120 | 3.007163 |
| 4                | 7                | 0              | 6.748787                | 5.631083 | 2.411154 |
| 5                | 7                | 0              | 7.430637                | 3.366461 | 1.601310 |
| 6                | 6                | 0              | 6.037543                | 6.692713 | 2.810958 |
| 7                | 6                | 0              | 6.893957                | 7.763322 | 3.128256 |
| 8                | 6                | 0              | 8.199964                | 7.332096 | 2.909377 |
| 9                | 6                | 0              | 8.097467                | 5.982433 | 2.457997 |
| 10               | 6                | 0              | 9.075431                | 5.061691 | 2.103980 |
| 11               | 6                | 0              | 8.761319                | 3.774667 | 1.686360 |
| 12               | 6                | 0              | 9.595892                | 2.690654 | 1.281089 |
| 13               | 6                | 0              | 8.735290                | 1.645235 | 0.955545 |
| 14               | 6                | 0              | 7.420392                | 2.100308 | 1.165972 |
| 15               | 1                | 0              | 10.116616               | 5.356852 | 2.155232 |
| 16               | 1                | 0              | 6.580132                | 8.734508 | 3.480168 |
| 17               | 6                | 0              | 9.461809                | 8.129230 | 3.063571 |
| 18               | 1                | 0              | 10.297894               | 7.463028 | 3.298795 |
| 19               | 1                | 0              | 9.354515                | 8.798028 | 3.923091 |
| 20               | 1                | 0              | 4.959511                | 6.648430 | 2.857912 |
| 21               | 1                | 0              | 6.488287                | 1.574751 | 1.020065 |
| 22               | 1                | 0              | 9.009982                | 0.662961 | 0.601691 |
| 23               | 6                | 0              | 11.096199               | 2.676547 | 1.262860 |
| 24               | 1                | 0              | 11.476986               | 3.687708 | 1.087507 |
| 25               | 1                | 0              | 11.433657               | 2.072971 | 0.414689 |
| 26               | 6                | 0              | 9.810329                | 8.962500 | 1.814993 |
| 27               | 1                | 0              | 10.728786               | 9.533252 | 1.977260 |
| 28               | 1                | 0              | 9.956341                | 8.321730 | 0.941637 |
| 29               | 1                | 0              | 9.008995                | 9.666867 | 1.579601 |
| 30               | 6                | 0              | 11.714219               | 2.117314 | 2.559033 |

|    |   |   |           |          |          |
|----|---|---|-----------|----------|----------|
| 31 | 1 | 0 | 12.805842 | 2.116386 | 2.495711 |
| 32 | 1 | 0 | 11.422978 | 2.716940 | 3.425223 |
| 33 | 1 | 0 | 11.382837 | 1.091847 | 2.738699 |

DFT mpw1pw91/6-31++G(d,p) optimised ground state structure:

| Center<br>Number | Atomic<br>Number | Atomic<br>Type | Coordinates (Angstroms) |          |          |
|------------------|------------------|----------------|-------------------------|----------|----------|
|                  |                  |                | X                       | Y        | Z        |
| 1                | 5                | 0              | 6.194831                | 4.245037 | 1.961611 |
| 2                | 9                | 0              | 5.384164                | 4.404134 | 0.846190 |
| 3                | 9                | 0              | 5.488937                | 3.656237 | 3.001651 |
| 4                | 7                | 0              | 6.759738                | 5.627361 | 2.412700 |
| 5                | 7                | 0              | 7.438247                | 3.375046 | 1.600336 |
| 6                | 6                | 0              | 6.050618                | 6.682839 | 2.812297 |
| 7                | 6                | 0              | 6.902664                | 7.751450 | 3.130733 |
| 8                | 6                | 0              | 8.204585                | 7.321166 | 2.911769 |
| 9                | 6                | 0              | 8.100164                | 5.977443 | 2.459767 |
| 10               | 6                | 0              | 9.076814                | 5.061912 | 2.103859 |
| 11               | 6                | 0              | 8.761286                | 3.780047 | 1.684408 |
| 12               | 6                | 0              | 9.594472                | 2.702062 | 1.278718 |
| 13               | 6                | 0              | 8.736880                | 1.659544 | 0.953537 |
| 14               | 6                | 0              | 7.426594                | 2.115188 | 1.165420 |
| 15               | 1                | 0              | 10.117797               | 5.357027 | 2.155086 |
| 16               | 1                | 0              | 6.588260                | 8.721550 | 3.483907 |
| 17               | 6                | 0              | 9.462960                | 8.111797 | 3.062095 |
| 18               | 1                | 0              | 10.295348               | 7.444588 | 3.304338 |
| 19               | 1                | 0              | 9.356147                | 8.786322 | 3.916072 |
| 20               | 1                | 0              | 4.972880                | 6.636199 | 2.858698 |
| 21               | 1                | 0              | 6.493468                | 1.591752 | 1.020030 |
| 22               | 1                | 0              | 9.010670                | 0.677865 | 0.598545 |
| 23               | 6                | 0              | 11.088085               | 2.691558 | 1.264074 |
| 24               | 1                | 0              | 11.465892               | 3.701590 | 1.080151 |
| 25               | 1                | 0              | 11.428546               | 2.082149 | 0.422429 |
| 26               | 6                | 0              | 9.808214                | 8.926538 | 1.811599 |
| 27               | 1                | 0              | 10.726662               | 9.498130 | 1.963905 |
| 28               | 1                | 0              | 9.950452                | 8.276725 | 0.945428 |
| 29               | 1                | 0              | 9.007298                | 9.627979 | 1.570200 |
| 30               | 6                | 0              | 11.693271               | 2.147952 | 2.562151 |
| 31               | 1                | 0              | 12.784428               | 2.145949 | 2.508918 |
| 32               | 1                | 0              | 11.394657               | 2.754554 | 3.419824 |
| 33               | 1                | 0              | 11.360098               | 1.125282 | 2.748972 |

DFT wb97xd/6-31++G(d,p) optimised ground state structure:

| Center<br>Number | Atomic<br>Number | Atomic<br>Type | Coordinates (Angstroms) |          |          |
|------------------|------------------|----------------|-------------------------|----------|----------|
|                  |                  |                | X                       | Y        | Z        |
| 1                | 5                | 0              | 6.170241                | 4.236628 | 1.961101 |
| 2                | 9                | 0              | 5.350112                | 4.419287 | 0.851076 |
| 3                | 9                | 0              | 5.470962                | 3.622388 | 2.996403 |
| 4                | 7                | 0              | 6.736219                | 5.611688 | 2.438854 |
| 5                | 7                | 0              | 7.413982                | 3.375612 | 1.572348 |
| 6                | 6                | 0              | 6.028372                | 6.658585 | 2.865016 |
| 7                | 6                | 0              | 6.883972                | 7.723068 | 3.203101 |
| 8                | 6                | 0              | 8.185431                | 7.296318 | 2.969436 |
| 9                | 6                | 0              | 8.080616                | 5.963068 | 2.487924 |
| 10               | 6                | 0              | 9.057429                | 5.056728 | 2.103077 |
| 11               | 6                | 0              | 8.740837                | 3.782998 | 1.654630 |
| 12               | 6                | 0              | 9.572592                | 2.715780 | 1.219170 |
| 13               | 6                | 0              | 8.715895                | 1.676009 | 0.879383 |
| 14               | 6                | 0              | 7.402557                | 2.124407 | 1.110816 |
| 15               | 1                | 0              | 10.101223               | 5.353216 | 2.154402 |
| 16               | 1                | 0              | 6.574136                | 8.688295 | 3.578780 |
| 17               | 6                | 0              | 9.452582                | 8.080387 | 3.126514 |
| 18               | 1                | 0              | 10.234171               | 7.444844 | 3.559048 |
| 19               | 1                | 0              | 9.280693                | 8.889094 | 3.843723 |

|    |   |   |           |          |          |
|----|---|---|-----------|----------|----------|
| 20 | 1 | 0 | 4.949267  | 6.607550 | 2.914780 |
| 21 | 1 | 0 | 6.466793  | 1.603122 | 0.961976 |
| 22 | 1 | 0 | 8.993986  | 0.701765 | 0.502143 |
| 23 | 6 | 0 | 11.070811 | 2.717211 | 1.198072 |
| 24 | 1 | 0 | 11.438390 | 3.679173 | 0.822045 |
| 25 | 1 | 0 | 11.414595 | 1.957330 | 0.489315 |
| 26 | 6 | 0 | 9.948387  | 8.671620 | 1.798390 |
| 27 | 1 | 0 | 10.863184 | 9.251870 | 1.950942 |
| 28 | 1 | 0 | 10.160267 | 7.881535 | 1.071469 |
| 29 | 1 | 0 | 9.191379  | 9.328961 | 1.361524 |
| 30 | 6 | 0 | 11.680050 | 2.439864 | 2.580533 |
| 31 | 1 | 0 | 12.772669 | 2.429817 | 2.526690 |
| 32 | 1 | 0 | 11.379006 | 3.204623 | 3.303070 |
| 33 | 1 | 0 | 11.344320 | 1.472133 | 2.963667 |

DFT B3LYP/6-31G(d) optimised 1<sup>st</sup> excited-state structure:

| Center Number | Atomic Number | Atomic Type | Coordinates (Angstroms) |          |          |
|---------------|---------------|-------------|-------------------------|----------|----------|
|               |               |             | X                       | Y        | Z        |
| 1             | 5             | 0           | 6.243242                | 4.216165 | 2.242475 |
| 2             | 9             | 0           | 5.231153                | 4.096692 | 1.310411 |
| 3             | 9             | 0           | 5.895259                | 3.645991 | 3.457271 |
| 4             | 7             | 0           | 6.723470                | 5.667243 | 2.386172 |
| 5             | 7             | 0           | 7.510574                | 3.415811 | 1.716910 |
| 6             | 6             | 0           | 5.930522                | 6.750366 | 2.581110 |
| 7             | 6             | 0           | 6.716418                | 7.869980 | 2.889462 |
| 8             | 6             | 0           | 8.055050                | 7.472731 | 2.889710 |
| 9             | 6             | 0           | 8.059864                | 6.071577 | 2.558648 |
| 10            | 6             | 0           | 9.102690                | 5.193912 | 2.363772 |
| 11            | 6             | 0           | 8.834782                | 3.845014 | 1.861675 |
| 12            | 6             | 0           | 9.649616                | 2.855453 | 1.403070 |
| 13            | 6             | 0           | 8.739156                | 1.739984 | 0.942693 |
| 14            | 6             | 0           | 7.460244                | 2.157844 | 1.150034 |
| 15            | 1             | 0           | 10.126712               | 5.509072 | 2.512082 |
| 16            | 1             | 0           | 6.340728                | 8.865867 | 3.087860 |
| 17            | 6             | 0           | 9.271843                | 8.322449 | 3.104104 |
| 18            | 1             | 0           | 10.014395               | 7.768449 | 3.695363 |
| 19            | 1             | 0           | 8.996125                | 9.198144 | 3.704649 |
| 20            | 1             | 0           | 4.855667                | 6.663190 | 2.505458 |
| 21            | 1             | 0           | 6.509575                | 1.682480 | 0.966708 |
| 22            | 1             | 0           | 9.066619                | 0.796486 | 0.526433 |
| 23            | 6             | 0           | 11.135774               | 2.804629 | 1.335347 |
| 24            | 1             | 0           | 11.555009               | 3.787195 | 1.574342 |
| 25            | 1             | 0           | 11.436524               | 2.575316 | 0.301214 |
| 26            | 6             | 0           | 9.929659                | 8.798145 | 1.792293 |
| 27            | 1             | 0           | 10.821195               | 9.402220 | 1.998315 |
| 28            | 1             | 0           | 10.228905               | 7.946243 | 1.171961 |
| 29            | 1             | 0           | 9.232190                | 9.405923 | 1.205928 |
| 30            | 6             | 0           | 11.745466               | 1.735872 | 2.270110 |
| 31            | 1             | 0           | 12.834953               | 1.718323 | 2.161676 |
| 32            | 1             | 0           | 11.504475               | 1.951537 | 3.315637 |
| 33            | 1             | 0           | 11.367273               | 0.734673 | 2.036525 |

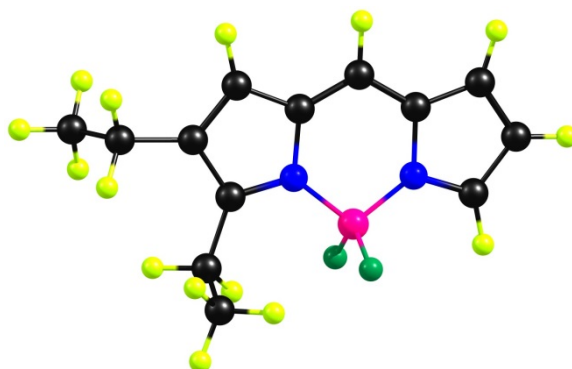

Figure S-30: DFT B3LYP/6-31G(d) optimised ground-state structure of **4.09**

**DFT B3LYP/6-31G(d) optimised ground state structure:**

| Center<br>Number | Atomic<br>Number | Atomic<br>Type | Coordinates (Angstroms) |           |          |
|------------------|------------------|----------------|-------------------------|-----------|----------|
|                  |                  |                | X                       | Y         | Z        |
| 1                | 5                | 0              | 6.152957                | 4.097094  | 1.850546 |
| 2                | 9                | 0              | 5.279750                | 4.218815  | 0.781120 |
| 3                | 9                | 0              | 5.556802                | 3.431891  | 2.914012 |
| 4                | 7                | 0              | 6.644452                | 5.519950  | 2.321683 |
| 5                | 7                | 0              | 7.436900                | 3.322468  | 1.399102 |
| 6                | 6                | 0              | 5.884874                | 6.556038  | 2.725997 |
| 7                | 6                | 0              | 6.724068                | 7.644639  | 3.129582 |
| 8                | 6                | 0              | 8.029093                | 7.218484  | 2.950726 |
| 9                | 6                | 0              | 7.986379                | 5.892760  | 2.443929 |
| 10               | 6                | 0              | 9.005751                | 5.031170  | 2.071857 |
| 11               | 6                | 0              | 8.748574                | 3.762488  | 1.547651 |
| 12               | 6                | 0              | 9.613819                | 2.749437  | 1.068501 |
| 13               | 6                | 0              | 8.809656                | 1.701552  | 0.630355 |
| 14               | 6                | 0              | 7.475682                | 2.095314  | 0.852375 |
| 15               | 1                | 0              | 10.035625               | 5.358529  | 2.179199 |
| 16               | 1                | 0              | 6.560496                | 1.556752  | 0.645862 |
| 17               | 1                | 0              | 9.127707                | 0.762740  | 0.198256 |
| 18               | 1                | 0              | 10.694476               | 2.805968  | 1.050545 |
| 19               | 1                | 0              | 8.934018                | 7.779769  | 3.149722 |
| 20               | 6                | 0              | 6.256267                | 8.993324  | 3.606509 |
| 21               | 1                | 0              | 5.348848                | 8.880970  | 4.213217 |
| 22               | 1                | 0              | 7.016361                | 9.418007  | 4.273694 |
| 23               | 6                | 0              | 4.387670                | 6.497216  | 2.773470 |
| 24               | 1                | 0              | 4.032318                | 5.877622  | 1.945816 |
| 25               | 1                | 0              | 3.992226                | 7.507917  | 2.620320 |
| 26               | 6                | 0              | 3.854037                | 5.930515  | 4.107228 |
| 27               | 1                | 0              | 4.200865                | 4.903828  | 4.243447 |
| 28               | 1                | 0              | 4.190536                | 6.530782  | 4.960121 |
| 29               | 1                | 0              | 2.758577                | 5.931980  | 4.101529 |
| 30               | 6                | 0              | 5.980526                | 9.986562  | 2.461745 |
| 31               | 1                | 0              | 5.205438                | 9.609744  | 1.785064 |
| 32               | 1                | 0              | 5.644931                | 10.952298 | 2.856694 |
| 33               | 1                | 0              | 6.884426                | 10.156335 | 1.866492 |

**DFT B3LYP/6-31++G(d,p) optimised ground state structure:**

| Center<br>Number | Atomic<br>Number | Atomic<br>Type | Coordinates (Angstroms) |          |          |
|------------------|------------------|----------------|-------------------------|----------|----------|
|                  |                  |                | X                       | Y        | Z        |
| 1                | 5                | 0              | 6.159509                | 4.118336 | 1.757383 |
| 2                | 9                | 0              | 5.359458                | 4.290391 | 0.624679 |
| 3                | 9                | 0              | 5.449912                | 3.441164 | 2.753717 |
| 4                | 7                | 0              | 6.640789                | 5.515165 | 2.295309 |
| 5                | 7                | 0              | 7.444822                | 3.315802 | 1.384050 |
| 6                | 6                | 0              | 5.875926                | 6.537769 | 2.720119 |
| 7                | 6                | 0              | 6.710409                | 7.629178 | 3.122238 |
| 8                | 6                | 0              | 8.015553                | 7.217726 | 2.924417 |
| 9                | 6                | 0              | 7.980151                | 5.896880 | 2.406040 |
| 10               | 6                | 0              | 9.002401                | 5.043182 | 2.034994 |
| 11               | 6                | 0              | 8.751291                | 3.767473 | 1.528065 |
| 12               | 6                | 0              | 9.623100                | 2.745874 | 1.086624 |
| 13               | 6                | 0              | 8.827095                | 1.680449 | 0.677404 |
| 14               | 6                | 0              | 7.491433                | 2.071720 | 0.876808 |
| 15               | 1                | 0              | 10.028480               | 5.375876 | 2.139214 |
| 16               | 1                | 0              | 6.583737                | 1.521310 | 0.680467 |
| 17               | 1                | 0              | 9.152483                | 0.731322 | 0.281570 |
| 18               | 1                | 0              | 10.701088               | 2.804833 | 1.077547 |
| 19               | 1                | 0              | 8.916447                | 7.781478 | 3.121208 |
| 20               | 6                | 0              | 6.237952                | 8.968465 | 3.616277 |
| 21               | 1                | 0              | 5.322777                | 8.844979 | 4.203571 |
| 22               | 1                | 0              | 6.985865                | 9.375834 | 4.303560 |

|    |   |   |          |           |          |
|----|---|---|----------|-----------|----------|
| 23 | 6 | 0 | 4.382656 | 6.470279  | 2.788621 |
| 24 | 1 | 0 | 4.016242 | 5.808590  | 2.002579 |
| 25 | 1 | 0 | 3.981798 | 7.467570  | 2.585729 |
| 26 | 6 | 0 | 3.868105 | 5.979755  | 4.159071 |
| 27 | 1 | 0 | 4.211869 | 4.963119  | 4.352393 |
| 28 | 1 | 0 | 4.213468 | 6.625171  | 4.970905 |
| 29 | 1 | 0 | 2.775166 | 5.981263  | 4.166335 |
| 30 | 6 | 0 | 5.983589 | 9.984057  | 2.487059 |
| 31 | 1 | 0 | 5.224035 | 9.621594  | 1.789387 |
| 32 | 1 | 0 | 5.639845 | 10.939032 | 2.894293 |
| 33 | 1 | 0 | 6.896653 | 10.167321 | 1.914735 |

DFT mpw1pw91/6-31++G(d,p) optimised ground state structure:

| Center Number | Atomic Number | Atomic Type | Coordinates (Angstroms) |           |          |
|---------------|---------------|-------------|-------------------------|-----------|----------|
|               |               |             | X                       | Y         | Z        |
| 1             | 5             | 0           | 6.158208                | 4.133550  | 1.746837 |
| 2             | 9             | 0           | 5.375314                | 4.316234  | 0.611904 |
| 3             | 9             | 0           | 5.439541                | 3.459857  | 2.729221 |
| 4             | 7             | 0           | 6.642892                | 5.518159  | 2.292322 |
| 5             | 7             | 0           | 7.438405                | 3.329379  | 1.383622 |
| 6             | 6             | 0           | 5.881241                | 6.533533  | 2.717534 |
| 7             | 6             | 0           | 6.710156                | 7.621133  | 3.124144 |
| 8             | 6             | 0           | 8.011946                | 7.212133  | 2.927088 |
| 9             | 6             | 0           | 7.974337                | 5.896916  | 2.405721 |
| 10            | 6             | 0           | 8.993478                | 5.045024  | 2.036432 |
| 11            | 6             | 0           | 8.738694                | 3.773782  | 1.529442 |
| 12            | 6             | 0           | 9.606910                | 2.753642  | 1.092761 |
| 13            | 6             | 0           | 8.810607                | 1.693886  | 0.683228 |
| 14            | 6             | 0           | 7.480490                | 2.090742  | 0.879320 |
| 15            | 1             | 0           | 10.019720               | 5.374704  | 2.142778 |
| 16            | 1             | 0           | 6.570380                | 1.545197  | 0.681742 |
| 17            | 1             | 0           | 9.132573                | 0.743487  | 0.288693 |
| 18            | 1             | 0           | 10.684737               | 2.809746  | 1.087107 |
| 19            | 1             | 0           | 8.912984                | 7.774111  | 3.126215 |
| 20            | 6             | 0           | 6.230584                | 8.950704  | 3.616339 |
| 21            | 1             | 0           | 5.310944                | 8.819396  | 4.193889 |
| 22            | 1             | 0           | 6.968901                | 9.358748  | 4.312159 |
| 23            | 6             | 0           | 4.395255                | 6.464090  | 2.787232 |
| 24            | 1             | 0           | 4.030776                | 5.790846  | 2.010751 |
| 25            | 1             | 0           | 3.993341                | 7.457647  | 2.570912 |
| 26            | 6             | 0           | 3.895284                | 5.993725  | 4.159572 |
| 27            | 1             | 0           | 4.243418                | 4.981218  | 4.362699 |
| 28            | 1             | 0           | 4.246342                | 6.648975  | 4.959875 |
| 29            | 1             | 0           | 2.803494                | 5.991979  | 4.177518 |
| 30            | 6             | 0           | 5.984420                | 9.957269  | 2.489480 |
| 31            | 1             | 0           | 5.235846                | 9.588835  | 1.784392 |
| 32            | 1             | 0           | 5.631180                | 10.910952 | 2.888785 |
| 33            | 1             | 0           | 6.901705                | 10.143360 | 1.926652 |

DFT wb97xd/6-31++G(d,p) optimised ground state structure:

| Center Number | Atomic Number | Atomic Type | Coordinates (Angstroms) |          |          |
|---------------|---------------|-------------|-------------------------|----------|----------|
|               |               |             | X                       | Y        | Z        |
| 1             | 5             | 0           | 6.160627                | 4.149127 | 1.712986 |
| 2             | 9             | 0           | 5.407807                | 4.355445 | 0.556692 |
| 3             | 9             | 0           | 5.403817                | 3.478618 | 2.674930 |
| 4             | 7             | 0           | 6.651383                | 5.524969 | 2.281130 |
| 5             | 7             | 0           | 7.438661                | 3.330101 | 1.377845 |
| 6             | 6             | 0           | 5.895366                | 6.542049 | 2.705839 |
| 7             | 6             | 0           | 6.727165                | 7.622652 | 3.131500 |
| 8             | 6             | 0           | 8.028659                | 7.211260 | 2.940742 |
| 9             | 6             | 0           | 7.989557                | 5.896620 | 2.407477 |
| 10            | 6             | 0           | 9.005181                | 5.038440 | 2.044654 |
| 11            | 6             | 0           | 8.744975                | 3.764031 | 1.533630 |

|    |   |   |           |           |          |
|----|---|---|-----------|-----------|----------|
| 12 | 6 | 0 | 9.608162  | 2.734119  | 1.110988 |
| 13 | 6 | 0 | 8.804191  | 1.675842  | 0.699049 |
| 14 | 6 | 0 | 7.474791  | 2.086174  | 0.880349 |
| 15 | 1 | 0 | 10.035299 | 5.360501  | 2.158897 |
| 16 | 1 | 0 | 6.559089  | 1.548113  | 0.679072 |
| 17 | 1 | 0 | 9.122295  | 0.719107  | 0.311888 |
| 18 | 1 | 0 | 10.688621 | 2.779506  | 1.114765 |
| 19 | 1 | 0 | 8.931047  | 7.770860  | 3.151409 |
| 20 | 6 | 0 | 6.237662  | 8.951167  | 3.629068 |
| 21 | 1 | 0 | 5.342399  | 8.807536  | 4.244790 |
| 22 | 1 | 0 | 6.996127  | 9.387861  | 4.287228 |
| 23 | 6 | 0 | 4.403954  | 6.486558  | 2.776755 |
| 24 | 1 | 0 | 4.022649  | 5.821037  | 1.999513 |
| 25 | 1 | 0 | 4.011897  | 7.488606  | 2.574105 |
| 26 | 6 | 0 | 3.920739  | 6.011261  | 4.157068 |
| 27 | 1 | 0 | 4.262147  | 4.991130  | 4.344015 |
| 28 | 1 | 0 | 4.299675  | 6.658701  | 4.954159 |
| 29 | 1 | 0 | 2.828116  | 6.024519  | 4.196369 |
| 30 | 6 | 0 | 5.921723  | 9.931226  | 2.490900 |
| 31 | 1 | 0 | 5.152915  | 9.527817  | 1.824288 |
| 32 | 1 | 0 | 5.563046  | 10.886171 | 2.886565 |
| 33 | 1 | 0 | 6.814360  | 10.121833 | 1.887701 |

DFT B3LYP/6-31G(d) optimised 1<sup>st</sup> excited-state structure:

| Center<br>Number | Atomic<br>Number | Atomic<br>Type | Coordinates (Angstroms) |           |          |
|------------------|------------------|----------------|-------------------------|-----------|----------|
|                  |                  |                | X                       | Y         | Z        |
| 1                | 5                | 0              | 6.180618                | 4.019792  | 2.046705 |
| 2                | 9                | 0              | 5.153768                | 4.013778  | 1.112302 |
| 3                | 9                | 0              | 5.785299                | 3.394565  | 3.226092 |
| 4                | 7                | 0              | 6.596080                | 5.505127  | 2.391279 |
| 5                | 7                | 0              | 7.440410                | 3.359566  | 1.449712 |
| 6                | 6                | 0              | 5.741159                | 6.532584  | 2.741832 |
| 7                | 6                | 0              | 6.512875                | 7.647441  | 3.031135 |
| 8                | 6                | 0              | 7.934941                | 7.243494  | 2.822685 |
| 9                | 6                | 0              | 7.936151                | 5.941637  | 2.441668 |
| 10               | 6                | 0              | 9.036747                | 5.071279  | 2.061812 |
| 11               | 6                | 0              | 8.768622                | 3.826022  | 1.544755 |
| 12               | 6                | 0              | 9.616224                | 2.823867  | 0.975953 |
| 13               | 6                | 0              | 8.794610                | 1.792972  | 0.536691 |
| 14               | 6                | 0              | 7.466510                | 2.153489  | 0.840651 |
| 15               | 1                | 0              | 10.050398               | 5.442917  | 2.136800 |
| 16               | 1                | 0              | 6.550044                | 1.608328  | 0.662841 |
| 17               | 1                | 0              | 9.098072                | 0.877531  | 0.046207 |
| 18               | 1                | 0              | 10.691937               | 2.897403  | 0.891406 |
| 19               | 1                | 0              | 8.799068                | 7.882444  | 2.952443 |
| 20               | 6                | 0              | 6.079728                | 8.999789  | 3.466136 |
| 21               | 1                | 0              | 5.004199                | 9.006938  | 3.668401 |
| 22               | 1                | 0              | 6.582284                | 9.248201  | 4.415213 |
| 23               | 6                | 0              | 4.250317                | 6.365510  | 2.835799 |
| 24               | 1                | 0              | 3.917059                | 5.716295  | 2.022214 |
| 25               | 1                | 0              | 3.783300                | 7.344371  | 2.673432 |
| 26               | 6                | 0              | 3.774861                | 5.784489  | 4.182459 |
| 27               | 1                | 0              | 4.209892                | 4.795542  | 4.344915 |
| 28               | 1                | 0              | 4.064594                | 6.432023  | 5.018470 |
| 29               | 1                | 0              | 2.683003                | 5.688862  | 4.189914 |
| 30               | 6                | 0              | 6.424912                | 10.106855 | 2.440266 |
| 31               | 1                | 0              | 5.907908                | 9.930456  | 1.492024 |
| 32               | 1                | 0              | 6.118152                | 11.084293 | 2.827270 |
| 33               | 1                | 0              | 7.500362                | 10.145099 | 2.236885 |

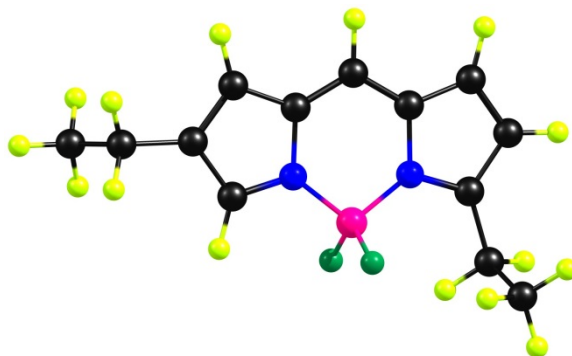

Figure S-31: DFT B3LYP/6-31G(d) optimised ground-state structure of **4.10**

**DFT B3LYP/6-31G(d) optimised ground state structure:**

| Center Number | Atomic Number | Atomic Type | Coordinates (Angstroms) |           |           |
|---------------|---------------|-------------|-------------------------|-----------|-----------|
|               |               |             | X                       | Y         | Z         |
| 1             | 5             | 0           | 6.045899                | 4.316831  | 1.878872  |
| 2             | 9             | 0           | 5.244371                | 4.493134  | 0.761993  |
| 3             | 9             | 0           | 5.340794                | 3.718354  | 2.914590  |
| 4             | 7             | 0           | 6.599193                | 5.704420  | 2.356205  |
| 5             | 7             | 0           | 7.308381                | 3.447612  | 1.515441  |
| 6             | 6             | 0           | 5.869247                | 6.772234  | 2.711282  |
| 7             | 6             | 0           | 6.700838                | 7.835468  | 3.140300  |
| 8             | 6             | 0           | 8.005639                | 7.359855  | 3.029094  |
| 9             | 6             | 0           | 7.939884                | 6.031811  | 2.538863  |
| 10            | 6             | 0           | 8.932404                | 5.104713  | 2.228153  |
| 11            | 6             | 0           | 8.632056                | 3.845996  | 1.724030  |
| 12            | 6             | 0           | 9.483969                | 2.787589  | 1.312518  |
| 13            | 6             | 0           | 8.668012                | 1.767318  | 0.858954  |
| 14            | 6             | 0           | 7.322111                | 2.202463  | 0.996699  |
| 15            | 1             | 0           | 9.973685                | 5.376357  | 2.373911  |
| 16            | 1             | 0           | 8.969367                | 0.807502  | 0.460689  |
| 17            | 1             | 0           | 10.565618               | 2.808157  | 1.347913  |
| 18            | 1             | 0           | 8.917208                | 7.893244  | 3.269407  |
| 19            | 6             | 0           | 6.240921                | 9.199873  | 3.576760  |
| 20            | 1             | 0           | 5.306891                | 9.107858  | 4.146072  |
| 21            | 1             | 0           | 6.979516                | 9.625395  | 4.267258  |
| 22            | 1             | 0           | 4.788406                | 6.741573  | 2.655428  |
| 23            | 6             | 0           | 6.079374                | 1.429940  | 0.675007  |
| 24            | 1             | 0           | 5.309242                | 2.123480  | 0.326252  |
| 25            | 1             | 0           | 6.306668                | 0.744311  | -0.150045 |
| 26            | 6             | 0           | 5.545610                | 0.628604  | 1.881580  |
| 27            | 1             | 0           | 6.295344                | -0.080543 | 2.249695  |
| 28            | 1             | 0           | 5.276256                | 1.307680  | 2.693628  |
| 29            | 1             | 0           | 4.654693                | 0.062058  | 1.589316  |
| 30            | 6             | 0           | 6.022877                | 10.173485 | 2.403638  |
| 31            | 1             | 0           | 5.264762                | 9.792139  | 1.710492  |
| 32            | 1             | 0           | 5.689912                | 11.152880 | 2.766045  |
| 33            | 1             | 0           | 6.949193                | 10.315696 | 1.836195  |

**DFT B3LYP/6-31++G(d,p) optimised ground state structure:**

| Center Number | Atomic Number | Atomic Type | Coordinates (Angstroms) |          |          |
|---------------|---------------|-------------|-------------------------|----------|----------|
|               |               |             | X                       | Y        | Z        |
| 1             | 5             | 0           | 6.028777                | 4.367854 | 1.822829 |
| 2             | 9             | 0           | 5.261965                | 4.581583 | 0.674339 |
| 3             | 9             | 0           | 5.249620                | 3.780608 | 2.823814 |
| 4             | 7             | 0           | 6.607811                | 5.726567 | 2.332463 |
| 5             | 7             | 0           | 7.260360                | 3.453431 | 1.487454 |
| 6             | 6             | 0           | 5.902218                | 6.792447 | 2.739912 |



|    |   |   |           |           |           |
|----|---|---|-----------|-----------|-----------|
| 7  | 6 | 0 | 6.761991  | 7.844837  | 3.130351  |
| 8  | 6 | 0 | 8.055691  | 7.366694  | 2.940001  |
| 9  | 6 | 0 | 7.956680  | 6.044766  | 2.441778  |
| 10 | 6 | 0 | 8.926518  | 5.111341  | 2.089071  |
| 11 | 6 | 0 | 8.593673  | 3.848545  | 1.623379  |
| 12 | 6 | 0 | 9.416295  | 2.769539  | 1.210702  |
| 13 | 6 | 0 | 8.574222  | 1.741665  | 0.831812  |
| 14 | 6 | 0 | 7.239713  | 2.191851  | 1.013687  |
| 15 | 1 | 0 | 9.973231  | 5.376572  | 2.180879  |
| 16 | 1 | 0 | 8.851812  | 0.767755  | 0.458342  |
| 17 | 1 | 0 | 10.496037 | 2.779674  | 1.199226  |
| 18 | 1 | 0 | 8.980267  | 7.890209  | 3.137091  |
| 19 | 6 | 0 | 6.334929  | 9.203436  | 3.610932  |
| 20 | 1 | 0 | 5.423257  | 9.106347  | 4.209683  |
| 21 | 1 | 0 | 7.100920  | 9.602356  | 4.283179  |
| 22 | 1 | 0 | 4.821908  | 6.767938  | 2.745443  |
| 23 | 6 | 0 | 5.984382  | 1.415070  | 0.773064  |
| 24 | 1 | 0 | 5.177753  | 2.100565  | 0.509153  |
| 25 | 1 | 0 | 6.152433  | 0.760459  | -0.087639 |
| 26 | 6 | 0 | 5.566444  | 0.564215  | 1.990497  |
| 27 | 1 | 0 | 6.353171  | -0.141122 | 2.270622  |
| 28 | 1 | 0 | 5.349901  | 1.204460  | 2.846556  |
| 29 | 1 | 0 | 4.666243  | -0.007924 | 1.751932  |
| 30 | 6 | 0 | 6.086962  | 10.205920 | 2.469357  |
| 31 | 1 | 0 | 5.302009  | 9.850035  | 1.796759  |
| 32 | 1 | 0 | 5.778902  | 11.177765 | 2.865300  |
| 33 | 1 | 0 | 6.992251  | 10.352024 | 1.874265  |

DFT mpw1pw91/6-31++G(d,p) optimised ground state structure:

| Center<br>Number | Atomic<br>Number | Atomic<br>Type | Coordinates (Angstroms) |           |           |
|------------------|------------------|----------------|-------------------------|-----------|-----------|
|                  |                  |                | X                       | Y         | Z         |
| 1                | 5                | 0              | 6.032984                | 4.385288  | 1.799862  |
| 2                | 9                | 0              | 5.296705                | 4.610679  | 0.641664  |
| 3                | 9                | 0              | 5.233324                | 3.804980  | 2.778545  |
| 4                | 7                | 0              | 6.614977                | 5.730872  | 2.323272  |
| 5                | 7                | 0              | 7.257602                | 3.465863  | 1.486854  |
| 6                | 6                | 0              | 5.914003                | 6.791885  | 2.730365  |
| 7                | 6                | 0              | 6.772130                | 7.837930  | 3.126820  |
| 8                | 6                | 0              | 8.060859                | 7.357835  | 2.938721  |
| 9                | 6                | 0              | 7.956911                | 6.042560  | 2.437053  |
| 10               | 6                | 0              | 8.922636                | 5.108517  | 2.088759  |
| 11               | 6                | 0              | 8.584859                | 3.850335  | 1.625215  |
| 12               | 6                | 0              | 9.401005                | 2.767315  | 1.225328  |
| 13               | 6                | 0              | 8.555892                | 1.745251  | 0.851851  |
| 14               | 6                | 0              | 7.228754                | 2.207693  | 1.024792  |
| 15               | 1                | 0              | 9.969665                | 5.368609  | 2.185013  |
| 16               | 1                | 0              | 8.826931                | 0.766464  | 0.487469  |
| 17               | 1                | 0              | 10.480490               | 2.770450  | 1.219822  |
| 18               | 1                | 0              | 8.986630                | 7.876732  | 3.140338  |
| 19               | 6                | 0              | 6.348426                | 9.190003  | 3.608124  |
| 20               | 1                | 0              | 5.452199                | 9.089722  | 4.227853  |
| 21               | 1                | 0              | 7.126169                | 9.596338  | 4.260623  |
| 22               | 1                | 0              | 4.833839                | 6.769395  | 2.731183  |
| 23               | 6                | 0              | 5.970946                | 1.446167  | 0.790323  |
| 24               | 1                | 0              | 5.162289                | 2.143021  | 0.568553  |
| 25               | 1                | 0              | 6.114862                | 0.819541  | -0.094376 |
| 26               | 6                | 0              | 5.589048                | 0.566820  | 1.987082  |
| 27               | 1                | 0              | 6.381448                | -0.146057 | 2.225561  |
| 28               | 1                | 0              | 5.398969                | 1.182274  | 2.866580  |
| 29               | 1                | 0              | 4.681818                | 0.002722  | 1.761083  |
| 30               | 6                | 0              | 6.070806                | 10.174261 | 2.469647  |
| 31               | 1                | 0              | 5.275058                | 9.806991  | 1.817632  |
| 32               | 1                | 0              | 5.764988                | 11.147610 | 2.860801  |
| 33               | 1                | 0              | 6.961119                | 10.319419 | 1.853820  |

DFT wb97xd/6-31++G(d,p) optimised ground state structure:

| Center<br>Number | Atomic<br>Number | Atomic<br>Type | Coordinates (Angstroms) |           |           |
|------------------|------------------|----------------|-------------------------|-----------|-----------|
|                  |                  |                | X                       | Y         | Z         |
| 1                | 5                | 0              | 6.063195                | 4.415111  | 1.784085  |
| 2                | 9                | 0              | 5.352661                | 4.661204  | 0.608969  |
| 3                | 9                | 0              | 5.231873                | 3.843583  | 2.747655  |
| 4                | 7                | 0              | 6.660320                | 5.748078  | 2.323877  |
| 5                | 7                | 0              | 7.277594                | 3.472749  | 1.492082  |
| 6                | 6                | 0              | 5.970554                | 6.826628  | 2.706835  |
| 7                | 6                | 0              | 6.841260                | 7.855893  | 3.125620  |
| 8                | 6                | 0              | 8.125523                | 7.348105  | 2.976498  |
| 9                | 6                | 0              | 8.008493                | 6.031868  | 2.476352  |
| 10               | 6                | 0              | 8.965171                | 5.075737  | 2.151717  |
| 11               | 6                | 0              | 8.613761                | 3.825724  | 1.671480  |
| 12               | 6                | 0              | 9.415382                | 2.723482  | 1.287478  |
| 13               | 6                | 0              | 8.555229                | 1.723656  | 0.882004  |
| 14               | 6                | 0              | 7.234105                | 2.219216  | 1.020547  |
| 15               | 1                | 0              | 10.016356               | 5.312948  | 2.280923  |
| 16               | 1                | 0              | 8.810396                | 0.738391  | 0.517961  |
| 17               | 1                | 0              | 10.496271               | 2.697821  | 1.315233  |
| 18               | 1                | 0              | 9.056120                | 7.852824  | 3.201711  |
| 19               | 6                | 0              | 6.429703                | 9.221493  | 3.594584  |
| 20               | 1                | 0              | 5.670187                | 9.126342  | 4.379638  |
| 21               | 1                | 0              | 7.292584                | 9.711556  | 4.057638  |
| 22               | 1                | 0              | 4.888925                | 6.828268  | 2.671244  |
| 23               | 6                | 0              | 5.961901                | 1.482689  | 0.752494  |
| 24               | 1                | 0              | 5.165363                | 2.195641  | 0.530391  |
| 25               | 1                | 0              | 6.108167                | 0.863235  | -0.138622 |
| 26               | 6                | 0              | 5.554731                | 0.596208  | 1.939977  |
| 27               | 1                | 0              | 6.329172                | -0.144337 | 2.163021  |
| 28               | 1                | 0              | 5.388139                | 1.206390  | 2.830504  |
| 29               | 1                | 0              | 4.628015                | 0.063857  | 1.708720  |
| 30               | 6                | 0              | 5.883323                | 10.101450 | 2.463090  |
| 31               | 1                | 0              | 5.001030                | 9.646569  | 2.002160  |
| 32               | 1                | 0              | 5.597724                | 11.088012 | 2.840612  |
| 33               | 1                | 0              | 6.635116                | 10.237088 | 1.679754  |

### DFT B3LYP/6-31G(d) optimised 1<sup>st</sup> excited-state structure:

| Center<br>Number | Atomic<br>Number | Atomic<br>Type | Coordinates (Angstroms) |           |           |
|------------------|------------------|----------------|-------------------------|-----------|-----------|
|                  |                  |                | X                       | Y         | Z         |
| 1                | 5                | 0              | 6.041319                | 4.204684  | 2.127506  |
| 2                | 9                | 0              | 4.987823                | 4.302403  | 1.227368  |
| 3                | 9                | 0              | 5.619021                | 3.634658  | 3.325564  |
| 4                | 7                | 0              | 6.550554                | 5.661904  | 2.437058  |
| 5                | 7                | 0              | 7.251711                | 3.453788  | 1.527252  |
| 6                | 6                | 0              | 5.736527                | 6.710518  | 2.772583  |
| 7                | 6                | 0              | 6.514777                | 7.809547  | 3.057675  |
| 8                | 6                | 0              | 7.933730                | 7.361767  | 2.848087  |
| 9                | 6                | 0              | 7.896222                | 6.058446  | 2.474070  |
| 10               | 6                | 0              | 8.944202                | 5.121445  | 2.083536  |
| 11               | 6                | 0              | 8.597464                | 3.886930  | 1.593485  |
| 12               | 6                | 0              | 9.410825                | 2.846903  | 1.037036  |
| 13               | 6                | 0              | 8.557911                | 1.831931  | 0.640793  |
| 14               | 6                | 0              | 7.230889                | 2.217524  | 0.953688  |
| 15               | 1                | 0              | 9.979351                | 5.432821  | 2.128989  |
| 16               | 1                | 0              | 8.827465                | 0.895149  | 0.169535  |
| 17               | 1                | 0              | 10.486574               | 2.893364  | 0.934743  |
| 18               | 1                | 0              | 8.813760                | 7.979183  | 2.973441  |
| 19               | 6                | 0              | 6.092015                | 9.166590  | 3.484385  |
| 20               | 1                | 0              | 5.010653                | 9.179717  | 3.657612  |
| 21               | 1                | 0              | 6.572733                | 9.406896  | 4.446847  |
| 22               | 1                | 0              | 4.664367                | 6.588106  | 2.797468  |
| 23               | 6                | 0              | 5.983883                | 1.410769  | 0.767215  |
| 24               | 1                | 0              | 5.160809                | 2.076689  | 0.491054  |
| 25               | 1                | 0              | 6.145648                | 0.719817  | -0.069077 |
| 26               | 6                | 0              | 5.585768                | 0.607047  | 2.025571  |
| 27               | 1                | 0              | 6.377504                | -0.094815 | 2.310271  |
| 28               | 1                | 0              | 5.401233                | 1.280919  | 2.865523  |
| 29               | 1                | 0              | 4.672827                | 0.032348  | 1.831588  |

|    |   |   |          |           |          |
|----|---|---|----------|-----------|----------|
| 30 | 6 | 0 | 6.475172 | 10.270745 | 2.470119 |
| 31 | 1 | 0 | 5.983498 | 10.099470 | 1.507661 |
| 32 | 1 | 0 | 6.165785 | 11.250155 | 2.849627 |
| 33 | 1 | 0 | 7.556323 | 10.300064 | 2.297960 |

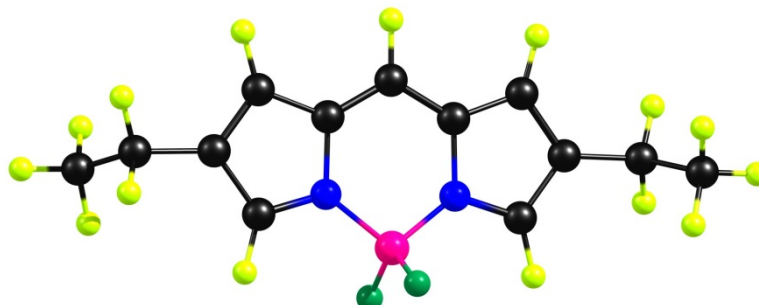

Figure S-32: DFT B3LYP/6-31G(d) optimised ground-state structure of **4.11**

**DFT B3LYP/6-31G(d) optimised ground state structure:**

| Center Number | Atomic Number | Atomic Type | Coordinates (Angstroms) |           |           |
|---------------|---------------|-------------|-------------------------|-----------|-----------|
|               |               |             | X                       | Y         | Z         |
| 1             | 5             | 0           | 6.046371                | 4.248683  | 1.863810  |
| 2             | 9             | 0           | 5.184629                | 4.447318  | 0.803077  |
| 3             | 9             | 0           | 5.420698                | 3.613129  | 2.919785  |
| 4             | 7             | 0           | 6.635625                | 5.626116  | 2.345399  |
| 5             | 7             | 0           | 7.290640                | 3.406127  | 1.396600  |
| 6             | 6             | 0           | 5.938167                | 6.687064  | 2.770776  |
| 7             | 6             | 0           | 6.802693                | 7.734630  | 3.181311  |
| 8             | 6             | 0           | 8.092963                | 7.254067  | 2.982916  |
| 9             | 6             | 0           | 7.989293                | 5.938767  | 2.460037  |
| 10            | 6             | 0           | 8.959048                | 5.020991  | 2.067032  |
| 11            | 6             | 0           | 8.626853                | 3.776695  | 1.539094  |
| 12            | 6             | 0           | 9.431054                | 2.719010  | 1.040423  |
| 13            | 6             | 0           | 8.579934                | 1.712736  | 0.595066  |
| 14            | 6             | 0           | 7.265865                | 2.188823  | 0.839160  |
| 15            | 1             | 0           | 10.007071               | 5.288972  | 2.163505  |
| 16            | 1             | 0           | 10.513730               | 2.718463  | 1.009120  |
| 17            | 1             | 0           | 9.020919                | 7.775316  | 3.183842  |
| 18            | 6             | 0           | 6.377774                | 9.087542  | 3.683612  |
| 19            | 1             | 0           | 5.552001                | 8.972790  | 4.398220  |
| 20            | 1             | 0           | 7.206221                | 9.538234  | 4.243434  |
| 21            | 1             | 0           | 4.855514                | 6.665416  | 2.775544  |
| 22            | 1             | 0           | 6.322109                | 1.701418  | 0.628537  |
| 23            | 6             | 0           | 8.942289                | 0.376407  | 0.006760  |
| 24            | 1             | 0           | 8.279226                | 0.154630  | -0.839869 |
| 25            | 1             | 0           | 9.957357                | 0.428881  | -0.405357 |
| 26            | 6             | 0           | 8.864182                | -0.777730 | 1.023230  |
| 27            | 1             | 0           | 7.852567                | -0.875348 | 1.432773  |
| 28            | 1             | 0           | 9.132655                | -1.730411 | 0.552527  |
| 29            | 1             | 0           | 9.546479                | -0.606352 | 1.863023  |
| 30            | 6             | 0           | 5.941280                | 10.045464 | 2.559755  |
| 31            | 1             | 0           | 5.094042                | 9.635704  | 1.998551  |
| 32            | 1             | 0           | 5.638174                | 11.015447 | 2.970230  |
| 33            | 1             | 0           | 6.758516                | 10.214245 | 1.849971  |

**DFT B3LYP/6-31++G(d,p) optimised ground state structure:**

| Center<br>Number | Atomic<br>Number | Atomic<br>Type | Coordinates (Angstroms) |           |           |
|------------------|------------------|----------------|-------------------------|-----------|-----------|
|                  |                  |                | X                       | Y         | Z         |
| 1                | 5                | 0              | 6.052192                | 4.284849  | 1.760220  |
| 2                | 9                | 0              | 5.255487                | 4.528531  | 0.642530  |
| 3                | 9                | 0              | 5.319418                | 3.642922  | 2.757381  |
| 4                | 7                | 0              | 6.636215                | 5.632495  | 2.306886  |
| 5                | 7                | 0              | 7.289390                | 3.411409  | 1.357080  |
| 6                | 6                | 0              | 5.939107                | 6.677869  | 2.770298  |
| 7                | 6                | 0              | 6.805532                | 7.721195  | 3.179538  |
| 8                | 6                | 0              | 8.093698                | 7.256419  | 2.941307  |
| 9                | 6                | 0              | 7.988414                | 5.951262  | 2.396292  |
| 10               | 6                | 0              | 8.956586                | 5.041088  | 1.989111  |
| 11               | 6                | 0              | 8.622916                | 3.791944  | 1.479333  |
| 12               | 6                | 0              | 9.426507                | 2.723438  | 1.005944  |
| 13               | 6                | 0              | 8.576187                | 1.701848  | 0.599183  |
| 14               | 6                | 0              | 7.263232                | 2.177715  | 0.836667  |
| 15               | 1                | 0              | 10.002341               | 5.313380  | 2.071526  |
| 16               | 1                | 0              | 10.506527               | 2.725386  | 0.970655  |
| 17               | 1                | 0              | 9.020642                | 7.777038  | 3.134761  |
| 18               | 6                | 0              | 6.383619                | 9.057099  | 3.723591  |
| 19               | 1                | 0              | 5.566126                | 8.916954  | 4.439039  |
| 20               | 1                | 0              | 7.214379                | 9.488911  | 4.289781  |
| 21               | 1                | 0              | 4.859150                | 6.648422  | 2.800516  |
| 22               | 1                | 0              | 6.322265                | 1.680959  | 0.647185  |
| 23               | 6                | 0              | 8.940006                | 0.350818  | 0.050553  |
| 24               | 1                | 0              | 8.272216                | 0.104223  | -0.781943 |
| 25               | 1                | 0              | 9.948737                | 0.397970  | -0.370675 |
| 26               | 6                | 0              | 8.876084                | -0.773223 | 1.100152  |
| 27               | 1                | 0              | 7.870369                | -0.865044 | 1.518792  |
| 28               | 1                | 0              | 9.145873                | -1.735344 | 0.655772  |
| 29               | 1                | 0              | 9.562562                | -0.574961 | 1.927435  |
| 30               | 6                | 0              | 5.937517                | 10.048341 | 2.633801  |
| 31               | 1                | 0              | 5.087318                | 9.656925  | 2.068906  |
| 32               | 1                | 0              | 5.638406                | 11.002827 | 3.075873  |
| 33               | 1                | 0              | 6.746923                | 10.239578 | 1.924402  |

**DFT mpw1pw91/6-31++G(d,p) optimised ground state structure:**

| Center<br>Number | Atomic<br>Number | Atomic<br>Type | Coordinates (Angstroms) |           |           |
|------------------|------------------|----------------|-------------------------|-----------|-----------|
|                  |                  |                | X                       | Y         | Z         |
| 1                | 5                | 0              | 6.063977                | 4.288215  | 1.759548  |
| 2                | 9                | 0              | 5.273391                | 4.532765  | 0.646132  |
| 3                | 9                | 0              | 5.335445                | 3.648403  | 2.751731  |
| 4                | 7                | 0              | 6.646656                | 5.629581  | 2.305428  |
| 5                | 7                | 0              | 7.297312                | 3.419364  | 1.358633  |
| 6                | 6                | 0              | 5.950487                | 6.668748  | 2.766083  |
| 7                | 6                | 0              | 6.811686                | 7.710237  | 3.176753  |
| 8                | 6                | 0              | 8.096614                | 7.247805  | 2.940683  |
| 9                | 6                | 0              | 7.990658                | 5.947481  | 2.396433  |
| 10               | 6                | 0              | 8.957576                | 5.041069  | 1.990661  |
| 11               | 6                | 0              | 8.623479                | 3.796178  | 1.480957  |
| 12               | 6                | 0              | 9.425758                | 2.732106  | 1.009393  |
| 13               | 6                | 0              | 8.577214                | 1.714595  | 0.602859  |
| 14               | 6                | 0              | 7.269145                | 2.191709  | 0.840170  |
| 15               | 1                | 0              | 10.002767               | 5.312977  | 2.074160  |
| 16               | 1                | 0              | 10.505456               | 2.733759  | 0.975315  |
| 17               | 1                | 0              | 9.023110                | 7.768122  | 3.135071  |
| 18               | 6                | 0              | 6.388283                | 9.039750  | 3.716973  |
| 19               | 1                | 0              | 5.578207                | 8.897238  | 4.439090  |
| 20               | 1                | 0              | 7.220342                | 9.477248  | 4.275130  |
| 21               | 1                | 0              | 4.870748                | 6.636935  | 2.793750  |
| 22               | 1                | 0              | 6.327045                | 1.697491  | 0.650942  |
| 23               | 6                | 0              | 8.936671                | 0.368400  | 0.057634  |
| 24               | 1                | 0              | 8.276688                | 0.128373  | -0.781886 |
| 25               | 1                | 0              | 9.948938                | 0.410703  | -0.353210 |
| 26               | 6                | 0              | 8.853613                | -0.746122 | 1.102821  |
| 27               | 1                | 0              | 7.843654                | -0.829412 | 1.510591  |
| 28               | 1                | 0              | 9.121069                | -1.711213 | 0.666047  |
| 29               | 1                | 0              | 9.530838                | -0.550025 | 1.936964  |
| 30               | 6                | 0              | 5.932143                | 10.014077 | 2.628811  |

|    |   |   |          |           |          |
|----|---|---|----------|-----------|----------|
| 31 | 1 | 0 | 5.081782 | 9.613388  | 2.072421 |
| 32 | 1 | 0 | 5.630178 | 10.970150 | 3.062913 |
| 33 | 1 | 0 | 6.735010 | 10.203148 | 1.912890 |

DFT wb97xd/6-31++G(d,p) optimised ground state structure:

| Center<br>Number | Atomic<br>Number | Atomic<br>Type | Coordinates (Angstroms) |           |           |
|------------------|------------------|----------------|-------------------------|-----------|-----------|
|                  |                  |                | X                       | Y         | Z         |
| 1                | 5                | 0              | 6.057500                | 4.287467  | 1.753957  |
| 2                | 9                | 0              | 5.267707                | 4.538682  | 0.636199  |
| 3                | 9                | 0              | 5.324832                | 3.641130  | 2.744770  |
| 4                | 7                | 0              | 6.640061                | 5.627001  | 2.307954  |
| 5                | 7                | 0              | 7.292673                | 3.419693  | 1.351526  |
| 6                | 6                | 0              | 5.942510                | 6.665353  | 2.771460  |
| 7                | 6                | 0              | 6.803585                | 7.705021  | 3.191461  |
| 8                | 6                | 0              | 8.091268                | 7.244922  | 2.957371  |
| 9                | 6                | 0              | 7.987536                | 5.945839  | 2.405626  |
| 10               | 6                | 0              | 8.956267                | 5.039794  | 1.995643  |
| 11               | 6                | 0              | 8.622951                | 3.795822  | 1.477104  |
| 12               | 6                | 0              | 9.425642                | 2.731987  | 1.000933  |
| 13               | 6                | 0              | 8.574732                | 1.716847  | 0.588548  |
| 14               | 6                | 0              | 7.265257                | 2.193183  | 0.827582  |
| 15               | 1                | 0              | 10.003556               | 5.311601  | 2.082957  |
| 16               | 1                | 0              | 10.507540               | 2.731198  | 0.967226  |
| 17               | 1                | 0              | 9.017885                | 7.766988  | 3.158537  |
| 18               | 6                | 0              | 6.374520                | 9.039903  | 3.727021  |
| 19               | 1                | 0              | 5.543018                | 8.902871  | 4.427654  |
| 20               | 1                | 0              | 7.196903                | 9.474577  | 4.305075  |
| 21               | 1                | 0              | 4.860811                | 6.633517  | 2.794553  |
| 22               | 1                | 0              | 6.321400                | 1.699317  | 0.635618  |
| 23               | 6                | 0              | 8.933117                | 0.363618  | 0.047101  |
| 24               | 1                | 0              | 8.259180                | 0.109934  | -0.779042 |
| 25               | 1                | 0              | 9.941472                | 0.404082  | -0.378320 |
| 26               | 6                | 0              | 8.868806                | -0.736922 | 1.114277  |
| 27               | 1                | 0              | 7.862864                | -0.811452 | 1.538926  |
| 28               | 1                | 0              | 9.130905                | -1.709952 | 0.687757  |
| 29               | 1                | 0              | 9.560147                | -0.522449 | 1.934804  |
| 30               | 6                | 0              | 5.952998                | 10.014359 | 2.619345  |
| 31               | 1                | 0              | 5.116117                | 9.610615  | 2.041054  |
| 32               | 1                | 0              | 5.642501                | 10.974825 | 3.041838  |
| 33               | 1                | 0              | 6.779680                | 10.193872 | 1.925380  |

DFT B3LYP/6-31G(d) optimised 1<sup>st</sup> excited-state structure:

| Center<br>Number | Atomic<br>Number | Atomic<br>Type | Coordinates (Angstroms) |          |          |
|------------------|------------------|----------------|-------------------------|----------|----------|
|                  |                  |                | X                       | Y        | Z        |
| 1                | 5                | 0              | 5.983708                | 4.154244 | 2.306367 |
| 2                | 9                | 0              | 4.898707                | 4.207871 | 1.451412 |
| 3                | 9                | 0              | 5.662630                | 3.532209 | 3.503412 |
| 4                | 7                | 0              | 6.589189                | 5.556553 | 2.529399 |
| 5                | 7                | 0              | 7.146739                | 3.339547 | 1.627124 |
| 6                | 6                | 0              | 5.898327                | 6.685697 | 2.790341 |
| 7                | 6                | 0              | 6.775157                | 7.733792 | 3.163071 |
| 8                | 6                | 0              | 8.062745                | 7.202861 | 3.122643 |
| 9                | 6                | 0              | 7.963652                | 5.839109 | 2.705890 |
| 10               | 6                | 0              | 8.919662                | 4.894846 | 2.411904 |
| 11               | 6                | 0              | 8.509761                | 3.644637 | 1.778175 |
| 12               | 6                | 0              | 9.221732                | 2.667036 | 1.161250 |
| 13               | 6                | 0              | 8.240109                | 1.694508 | 0.579174 |
| 14               | 6                | 0              | 6.995858                | 2.192067 | 0.897014 |
| 15               | 1                | 0              | 9.973290                | 5.100207 | 2.547597 |
| 16               | 1                | 0              | 10.298799               | 2.600444 | 1.076222 |
| 17               | 1                | 0              | 8.990258                | 7.721919 | 3.327433 |
| 18               | 6                | 0              | 6.368417                | 9.143866 | 3.486792 |
| 19               | 1                | 0              | 5.407185                | 9.136668 | 4.017097 |

|    |   |   |           |           |           |
|----|---|---|-----------|-----------|-----------|
| 20 | 1 | 0 | 7.099435  | 9.581796  | 4.177551  |
| 21 | 1 | 0 | 4.818177  | 6.694331  | 2.729065  |
| 22 | 1 | 0 | 6.011535  | 1.804630  | 0.681551  |
| 23 | 6 | 0 | 8.587416  | 0.449865  | -0.152037 |
| 24 | 1 | 0 | 7.679049  | -0.000995 | -0.565868 |
| 25 | 1 | 0 | 9.236508  | 0.703780  | -1.006076 |
| 26 | 6 | 0 | 9.332661  | -0.584932 | 0.724202  |
| 27 | 1 | 0 | 8.706831  | -0.902334 | 1.563817  |
| 28 | 1 | 0 | 9.587827  | -1.466671 | 0.127228  |
| 29 | 1 | 0 | 10.260911 | -0.170474 | 1.131529  |
| 30 | 6 | 0 | 6.247576  | 10.041450 | 2.239952  |
| 31 | 1 | 0 | 5.500091  | 9.647123  | 1.542742  |
| 32 | 1 | 0 | 5.949556  | 11.058546 | 2.519861  |
| 33 | 1 | 0 | 7.202442  | 10.099047 | 1.706059  |

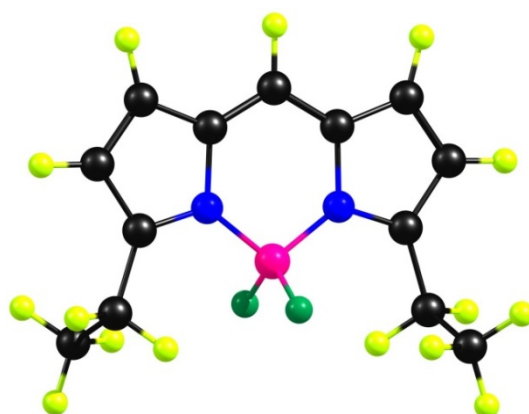

Figure S-33: DFT B3LYP/6-31G(d) optimised ground-state structure of **4.12**

**DFT B3LYP/6-31G(d) optimised ground state structure:**

| Center Number | Atomic Number | Atomic Type | Coordinates (Angstroms) |          |           |
|---------------|---------------|-------------|-------------------------|----------|-----------|
|               |               |             | X                       | Y        | Z         |
| 1             | 5             | 0           | 6.088762                | 4.268504 | 1.829825  |
| 2             | 9             | 0           | 5.332146                | 4.435701 | 0.673110  |
| 3             | 9             | 0           | 5.322715                | 3.697694 | 2.842625  |
| 4             | 7             | 0           | 6.648540                | 5.653884 | 2.314054  |
| 5             | 7             | 0           | 7.331749                | 3.360980 | 1.515989  |
| 6             | 6             | 0           | 5.932866                | 6.729090 | 2.710800  |
| 7             | 6             | 0           | 6.823206                | 7.770172 | 3.081183  |
| 8             | 6             | 0           | 8.113213                | 7.299736 | 2.903283  |
| 9             | 6             | 0           | 8.004075                | 5.969964 | 2.424332  |
| 10            | 6             | 0           | 8.981600                | 5.035300 | 2.103261  |
| 11            | 6             | 0           | 8.662923                | 3.757057 | 1.659667  |
| 12            | 6             | 0           | 9.493167                | 2.676282 | 1.269513  |
| 13            | 6             | 0           | 8.654746                | 1.641669 | 0.890430  |
| 14            | 6             | 0           | 7.318786                | 2.092634 | 1.050374  |
| 15            | 1             | 0           | 10.026906               | 5.312378 | 2.202068  |
| 16            | 1             | 0           | 10.575493               | 2.688873 | 1.269822  |
| 17            | 1             | 0           | 9.042929                | 7.820470 | 3.093157  |
| 18            | 1             | 0           | 8.936895                | 0.661661 | 0.528843  |
| 19            | 1             | 0           | 6.519194                | 8.744384 | 3.440707  |
| 20            | 6             | 0           | 6.061936                | 1.317727 | 0.793704  |
| 21            | 1             | 0           | 5.289086                | 1.999825 | 0.428065  |
| 22            | 1             | 0           | 6.266135                | 0.594823 | -0.005253 |
| 23            | 6             | 0           | 4.434860                | 6.773777 | 2.707083  |
| 24            | 1             | 0           | 4.046460                | 5.783867 | 2.962960  |
| 25            | 1             | 0           | 4.114030                | 7.465760 | 3.495020  |
| 26            | 6             | 0           | 3.849432                | 7.227336 | 1.353415  |
| 27            | 1             | 0           | 4.125047                | 6.519137 | 0.569001  |
| 28            | 1             | 0           | 2.756489                | 7.273111 | 1.414413  |
| 29            | 1             | 0           | 4.217265                | 8.221330 | 1.075599  |

|    |   |   |          |           |          |
|----|---|---|----------|-----------|----------|
| 30 | 6 | 0 | 5.548120 | 0.572798  | 2.043478 |
| 31 | 1 | 0 | 6.301589 | -0.123972 | 2.427278 |
| 32 | 1 | 0 | 5.297992 | 1.287758  | 2.830296 |
| 33 | 1 | 0 | 4.648756 | -0.001077 | 1.794175 |

DFT B3LYP/6-31++G(d,p) optimised ground state structure:

| Center<br>Number | Atomic<br>Number | Atomic<br>Type | Coordinates (Angstroms) |           |           |
|------------------|------------------|----------------|-------------------------|-----------|-----------|
|                  |                  |                | X                       | Y         | Z         |
| 1                | 5                | 0              | 6.082426                | 4.266228  | 1.830075  |
| 2                | 9                | 0              | 5.308964                | 4.437444  | 0.674653  |
| 3                | 9                | 0              | 5.309447                | 3.682927  | 2.842411  |
| 4                | 7                | 0              | 6.633555                | 5.650898  | 2.311866  |
| 5                | 7                | 0              | 7.318463                | 3.357786  | 1.513645  |
| 6                | 6                | 0              | 5.916834                | 6.729125  | 2.694981  |
| 7                | 6                | 0              | 6.807341                | 7.769118  | 3.063352  |
| 8                | 6                | 0              | 8.096354                | 7.296029  | 2.893321  |
| 9                | 6                | 0              | 7.988762                | 5.965174  | 2.421764  |
| 10               | 6                | 0              | 8.966043                | 5.034625  | 2.096899  |
| 11               | 6                | 0              | 8.647887                | 3.758881  | 1.652162  |
| 12               | 6                | 0              | 9.477444                | 2.677744  | 1.267331  |
| 13               | 6                | 0              | 8.641133                | 1.638319  | 0.900646  |
| 14               | 6                | 0              | 7.305343                | 2.085077  | 1.063005  |
| 15               | 1                | 0              | 10.008998               | 5.312542  | 2.193407  |
| 16               | 1                | 0              | 10.557174               | 2.691723  | 1.264311  |
| 17               | 1                | 0              | 9.023307                | 7.816771  | 3.082019  |
| 18               | 1                | 0              | 8.925851                | 0.658774  | 0.547729  |
| 19               | 1                | 0              | 6.506032                | 8.744238  | 3.414747  |
| 20               | 6                | 0              | 6.055566                | 1.297425  | 0.825668  |
| 21               | 1                | 0              | 5.249027                | 1.973270  | 0.537910  |
| 22               | 1                | 0              | 6.236237                | 0.626488  | -0.019859 |
| 23               | 6                | 0              | 4.421766                | 6.785359  | 2.678330  |
| 24               | 1                | 0              | 4.018427                | 5.787116  | 2.854130  |
| 25               | 1                | 0              | 4.099646                | 7.418601  | 3.510770  |
| 26               | 6                | 0              | 3.857954                | 7.349717  | 1.357826  |
| 27               | 1                | 0              | 4.132494                | 6.706803  | 0.520596  |
| 28               | 1                | 0              | 2.767274                | 7.400219  | 1.410368  |
| 29               | 1                | 0              | 4.235692                | 8.357022  | 1.163981  |
| 30               | 6                | 0              | 5.627095                | 0.468656  | 2.054357  |
| 31               | 1                | 0              | 6.413174                | -0.228546 | 2.355874  |
| 32               | 1                | 0              | 5.400291                | 1.124282  | 2.896008  |
| 33               | 1                | 0              | 4.731108                | -0.111202 | 1.817995  |

DFT mpw1pw91/6-31++G(d,p) optimised ground state structure:

| Center<br>Number | Atomic<br>Number | Atomic<br>Type | Coordinates (Angstroms) |          |          |
|------------------|------------------|----------------|-------------------------|----------|----------|
|                  |                  |                | X                       | Y        | Z        |
| 1                | 5                | 0              | 6.078622                | 4.264947 | 1.830461 |
| 2                | 9                | 0              | 5.308855                | 4.436106 | 0.680926 |
| 3                | 9                | 0              | 5.312376                | 3.683946 | 2.839661 |
| 4                | 7                | 0              | 6.629914                | 5.643904 | 2.307142 |
| 5                | 7                | 0              | 7.311050                | 3.361990 | 1.516711 |
| 6                | 6                | 0              | 5.913655                | 6.716475 | 2.681606 |
| 7                | 6                | 0              | 6.797068                | 7.758367 | 3.046148 |
| 8                | 6                | 0              | 8.083291                | 7.287557 | 2.880801 |
| 9                | 6                | 0              | 7.976455                | 5.958819 | 2.416224 |
| 10               | 6                | 0              | 8.952613                | 5.031642 | 2.093768 |
| 11               | 6                | 0              | 8.633258                | 3.758917 | 1.652491 |
| 12               | 6                | 0              | 9.459909                | 2.679294 | 1.273224 |
| 13               | 6                | 0              | 8.624032                | 1.642512 | 0.912985 |
| 14               | 6                | 0              | 7.294028                | 2.093873 | 1.074804 |
| 15               | 1                | 0              | 9.995044                | 5.309669 | 2.189357 |
| 16               | 1                | 0              | 10.539303               | 2.692377 | 1.269948 |
| 17               | 1                | 0              | 9.009490                | 7.809454 | 3.068022 |
| 18               | 1                | 0              | 8.905605                | 0.660927 | 0.564341 |

|    |   |   |          |           |           |
|----|---|---|----------|-----------|-----------|
| 19 | 1 | 0 | 6.492810 | 8.734014  | 3.392392  |
| 20 | 6 | 0 | 6.044485 | 1.315340  | 0.848526  |
| 21 | 1 | 0 | 5.231172 | 1.999527  | 0.605588  |
| 22 | 1 | 0 | 6.200909 | 0.672366  | -0.022274 |
| 23 | 6 | 0 | 4.425121 | 6.764694  | 2.656715  |
| 24 | 1 | 0 | 4.028421 | 5.757791  | 2.788544  |
| 25 | 1 | 0 | 4.092789 | 7.360709  | 3.511400  |
| 26 | 6 | 0 | 3.879025 | 7.376099  | 1.360987  |
| 27 | 1 | 0 | 4.166530 | 6.768595  | 0.502758  |
| 28 | 1 | 0 | 2.788561 | 7.421198  | 1.399550  |
| 29 | 1 | 0 | 4.255398 | 8.390373  | 1.211067  |
| 30 | 6 | 0 | 5.660654 | 0.456043  | 2.058955  |
| 31 | 1 | 0 | 6.457396 | -0.245056 | 2.316942  |
| 32 | 1 | 0 | 5.459250 | 1.086720  | 2.924971  |
| 33 | 1 | 0 | 4.760019 | -0.120555 | 1.837536  |

DFT wb97xd/6-31++G(d,p) optimised ground state structure:

| Center Number | Atomic Number | Atomic Type | Coordinates (Angstroms) |           |           |
|---------------|---------------|-------------|-------------------------|-----------|-----------|
|               |               |             | X                       | Y         | Z         |
| 1             | 5             | 0           | 6.073025                | 4.262555  | 1.831258  |
| 2             | 9             | 0           | 5.296646                | 4.435152  | 0.681386  |
| 3             | 9             | 0           | 5.310939                | 3.675863  | 2.846040  |
| 4             | 7             | 0           | 6.623862                | 5.642888  | 2.309156  |
| 5             | 7             | 0           | 7.307727                | 3.362815  | 1.510150  |
| 6             | 6             | 0           | 5.908048                | 6.712484  | 2.691866  |
| 7             | 6             | 0           | 6.789429                | 7.757990  | 3.057104  |
| 8             | 6             | 0           | 8.078872                | 7.291575  | 2.884425  |
| 9             | 6             | 0           | 7.974125                | 5.962906  | 2.414797  |
| 10            | 6             | 0           | 8.952092                | 5.037487  | 2.084055  |
| 11            | 6             | 0           | 8.634252                | 3.763286  | 1.639537  |
| 12            | 6             | 0           | 9.461977                | 2.685602  | 1.251783  |
| 13            | 6             | 0           | 8.624432                | 1.646684  | 0.892350  |
| 14            | 6             | 0           | 7.293432                | 2.096703  | 1.063332  |
| 15            | 1             | 0           | 9.996454                | 5.318591  | 2.175754  |
| 16            | 1             | 0           | 10.543347               | 2.701445  | 1.242299  |
| 17            | 1             | 0           | 9.006102                | 7.816369  | 3.070269  |
| 18            | 1             | 0           | 8.903762                | 0.663880  | 0.539242  |
| 19            | 1             | 0           | 6.480090                | 8.732716  | 3.407578  |
| 20            | 6             | 0           | 6.041291                | 1.308470  | 0.849747  |
| 21            | 1             | 0           | 5.218801                | 1.983868  | 0.605251  |
| 22            | 1             | 0           | 6.197460                | 0.653971  | -0.014227 |
| 23            | 6             | 0           | 4.414188                | 6.761596  | 2.664341  |
| 24            | 1             | 0           | 4.010628                | 5.756187  | 2.801182  |
| 25            | 1             | 0           | 4.080528                | 7.368318  | 3.512732  |
| 26            | 6             | 0           | 3.883069                | 7.365487  | 1.354902  |
| 27            | 1             | 0           | 4.179343                | 6.747853  | 0.504148  |
| 28            | 1             | 0           | 2.790878                | 7.416250  | 1.381783  |
| 29            | 1             | 0           | 4.269285                | 8.378158  | 1.203294  |
| 30            | 6             | 0           | 5.677083                | 0.463589  | 2.080573  |
| 31            | 1             | 0           | 6.486019                | -0.227393 | 2.337116  |
| 32            | 1             | 0           | 5.483261                | 1.108799  | 2.940324  |
| 33            | 1             | 0           | 4.776661                | -0.123507 | 1.878732  |

DFT B3LYP/6-31G(d) optimised 1<sup>st</sup> excited-state structure:

| Center Number | Atomic Number | Atomic Type | Coordinates (Angstroms) |          |          |
|---------------|---------------|-------------|-------------------------|----------|----------|
|               |               |             | X                       | Y        | Z        |
| 1             | 5             | 0           | 6.103968                | 4.272376 | 1.831461 |
| 2             | 9             | 0           | 5.335159                | 4.428226 | 0.673779 |
| 3             | 9             | 0           | 5.321538                | 3.705029 | 2.842078 |
| 4             | 7             | 0           | 6.664294                | 5.644481 | 2.307649 |
| 5             | 7             | 0           | 7.340026                | 3.376892 | 1.525381 |
| 6             | 6             | 0           | 5.931696                | 6.712176 | 2.706554 |
| 7             | 6             | 0           | 6.821251                | 7.760629 | 3.083079 |



|    |   |   |           |           |          |
|----|---|---|-----------|-----------|----------|
| 8  | 6 | 0 | 8.128445  | 7.304989  | 2.908618 |
| 9  | 6 | 0 | 8.035650  | 5.979655  | 2.428462 |
| 10 | 6 | 0 | 9.043006  | 5.051874  | 2.110662 |
| 11 | 6 | 0 | 8.695686  | 3.764846  | 1.663970 |
| 12 | 6 | 0 | 9.510674  | 2.680315  | 1.270012 |
| 13 | 6 | 0 | 8.650340  | 1.649930  | 0.889242 |
| 14 | 6 | 0 | 7.310071  | 2.107069  | 1.053757 |
| 15 | 1 | 0 | 10.085456 | 5.328263  | 2.209913 |
| 16 | 1 | 0 | 10.592206 | 2.681006  | 1.263905 |
| 17 | 1 | 0 | 9.050184  | 7.835616  | 3.105035 |
| 18 | 1 | 0 | 8.924471  | 0.668490  | 0.523045 |
| 19 | 1 | 0 | 6.508299  | 8.731862  | 3.445362 |
| 20 | 6 | 0 | 6.053830  | 1.342069  | 0.794222 |
| 21 | 1 | 0 | 5.288554  | 2.027701  | 0.415714 |
| 22 | 1 | 0 | 6.258568  | 0.606451  | 0.006456 |
| 23 | 6 | 0 | 4.438561  | 6.748050  | 2.704533 |
| 24 | 1 | 0 | 4.056026  | 5.758085  | 2.974051 |
| 25 | 1 | 0 | 4.112821  | 7.451767  | 3.480598 |
| 26 | 6 | 0 | 3.835861  | 7.175483  | 1.344763 |
| 27 | 1 | 0 | 4.122461  | 6.463043  | 0.568607 |
| 28 | 1 | 0 | 2.742196  | 7.198761  | 1.413922 |
| 29 | 1 | 0 | 4.181991  | 8.173878  | 1.055675 |
| 30 | 6 | 0 | 5.510165  | 0.610418  | 2.044804 |
| 31 | 1 | 0 | 6.245091  | -0.101158 | 2.436794 |
| 32 | 1 | 0 | 5.267480  | 1.334484  | 2.825180 |
| 33 | 1 | 0 | 4.601085  | 0.055880  | 1.784992 |

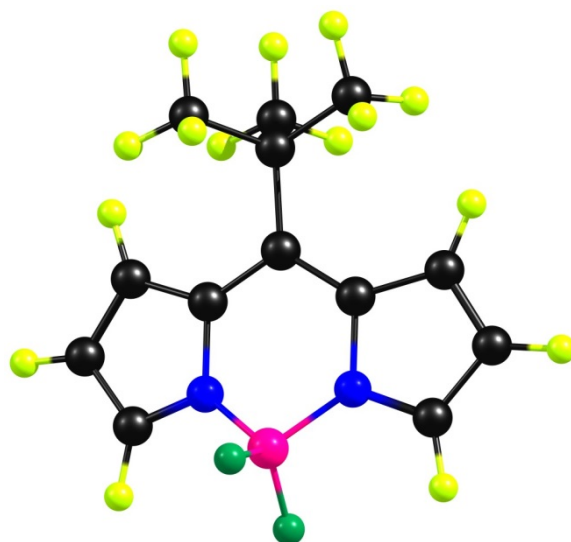

Figure S-34: DFT B3LYP/6-31G(d) optimised ground-state structure of **5.01**

**DFT B3LYP/6-31G(d) optimised ground state structure:**

| Center Number | Atomic Number | Atomic Type | Coordinates (Angstroms) |          |          |
|---------------|---------------|-------------|-------------------------|----------|----------|
|               |               |             | X                       | Y        | Z        |
| 1             | 5             | 0           | 6.157956                | 4.170384 | 2.288274 |
| 2             | 9             | 0           | 5.039725                | 4.103177 | 1.477940 |
| 3             | 9             | 0           | 5.897188                | 3.696273 | 3.563610 |
| 4             | 7             | 0           | 6.699237                | 5.623563 | 2.355906 |
| 5             | 7             | 0           | 7.334735                | 3.376765 | 1.651632 |
| 6             | 6             | 0           | 5.951605                | 6.715767 | 2.553213 |
| 7             | 6             | 0           | 6.777649                | 7.836151 | 2.748881 |
| 8             | 1             | 0           | 6.448043                | 8.852698 | 2.912987 |
| 9             | 6             | 0           | 8.085533                | 7.378612 | 2.676479 |
| 10            | 6             | 0           | 8.050699                | 5.973858 | 2.419624 |
| 11            | 6             | 0           | 9.074672                | 5.018218 | 2.162843 |
| 12            | 6             | 0           | 8.691080                | 3.730533 | 1.709511 |

|    |   |   |           |          |          |
|----|---|---|-----------|----------|----------|
| 13 | 6 | 0 | 9.408099  | 2.628362 | 1.140730 |
| 14 | 1 | 0 | 10.469831 | 2.552998 | 0.994402 |
| 15 | 6 | 0 | 8.487757  | 1.667741 | 0.754970 |
| 16 | 1 | 0 | 8.694284  | 0.721142 | 0.275122 |
| 17 | 6 | 0 | 7.218294  | 2.167547 | 1.097263 |
| 18 | 1 | 0 | 6.241936  | 1.717978 | 0.975443 |
| 19 | 1 | 0 | 4.872359  | 6.643572 | 2.551780 |
| 20 | 1 | 0 | 8.964442  | 7.995785 | 2.769645 |
| 21 | 6 | 0 | 10.550726 | 5.446100 | 2.375414 |
| 22 | 6 | 0 | 11.600378 | 4.321342 | 2.236000 |
| 23 | 1 | 0 | 11.357926 | 3.444754 | 2.843152 |
| 24 | 1 | 0 | 11.745334 | 4.012535 | 1.197705 |
| 25 | 1 | 0 | 12.562898 | 4.710090 | 2.584860 |
| 26 | 6 | 0 | 10.716836 | 5.971902 | 3.830070 |
| 27 | 1 | 0 | 10.048620 | 6.794681 | 4.078748 |
| 28 | 1 | 0 | 10.525497 | 5.165505 | 4.547094 |
| 29 | 1 | 0 | 11.748408 | 6.312030 | 3.974940 |
| 30 | 6 | 0 | 10.944235 | 6.528034 | 1.333702 |
| 31 | 1 | 0 | 10.337380 | 7.431360 | 1.393799 |
| 32 | 1 | 0 | 11.992551 | 6.811340 | 1.483318 |
| 33 | 1 | 0 | 10.845388 | 6.130418 | 0.317432 |

DFT B3LYP/6-31++G(d,p) optimised ground state structure:

| Center<br>Number | Atomic<br>Number | Atomic<br>Type | Coordinates (Angstroms) |          |          |
|------------------|------------------|----------------|-------------------------|----------|----------|
|                  |                  |                | X                       | Y        | Z        |
| 1                | 5                | 0              | 6.138828                | 4.200965 | 2.182616 |
| 2                | 9                | 0              | 5.082005                | 4.178108 | 1.273345 |
| 3                | 9                | 0              | 5.729668                | 3.702839 | 3.423554 |
| 4                | 7                | 0              | 6.698919                | 5.633405 | 2.338791 |
| 5                | 7                | 0              | 7.334637                | 3.374278 | 1.644999 |
| 6                | 6                | 0              | 5.957930                | 6.722909 | 2.570025 |
| 7                | 6                | 0              | 6.791486                | 7.828341 | 2.801326 |
| 8                | 1                | 0              | 6.468903                | 8.837733 | 3.001909 |
| 9                | 6                | 0              | 8.094812                | 7.365157 | 2.714839 |
| 10               | 6                | 0              | 8.052863                | 5.971338 | 2.416387 |
| 11               | 6                | 0              | 9.074973                | 5.017641 | 2.157638 |
| 12               | 6                | 0              | 8.690609                | 3.726362 | 1.721409 |
| 13               | 6                | 0              | 9.413289                | 2.600088 | 1.215133 |
| 14               | 1                | 0              | 10.475040               | 2.510932 | 1.103583 |
| 15               | 6                | 0              | 8.499255                | 1.627247 | 0.850742 |
| 16               | 1                | 0              | 8.712364                | 0.660426 | 0.422966 |
| 17               | 6                | 0              | 7.225764                | 2.142853 | 1.140952 |
| 18               | 1                | 0              | 6.254320                | 1.689063 | 1.014200 |
| 19               | 1                | 0              | 4.880086                | 6.662928 | 2.564759 |
| 20               | 1                | 0              | 8.973650                | 7.972302 | 2.834352 |
| 21               | 6                | 0              | 10.550684               | 5.452623 | 2.359277 |
| 22               | 6                | 0              | 11.610942               | 4.347001 | 2.172714 |
| 23               | 1                | 0              | 11.425142               | 3.477605 | 2.805019 |
| 24               | 1                | 0              | 11.701594               | 4.029836 | 1.133624 |
| 25               | 1                | 0              | 12.579883               | 4.761224 | 2.461599 |
| 26               | 6                | 0              | 10.735715               | 5.945118 | 3.822344 |
| 27               | 1                | 0              | 10.086124               | 6.772793 | 4.092127 |
| 28               | 1                | 0              | 10.536147               | 5.129378 | 4.522587 |
| 29               | 1                | 0              | 11.772181               | 6.262573 | 3.964899 |
| 30               | 6                | 0              | 10.917204               | 6.560808 | 1.335419 |
| 31               | 1                | 0              | 10.301020               | 7.452309 | 1.418069 |
| 32               | 1                | 0              | 11.961032               | 6.852963 | 1.480304 |
| 33               | 1                | 0              | 10.814233               | 6.182069 | 0.314985 |

DFT mpw1pw91/6-31++G(d,p) optimised ground state structure:

| Center<br>Number | Atomic<br>Number | Atomic<br>Type | Coordinates (Angstroms) |          |          |
|------------------|------------------|----------------|-------------------------|----------|----------|
|                  |                  |                | X                       | Y        | Z        |
| 1                | 5                | 0              | 6.152160                | 4.197056 | 2.190903 |

|    |   |   |           |          |          |
|----|---|---|-----------|----------|----------|
| 2  | 9 | 0 | 5.096829  | 4.166410 | 1.290803 |
| 3  | 9 | 0 | 5.757095  | 3.706589 | 3.431091 |
| 4  | 7 | 0 | 6.707790  | 5.627079 | 2.334851 |
| 5  | 7 | 0 | 7.344731  | 3.376493 | 1.651400 |
| 6  | 6 | 0 | 5.967469  | 6.711508 | 2.557293 |
| 7  | 6 | 0 | 6.795668  | 7.817006 | 2.783962 |
| 8  | 1 | 0 | 6.471352  | 8.826723 | 2.977864 |
| 9  | 6 | 0 | 8.095967  | 7.355259 | 2.703187 |
| 10 | 1 | 0 | 8.975235  | 7.962904 | 2.821260 |
| 11 | 6 | 0 | 8.052538  | 5.965132 | 2.413232 |
| 12 | 6 | 0 | 9.072823  | 5.015166 | 2.159367 |
| 13 | 6 | 0 | 8.691803  | 3.726882 | 1.727712 |
| 14 | 6 | 0 | 9.416273  | 2.607355 | 1.223987 |
| 15 | 1 | 0 | 10.478803 | 2.521335 | 1.113051 |
| 16 | 6 | 0 | 8.506276  | 1.636137 | 0.859618 |
| 17 | 1 | 0 | 8.719855  | 0.670107 | 0.431312 |
| 18 | 6 | 0 | 7.236342  | 2.150624 | 1.149665 |
| 19 | 1 | 0 | 6.264438  | 1.698082 | 1.023476 |
| 20 | 1 | 0 | 4.890030  | 6.648041 | 2.549746 |
| 21 | 6 | 0 | 10.536012 | 5.450480 | 2.358451 |
| 22 | 6 | 0 | 11.591161 | 4.351955 | 2.179234 |
| 23 | 1 | 0 | 11.401543 | 3.482753 | 2.810176 |
| 24 | 1 | 0 | 11.689532 | 4.037229 | 1.140294 |
| 25 | 1 | 0 | 12.557066 | 4.767437 | 2.474875 |
| 26 | 6 | 0 | 10.714956 | 5.945617 | 3.810947 |
| 27 | 1 | 0 | 10.053501 | 6.763463 | 4.081045 |
| 28 | 1 | 0 | 10.528000 | 5.128415 | 4.511901 |
| 29 | 1 | 0 | 11.746870 | 6.277027 | 3.950647 |
| 30 | 6 | 0 | 10.897284 | 6.546957 | 1.334859 |
| 31 | 1 | 0 | 10.275824 | 7.435193 | 1.408351 |
| 32 | 1 | 0 | 11.938787 | 6.844349 | 1.481491 |
| 33 | 1 | 0 | 10.799475 | 6.160178 | 0.317697 |

DFT wb97xd/6-31++G(d,p) optimised ground state structure:

| Center<br>Number | Atomic<br>Number | Atomic<br>Type | Coordinates (Angstroms) |          |          |
|------------------|------------------|----------------|-------------------------|----------|----------|
|                  |                  |                | X                       | Y        | Z        |
| 1                | 5                | 0              | 6.159545                | 4.195247 | 2.217634 |
| 2                | 9                | 0              | 5.078499                | 4.153787 | 1.342071 |
| 3                | 9                | 0              | 5.801412                | 3.704864 | 3.473812 |
| 4                | 7                | 0              | 6.709416                | 5.630353 | 2.341998 |
| 5                | 7                | 0              | 7.344942                | 3.380519 | 1.649417 |
| 6                | 6                | 0              | 5.966933                | 6.714652 | 2.567658 |
| 7                | 6                | 0              | 6.794871                | 7.824878 | 2.783927 |
| 8                | 1                | 0              | 6.470403                | 8.837098 | 2.974373 |
| 9                | 6                | 0              | 8.098041                | 7.365081 | 2.696264 |
| 10               | 6                | 0              | 8.056988                | 5.972530 | 2.412360 |
| 11               | 6                | 0              | 9.078096                | 5.019624 | 2.153907 |
| 12               | 6                | 0              | 8.696627                | 3.731560 | 1.714995 |
| 13               | 6                | 0              | 9.415091                | 2.617405 | 1.185754 |
| 14               | 1                | 0              | 10.477042               | 2.531067 | 1.051830 |
| 15               | 6                | 0              | 8.499657                | 1.648919 | 0.820185 |
| 16               | 1                | 0              | 8.708964                | 0.688244 | 0.373871 |
| 17               | 6                | 0              | 7.231175                | 2.159302 | 1.135105 |
| 18               | 1                | 0              | 6.256837                | 1.705298 | 1.018170 |
| 19               | 1                | 0              | 4.888029                | 6.645985 | 2.569368 |
| 20               | 1                | 0              | 8.976441                | 7.979893 | 2.803869 |
| 21               | 6                | 0              | 10.545929               | 5.450575 | 2.363572 |
| 22               | 6                | 0              | 11.597920               | 4.340223 | 2.196925 |
| 23               | 1                | 0              | 11.385388               | 3.467891 | 2.819686 |
| 24               | 1                | 0              | 11.713380               | 4.032524 | 1.155638 |
| 25               | 1                | 0              | 12.563813               | 4.744283 | 2.513513 |
| 26               | 6                | 0              | 10.712963               | 5.950092 | 3.820511 |
| 27               | 1                | 0              | 10.059585               | 6.780268 | 4.078960 |
| 28               | 1                | 0              | 10.502999               | 5.136404 | 4.521948 |
| 29               | 1                | 0              | 11.748509               | 6.269619 | 3.973675 |
| 30               | 6                | 0              | 10.918107               | 6.544246 | 1.335269 |
| 31               | 1                | 0              | 10.317711               | 7.447966 | 1.422089 |
| 32               | 1                | 0              | 11.969031               | 6.819122 | 1.471252 |
| 33               | 1                | 0              | 10.796953               | 6.161698 | 0.316886 |

**DFT B3LYP/6-31G(d) optimised 1<sup>st</sup> excited-state structure:**

| Center Number | Atomic Number | Atomic Type | Coordinates (Angstroms) |          |           |
|---------------|---------------|-------------|-------------------------|----------|-----------|
|               |               |             | X                       | Y        | Z         |
| 1             | 5             | 0           | 6.433366                | 3.961574 | 2.778035  |
| 2             | 9             | 0           | 5.113893                | 3.722624 | 2.451580  |
| 3             | 9             | 0           | 6.794212                | 3.430458 | 4.000621  |
| 4             | 7             | 0           | 6.723840                | 5.497857 | 2.761795  |
| 5             | 7             | 0           | 7.373632                | 3.480620 | 1.644554  |
| 6             | 6             | 0           | 5.833005                | 6.513279 | 2.758686  |
| 7             | 6             | 0           | 6.517393                | 7.697568 | 2.531037  |
| 8             | 1             | 0           | 6.109774                | 8.699479 | 2.556343  |
| 9             | 6             | 0           | 7.928558                | 7.338873 | 2.324710  |
| 10            | 6             | 0           | 8.035234                | 5.996118 | 2.503236  |
| 11            | 6             | 0           | 9.151755                | 5.046056 | 2.208154  |
| 12            | 6             | 0           | 8.726607                | 3.905571 | 1.526652  |
| 13            | 6             | 0           | 9.337627                | 3.036879 | 0.566521  |
| 14            | 1             | 0           | 10.348591               | 3.120505 | 0.196453  |
| 15            | 6             | 0           | 8.358944                | 2.163341 | 0.106128  |
| 16            | 1             | 0           | 8.478828                | 1.386905 | -0.638223 |
| 17            | 6             | 0           | 7.164538                | 2.460721 | 0.794598  |
| 18            | 1             | 0           | 6.202403                | 1.969740 | 0.754348  |
| 19            | 1             | 0           | 4.782127                | 6.324600 | 2.917896  |
| 20            | 1             | 0           | 8.718053                | 8.029698 | 2.068452  |
| 21            | 6             | 0           | 10.606950               | 5.395042 | 2.514448  |
| 22            | 6             | 0           | 11.427422               | 4.120565 | 2.828442  |
| 23            | 1             | 0           | 10.990097               | 3.577078 | 3.672659  |
| 24            | 1             | 0           | 11.483943               | 3.432036 | 1.983468  |
| 25            | 1             | 0           | 12.452594               | 4.401243 | 3.096349  |
| 26            | 6             | 0           | 10.702628               | 6.298171 | 3.768091  |
| 27            | 1             | 0           | 10.242598               | 7.277894 | 3.622448  |
| 28            | 1             | 0           | 10.218721               | 5.826373 | 4.630340  |
| 29            | 1             | 0           | 11.757343               | 6.459368 | 4.018296  |
| 30            | 6             | 0           | 11.255497               | 6.130715 | 1.309999  |
| 31            | 1             | 0           | 10.728229               | 7.061354 | 1.073613  |
| 32            | 1             | 0           | 12.299025               | 6.383608 | 1.535751  |
| 33            | 1             | 0           | 11.243873               | 5.505305 | 0.411013  |

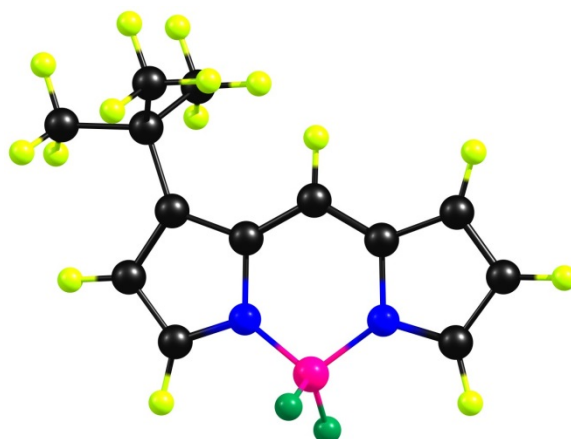

Figure S-35: DFT B3LYP/6-31G(d) optimised ground-state structure of 5.02

**DFT B3LYP/6-31G(d) optimised ground state structure:**

| Center Number | Atomic Number | Atomic Type | Coordinates (Angstroms) |   |   |
|---------------|---------------|-------------|-------------------------|---|---|
|               |               |             | X                       | Y | Z |

|    |   |   |           |           |          |
|----|---|---|-----------|-----------|----------|
| 1  | 5 | 0 | 6.141108  | 4.145950  | 2.066256 |
| 2  | 9 | 0 | 5.182326  | 4.273019  | 1.080866 |
| 3  | 9 | 0 | 5.634710  | 3.533740  | 3.197890 |
| 4  | 7 | 0 | 6.710159  | 5.565377  | 2.444667 |
| 5  | 7 | 0 | 7.373605  | 3.338980  | 1.528549 |
| 6  | 6 | 0 | 5.981792  | 6.616217  | 2.827660 |
| 7  | 6 | 0 | 6.820435  | 7.692798  | 3.180939 |
| 8  | 1 | 0 | 6.477108  | 8.658969  | 3.520811 |
| 9  | 6 | 0 | 8.139843  | 7.282123  | 3.005475 |
| 10 | 6 | 0 | 8.059257  | 5.924883  | 2.532286 |
| 11 | 6 | 0 | 9.025226  | 5.006191  | 2.135178 |
| 12 | 6 | 0 | 8.700730  | 3.745475  | 1.633076 |
| 13 | 6 | 0 | 9.522843  | 2.710524  | 1.118267 |
| 14 | 1 | 0 | 10.603195 | 2.740312  | 1.059622 |
| 15 | 6 | 0 | 8.677720  | 1.688515  | 0.703496 |
| 16 | 1 | 0 | 8.954587  | 0.745243  | 0.253226 |
| 17 | 6 | 0 | 7.361309  | 2.116994  | 0.975731 |
| 18 | 1 | 0 | 6.425386  | 1.603538  | 0.799915 |
| 19 | 1 | 0 | 4.901033  | 6.562211  | 2.837652 |
| 20 | 1 | 0 | 10.074022 | 5.273041  | 2.191539 |
| 21 | 6 | 0 | 9.393300  | 8.110071  | 3.255234 |
| 22 | 6 | 0 | 9.012962  | 9.510283  | 3.777546 |
| 23 | 1 | 0 | 8.454281  | 9.450227  | 4.718140 |
| 24 | 1 | 0 | 9.919268  | 10.096888 | 3.964190 |
| 25 | 1 | 0 | 8.403884  | 10.059438 | 3.050972 |
| 26 | 6 | 0 | 10.190044 | 8.290275  | 1.939176 |
| 27 | 1 | 0 | 10.539623 | 7.337602  | 1.529671 |
| 28 | 1 | 0 | 9.573478  | 8.774225  | 1.173871 |
| 29 | 1 | 0 | 11.070229 | 8.920087  | 2.115798 |
| 30 | 6 | 0 | 10.284975 | 7.426672  | 4.320875 |
| 31 | 1 | 0 | 9.741290  | 7.304489  | 5.264001 |
| 32 | 1 | 0 | 10.625966 | 6.436199  | 4.004688 |
| 33 | 1 | 0 | 11.173454 | 8.038879  | 4.516678 |

DFT B3LYP/6-31++G(d,p) optimised ground state structure:

| Center<br>Number | Atomic<br>Number | Atomic<br>Type | Coordinates (Angstroms) |           |          |
|------------------|------------------|----------------|-------------------------|-----------|----------|
|                  |                  |                | X                       | Y         | Z        |
| 1                | 5                | 0              | 6.138084                | 4.194651  | 1.948128 |
| 2                | 9                | 0              | 5.305737                | 4.396986  | 0.848277 |
| 3                | 9                | 0              | 5.442446                | 3.572527  | 2.983725 |
| 4                | 7                | 0              | 6.710487                | 5.569662  | 2.442310 |
| 5                | 7                | 0              | 7.377205                | 3.336087  | 1.537298 |
| 6                | 6                | 0              | 5.985939                | 6.597691  | 2.885983 |
| 7                | 6                | 0              | 6.826431                | 7.669037  | 3.245074 |
| 8                | 1                | 0              | 6.484748                | 8.614902  | 3.632277 |
| 9                | 6                | 0              | 8.141335                | 7.278889  | 3.009409 |
| 10               | 6                | 0              | 8.058895                | 5.937773  | 2.497127 |
| 11               | 6                | 0              | 9.022754                | 5.029045  | 2.084056 |
| 12               | 6                | 0              | 8.699916                | 3.757513  | 1.614320 |
| 13               | 6                | 0              | 9.525674                | 2.702464  | 1.154037 |
| 14               | 1                | 0              | 10.603424               | 2.732614  | 1.096026 |
| 15               | 6                | 0              | 8.686564                | 1.652618  | 0.803391 |
| 16               | 1                | 0              | 8.968498                | 0.687509  | 0.412963 |
| 17               | 6                | 0              | 7.369689                | 2.084352  | 1.055061 |
| 18               | 1                | 0              | 6.440302                | 1.554156  | 0.910666 |
| 19               | 1                | 0              | 4.908608                | 6.535955  | 2.931870 |
| 20               | 1                | 0              | 10.068384               | 5.301738  | 2.121642 |
| 21               | 6                | 0              | 9.393532                | 8.110471  | 3.249372 |
| 22               | 6                | 0              | 9.015653                | 9.496088  | 3.808643 |
| 23               | 1                | 0              | 8.489068                | 9.414606  | 4.763078 |
| 24               | 1                | 0              | 9.920736                | 10.085273 | 3.977445 |
| 25               | 1                | 0              | 8.382189                | 10.051744 | 3.112334 |
| 26               | 6                | 0              | 10.159813               | 8.322736  | 1.921061 |
| 27               | 1                | 0              | 10.507027               | 7.383030  | 1.487611 |
| 28               | 1                | 0              | 9.524721                | 8.815518  | 1.180514 |
| 29               | 1                | 0              | 11.036313               | 8.954832  | 2.092104 |
| 30               | 6                | 0              | 10.312509               | 7.411884  | 4.280926 |
| 31               | 1                | 0              | 9.786457                | 7.254017  | 5.225878 |
| 32               | 1                | 0              | 10.665226               | 6.439901  | 3.931179 |
| 33               | 1                | 0              | 11.190783               | 8.033168  | 4.480157 |

-----  
**DFT mpw1pw91/6-31++G(d,p) optimised ground state structure:**

| Center<br>Number | Atomic<br>Number | Atomic<br>Type | Coordinates (Angstroms) |           |          |
|------------------|------------------|----------------|-------------------------|-----------|----------|
|                  |                  |                | X                       | Y         | Z        |
| 1                | 5                | 0              | 6.148908                | 4.204063  | 1.951209 |
| 2                | 9                | 0              | 5.321827                | 4.406116  | 0.855948 |
| 3                | 9                | 0              | 5.458451                | 3.585035  | 2.982984 |
| 4                | 7                | 0              | 6.720326                | 5.573239  | 2.442978 |
| 5                | 7                | 0              | 7.384318                | 3.349851  | 1.542126 |
| 6                | 6                | 0              | 5.997521                | 6.595950  | 2.884338 |
| 7                | 6                | 0              | 6.833825                | 7.665798  | 3.243131 |
| 8                | 1                | 0              | 6.493181                | 8.612013  | 3.630303 |
| 9                | 6                | 0              | 8.144094                | 7.275535  | 3.007869 |
| 10               | 6                | 0              | 8.060369                | 5.939887  | 2.497855 |
| 11               | 6                | 0              | 9.023287                | 5.035433  | 2.086573 |
| 12               | 6                | 0              | 8.699926                | 3.767505  | 1.618219 |
| 13               | 6                | 0              | 9.523939                | 2.716753  | 1.159792 |
| 14               | 1                | 0              | 10.601354               | 2.747284  | 1.101996 |
| 15               | 6                | 0              | 8.686536                | 1.670517  | 0.810371 |
| 16               | 1                | 0              | 8.966674                | 0.705278  | 0.420031 |
| 17               | 6                | 0              | 7.374698                | 2.103896  | 1.062199 |
| 18               | 1                | 0              | 6.444019                | 1.576158  | 0.918755 |
| 19               | 1                | 0              | 4.920511                | 6.531674  | 2.929125 |
| 20               | 1                | 0              | 10.068583               | 5.309010  | 2.124608 |
| 21               | 6                | 0              | 9.390275                | 8.101044  | 3.245919 |
| 22               | 6                | 0              | 9.012664                | 9.477815  | 3.801622 |
| 23               | 1                | 0              | 8.486037                | 9.394761  | 4.755256 |
| 24               | 1                | 0              | 9.916482                | 10.067669 | 3.970845 |
| 25               | 1                | 0              | 8.379375                | 10.031739 | 3.104654 |
| 26               | 6                | 0              | 10.149633               | 8.310514  | 1.924410 |
| 27               | 1                | 0              | 10.494503               | 7.370881  | 1.490386 |
| 28               | 1                | 0              | 9.513861                | 8.803495  | 1.185654 |
| 29               | 1                | 0              | 11.026591               | 8.941201  | 2.094153 |
| 30               | 6                | 0              | 10.301295               | 7.404712  | 4.271613 |
| 31               | 1                | 0              | 9.774241                | 7.248357  | 5.215414 |
| 32               | 1                | 0              | 10.651697               | 6.432208  | 3.922786 |
| 33               | 1                | 0              | 11.180148               | 8.024044  | 4.470820 |

-----  
**DFT wb97xd/6-31++G(d,p) optimised ground state structure:**

| Center<br>Number | Atomic<br>Number | Atomic<br>Type | Coordinates (Angstroms) |          |          |
|------------------|------------------|----------------|-------------------------|----------|----------|
|                  |                  |                | X                       | Y        | Z        |
| 1                | 5                | 0              | 6.146274                | 4.202042 | 1.949104 |
| 2                | 9                | 0              | 5.317331                | 4.405628 | 0.849907 |
| 3                | 9                | 0              | 5.453078                | 3.581920 | 2.984392 |
| 4                | 7                | 0              | 6.717014                | 5.572873 | 2.441917 |
| 5                | 7                | 0              | 7.382920                | 3.348307 | 1.540877 |
| 6                | 6                | 0              | 5.993417                | 6.595538 | 2.883353 |
| 7                | 6                | 0              | 6.830210                | 7.668475 | 3.243884 |
| 8                | 1                | 0              | 6.488098                | 8.616256 | 3.631765 |
| 9                | 6                | 0              | 8.141741                | 7.278473 | 3.009052 |
| 10               | 6                | 0              | 8.060995                | 5.942155 | 2.498211 |
| 11               | 6                | 0              | 9.025243                | 5.037117 | 2.087295 |
| 12               | 6                | 0              | 8.702528                | 3.765612 | 1.617426 |
| 13               | 6                | 0              | 9.526293                | 2.713981 | 1.158885 |
| 14               | 1                | 0              | 10.605904               | 2.744273 | 1.101503 |
| 15               | 6                | 0              | 8.686364                | 1.665825 | 0.808041 |
| 16               | 1                | 0              | 8.966766                | 0.698934 | 0.416920 |
| 17               | 6                | 0              | 7.373068                | 2.100970 | 1.060055 |
| 18               | 1                | 0              | 6.438788                | 1.575949 | 0.917217 |
| 19               | 1                | 0              | 4.914776                | 6.527818 | 2.926531 |
| 20               | 1                | 0              | 10.073366               | 5.310001 | 2.125574 |
| 21               | 6                | 0              | 9.392539                | 8.104169 | 3.247639 |
| 22               | 6                | 0              | 9.014358                | 9.485022 | 3.805101 |

|    |   |   |           |           |          |
|----|---|---|-----------|-----------|----------|
| 23 | 1 | 0 | 8.485545  | 9.399794  | 4.759812 |
| 24 | 1 | 0 | 9.920330  | 10.075039 | 3.975331 |
| 25 | 1 | 0 | 8.380157  | 10.038819 | 3.105485 |
| 26 | 6 | 0 | 10.152559 | 8.311490  | 1.921931 |
| 27 | 1 | 0 | 10.506889 | 7.369652  | 1.494956 |
| 28 | 1 | 0 | 9.511264  | 8.794674  | 1.178480 |
| 29 | 1 | 0 | 11.026161 | 8.950743  | 2.089411 |
| 30 | 6 | 0 | 10.303386 | 7.402638  | 4.275433 |
| 31 | 1 | 0 | 9.769984  | 7.235361  | 5.216150 |
| 32 | 1 | 0 | 10.662235 | 6.433652  | 3.918740 |
| 33 | 1 | 0 | 11.179566 | 8.026238  | 4.483564 |

**DFT B3LYP/6-31G(d) optimised 1<sup>st</sup> excited-state structure:**

| Center Number | Atomic Number | Atomic Type | Coordinates (Angstroms) |           |           |
|---------------|---------------|-------------|-------------------------|-----------|-----------|
|               |               |             | X                       | Y         | Z         |
| 1             | 5             | 0           | 6.223142                | 4.084834  | 2.289109  |
| 2             | 9             | 0           | 5.091598                | 4.050918  | 1.498556  |
| 3             | 9             | 0           | 6.022009                | 3.462958  | 3.511375  |
| 4             | 7             | 0           | 6.757015                | 5.520422  | 2.445085  |
| 5             | 7             | 0           | 7.392137                | 3.319073  | 1.559859  |
| 6             | 6             | 0           | 5.999864                | 6.607708  | 2.701937  |
| 7             | 6             | 0           | 6.821903                | 7.695471  | 3.039504  |
| 8             | 1             | 0           | 6.461885                | 8.683097  | 3.291104  |
| 9             | 6             | 0           | 8.154002                | 7.279780  | 2.993196  |
| 10            | 6             | 0           | 8.116822                | 5.887367  | 2.590016  |
| 11            | 6             | 0           | 9.104311                | 4.980485  | 2.278297  |
| 12            | 6             | 0           | 8.742290                | 3.703124  | 1.659021  |
| 13            | 6             | 0           | 9.481999                | 2.765417  | 1.021121  |
| 14            | 1             | 0           | 10.556311               | 2.751993  | 0.895440  |
| 15            | 6             | 0           | 8.527927                | 1.739322  | 0.488813  |
| 16            | 1             | 0           | 8.799154                | 0.842815  | -0.051699 |
| 17            | 6             | 0           | 7.272383                | 2.153945  | 0.841302  |
| 18            | 1             | 0           | 6.301733                | 1.715563  | 0.670276  |
| 19            | 1             | 0           | 4.921383                | 6.548708  | 2.656918  |
| 20            | 1             | 0           | 10.152480               | 5.216734  | 2.383823  |
| 21            | 6             | 0           | 9.389165                | 8.120841  | 3.269735  |
| 22            | 6             | 0           | 8.982291                | 9.541110  | 3.710611  |
| 23            | 1             | 0           | 8.369571                | 9.519196  | 4.618945  |
| 24            | 1             | 0           | 9.876762                | 10.137165 | 3.924402  |
| 25            | 1             | 0           | 8.416249                | 10.058920 | 2.927991  |
| 26            | 6             | 0           | 10.255065               | 8.247433  | 1.991023  |
| 27            | 1             | 0           | 10.591684               | 7.274057  | 1.621975  |
| 28            | 1             | 0           | 9.687756                | 8.728089  | 1.186185  |
| 29            | 1             | 0           | 11.143678               | 8.858107  | 2.193159  |
| 30            | 6             | 0           | 10.225149               | 7.487355  | 4.409272  |
| 31            | 1             | 0           | 9.638952                | 7.430581  | 5.333150  |
| 32            | 1             | 0           | 10.555226               | 6.472963  | 4.166345  |
| 33            | 1             | 0           | 11.117252               | 8.093885  | 4.608097  |

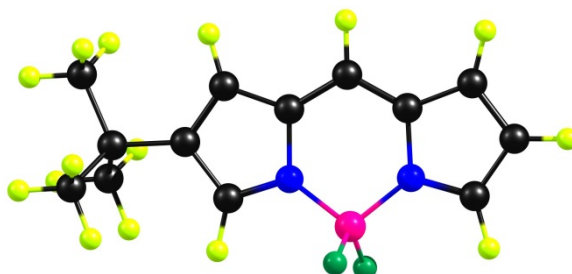

Figure S-36: DFT B3LYP/6-31G(d) optimised ground-state structure of **5.03**

**DFT B3LYP/6-31G(d) optimised ground state structure:**

| Center<br>Number | Atomic<br>Number | Atomic<br>Type | Coordinates (Angstroms) |           |          |
|------------------|------------------|----------------|-------------------------|-----------|----------|
|                  |                  |                | X                       | Y         | Z        |
| 1                | 5                | 0              | 6.124634                | 4.259821  | 1.885525 |
| 2                | 9                | 0              | 5.307451                | 4.445222  | 0.788258 |
| 3                | 9                | 0              | 5.449175                | 3.662643  | 2.932926 |
| 4                | 7                | 0              | 6.712606                | 5.643953  | 2.356627 |
| 5                | 7                | 0              | 7.375139                | 3.392440  | 1.490641 |
| 6                | 6                | 0              | 6.013801                | 6.726073  | 2.713426 |
| 7                | 6                | 0              | 6.873200                | 7.776352  | 3.143103 |
| 8                | 6                | 0              | 8.161882                | 7.266976  | 3.027822 |
| 9                | 6                | 0              | 8.063459                | 5.937790  | 2.535503 |
| 10               | 6                | 0              | 9.034939                | 4.998842  | 2.212241 |
| 11               | 6                | 0              | 8.707852                | 3.747224  | 1.691850 |
| 12               | 6                | 0              | 9.523527                | 2.671230  | 1.258010 |
| 13               | 1                | 0              | 10.605286               | 2.656149  | 1.285540 |
| 14               | 6                | 0              | 8.671497                | 1.675714  | 0.796115 |
| 15               | 1                | 0              | 8.942871                | 0.712809  | 0.386025 |
| 16               | 6                | 0              | 7.356732                | 2.161540  | 0.957887 |
| 17               | 1                | 0              | 6.417433                | 1.681687  | 0.716982 |
| 18               | 1                | 0              | 4.933247                | 6.717541  | 2.652481 |
| 19               | 1                | 0              | 10.081377               | 5.251761  | 2.355270 |
| 20               | 1                | 0              | 9.090930                | 7.771582  | 3.256712 |
| 21               | 6                | 0              | 6.420042                | 9.147965  | 3.615759 |
| 22               | 6                | 0              | 5.499953                | 8.991492  | 4.849088 |
| 23               | 1                | 0              | 5.159214                | 9.973397  | 5.199509 |
| 24               | 1                | 0              | 4.611291                | 8.394356  | 4.615154 |
| 25               | 1                | 0              | 6.026922                | 8.498470  | 5.673534 |
| 26               | 6                | 0              | 5.637764                | 9.852976  | 2.483108 |
| 27               | 1                | 0              | 5.297197                | 10.842609 | 2.811302 |
| 28               | 1                | 0              | 6.265338                | 9.985120  | 1.594703 |
| 29               | 1                | 0              | 4.753404                | 9.278028  | 2.185780 |
| 30               | 6                | 0              | 7.631989                | 10.015199 | 4.001902 |
| 31               | 1                | 0              | 8.208792                | 9.559217  | 4.815052 |
| 32               | 1                | 0              | 8.304216                | 10.167557 | 3.149402 |
| 33               | 1                | 0              | 7.297520                | 11.001485 | 4.342758 |

**DFT B3LYP/6-31++G(d,p) optimised ground state structure:**

| Center<br>Number | Atomic<br>Number | Atomic<br>Type | Coordinates (Angstroms) |           |          |
|------------------|------------------|----------------|-------------------------|-----------|----------|
|                  |                  |                | X                       | Y         | Z        |
| 1                | 5                | 0              | 6.135611                | 4.299209  | 1.792600 |
| 2                | 9                | 0              | 5.409473                | 4.519689  | 0.623972 |
| 3                | 9                | 0              | 5.334166                | 3.711576  | 2.769284 |
| 4                | 7                | 0              | 6.714373                | 5.658195  | 2.324833 |
| 5                | 7                | 0              | 7.376567                | 3.391651  | 1.494288 |
| 6                | 6                | 0              | 6.013535                | 6.730691  | 2.704212 |
| 7                | 6                | 0              | 6.874114                | 7.779498  | 3.129550 |
| 8                | 6                | 0              | 8.162602                | 7.281325  | 2.987179 |
| 9                | 6                | 0              | 8.065057                | 5.956414  | 2.484661 |
| 10               | 6                | 0              | 9.035878                | 5.019472  | 2.165845 |
| 11               | 6                | 0              | 8.707372                | 3.756575  | 1.678559 |
| 12               | 6                | 0              | 9.521281                | 2.662788  | 1.295168 |
| 13               | 1                | 0              | 10.600349               | 2.646557  | 1.327004 |
| 14               | 6                | 0              | 8.669204                | 1.646552  | 0.882396 |
| 15               | 1                | 0              | 8.940040                | 0.666446  | 0.522718 |
| 16               | 6                | 0              | 7.355974                | 2.136651  | 1.020822 |
| 17               | 1                | 0              | 6.419899                | 1.644777  | 0.802602 |
| 18               | 1                | 0              | 4.934290                | 6.716803  | 2.661025 |
| 19               | 1                | 0              | 10.080454               | 5.275656  | 2.299070 |
| 20               | 1                | 0              | 9.091088                | 7.784538  | 3.209352 |
| 21               | 6                | 0              | 6.420449                | 9.141584  | 3.626775 |
| 22               | 6                | 0              | 5.528130                | 8.964274  | 4.876795 |
| 23               | 1                | 0              | 5.192056                | 9.938184  | 5.245582 |
| 24               | 1                | 0              | 4.639326                | 8.367668  | 4.654800 |
| 25               | 1                | 0              | 6.074767                | 8.464643  | 5.680947 |
| 26               | 6                | 0              | 5.610110                | 9.852501  | 2.518541 |
| 27               | 1                | 0              | 5.274902                | 10.835412 | 2.863458 |
| 28               | 1                | 0              | 6.215937                | 9.994284  | 1.619670 |
| 29               | 1                | 0              | 4.723318                | 9.278083  | 2.237765 |



|    |   |   |          |           |          |
|----|---|---|----------|-----------|----------|
| 30 | 6 | 0 | 7.632645 | 10.013962 | 3.997472 |
| 31 | 1 | 0 | 8.227034 | 9.556872  | 4.793786 |
| 32 | 1 | 0 | 8.284652 | 10.181473 | 3.135402 |
| 33 | 1 | 0 | 7.296025 | 10.991216 | 4.353863 |

DFT mpw1pw91/6-31++G(d,p) optimised ground state structure:

| Center<br>Number | Atomic<br>Number | Atomic<br>Type | Coordinates (Angstroms) |           |          |
|------------------|------------------|----------------|-------------------------|-----------|----------|
|                  |                  |                | X                       | Y         | Z        |
| 1                | 5                | 0              | 6.139483                | 4.310569  | 1.797806 |
| 2                | 9                | 0              | 5.417349                | 4.530917  | 0.634713 |
| 3                | 9                | 0              | 5.344020                | 3.726269  | 2.771768 |
| 4                | 7                | 0              | 6.718049                | 5.663590  | 2.327140 |
| 5                | 7                | 0              | 7.375880                | 3.407315  | 1.500150 |
| 6                | 6                | 0              | 6.018806                | 6.730127  | 2.704546 |
| 7                | 6                | 0              | 6.875115                | 7.776890  | 3.128747 |
| 8                | 6                | 0              | 8.160060                | 7.281671  | 2.987012 |
| 9                | 6                | 0              | 8.060922                | 5.961113  | 2.486080 |
| 10               | 6                | 0              | 9.029676                | 5.027361  | 2.168101 |
| 11               | 6                | 0              | 8.699535                | 3.768301  | 1.682243 |
| 12               | 6                | 0              | 9.511216                | 2.678690  | 1.299903 |
| 13               | 1                | 0              | 10.589949               | 2.662464  | 1.331298 |
| 14               | 6                | 0              | 8.660356                | 1.666320  | 0.888813 |
| 15               | 1                | 0              | 8.928938                | 0.686148  | 0.528800 |
| 16               | 6                | 0              | 7.352435                | 2.158240  | 1.028661 |
| 17               | 1                | 0              | 6.414779                | 1.669267  | 0.811782 |
| 18               | 1                | 0              | 4.939637                | 6.714336  | 2.660926 |
| 19               | 1                | 0              | 10.073892               | 5.282939  | 2.300758 |
| 20               | 1                | 0              | 9.087904                | 7.785885  | 3.209277 |
| 21               | 6                | 0              | 6.422494                | 9.131306  | 3.623129 |
| 22               | 6                | 0              | 5.534722                | 8.952039  | 4.864364 |
| 23               | 1                | 0              | 5.197477                | 9.924522  | 5.233830 |
| 24               | 1                | 0              | 4.647327                | 8.355320  | 4.640175 |
| 25               | 1                | 0              | 6.080812                | 8.451722  | 5.667421 |
| 26               | 6                | 0              | 5.617973                | 9.835662  | 2.519685 |
| 27               | 1                | 0              | 5.281496                | 10.817928 | 2.863057 |
| 28               | 1                | 0              | 6.224535                | 9.976446  | 1.622082 |
| 29               | 1                | 0              | 4.732693                | 9.260065  | 2.239018 |
| 30               | 6                | 0              | 7.628622                | 9.996728  | 3.992090 |
| 31               | 1                | 0              | 8.221257                | 9.538195  | 4.788008 |
| 32               | 1                | 0              | 8.279962                | 10.163206 | 3.130120 |
| 33               | 1                | 0              | 7.293307                | 10.973669 | 4.348494 |

DFT wb97xd/6-31++G(d,p) optimised ground state structure:

| Center<br>Number | Atomic<br>Number | Atomic<br>Type | Coordinates (Angstroms) |          |          |
|------------------|------------------|----------------|-------------------------|----------|----------|
|                  |                  |                | X                       | Y        | Z        |
| 1                | 5                | 0              | 6.139267                | 4.311730 | 1.796388 |
| 2                | 9                | 0              | 5.415849                | 4.537000 | 0.629774 |
| 3                | 9                | 0              | 5.339252                | 3.728663 | 2.773603 |
| 4                | 7                | 0              | 6.721651                | 5.664448 | 2.327191 |
| 5                | 7                | 0              | 7.374195                | 3.405488 | 1.498772 |
| 6                | 6                | 0              | 6.023620                | 6.731966 | 2.704706 |
| 7                | 6                | 0              | 6.881431                | 7.779337 | 3.130059 |
| 8                | 6                | 0              | 8.167504                | 7.284884 | 2.989533 |
| 9                | 6                | 0              | 8.068851                | 5.962205 | 2.487383 |
| 10               | 6                | 0              | 9.036091                | 5.025219 | 2.168436 |
| 11               | 6                | 0              | 8.702645                | 3.763701 | 1.680966 |
| 12               | 6                | 0              | 9.511781                | 2.671726 | 1.298076 |
| 13               | 1                | 0              | 10.592586               | 2.653146 | 1.329479 |
| 14               | 6                | 0              | 8.656734                | 1.659129 | 0.885952 |
| 15               | 1                | 0              | 8.924857                | 0.677064 | 0.525234 |
| 16               | 6                | 0              | 7.348184                | 2.155046 | 1.026461 |
| 17               | 1                | 0              | 6.406667                | 1.669385 | 0.809939 |
| 18               | 1                | 0              | 4.942348                | 6.717814 | 2.660794 |

|    |   |   |           |           |          |
|----|---|---|-----------|-----------|----------|
| 19 | 1 | 0 | 10.082971 | 5.279311  | 2.301436 |
| 20 | 1 | 0 | 9.096084  | 7.792135  | 3.213827 |
| 21 | 6 | 0 | 6.422617  | 9.135506  | 3.624989 |
| 22 | 6 | 0 | 5.531591  | 8.948955  | 4.867344 |
| 23 | 1 | 0 | 5.183476  | 9.920124  | 5.235924 |
| 24 | 1 | 0 | 4.649866  | 8.341589  | 4.639147 |
| 25 | 1 | 0 | 6.082839  | 8.452455  | 5.672093 |
| 26 | 6 | 0 | 5.614092  | 9.834952  | 2.516314 |
| 27 | 1 | 0 | 5.267047  | 10.815956 | 2.858941 |
| 28 | 1 | 0 | 6.224948  | 9.979460  | 1.619665 |
| 29 | 1 | 0 | 4.734175  | 9.248576  | 2.232911 |
| 30 | 6 | 0 | 7.628209  | 10.007933 | 3.996052 |
| 31 | 1 | 0 | 8.221875  | 9.549418  | 4.794335 |
| 32 | 1 | 0 | 8.280283  | 10.175705 | 3.132003 |
| 33 | 1 | 0 | 7.287092  | 10.985192 | 4.352271 |

DFT B3LYP/6-31G(d) optimised 1<sup>st</sup> excited-state structure:

| Center<br>Number | Atomic<br>Number | Atomic<br>Type | Coordinates (Angstroms) |           |           |
|------------------|------------------|----------------|-------------------------|-----------|-----------|
|                  |                  |                | X                       | Y         | Z         |
| 1                | 5                | 0              | 6.427508                | 4.024848  | 2.760465  |
| 2                | 9                | 0              | 5.111989                | 3.898785  | 2.356466  |
| 3                | 9                | 0              | 6.615587                | 3.553295  | 4.050564  |
| 4                | 7                | 0              | 6.831345                | 5.550736  | 2.745177  |
| 5                | 7                | 0              | 7.391466                | 3.361548  | 1.754549  |
| 6                | 6                | 0              | 6.047996                | 6.581538  | 3.203202  |
| 7                | 6                | 0              | 6.769077                | 7.750277  | 3.153821  |
| 8                | 6                | 0              | 8.110215                | 7.362061  | 2.581396  |
| 9                | 6                | 0              | 8.087732                | 6.025230  | 2.353091  |
| 10               | 6                | 0              | 9.057115                | 5.124153  | 1.729721  |
| 11               | 6                | 0              | 8.667162                | 3.848656  | 1.395573  |
| 12               | 6                | 0              | 9.311079                | 2.826092  | 0.626440  |
| 13               | 1                | 0              | 10.297801               | 2.908097  | 0.191265  |
| 14               | 6                | 0              | 8.416711                | 1.768674  | 0.516600  |
| 15               | 1                | 0              | 8.567872                | 0.835970  | -0.010467 |
| 16               | 6                | 0              | 7.249821                | 2.128218  | 1.219552  |
| 17               | 1                | 0              | 6.341321                | 1.563799  | 1.376915  |
| 18               | 1                | 0              | 5.045002                | 6.384253  | 3.546388  |
| 19               | 1                | 0              | 10.034460               | 5.501844  | 1.460043  |
| 20               | 1                | 0              | 8.929995                | 8.038922  | 2.379921  |
| 21               | 6                | 0              | 6.380215                | 9.135242  | 3.569242  |
| 22               | 6                | 0              | 4.942425                | 9.171283  | 4.116125  |
| 23               | 1                | 0              | 4.674893                | 10.192383 | 4.408981  |
| 24               | 1                | 0              | 4.221211                | 8.838386  | 3.361617  |
| 25               | 1                | 0              | 4.836593                | 8.529828  | 4.997801  |
| 26               | 6                | 0              | 6.487960                | 10.078696 | 2.339044  |
| 27               | 1                | 0              | 6.233555                | 11.102120 | 2.639158  |
| 28               | 1                | 0              | 7.500907                | 10.093102 | 1.922610  |
| 29               | 1                | 0              | 5.798172                | 9.769581  | 1.547071  |
| 30               | 6                | 0              | 7.362715                | 9.631076  | 4.665272  |
| 31               | 1                | 0              | 7.308479                | 8.996209  | 5.555492  |
| 32               | 1                | 0              | 8.399555                | 9.634250  | 4.312014  |
| 33               | 1                | 0              | 7.102740                | 10.656067 | 4.954885  |

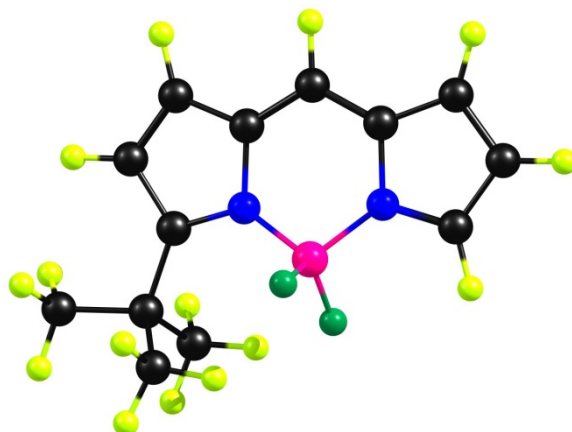

Figure S-37: DFT B3LYP/6-31G(d) optimised ground-state structure of **5.04**

**DFT B3LYP/6-31G(d) optimised ground state structure:**

| Center Number | Atomic Number | Atomic Type | Coordinates (Angstroms) |          |          |
|---------------|---------------|-------------|-------------------------|----------|----------|
|               |               |             | X                       | Y        | Z        |
| 1             | 5             | 0           | 6.217224                | 4.018783 | 2.185431 |
| 2             | 9             | 0           | 5.161415                | 3.903494 | 1.292163 |
| 3             | 9             | 0           | 5.914322                | 3.446067 | 3.409347 |
| 4             | 7             | 0           | 6.648100                | 5.529962 | 2.412084 |
| 5             | 7             | 0           | 7.456189                | 3.283690 | 1.567789 |
| 6             | 6             | 0           | 5.920598                | 6.622430 | 2.770283 |
| 7             | 6             | 0           | 6.816283                | 7.689509 | 3.070163 |
| 8             | 6             | 0           | 8.104556                | 7.230837 | 2.893698 |
| 9             | 6             | 0           | 8.005797                | 5.881375 | 2.478732 |
| 10            | 6             | 0           | 9.024317                | 5.009900 | 2.116629 |
| 11            | 6             | 0           | 8.770859                | 3.726312 | 1.641226 |
| 12            | 6             | 0           | 9.612194                | 2.716783 | 1.110989 |
| 13            | 1             | 0           | 10.689028               | 2.778937 | 1.023207 |
| 14            | 6             | 0           | 8.785932                | 1.670336 | 0.716192 |
| 15            | 1             | 0           | 9.079690                | 0.735717 | 0.258586 |
| 16            | 6             | 0           | 7.463825                | 2.060152 | 1.016826 |
| 17            | 1             | 0           | 6.538948                | 1.520341 | 0.864850 |
| 18            | 1             | 0           | 10.049725               | 5.362075 | 2.178163 |
| 19            | 1             | 0           | 9.029605                | 7.777494 | 3.024374 |
| 20            | 1             | 0           | 6.521853                | 8.681830 | 3.374995 |
| 21            | 6             | 0           | 4.398887                | 6.733686 | 2.786163 |
| 22            | 6             | 0           | 3.989464                | 8.074351 | 3.436616 |
| 23            | 1             | 0           | 4.356619                | 8.937124 | 2.870153 |
| 24            | 1             | 0           | 2.896888                | 8.141351 | 3.462263 |
| 25            | 1             | 0           | 4.353568                | 8.155522 | 4.467155 |
| 26            | 6             | 0           | 3.874113                | 6.728566 | 1.326336 |
| 27            | 1             | 0           | 4.306929                | 7.556241 | 0.752233 |
| 28            | 1             | 0           | 4.113520                | 5.790147 | 0.825776 |
| 29            | 1             | 0           | 2.784585                | 6.854422 | 1.331359 |
| 30            | 6             | 0           | 3.727812                | 5.596282 | 3.591771 |
| 31            | 1             | 0           | 3.853682                | 4.625244 | 3.117252 |
| 32            | 1             | 0           | 4.133201                | 5.536776 | 4.607457 |
| 33            | 1             | 0           | 2.653586                | 5.803375 | 3.665388 |

**DFT B3LYP/6-31++G(d,p) optimised ground state structure:**

| Center Number | Atomic Number | Atomic Type | Coordinates (Angstroms) |          |          |
|---------------|---------------|-------------|-------------------------|----------|----------|
|               |               |             | X                       | Y        | Z        |
| 1             | 5             | 0           | 6.224825                | 4.014815 | 2.176784 |
| 2             | 9             | 0           | 5.156763                | 3.898463 | 1.288069 |
| 3             | 9             | 0           | 5.918917                | 3.424013 | 3.405179 |

|    |   |   |           |          |          |
|----|---|---|-----------|----------|----------|
| 4  | 7 | 0 | 6.645081  | 5.523303 | 2.414086 |
| 5  | 7 | 0 | 7.459442  | 3.278889 | 1.562608 |
| 6  | 6 | 0 | 5.916884  | 6.616304 | 2.769678 |
| 7  | 6 | 0 | 6.812665  | 7.682842 | 3.063318 |
| 8  | 6 | 0 | 8.099370  | 7.225474 | 2.883558 |
| 9  | 6 | 0 | 8.002322  | 5.876534 | 2.472359 |
| 10 | 6 | 0 | 9.021014  | 5.012552 | 2.103287 |
| 11 | 6 | 0 | 8.769848  | 3.729445 | 1.630801 |
| 12 | 6 | 0 | 9.614309  | 2.722147 | 1.106150 |
| 13 | 1 | 0 | 10.688068 | 2.788460 | 1.016247 |
| 14 | 6 | 0 | 8.793471  | 1.668186 | 0.722509 |
| 15 | 1 | 0 | 9.091057  | 0.733329 | 0.274292 |
| 16 | 6 | 0 | 7.471418  | 2.049647 | 1.024447 |
| 17 | 1 | 0 | 6.553338  | 1.500041 | 0.882347 |
| 18 | 1 | 0 | 10.043145 | 5.367991 | 2.160233 |
| 19 | 1 | 0 | 9.021711  | 7.772778 | 3.009323 |
| 20 | 1 | 0 | 6.520785  | 8.673705 | 3.365923 |
| 21 | 6 | 0 | 4.396970  | 6.735605 | 2.789634 |
| 22 | 6 | 0 | 3.994285  | 8.073581 | 3.448914 |
| 23 | 1 | 0 | 4.359115  | 8.937060 | 2.887180 |
| 24 | 1 | 0 | 2.904309  | 8.140240 | 3.477911 |
| 25 | 1 | 0 | 4.359774  | 8.146666 | 4.476798 |
| 26 | 6 | 0 | 3.871623  | 6.745256 | 1.330362 |
| 27 | 1 | 0 | 4.315866  | 7.568092 | 0.762742 |
| 28 | 1 | 0 | 4.091373  | 5.809191 | 0.820600 |
| 29 | 1 | 0 | 2.786957  | 6.889318 | 1.339690 |
| 30 | 6 | 0 | 3.723573  | 5.599051 | 3.591201 |
| 31 | 1 | 0 | 3.868731  | 4.624380 | 3.134865 |
| 32 | 1 | 0 | 4.108082  | 5.557961 | 4.613447 |
| 33 | 1 | 0 | 2.648224  | 5.793793 | 3.641106 |

DFT mpw1pw91/6-31++G(d,p) optimised ground state structure:

| Center<br>Number | Atomic<br>Number | Atomic<br>Type | Coordinates (Angstroms) |          |          |
|------------------|------------------|----------------|-------------------------|----------|----------|
|                  |                  |                | X                       | Y        | Z        |
| 1                | 5                | 0              | 6.223457                | 4.021876 | 2.187363 |
| 2                | 9                | 0              | 5.156983                | 3.900151 | 1.307163 |
| 3                | 9                | 0              | 5.930169                | 3.435557 | 3.413214 |
| 4                | 7                | 0              | 6.641925                | 5.523977 | 2.417520 |
| 5                | 7                | 0              | 7.451899                | 3.292090 | 1.568109 |
| 6                | 6                | 0              | 5.916931                | 6.611323 | 2.768041 |
| 7                | 6                | 0              | 6.806175                | 7.676866 | 3.062356 |
| 8                | 6                | 0              | 8.089890                | 7.219866 | 2.888123 |
| 9                | 6                | 0              | 7.990859                | 5.874596 | 2.479677 |
| 10               | 6                | 0              | 9.008512                | 5.013814 | 2.114025 |
| 11               | 6                | 0              | 8.756210                | 3.735524 | 1.639345 |
| 12               | 6                | 0              | 9.597049                | 2.733854 | 1.110778 |
| 13               | 1                | 0              | 10.670635               | 2.798727 | 1.021692 |
| 14               | 6                | 0              | 8.775752                | 1.687771 | 0.721436 |
| 15               | 1                | 0              | 9.069819                | 0.755048 | 0.267354 |
| 16               | 6                | 0              | 7.459197                | 2.071919 | 1.025141 |
| 17               | 1                | 0              | 6.538521                | 1.527832 | 0.880070 |
| 18               | 1                | 0              | 10.030006               | 5.368962 | 2.173897 |
| 19               | 1                | 0              | 9.012706                | 7.765214 | 3.015795 |
| 20               | 1                | 0              | 6.510614                | 8.667237 | 3.363207 |
| 21               | 6                | 0              | 4.405839                | 6.727503 | 2.784451 |
| 22               | 6                | 0              | 4.004561                | 8.057187 | 3.438941 |
| 23               | 1                | 0              | 4.367431                | 8.919809 | 2.875532 |
| 24               | 1                | 0              | 2.915009                | 8.121932 | 3.467937 |
| 25               | 1                | 0              | 4.370070                | 8.131247 | 4.466116 |
| 26               | 6                | 0              | 3.889951                | 6.737113 | 1.332129 |
| 27               | 1                | 0              | 4.336105                | 7.559641 | 0.767042 |
| 28               | 1                | 0              | 4.111999                | 5.801063 | 0.824045 |
| 29               | 1                | 0              | 2.805839                | 6.880656 | 1.337715 |
| 30               | 6                | 0              | 3.738413                | 5.595740 | 3.578976 |
| 31               | 1                | 0              | 3.889343                | 4.622029 | 3.122772 |
| 32               | 1                | 0              | 4.118719                | 5.556678 | 4.602032 |
| 33               | 1                | 0              | 2.662731                | 5.786308 | 3.623656 |

### DFT mpw1pw91/6-31++G(d,p) optimised ground state structure:

| Center<br>Number | Atomic<br>Number | Atomic<br>Type | Coordinates (Angstroms) |          |          |
|------------------|------------------|----------------|-------------------------|----------|----------|
|                  |                  |                | X                       | Y        | Z        |
| 1                | 5                | 0              | 6.222882                | 4.026224 | 2.189621 |
| 2                | 9                | 0              | 5.146563                | 3.897812 | 1.315711 |
| 3                | 9                | 0              | 5.941889                | 3.445247 | 3.426025 |
| 4                | 7                | 0              | 6.642048                | 5.531385 | 2.412938 |
| 5                | 7                | 0              | 7.447118                | 3.295927 | 1.562747 |
| 6                | 6                | 0              | 5.920721                | 6.618134 | 2.768594 |
| 7                | 6                | 0              | 6.811949                | 7.684039 | 3.068157 |
| 8                | 6                | 0              | 8.096736                | 7.225482 | 2.892529 |
| 9                | 6                | 0              | 7.996547                | 5.879871 | 2.478469 |
| 10               | 6                | 0              | 9.012311                | 5.016641 | 2.109091 |
| 11               | 6                | 0              | 8.756722                | 3.734853 | 1.633815 |
| 12               | 6                | 0              | 9.593816                | 2.729796 | 1.104011 |
| 13               | 1                | 0              | 10.669678               | 2.789390 | 1.013603 |
| 14               | 6                | 0              | 8.766380                | 1.684334 | 0.714395 |
| 15               | 1                | 0              | 9.057450                | 0.749030 | 0.259629 |
| 16               | 6                | 0              | 7.450004                | 2.073694 | 1.020105 |
| 17               | 1                | 0              | 6.525291                | 1.532588 | 0.876642 |
| 18               | 1                | 0              | 10.037529               | 5.367658 | 2.170436 |
| 19               | 1                | 0              | 9.021412                | 7.770932 | 3.023758 |
| 20               | 1                | 0              | 6.519542                | 8.676079 | 3.373738 |
| 21               | 6                | 0              | 4.403718                | 6.728792 | 2.784110 |
| 22               | 6                | 0              | 3.995156                | 8.064499 | 3.431324 |
| 23               | 1                | 0              | 4.357399                | 8.926211 | 2.861919 |
| 24               | 1                | 0              | 2.903423                | 8.126586 | 3.456853 |
| 25               | 1                | 0              | 4.358627                | 8.145301 | 4.461024 |
| 26               | 6                | 0              | 3.888231                | 6.722892 | 1.328844 |
| 27               | 1                | 0              | 4.320476                | 7.553980 | 0.761332 |
| 28               | 1                | 0              | 4.132276                | 5.787251 | 0.826045 |
| 29               | 1                | 0              | 2.799331                | 6.842420 | 1.332325 |
| 30               | 6                | 0              | 3.747003                | 5.594406 | 3.592169 |
| 31               | 1                | 0              | 3.879829                | 4.621311 | 3.124241 |
| 32               | 1                | 0              | 4.158988                | 5.545878 | 4.604453 |
| 33               | 1                | 0              | 2.672270                | 5.790468 | 3.666995 |

### DFT wb97xd/6-31++G(d,p) optimised ground state structure:

| Center<br>Number | Atomic<br>Number | Atomic<br>Type | Coordinates (Angstroms) |          |          |
|------------------|------------------|----------------|-------------------------|----------|----------|
|                  |                  |                | X                       | Y        | Z        |
| 1                | 5                | 0              | 6.222882                | 4.026224 | 2.189621 |
| 2                | 9                | 0              | 5.146563                | 3.897812 | 1.315711 |
| 3                | 9                | 0              | 5.941889                | 3.445247 | 3.426025 |
| 4                | 7                | 0              | 6.642048                | 5.531385 | 2.412938 |
| 5                | 7                | 0              | 7.447118                | 3.295927 | 1.562747 |
| 6                | 6                | 0              | 5.920721                | 6.618134 | 2.768594 |
| 7                | 6                | 0              | 6.811949                | 7.684039 | 3.068157 |
| 8                | 6                | 0              | 8.096736                | 7.225482 | 2.892529 |
| 9                | 6                | 0              | 7.996547                | 5.879871 | 2.478469 |
| 10               | 6                | 0              | 9.012311                | 5.016641 | 2.109091 |
| 11               | 6                | 0              | 8.756722                | 3.734853 | 1.633815 |
| 12               | 6                | 0              | 9.593816                | 2.729796 | 1.104011 |
| 13               | 1                | 0              | 10.669678               | 2.789390 | 1.013603 |
| 14               | 6                | 0              | 8.766380                | 1.684334 | 0.714395 |
| 15               | 1                | 0              | 9.057450                | 0.749030 | 0.259629 |
| 16               | 6                | 0              | 7.450004                | 2.073694 | 1.020105 |
| 17               | 1                | 0              | 6.525291                | 1.532588 | 0.876642 |
| 18               | 1                | 0              | 10.037529               | 5.367658 | 2.170436 |
| 19               | 1                | 0              | 9.021412                | 7.770932 | 3.023758 |
| 20               | 1                | 0              | 6.519542                | 8.676079 | 3.373738 |
| 21               | 6                | 0              | 4.403718                | 6.728792 | 2.784110 |
| 22               | 6                | 0              | 3.995156                | 8.064499 | 3.431324 |
| 23               | 1                | 0              | 4.357399                | 8.926211 | 2.861919 |
| 24               | 1                | 0              | 2.903423                | 8.126586 | 3.456853 |
| 25               | 1                | 0              | 4.358627                | 8.145301 | 4.461024 |
| 26               | 6                | 0              | 3.888231                | 6.722892 | 1.328844 |
| 27               | 1                | 0              | 4.320476                | 7.553980 | 0.761332 |

|    |   |   |          |          |          |
|----|---|---|----------|----------|----------|
| 28 | 1 | 0 | 4.132276 | 5.787251 | 0.826045 |
| 29 | 1 | 0 | 2.799331 | 6.842420 | 1.332325 |
| 30 | 6 | 0 | 3.747003 | 5.594406 | 3.592169 |
| 31 | 1 | 0 | 3.879829 | 4.621311 | 3.124241 |
| 32 | 1 | 0 | 4.158988 | 5.545878 | 4.604453 |
| 33 | 1 | 0 | 2.672270 | 5.790468 | 3.666995 |

DFT B3LYP/6-31G(d) optimised 1<sup>st</sup> excited-state structure:

| Center<br>Number | Atomic<br>Number | Atomic<br>Type | Coordinates (Angstroms) |          |           |
|------------------|------------------|----------------|-------------------------|----------|-----------|
|                  |                  |                | X                       | Y        | Z         |
| 1                | 5                | 0              | 6.249766                | 3.986832 | 2.338487  |
| 2                | 9                | 0              | 5.114396                | 3.811210 | 1.553172  |
| 3                | 9                | 0              | 6.082784                | 3.410569 | 3.590173  |
| 4                | 7                | 0              | 6.666481                | 5.489940 | 2.498003  |
| 5                | 7                | 0              | 7.438360                | 3.315777 | 1.593505  |
| 6                | 6                | 0              | 5.922770                | 6.603877 | 2.770031  |
| 7                | 6                | 0              | 6.819110                | 7.668768 | 3.076425  |
| 8                | 6                | 0              | 8.128934                | 7.194747 | 2.994118  |
| 9                | 6                | 0              | 8.048737                | 5.842437 | 2.619994  |
| 10               | 6                | 0              | 9.091947                | 4.958990 | 2.309876  |
| 11               | 6                | 0              | 8.795129                | 3.713824 | 1.707204  |
| 12               | 6                | 0              | 9.581700                | 2.768340 | 1.052779  |
| 13               | 1                | 0              | 10.657437               | 2.799600 | 0.947967  |
| 14               | 6                | 0              | 8.693755                | 1.797742 | 0.514529  |
| 15               | 1                | 0              | 8.962662                | 0.915881 | -0.051923 |
| 16               | 6                | 0              | 7.385866                | 2.184352 | 0.867347  |
| 17               | 1                | 0              | 6.441414                | 1.701063 | 0.663070  |
| 18               | 1                | 0              | 10.118842               | 5.280870 | 2.428660  |
| 19               | 1                | 0              | 9.045069                | 7.748354 | 3.148551  |
| 20               | 1                | 0              | 6.521071                | 8.671134 | 3.346046  |
| 21               | 6                | 0              | 4.404855                | 6.715893 | 2.750995  |
| 22               | 6                | 0              | 3.987170                | 8.104777 | 3.285289  |
| 23               | 1                | 0              | 4.371571                | 8.919033 | 2.660705  |
| 24               | 1                | 0              | 2.894528                | 8.176977 | 3.281299  |
| 25               | 1                | 0              | 4.327671                | 8.265195 | 4.314661  |
| 26               | 6                | 0              | 3.882825                | 6.593990 | 1.293994  |
| 27               | 1                | 0              | 4.312440                | 7.379513 | 0.661323  |
| 28               | 1                | 0              | 4.129860                | 5.622424 | 0.866854  |
| 29               | 1                | 0              | 2.792066                | 6.711768 | 1.286336  |
| 30               | 6                | 0              | 3.731526                | 5.648410 | 3.648920  |
| 31               | 1                | 0              | 3.886775                | 4.638072 | 3.274347  |
| 32               | 1                | 0              | 4.114106                | 5.700519 | 4.674172  |
| 33               | 1                | 0              | 2.651691                | 5.838234 | 3.678739  |
